# Supplementary material for: Transcriptome analysis during axillary bud growth in chrysanthemum (chrysanthemum×morifolium)
Source: PeerJ. 2023 Dec 15;11:e16436. doi: 10.7717/peerj.16436 (PMC10726743; doi:10.7717/peerj.16436)
Supplement: Supplemental Information 3 [file peerj-11-16436-s003.xlsx]

## Sheet: Sheet1
primers of qRT-PCR
gene id	primer
Cluster-29767.57110	TCATTCGGTGGCAGAAGTAGAGT-F
	TTCAGGTCCTTGATACAGTTGGG-R
Cluster-29767.70205	GCGGATTGTAACTCTGCCTCG-F
	ATCCTTAGAGTCACAGGGTTCCAC-R
Cluster-29767.76010	ACATGGTGGTTGCGTTTGGAG
	TGTAGCATTTGGCAATCTTCCTG
Cluster-29767.73322	AAGTGGCGGTGGTTCTGGATA
	CCTGCGAATCCACTATCACAATCT
Cluster-29767.94549	TACAGAAGGTCGCCTGAGCATC
	ATTTCCACCCGAACTATCACCG
Cluster-29767.56803	CGGTTTCAGATATGGATCAGGC
	ACCAAGTACACGGATTCACAAGAG
Cluster-29767.60624	TCGTCAGTCATTACCCTTCATCC
	CCTCCACAAAGTAGCATGTCTCG
Cluster-29767.48641	TGCCTTATACTAGCAAGTGACGGT
	TGCTTCCTTTCTGTAGAGCCAAC
ACTIN	TGGCATTGTGTTGGATTCTGG
	1
