# Supplementary material for: Transcriptome analysis during axillary bud growth in chrysanthemum (chrysanthemum×morifolium)
Source: PeerJ. 2023 Dec 15;11:e16436. doi: 10.7717/peerj.16436 (PMC10726743; doi:10.7717/peerj.16436)
Supplement: Supplemental Information 4 [file peerj-11-16436-s004.xlsx]

## Sheet: Sheet1
RT-PCR system
Component	Volume
5 x Reaction Buffer	4 μL
Oligo (dT)18 Primer (100 μM)	0.5 μL
And Random Hexamer primer (100 μM)	0.5 μL
Servicebio®RT Enzyme Mix	1 μL
Total RNA *	10 μL
RNase free water	Add to 20 μL
qRT-PCR system
Component	Volume
2×Taq Pro Universal SYBR qPCR Master Mix	10µL
Forward primer（10µM）	0.4µL
Reverse primer10µM）	0.4µL
cDNA	1µL
RNase-free ddH2O	to 20µL
