# Supplementary material for: Transcriptome analysis during axillary bud growth in chrysanthemum (chrysanthemum×morifolium)
Source: PeerJ. 2023 Dec 15;11:e16436. doi: 10.7717/peerj.16436 (PMC10726743; doi:10.7717/peerj.16436)
Supplement: Supplemental Information 5 [file peerj-11-16436-s005.xlsx]

## Sheet: Sheet1
Supplementary table 3.RT-PCR procedure
Step	Cycles	Temperature	Time
Step 1	1cycle	25°	5min
Step 2	1cycle	42°	30min
Step 3	1cycle	85°	5sec
