# Supplementary material for: Transcriptome analysis during axillary bud growth in chrysanthemum (chrysanthemum×morifolium)
Source: PeerJ. 2023 Dec 15;11:e16436. doi: 10.7717/peerj.16436 (PMC10726743; doi:10.7717/peerj.16436)
Supplement: Supplemental Information 6 [file peerj-11-16436-s006.xlsx]

## Sheet: Sheet1
Supplementary Table S4 qRT-PCR reaction program
Step	Cycles	Temperature	Time
Step 1	1cycle	95°	30sec
Step 2	40cycles	95°	15sec
		60°	30sec
Step 3	1cycle	95°	15sec
		60°	60sec
		95°	15sec
