# Supplementary material for: Transcriptome analysis during axillary bud growth in chrysanthemum (chrysanthemum×morifolium)
Source: PeerJ. 2023 Dec 15;11:e16436. doi: 10.7717/peerj.16436 (PMC10726743; doi:10.7717/peerj.16436)
Supplement: Supplemental Information 7 [file peerj-11-16436-s007.xlsx]

## Sheet: Sheet1
Sample sequencing data evaluation statistics table
sample	raw_reads	raw_bases	clean_reads	clean_bases	error_rate	Q20(%)	Q30(%)	GC_pct(%)
C15-0-1	23604553	7.1	22958310	6.9	0.03	97.75	93.51	41.43
C15-0-2	23288163	7	22630967	6.8	0.03	97.63	93.24	42.09
C15-0-3	21903804	6.6	21187350	6.4	0.03	97.71	93.43	42.04
CW-0-1	22974675	6.9	22319759	6.7	0.03	97.6	93.19	41.98
CW-0-2	23151593	6.9	22196357	6.7	0.03	97.68	93.31	42.56
CW-0-3	23266160	7	22704313	6.8	0.03	97.6	93.15	42.56
C15-24-1	22940255	6.9	22093415	6.6	0.03	97.6	93.22	41.76
C15-24-2	23420794	7	22716586	6.8	0.03	97.3	92.75	41.65
C15-24-3	22626533	6.8	22165684	6.6	0.03	97.43	92.95	41.58
CW-24-1	21733732	6.5	21124963	6.3	0.03	97.5	93.03	42.56
CW-24-2	22671713	6.8	22052164	6.6	0.03	97.34	92.79	42.08
CW-24-3	22997494	6.9	22621415	6.8	0.03	97.64	93.28	42.82
C15-48-1	23186292	7	22286300	6.7	0.03	97.76	93.55	43.09
C15-48-2	21479577	6.4	20743119	6.2	0.03	97.69	93.39	42.47
C15-48-3	21861162	6.6	21142320	6.3	0.03	97.63	93.18	43.56
CW-48-1	25496466	7.6	24822616	7.4	0.03	97.76	93.45	42.55
CW-48-2	23535383	7.1	23096608	6.9	0.03	97.65	93.26	42.57
CW-48-3	23746646	7.1	23265657	7	0.03	97.59	93.16	42.13
