# Supplementary material for: Transcriptome analysis during axillary bud growth in chrysanthemum (chrysanthemum×morifolium)
Source: PeerJ. 2023 Dec 15;11:e16436. doi: 10.7717/peerj.16436 (PMC10726743; doi:10.7717/peerj.16436)
Supplement: Supplemental Information 8 [file peerj-11-16436-s008.xlsx]

## Sheet: Sheet1
Supplementary table 6. Statistical table of assembly results
Length Range	Transcript	Unigene	Transcript(%)	Unigene(%）
300-500	139609	54736	0.2789	0.3661
500-1000	180010	49875	0.3596	0.3336
1000-2000	130864	31239	0.2614	0.209
2000+	50070	13646	0.1	0.0913
Total Number	500553	149496
