# Supplementary material for: Transcriptome analysis during axillary bud growth in chrysanthemum (chrysanthemum×morifolium)
Source: PeerJ. 2023 Dec 15;11:e16436. doi: 10.7717/peerj.16436 (PMC10726743; doi:10.7717/peerj.16436)
Supplement: Supplemental Information 9 [file peerj-11-16436-s009.xlsx]

## Sheet: Sheet1
Supplementary table 7. Annotation results of different databases
gene_id	NR GI	NR ID	NR Score	NR Evalue	NR Description	NT GI	NT ID	NT Score	NT Evalue	NT Description	KO ID	KO Name	KO Description	Http Link	Swissprot ID	Swissprot Score	Swissprot Evalue	Swissprot Description	PFAM ID	PFAM description	Gene Ontology Biological Pathway	BP Description	Gene Ontology Molecular Function	MF Description	Gene Ontology Cellular Component	CC Description	KOG ID	KOG Description
Cluster-29767.112743	--	--	--	--	--	--	--	--	--	--	--	--	--	--	--	--	--	--	--	--	--	--	--	--	--	--	--	--
Cluster-23194.0	--	--	--	--	--	--	--	--	--	--	--	--	--	--	--	--	--	--	--	--	--	--	--	--	--	--	--	--
Cluster-29767.112741	--	--	--	--	--	KT253079.1	KT253079	47	4.22e-14	Chrysanthemum x morifolium NIN-like protein (NLP14) mRNA, partial cds	--	--	--	--	--	--	--	--	--	--	--	--	--	--	--	--	--	--
Cluster-29767.112740	--	--	--	--	--	--	--	--	--	--	--	--	--	--	--	--	--	--	--	--	--	--	--	--	--	--	--	--
Cluster-29767.18349	--	--	--	--	--	--	--	--	--	--	--	--	--	--	--	--	--	--	--	--	--	--	--	--	--	--	--	--
Cluster-29767.112746	1387761545	PWA39352.1	486	2.9e-46	ACT domain-containing protein [Artemisia annua]	XM_023885615.1	XM_023885615	178	1.4e-86	PREDICTED: Lactuca sativa ACT domain-containing protein ACR4-like (LOC111889469), mRNA	--	--	--	--	Q8LJW3	284	2.9e-24	ACT domain-containing protein ACR4 OS=Arabidopsis thaliana OX=3702 GN=ACR4 PE=2 SV=1	--	--	--	--	--	--	--	--	--	--
Cluster-29767.112745	--	--	--	--	--	--	--	--	--	--	--	--	--	--	--	--	--	--	--	--	--	--	--	--	--	--	--	--
Cluster-29767.112744	--	--	--	--	--	--	--	--	--	--	--	--	--	--	--	--	--	--	--	--	--	--	--	--	--	--	--	--
Cluster-29767.18345	1045382296	GAU33339.1	373	1.7e-33	hypothetical protein TSUD_166040 [Trifolium subterraneum]	--	--	--	--	--	--	--	--	--	Q9S9U3	306	3.8e-27	Receptor-like protein 53 OS=Arabidopsis thaliana OX=3702 GN=RLP53 PE=3 SV=1	PF03150//PF00560//PF06420//PF13855//PF13516	Di-haem cytochrome c peroxidase//Leucine Rich Repeat//Mitochondrial genome maintenance MGM101//Leucine rich repeat//Leucine Rich repeat	GO:0006281//GO:0055114//GO:0000002	DNA repair//oxidation-reduction process//mitochondrial genome maintenance	GO:0016491//GO:0003697//GO:0005515	oxidoreductase activity//single-stranded DNA binding//protein binding	GO:0000262	mitochondrial chromosome	--	--
Cluster-29767.18344	1189384428	OSX71664.1	474	1.5e-44	hypothetical protein BU14_0513s0009 [Porphyra umbilicalis]	--	--	--	--	--	K08770	UBC	ubiquitin C	http://www.genome.jp/dbget-bin/www_bget?ko:K08770	Q8H159	433	3.3e-41	Polyubiquitin 10 OS=Arabidopsis thaliana OX=3702 GN=UBQ10 PE=2 SV=2	PF00789//PF14560//PF00240//PF00788//PF02196//PF04110	UBX domain//Ubiquitin-like domain//Ubiquitin family//Ras association (RalGDS/AF-6) domain//Raf-like Ras-binding domain//Ubiquitin-like autophagy protein Apg12	GO:0000045//GO:0007165	autophagosome assembly//signal transduction	GO:0005515	protein binding	GO:0005737	cytoplasm	KOG0001	Ubiquitin and ubiquitin-like proteins
Cluster-29767.18347	1387812369	PWA77568.1	3424	0	P-loop containing nucleoside triphosphate hydrolase [Artemisia annua]	XM_023911671.1	XM_023911671	244	9.63e-123	PREDICTED: Lactuca sativa uncharacterized ATP-dependent helicase C29A10.10c-like (LOC111916027), mRNA	K10706	SETX, ALS4	senataxin	http://www.genome.jp/dbget-bin/www_bget?ko:K10706	B6SFA4	251	6.4e-20	Probable helicase MAGATAMA 3 OS=Arabidopsis thaliana OX=3702 GN=MAA3 PE=2 SV=1	PF04851//PF00004//PF00910//PF01443//PF07652//PF05496	Type III restriction enzyme, res subunit//ATPase family associated with various cellular activities (AAA)//RNA helicase//Viral (Superfamily 1) RNA helicase//Flavivirus DEAD domain//Holliday junction DNA helicase RuvB P-loop domain	GO:0006281//GO:0006310	DNA repair//DNA recombination	GO:0003723//GO:0003724//GO:0016787//GO:0005524//GO:0009378//GO:0003677//GO:0004386	RNA binding//RNA helicase activity//hydrolase activity//ATP binding//four-way junction helicase activity//DNA binding//helicase activity	GO:0009379//GO:0005657	Holliday junction helicase complex//replication fork	--	--
Cluster-29767.112748	1387834101	PWA97321.1	756	2.7e-77	hypothetical protein CTI12_AA029930 [Artemisia annua]	--	--	--	--	--	--	--	--	--	--	--	--	--	--	--	--	--	--	--	--	--	--	--
Cluster-29767.18341	1387827509	PWA91166.1	984	1e-103	P-loop containing nucleoside triphosphate hydrolases superfamily protein [Artemisia annua]	XM_022166067.1	XM_022166067	318	4.09e-164	PREDICTED: Helianthus annuus GTP-binding protein At2g22870 (LOC110921721), mRNA	--	--	--	--	O81004	526	4.9e-52	GTP-binding protein At2g22870 OS=Arabidopsis thaliana OX=3702 GN=EMB2001 PE=2 SV=2	PF02421//PF01926//PF04548//PF03193	Ferrous iron transport protein B//50S ribosome-binding GTPase//AIG1 family//RsgA GTPase	--	--	GO:0003924//GO:0005525	GTPase activity//GTP binding	--	--	--	--
Cluster-29767.18340	508782407	EOY29663.1	165	5.3e-09	P-loop containing nucleoside triphosphate hydrolases superfamily protein isoform 2 [Theobroma cacao]	XM_011014936.1	XM_011014936	41	2.2e-10	PREDICTED: Populus euphratica GTP-binding protein At2g22870-like (LOC105117318), mRNA	K03978	engB	GTP-binding protein	http://www.genome.jp/dbget-bin/www_bget?ko:K03978	Q7MX68	129	3e-06	Probable GTP-binding protein EngB OS=Porphyromonas gingivalis (strain ATCC BAA-308 / W83) OX=242619 GN=engB PE=3 SV=1	--	--	--	--	--	--	--	--	--	--
Cluster-29767.18343	1387804874	PWA71101.1	423	2.9e-39	hypothetical protein CTI12_AA282680 [Artemisia annua]	XM_023889604.1	XM_023889604	62	2.08e-22	PREDICTED: Lactuca sativa uncharacterized LOC111893526 (LOC111893526), mRNA	--	--	--	--	--	--	--	--	--	--	--	--	--	--	--	--	--	--
Cluster-29767.18342	--	--	--	--	--	--	--	--	--	--	--	--	--	--	--	--	--	--	--	--	--	--	--	--	--	--	--	--
Cluster-28564.0	1387806599	PWA72568.1	783	5.7e-81	Armadillo [Artemisia annua]	XM_022139952.1	XM_022139952	178	7.42e-87	PREDICTED: Helianthus annuus U-box domain-containing protein 19-like (LOC110892806), mRNA	--	--	--	--	O80742	366	4.9e-34	U-box domain-containing protein 19 OS=Arabidopsis thaliana OX=3702 GN=PUB19 PE=2 SV=1	PF11789//PF04564	Zinc-finger of the MIZ type in Nse subunit//U-box domain	GO:0016567	protein ubiquitination	GO:0004842//GO:0008270	ubiquitin-protein transferase activity//zinc ion binding	--	--	--	--
Cluster-29767.112674	--	--	--	--	--	--	--	--	--	--	--	--	--	--	--	--	--	--	--	--	--	--	--	--	--	--	--	--
Cluster-17307.0	--	--	--	--	--	--	--	--	--	--	--	--	--	--	--	--	--	--	--	--	--	--	--	--	--	--	--	--
Cluster-13697.0	--	--	--	--	--	--	--	--	--	--	--	--	--	--	--	--	--	--	--	--	--	--	--	--	--	--	--	--
Cluster-29767.45374	1387834986	PWA98156.1	630	1.8e-62	hypothetical protein CTI12_AA022040 [Artemisia annua]	XM_022166944.1	XM_022166944	250	4.25e-126	PREDICTED: Helianthus annuus uncharacterized LOC110922720 (LOC110922720), mRNA	--	--	--	--	--	--	--	--	--	--	--	--	--	--	--	--	--	--
Cluster-29767.97240	--	--	--	--	--	--	--	--	--	--	--	--	--	--	--	--	--	--	--	--	--	--	--	--	--	--	--	--
Cluster-29767.112747	--	--	--	--	--	--	--	--	--	--	--	--	--	--	--	--	--	--	--	--	--	--	--	--	--	--	--	--
Cluster-29304.0	--	--	--	--	--	--	--	--	--	--	--	--	--	--	--	--	--	--	PF12125//PF13994	D domain of beta-TrCP//PgaD-like protein	GO:0043709	cell adhesion involved in single-species biofilm formation	GO:0046983	protein dimerization activity	--	--	--	--
Cluster-29767.97243	1387774531	PWA47429.1	138	3.2e-06	hypothetical protein CTI12_AA499760 [Artemisia annua]	--	--	--	--	--	--	--	--	--	--	--	--	--	--	--	--	--	--	--	--	--	--	--
Cluster-29767.18348	1387824716	PWA88604.1	1034	6.7e-110	concanavalin A-like lectin/glucanase domain-containing protein [Artemisia annua]	XM_023901924.1	XM_023901924	196	1.12e-96	PREDICTED: Lactuca sativa citrate-binding protein-like (LOC111906197), mRNA	--	--	--	--	Q39962	492	1.8e-48	Citrate-binding protein OS=Hevea brasiliensis OX=3981 GN=CBP PE=1 SV=1	--	--	--	--	--	--	--	--	--	--
Cluster-26776.0	--	--	--	--	--	--	--	--	--	--	--	--	--	--	--	--	--	--	--	--	--	--	--	--	--	--	--	--
Cluster-29767.66550	--	--	--	--	--	--	--	--	--	--	--	--	--	--	--	--	--	--	PF00616	GTPase-activator protein for Ras-like GTPase	GO:0043087	regulation of GTPase activity	--	--	--	--	--	--
Cluster-29767.66553	1387793793	PWA61882.1	444	9.4e-42	Alcohol dehydrogenase, C-terminal [Artemisia annua]	XM_025132107.1	XM_025132107	172	1.27e-83	PREDICTED: Cynara cardunculus var. scolymus sorbitol dehydrogenase (LOC112522796), mRNA	K00008	SORD, gutB	L-iditol 2-dehydrogenase	http://www.genome.jp/dbget-bin/www_bget?ko:K00008	Q9FJ95	390	6.5e-37	Sorbitol dehydrogenase OS=Arabidopsis thaliana OX=3702 GN=SDH PE=1 SV=1	PF00107//PF00111	Zinc-binding dehydrogenase//2Fe-2S iron-sulfur cluster binding domain	GO:0006118//GO:0055114	obsolete electron transport//oxidation-reduction process	GO:0009055//GO:0051536	electron transfer activity//iron-sulfur cluster binding	--	--	KOG0024	Sorbitol dehydrogenase
Cluster-29767.33482	--	--	--	--	--	--	--	--	--	--	--	--	--	--	--	--	--	--	--	--	--	--	--	--	--	--	--	--
Cluster-29767.66555	1389771500	XP_024987700.1	1099	4.7e-117	protein pleiotropic regulatory locus 1 [Cynara cardunculus var. scolymus]	XM_025131933.1	XM_025131933	359	0	PREDICTED: Cynara cardunculus var. scolymus protein pleiotropic regulatory locus 1 (LOC112522660), transcript variant X2, mRNA	K12862	PLRG1, PRL1, PRP46	pleiotropic regulator 1	http://www.genome.jp/dbget-bin/www_bget?ko:K12862	Q42384	935	1.9e-99	Protein pleiotropic regulatory locus 1 OS=Arabidopsis thaliana OX=3702 GN=PRL1 PE=1 SV=1	PF00400	WD domain, G-beta repeat	--	--	GO:0005515	protein binding	--	--	KOG0285	Pleiotropic regulator 1
Cluster-29767.66554	1387759428	PWA38300.1	1499	5.1e-163	neutral/alkaline non-lysosomal ceramidase [Artemisia annua]	XM_025111818.1	XM_025111818	598	0	PREDICTED: Cynara cardunculus var. scolymus neutral ceramidase 2-like (LOC112507292), mRNA	K12349	ASAH2	neutral ceramidase	http://www.genome.jp/dbget-bin/www_bget?ko:K12349	F4KHQ8	1229	4e-133	Neutral ceramidase 3 OS=Arabidopsis thaliana OX=3702 GN=NCER3 PE=2 SV=1	PF00085	Thioredoxin	GO:0045454	cell redox homeostasis	--	--	--	--	KOG2232	Ceramidases
Cluster-29767.66557	1387804551	PWA70817.1	806	7.2e-83	cullin repeat-like-containing domain-containing protein [Artemisia annua]	XM_023872406.1	XM_023872406	300	6.92e-154	PREDICTED: Lactuca sativa trafficking protein particle complex subunit 5-like (LOC111875877), transcript variant X2, mRNA	K20280	TRAPPC5, TRS31	trafficking protein particle complex subunit 5	http://www.genome.jp/dbget-bin/www_bget?ko:K20280	Q54YG5	451	4e-43	Trafficking protein particle complex subunit 5 OS=Dictyostelium discoideum OX=44689 GN=trappc5 PE=3 SV=1	--	--	--	--	--	--	--	--	KOG3315	Transport protein particle (TRAPP) complex subunit
Cluster-29767.66556	1387777327	PWA49381.1	3023	0	YTH domain-containing protein [Artemisia annua]	XM_025138510.1	XM_025138510	845	0	PREDICTED: Cynara cardunculus var. scolymus uncharacterized LOC112527728 (LOC112527728), transcript variant X5, mRNA	--	--	--	--	A0A1P8AS03	765	1.4e-79	YTH domain-containing protein ECT4 OS=Arabidopsis thaliana OX=3702 GN=ECT4 PE=2 SV=1	PF04146	YT521-B-like domain	--	--	GO:0003723	RNA binding	--	--	--	--
Cluster-29767.66559	1387821122	PWA85346.1	204	1.4e-13	dDENN domain-containing protein [Artemisia annua]	--	--	--	--	--	--	--	--	--	--	--	--	--	--	--	--	--	--	--	--	--	--	--
Cluster-29767.66558	1340493784	XP_023728174.1	863	7.5e-90	trafficking protein particle complex subunit 5-like isoform X2 [Lactuca sativa]	XM_023872406.1	XM_023872406	368	0	PREDICTED: Lactuca sativa trafficking protein particle complex subunit 5-like (LOC111875877), transcript variant X2, mRNA	K20280	TRAPPC5, TRS31	trafficking protein particle complex subunit 5	http://www.genome.jp/dbget-bin/www_bget?ko:K20280	Q54YG5	527	2.6e-52	Trafficking protein particle complex subunit 5 OS=Dictyostelium discoideum OX=44689 GN=trappc5 PE=3 SV=1	--	--	--	--	--	--	--	--	KOG3315	Transport protein particle (TRAPP) complex subunit
Cluster-29767.97244	1387788989	PWA58078.1	817	2.1e-84	ribonuclease H-like domain-containing protein [Artemisia annua]	--	--	--	--	--	--	--	--	--	Q94HW2	342	9.7e-31	Retrovirus-related Pol polyprotein from transposon RE1 OS=Arabidopsis thaliana OX=3702 GN=RE1 PE=2 SV=1	--	--	--	--	--	--	--	--	--	--
Cluster-1899.0	1305236313	PKI50693.1	259	3.4e-20	hypothetical protein CRG98_028930 [Punica granatum]	XM_018390932.1	XM_018390932	493	0	Fusarium oxysporum f. sp. lycopersici 4287 small nuclear ribonucleoprotein F mRNA	K11098	SNRPF, SMF	small nuclear ribonucleoprotein F	http://www.genome.jp/dbget-bin/www_bget?ko:K11098	Q9P5Z8	271	5.3e-23	Probable small nuclear ribonucleoprotein F OS=Neurospora crassa (strain ATCC 24698 / 74-OR23-1A / CBS 708.71 / DSM 1257 / FGSC 987) OX=367110 GN=B2O8.190 PE=3 SV=1	--	--	--	--	--	--	--	--	KOG3482	Small nuclear ribonucleoprotein (snRNP) SMF
Cluster-29767.33487	1387834821	PWA98001.1	473	1.1e-44	importin-5 [Artemisia annua]	XM_019575879.1	XM_019575879	89	4.85e-37	PREDICTED: Lupinus angustifolius importin-5-like (LOC109338604), mRNA	K20222	IPO5, KPNB3, RANBP5	importin-5	http://www.genome.jp/dbget-bin/www_bget?ko:K20222	O74476	242	2.5e-19	Importin subunit beta-3 OS=Schizosaccharomyces pombe (strain 972 / ATCC 24843) OX=284812 GN=sal3 PE=3 SV=1	PF00514//PF02985	Armadillo/beta-catenin-like repeat//HEAT repeat	--	--	GO:0005515	protein binding	--	--	KOG2171	Karyopherin (importin) beta 3
Cluster-17657.0	1387817270	PWA81898.1	220	1.3e-15	reverse transcriptase domain-containing protein [Artemisia annua]	--	--	--	--	--	--	--	--	--	--	--	--	--	--	--	--	--	--	--	--	--	--	--
Cluster-29767.74632	1387824738	PWA88624.1	675	3.3e-68	Aminoacyl-tRNA synthetase, class 1a, anticodon-binding [Artemisia annua]	--	--	--	--	--	--	--	--	--	Q9C713	243	1.6e-19	Arginine--tRNA ligase, cytoplasmic OS=Arabidopsis thaliana OX=3702 GN=At1g66530 PE=1 SV=1	--	--	--	--	--	--	--	--	KOG4426	Arginyl-tRNA synthetase
Cluster-31053.0	1191646657	OTF98630.1	846	6.6e-88	putative receptor like protein 44 [Helianthus annuus]	--	--	--	--	--	--	--	--	--	Q9M2Y3	725	2.7e-75	Receptor-like protein 44 OS=Arabidopsis thaliana OX=3702 GN=RLP44 PE=2 SV=1	PF13516//PF13855//PF00560	Leucine Rich repeat//Leucine rich repeat//Leucine Rich Repeat	--	--	GO:0005515	protein binding	--	--	--	--
Cluster-21849.0	--	--	--	--	--	--	--	--	--	--	--	--	--	--	--	--	--	--	--	--	--	--	--	--	--	--	--	--
Cluster-19843.0	1199289377	OUS44505.1	253	1.2e-19	conjugal transfer protein-domain-containing protein [Ostreococcus tauri]	--	--	--	--	--	--	--	--	--	--	--	--	--	--	--	--	--	--	--	--	--	--	--
Cluster-29767.18346	1387787203	PWA56680.1	1122	4.6e-120	receptor-like protein kinase [Artemisia annua]	--	--	--	--	--	--	--	--	--	P93194	643	6.1e-66	Receptor-like protein kinase OS=Ipomoea nil OX=35883 GN=INRPK1 PE=2 SV=2	PF00560//PF13855	Leucine Rich Repeat//Leucine rich repeat	--	--	GO:0005515	protein binding	--	--	--	--
Cluster-21251.0	--	--	--	--	--	--	--	--	--	--	--	--	--	--	--	--	--	--	--	--	--	--	--	--	--	--	--	--
Cluster-11239.0	1387827549	PWA91203.1	206	6.2e-14	ATPase assembly factor ATP10, mitochondria [Artemisia annua]	--	--	--	--	--	K18192	ATP10	mitochondrial ATPase complex subunit ATP10	http://www.genome.jp/dbget-bin/www_bget?ko:K18192	--	--	--	--	--	--	--	--	--	--	--	--	--	--
Cluster-29767.21452	1387815758	PWA80558.1	324	8.4e-28	hypothetical protein CTI12_AA195180 [Artemisia annua]	--	--	--	--	--	--	--	--	--	--	--	--	--	--	--	--	--	--	--	--	--	--	--
Cluster-18472.0	--	--	--	--	--	--	--	--	--	--	--	--	--	--	--	--	--	--	--	--	--	--	--	--	--	--	--	--
Cluster-29767.68260	1387829691	PWA93186.1	166	7.8e-09	nucleotide-binding alpha-beta plait domain-containing protein [Artemisia annua]	--	--	--	--	--	--	--	--	--	--	--	--	--	--	--	--	--	--	--	--	--	--	--
Cluster-29767.61020	1387780408	PWA51598.1	4009	0	hypothetical protein CTI12_AA462630 [Artemisia annua]	XM_022173169.1	XM_022173169	938	0	PREDICTED: Helianthus annuus nuclear pore complex protein NUP96-like (LOC110929971), mRNA	K14297	NUP98, ADAR2, NUP116	nuclear pore complex protein Nup98-Nup96	http://www.genome.jp/dbget-bin/www_bget?ko:K14297	Q8LLD0	2200	7.6e-246	Nuclear pore complex protein NUP96 OS=Arabidopsis thaliana OX=3702 GN=NUP96 PE=1 SV=1	PF04096	Nucleoporin autopeptidase	GO:0006913	nucleocytoplasmic transport	GO:0017056	structural constituent of nuclear pore	GO:0005643	nuclear pore	KOG0845	Nuclear pore complex, Nup98 component (sc Nup145/Nup100/Nup116)
Cluster-865.0	--	--	--	--	--	XM_018400626.1	XM_018400626	411	0	Fusarium oxysporum f. sp. lycopersici 4287 hypothetical protein mRNA	--	--	--	--	--	--	--	--	--	--	--	--	--	--	--	--	--	--
Cluster-29767.61022	1387793101	PWA61321.1	1648	8.7e-181	cellulose synthase [Artemisia annua]	XM_022184029.1	XM_022184029	615	0	PREDICTED: Helianthus annuus cellulose synthase A catalytic subunit 5 [UDP-forming]-like (LOC110942291), mRNA	K10999	CESA	cellulose synthase A	http://www.genome.jp/dbget-bin/www_bget?ko:K10999	O48947	1403	8.5e-154	Cellulose synthase A catalytic subunit 2 [UDP-forming] OS=Arabidopsis thaliana OX=3702 GN=CESA2 PE=1 SV=1	PF03552	Cellulose synthase	GO:0005982//GO:0006011//GO:0030244//GO:0005985	starch metabolic process//UDP-glucose metabolic process//cellulose biosynthetic process//sucrose metabolic process	GO:0016760	cellulose synthase (UDP-forming) activity	GO:0016020	membrane	--	--
Cluster-29767.61023	1322424828	PLY98993.1	1381	5.8e-150	hypothetical protein LSAT_7X34581 [Lactuca sativa]	XM_022131336.1	XM_022131336	422	0	PREDICTED: Helianthus annuus eukaryotic initiation factor 4A-15-like (LOC110883614), mRNA	K03257	EIF4A	translation initiation factor 4A	http://www.genome.jp/dbget-bin/www_bget?ko:K03257	P41377	1352	5.1e-148	Eukaryotic initiation factor 4A-2 OS=Arabidopsis thaliana OX=3702 GN=TIF4A-2 PE=1 SV=1	PF00579//PF00270	tRNA synthetases class I (W and Y)//DEAD/DEAH box helicase	GO:0006418	tRNA aminoacylation for protein translation	GO:0000166//GO:0005524//GO:0004812//GO:0003676	nucleotide binding//ATP binding//aminoacyl-tRNA ligase activity//nucleic acid binding	--	--	KOG0327	Translation initiation factor 4F, helicase subunit (eIF-4A) and related helicases
Cluster-29767.61024	--	--	--	--	--	--	--	--	--	--	--	--	--	--	--	--	--	--	PF02472	Biopolymer transport protein ExbD/TolR	GO:0055085	transmembrane transport	GO:0022857	transmembrane transporter activity	--	--	--	--
Cluster-29767.61025	--	--	--	--	--	--	--	--	--	--	--	--	--	--	--	--	--	--	--	--	--	--	--	--	--	--	--	--
Cluster-29767.61026	--	--	--	--	--	--	--	--	--	--	--	--	--	--	--	--	--	--	--	--	--	--	--	--	--	--	--	--
Cluster-29767.61027	--	--	--	--	--	--	--	--	--	--	--	--	--	--	--	--	--	--	PF08272	Topoisomerase I zinc-ribbon-like	GO:0006265	DNA topological change	GO:0003917//GO:0003677	DNA topoisomerase type I (single strand cut, ATP-independent) activity//DNA binding	--	--	--	--
Cluster-29767.61028	--	--	--	--	--	--	--	--	--	--	--	--	--	--	--	--	--	--	--	--	--	--	--	--	--	--	--	--
Cluster-29767.61029	--	--	--	--	--	--	--	--	--	--	--	--	--	--	--	--	--	--	--	--	--	--	--	--	--	--	--	--
Cluster-19188.0	--	--	--	--	--	--	--	--	--	--	--	--	--	--	--	--	--	--	--	--	--	--	--	--	--	--	--	--
Cluster-4500.0	--	--	--	--	--	--	--	--	--	--	--	--	--	--	--	--	--	--	--	--	--	--	--	--	--	--	--	--
Cluster-11116.0	--	--	--	--	--	--	--	--	--	--	--	--	--	--	--	--	--	--	--	--	--	--	--	--	--	--	--	--
Cluster-31289.0	1387826692	PWA90415.1	587	2.6e-58	pentatricopeptide repeat (PPR) superfamily protein [Artemisia annua]	--	--	--	--	--	--	--	--	--	Q9LNU6	290	2.7e-25	Pentatricopeptide repeat-containing protein At1g20230 OS=Arabidopsis thaliana OX=3702 GN=PCMP-H21 PE=2 SV=2	--	--	--	--	--	--	--	--	--	--
Cluster-924.0	1344030552	XP_023898386.1	154	4.8e-08	uncharacterized protein LOC112010278 [Quercus suber]	XM_023571978.1	XM_023571978	386	0	Fusarium fujikuroi IMI 58289 related to Rab6 GTPase activating protein, GAPCenA (FFUJ_04704), partial mRNA	--	--	--	--	--	--	--	--	PF09726//PF02862	Macoilin family//DDHD domain	GO:0023041	neuronal signal transduction	GO:0046872	metal ion binding	GO:0030867	rough endoplasmic reticulum membrane	--	--
Cluster-29682.0	--	--	--	--	--	--	--	--	--	--	--	--	--	--	--	--	--	--	--	--	--	--	--	--	--	--	--	--
Cluster-29767.87768	--	--	--	--	--	--	--	--	--	--	--	--	--	--	--	--	--	--	--	--	--	--	--	--	--	--	--	--
Cluster-29767.46461	1387829373	PWA92891.1	194	5.2e-12	CBL-interacting protein kinase 33 [Artemisia annua]	--	--	--	--	--	--	--	--	--	Q84VQ3	158	3e-09	CBL-interacting serine/threonine-protein kinase 26 OS=Arabidopsis thaliana OX=3702 GN=CIPK26 PE=1 SV=2	--	--	--	--	--	--	--	--	--	--
Cluster-6497.0	--	--	--	--	--	--	--	--	--	--	--	--	--	--	--	--	--	--	--	--	--	--	--	--	--	--	--	--
Cluster-22448.0	--	--	--	--	--	--	--	--	--	--	--	--	--	--	--	--	--	--	--	--	--	--	--	--	--	--	--	--
Cluster-17983.0	--	--	--	--	--	--	--	--	--	--	--	--	--	--	--	--	--	--	--	--	--	--	--	--	--	--	--	--
Cluster-8715.0	1387806758	PWA72705.1	350	6.2e-31	replication protein A 70 kDa DNA-binding subunit D [Artemisia annua]	--	--	--	--	--	K07466	RFA1, RPA1, rpa	replication factor A1	http://www.genome.jp/dbget-bin/www_bget?ko:K07466	--	--	--	--	--	--	--	--	--	--	--	--	--	--
Cluster-15885.0	--	--	--	--	--	--	--	--	--	--	--	--	--	--	--	--	--	--	--	--	--	--	--	--	--	--	--	--
Cluster-20514.0	1387829679	PWA93175.1	623	5.1e-62	phosphofructokinase domain, ATP-dependent 6-phosphofructokinase [Artemisia annua]	--	--	--	--	--	--	--	--	--	Q9FNJ4	215	4e-16	Putative F-box/FBD/LRR-repeat protein At5g22670 OS=Arabidopsis thaliana OX=3702 GN=At5g22670 PE=4 SV=1	PF13855	Leucine rich repeat	--	--	GO:0005515	protein binding	--	--	--	--
Cluster-29767.108137	1387821356	PWA85554.1	391	1.1e-35	disease resistance protein (TIR-NBS-LRR class) [Artemisia annua]	XM_025103879.1	XM_025103879	74	3.18e-29	PREDICTED: Cynara cardunculus var. scolymus TMV resistance protein N-like (LOC112500394), mRNA	--	--	--	--	Q40392	167	4e-11	TMV resistance protein N OS=Nicotiana glutinosa OX=35889 GN=N PE=1 SV=1	--	--	--	--	--	--	--	--	--	--
Cluster-20337.0	--	--	--	--	--	--	--	--	--	--	--	--	--	--	--	--	--	--	--	--	--	--	--	--	--	--	--	--
Cluster-16394.1	--	--	--	--	--	--	--	--	--	--	--	--	--	--	--	--	--	--	--	--	--	--	--	--	--	--	--	--
Cluster-29767.112532	1387773404	PWA46665.1	786	3e-81	hypothetical protein CTI12_AA506200 [Artemisia annua]	--	--	--	--	--	--	--	--	--	--	--	--	--	--	--	--	--	--	--	--	--	--	--
Cluster-14709.0	--	--	--	--	--	--	--	--	--	--	--	--	--	--	--	--	--	--	--	--	--	--	--	--	--	--	--	--
Cluster-19936.0	--	--	--	--	--	--	--	--	--	--	--	--	--	--	--	--	--	--	--	--	--	--	--	--	--	--	--	--
Cluster-29767.99339	--	--	--	--	--	--	--	--	--	--	--	--	--	--	--	--	--	--	--	--	--	--	--	--	--	--	--	--
Cluster-29767.99338	--	--	--	--	--	--	--	--	--	--	--	--	--	--	--	--	--	--	--	--	--	--	--	--	--	--	--	--
Cluster-29767.99337	1387830029	PWA93499.1	261	7e-20	COBRA-like protein-7 precursor [Artemisia annua]	--	--	--	--	--	--	--	--	--	Q8GZ17	183	3e-12	COBRA-like protein 7 OS=Arabidopsis thaliana OX=3702 GN=COBL7 PE=2 SV=2	--	--	--	--	--	--	--	--	--	--
Cluster-29767.99336	1191648004	OTF99977.1	516	7.3e-50	putative ferric reduction oxidase 4 [Helianthus annuus]	--	--	--	--	--	K00521	E1.16.1.7	ferric-chelate reductase	http://www.genome.jp/dbget-bin/www_bget?ko:K00521	Q8W110	340	7.1e-31	Ferric reduction oxidase 4 OS=Arabidopsis thaliana OX=3702 GN=FRO4 PE=2 SV=1	--	--	--	--	--	--	--	--	--	--
Cluster-29767.99335	1387817784	PWA82356.1	646	3.2e-64	ferric reduction oxidase 4 [Artemisia annua]	XM_022151006.1	XM_022151006	229	2.51e-114	PREDICTED: Helianthus annuus uncharacterized membrane protein YjcL-like (LOC110905123), mRNA	--	--	--	--	O31634	172	1.1e-10	Uncharacterized membrane protein YjcL OS=Bacillus subtilis (strain 168) OX=224308 GN=yjcL PE=4 SV=1	--	--	--	--	--	--	--	--	--	--
Cluster-29767.99334	--	--	--	--	--	--	--	--	--	--	--	--	--	--	--	--	--	--	--	--	--	--	--	--	--	--	--	--
Cluster-29767.99333	--	--	--	--	--	MH716014.1	MH716014	150	2.14e-71	Chrysanthemum indicum mitochondrion, complete genome	--	--	--	--	--	--	--	--	--	--	--	--	--	--	--	--	--	--
Cluster-29767.99332	--	--	--	--	--	KP332230.1	KP332230	216	8.92e-108	Chrysanthemum x morifolium microsatellite JH-389 sequence	--	--	--	--	--	--	--	--	--	--	--	--	--	--	--	--	--	--
Cluster-29767.99331	--	--	--	--	--	KP333161.1	KP333161	216	1.21e-107	Chrysanthemum x morifolium microsatellite JH-1327 sequence	--	--	--	--	--	--	--	--	PF04566	RNA polymerase Rpb2, domain 4	GO:0006144//GO:0006351//GO:0006206	purine nucleobase metabolic process//transcription, DNA-templated//pyrimidine nucleobase metabolic process	GO:0003899//GO:0003677	DNA-directed 5'-3' RNA polymerase activity//DNA binding	GO:0005730	nucleolus	--	--
Cluster-29767.99330	1387833015	PWA96292.1	865	5.4e-90	rhodanese/Cell cycle control phosphatase superfamily protein [Artemisia annua]	XM_025114934.1	XM_025114934	308	1.27e-158	PREDICTED: Cynara cardunculus var. scolymus rhodanese-like domain-containing protein 8, chloroplastic (LOC112509784), mRNA	--	--	--	--	F4I933	634	1.2e-64	Rhodanese-like domain-containing protein 8, chloroplastic OS=Arabidopsis thaliana OX=3702 GN=STR8 PE=4 SV=1	--	--	--	--	--	--	--	--	--	--
Cluster-29767.8882	1387754741	PWA36274.1	1185	5.5e-127	peptidase S10, serine carboxypeptidase, Alpha/Beta hydrolase fold protein [Artemisia annua]	XM_025126728.1	XM_025126728	253	6.27e-128	PREDICTED: Cynara cardunculus var. scolymus serine carboxypeptidase-like 17 (LOC112518932), mRNA	K16296	SCPL-I	serine carboxypeptidase-like clade I	http://www.genome.jp/dbget-bin/www_bget?ko:K16296	Q9CAU1	623	3.1e-63	Serine carboxypeptidase-like 3 OS=Arabidopsis thaliana OX=3702 GN=SCPL3 PE=2 SV=1	PF00450//PF00942//PF00326	Serine carboxypeptidase//Cellulose binding domain//Prolyl oligopeptidase family	GO:0006508//GO:0005975	proteolysis//carbohydrate metabolic process	GO:0008236//GO:0004185//GO:0030248	serine-type peptidase activity//serine-type carboxypeptidase activity//cellulose binding	--	--	--	--
Cluster-29767.8883	--	--	--	--	--	--	--	--	--	--	--	--	--	--	--	--	--	--	--	--	--	--	--	--	--	--	--	--
Cluster-29767.30044	--	--	--	--	--	--	--	--	--	--	--	--	--	--	--	--	--	--	PF02689	Helicase	--	--	GO:0004386//GO:0005524	helicase activity//ATP binding	--	--	--	--
Cluster-15386.0	1228933148	XP_022016499.1	288	2.1e-23	peptidyl-prolyl cis-trans isomerase FKBP43 [Helianthus annuus]	--	--	--	--	--	--	--	--	--	F4J9Q6	188	3.2e-13	Peptidyl-prolyl cis-trans isomerase FKBP43 OS=Arabidopsis thaliana OX=3702 GN=FKBP43 PE=2 SV=1	--	--	--	--	--	--	--	--	--	--
Cluster-29767.8886	--	--	--	--	--	--	--	--	--	--	--	--	--	--	--	--	--	--	--	--	--	--	--	--	--	--	--	--
Cluster-29767.8887	--	--	--	--	--	--	--	--	--	--	--	--	--	--	--	--	--	--	--	--	--	--	--	--	--	--	--	--
Cluster-29767.8884	--	--	--	--	--	--	--	--	--	--	--	--	--	--	--	--	--	--	PF00069	Protein kinase domain	GO:0006468	protein phosphorylation	GO:0005524//GO:0004672	ATP binding//protein kinase activity	--	--	--	--
Cluster-29767.8885	1191669848	OTG21814.1	148	1.5e-07	putative sec1/munc18-like (SM) proteins superfamily [Helianthus annuus]	--	--	--	--	--	K15292	STXBP1, MUNC18-1	syntaxin-binding protein 1	http://www.genome.jp/dbget-bin/www_bget?ko:K15292	Q9C5X3	131	5.5e-07	SNARE-interacting protein KEULE OS=Arabidopsis thaliana OX=3702 GN=KEU PE=1 SV=2	--	--	--	--	--	--	--	--	--	--
Cluster-12681.0	--	--	--	--	--	--	--	--	--	--	--	--	--	--	--	--	--	--	--	--	--	--	--	--	--	--	--	--
Cluster-29767.8888	1387831832	PWA95182.1	1064	1.1e-112	Sec1-like protein [Artemisia annua]	XM_025108681.1	XM_025108681	362	0	PREDICTED: Cynara cardunculus var. scolymus sec1 family domain-containing protein MIP3 (LOC112504736), transcript variant X9, mRNA	--	--	--	--	F4IP69	515	1.9e-50	Sec1 family domain-containing protein MIP3 OS=Arabidopsis thaliana OX=3702 GN=MIP3 PE=1 SV=1	PF04983	RNA polymerase Rpb1, domain 3	GO:0006206//GO:0006144//GO:0006351	pyrimidine nucleobase metabolic process//purine nucleobase metabolic process//transcription, DNA-templated	GO:0003677//GO:0003899	DNA binding//DNA-directed 5'-3' RNA polymerase activity	GO:0005730	nucleolus	--	--
Cluster-29767.8889	--	--	--	--	--	XM_025111470.1	XM_025111470	34	1.62e-06	PREDICTED: Cynara cardunculus var. scolymus heterogeneous nuclear ribonucleoprotein 1-like (LOC112507064), mRNA	--	--	--	--	--	--	--	--	--	--	--	--	--	--	--	--	--	--
Cluster-29767.100822	1228833529	XP_021974763.1	239	5.4e-18	uncharacterized protein LOC110869866 [Helianthus annuus]	--	--	--	--	--	--	--	--	--	--	--	--	--	--	--	--	--	--	--	--	--	--	--
Cluster-11366.0	--	--	--	--	--	--	--	--	--	--	--	--	--	--	--	--	--	--	--	--	--	--	--	--	--	--	--	--
Cluster-5329.0	1343979970	XP_023886042.1	486	1.4e-46	superoxide dismutase [Cu-Zn] [Quercus suber]	XM_019145587.1	XM_019145587	105	2.57e-46	Kwoniella mangroviensis CBS 8507 superoxide dismutase [Cu-Zn] partial mRNA	K04565	SOD1	superoxide dismutase, Cu-Zn family	http://www.genome.jp/dbget-bin/www_bget?ko:K04565	Q9C0N4	586	1.4e-59	Superoxide dismutase [Cu-Zn] OS=Cryptococcus gattii OX=552467 GN=SOD1 PE=2 SV=3	PF00080	Copper/zinc superoxide dismutase (SODC)	GO:0006801	superoxide metabolic process	GO:0046872	metal ion binding	--	--	KOG0441	Cu2+/Zn2+ superoxide dismutase SOD1
Cluster-29767.8848	1387830583	PWA94014.1	176	2e-10	hypothetical protein CTI12_AA043600 [Artemisia annua]	--	--	--	--	--	--	--	--	--	--	--	--	--	--	--	--	--	--	--	--	--	--	--
Cluster-6181.0	--	--	--	--	--	--	--	--	--	--	--	--	--	--	--	--	--	--	--	--	--	--	--	--	--	--	--	--
Cluster-29767.39175	--	--	--	--	--	--	--	--	--	--	--	--	--	--	--	--	--	--	--	--	--	--	--	--	--	--	--	--
Cluster-29767.56449	1387791842	PWA60317.1	676	2.8e-68	hypothetical protein CTI12_AA321400 [Artemisia annua]	XM_008457091.2	XM_008457091	43	1.62e-11	PREDICTED: Cucumis melo uncharacterized LOC103495508 (LOC103495508), mRNA	--	--	--	--	--	--	--	--	--	--	--	--	--	--	--	--	--	--
Cluster-18511.0	--	--	--	--	--	--	--	--	--	--	--	--	--	--	--	--	--	--	PF04277	Oxaloacetate decarboxylase, gamma chain	GO:0006814//GO:0006560//GO:0006525//GO:0006090//GO:0036376	sodium ion transport//proline metabolic process//arginine metabolic process//pyruvate metabolic process//sodium ion export across plasma membrane	GO:0008948//GO:0015081	oxaloacetate decarboxylase activity//sodium ion transmembrane transporter activity	GO:0016020	membrane	--	--
Cluster-29767.66551	--	--	--	--	--	--	--	--	--	--	--	--	--	--	--	--	--	--	--	--	--	--	--	--	--	--	--	--
Cluster-12677.0	--	--	--	--	--	--	--	--	--	--	--	--	--	--	--	--	--	--	--	--	--	--	--	--	--	--	--	--
Cluster-29767.16030	1387788522	PWA57701.1	225	2e-16	hypothetical protein CTI12_AA406900 [Artemisia annua]	XM_025111572.1	XM_025111572	72	4.16e-28	PREDICTED: Cynara cardunculus var. scolymus TMV resistance protein N-like (LOC112507132), mRNA	--	--	--	--	--	--	--	--	--	--	--	--	--	--	--	--	--	--
Cluster-29767.27091	--	--	--	--	--	--	--	--	--	--	--	--	--	--	--	--	--	--	--	--	--	--	--	--	--	--	--	--
Cluster-15723.0	1228929494	XP_022014932.1	373	3.5e-33	heat shock cognate 70 kDa protein-like [Helianthus annuus]	--	--	--	--	--	K03283	HSPA1_8	heat shock 70kDa protein 1/8	http://www.genome.jp/dbget-bin/www_bget?ko:K03283	P25840	290	5.6e-25	Heat shock 70 kDa protein OS=Chlamydomonas reinhardtii OX=3055 GN=HSP70 PE=2 SV=2	--	--	--	--	--	--	--	--	KOG0101	Molecular chaperones HSP70/HSC70, HSP70 superfamily
Cluster-29767.66552	1387768361	PWA43329.1	311	8.9e-26	leucine-rich repeat protein kinase family protein [Artemisia annua]	--	--	--	--	--	--	--	--	--	--	--	--	--	--	--	--	--	--	--	--	--	--	--
Cluster-18308.0	--	--	--	--	--	--	--	--	--	--	--	--	--	--	--	--	--	--	--	--	--	--	--	--	--	--	--	--
Cluster-29767.104774	--	--	--	--	--	--	--	--	--	--	--	--	--	--	--	--	--	--	--	--	--	--	--	--	--	--	--	--
Cluster-29767.6377	1387768155	PWA43203.1	229	7.8e-17	hypothetical protein CTI12_AA535610 [Artemisia annua]	--	--	--	--	--	--	--	--	--	--	--	--	--	--	--	--	--	--	--	--	--	--	--
Cluster-29767.57238	--	--	--	--	--	--	--	--	--	--	--	--	--	--	--	--	--	--	PF14862	Big defensin	GO:0050830//GO:0050829	defense response to Gram-positive bacterium//defense response to Gram-negative bacterium	--	--	--	--	--	--
Cluster-25131.0	--	--	--	--	--	--	--	--	--	--	--	--	--	--	--	--	--	--	--	--	--	--	--	--	--	--	--	--
Cluster-29767.29679	1322405424	PLY89102.1	141	2.1e-06	hypothetical protein LSAT_4X89100 [Lactuca sativa]	--	--	--	--	--	--	--	--	--	P13548	123	9.9e-06	V-type proton ATPase catalytic subunit A OS=Vigna radiata var. radiata OX=3916 PE=1 SV=3	PF15220	Hypoxia-inducible lipid droplet-associated	GO:0008284//GO:0001819//GO:0010884	positive regulation of cell population proliferation//positive regulation of cytokine production//positive regulation of lipid storage	--	--	--	--	--	--
Cluster-14060.1	--	--	--	--	--	--	--	--	--	--	--	--	--	--	--	--	--	--	--	--	--	--	--	--	--	--	--	--
Cluster-14060.0	--	--	--	--	--	--	--	--	--	--	--	--	--	--	--	--	--	--	--	--	--	--	--	--	--	--	--	--
Cluster-29767.71014	1387812187	PWA77408.1	3558	0	zinc finger, C3HC [Artemisia annua]	XM_025111338.1	XM_025111338	635	0	PREDICTED: Cynara cardunculus var. scolymus uncharacterized LOC112506977 (LOC112506977), transcript variant X2, mRNA	--	--	--	--	--	--	--	--	PF07967//PF08115	C3HC zinc finger-like//SFI toxin family	GO:0009405	pathogenesis	GO:0008270	zinc ion binding	GO:0042025//GO:0005576	host cell nucleus//extracellular region	--	--
Cluster-29767.71015	1387794796	PWA62699.1	827	2.1e-85	calcium-binding EF-hand family protein [Artemisia annua]	XM_025136096.1	XM_025136096	279	2.57e-142	PREDICTED: Cynara cardunculus var. scolymus uncharacterized LOC112525816 (LOC112525816), mRNA	--	--	--	--	--	--	--	--	PF13202//PF13405//PF13499//PF00036	EF hand//EF-hand domain//EF-hand domain pair//EF hand	--	--	GO:0005509	calcium ion binding	--	--	--	--
Cluster-29767.71016	1322387109	PLY80330.1	218	4.4e-15	hypothetical protein LSAT_7X91560 [Lactuca sativa]	XM_025112343.1	XM_025112343	82	4.23e-33	PREDICTED: Cynara cardunculus var. scolymus protein CASPARIAN STRIP INTEGRITY FACTOR 2-like (LOC112507680), mRNA	--	--	--	--	O65684	127	6e-06	Protein CASPARIAN STRIP INTEGRITY FACTOR 2 OS=Arabidopsis thaliana OX=3702 GN=CIF2 PE=1 SV=1	--	--	--	--	--	--	--	--	--	--
Cluster-29767.71017	1387764107	PWA40761.1	1290	2.2e-139	outward rectifying potassium channel protein [Artemisia annua]	XM_023896281.1	XM_023896281	373	0	PREDICTED: Lactuca sativa two-pore potassium channel 1-like (LOC111900394), transcript variant X2, mRNA	K05389	KCNKF	potassium channel subfamily K, other eukaryote	http://www.genome.jp/dbget-bin/www_bget?ko:K05389	Q8LBL1	897	3.1e-95	Two-pore potassium channel 1 OS=Arabidopsis thaliana OX=3702 GN=TPK1 PE=1 SV=2	PF13405//PF13499//PF00036//PF05656//PF00520//PF13202//PF00060	EF-hand domain//EF-hand domain pair//EF hand//Protein of unknown function (DUF805)//Ion transport protein//EF hand//Ligand-gated ion channel	GO:0006811//GO:0055085	ion transport//transmembrane transport	GO:0005509//GO:0005216//GO:0015276	calcium ion binding//ion channel activity//ligand-gated ion channel activity	GO:0016021//GO:0016020	integral component of membrane//membrane	KOG1418	Tandem pore domain K+ channel
Cluster-29767.71010	1387832169	PWA95498.1	229	1.3e-16	FAR1 DNA binding domain, Zinc finger, SWIM-type, MULE transposase domain, FHY3/FAR1 family [Artemisia annua]	--	--	--	--	--	--	--	--	--	--	--	--	--	PF00665	Integrase core domain	GO:0015074	DNA integration	--	--	--	--	--	--
Cluster-29767.71011	--	--	--	--	--	--	--	--	--	--	--	--	--	--	--	--	--	--	--	--	--	--	--	--	--	--	--	--
Cluster-29767.71012	--	--	--	--	--	--	--	--	--	--	--	--	--	--	--	--	--	--	--	--	--	--	--	--	--	--	--	--
Cluster-29767.71013	--	--	--	--	--	--	--	--	--	--	--	--	--	--	--	--	--	--	--	--	--	--	--	--	--	--	--	--
Cluster-2308.0	1137172420	OMO51648.1	276	4.3e-22	hypothetical protein CCACVL1_29664 [Corchorus capsularis]	--	--	--	--	--	--	--	--	--	Q9QYJ3	217	1.1e-16	DnaJ homolog subfamily B member 1 OS=Mus musculus OX=10090 GN=Dnajb1 PE=1 SV=3	--	--	--	--	--	--	--	--	--	--
Cluster-19867.0	--	--	--	--	--	--	--	--	--	--	--	--	--	--	--	--	--	--	--	--	--	--	--	--	--	--	--	--
Cluster-29767.71018	--	--	--	--	--	--	--	--	--	--	--	--	--	--	--	--	--	--	--	--	--	--	--	--	--	--	--	--
Cluster-29767.71019	1387803678	PWA70078.1	1701	1.3e-186	hypothetical protein CTI12_AA292190 [Artemisia annua]	XM_016687784.1	XM_016687784	37	1.16e-07	PREDICTED: Capsicum annuum UDP-glycosyltransferase 89A2 (LOC107843474), mRNA	--	--	--	--	Q9LZD8	871	8.4e-92	UDP-glycosyltransferase 89A2 OS=Arabidopsis thaliana OX=3702 GN=UGT89A2 PE=2 SV=1	PF00201	UDP-glucoronosyl and UDP-glucosyl transferase	--	--	GO:0016758	transferase activity, transferring hexosyl groups	--	--	--	--
Cluster-22565.0	--	--	--	--	--	--	--	--	--	--	--	--	--	--	--	--	--	--	PF08496//PF04647	Peptidase family S49 N-terminal//Accessory gene regulator B	GO:0009405//GO:0009372	pathogenesis//quorum sensing	GO:0004252//GO:0008233	serine-type endopeptidase activity//peptidase activity	GO:0005886//GO:0016021	plasma membrane//integral component of membrane	--	--
Cluster-29767.37193	1387764428	PWA40944.1	340	2.1e-29	hypothetical protein CTI12_AA558060 [Artemisia annua]	--	--	--	--	--	--	--	--	--	--	--	--	--	--	--	--	--	--	--	--	--	--	--
Cluster-29767.37192	--	--	--	--	--	--	--	--	--	--	--	--	--	--	--	--	--	--	--	--	--	--	--	--	--	--	--	--
Cluster-29767.37191	1387820401	PWA84694.1	581	1.2e-57	F-box domain, cyclin-like protein [Artemisia annua]	--	--	--	--	--	--	--	--	--	Q9ZWC6	270	5.3e-23	F-box protein At-B OS=Arabidopsis thaliana OX=3702 GN=ATB PE=2 SV=1	--	--	--	--	--	--	--	--	--	--
Cluster-29767.37190	--	--	--	--	--	--	--	--	--	--	--	--	--	--	--	--	--	--	--	--	--	--	--	--	--	--	--	--
Cluster-29767.37197	1387792000	PWA60442.1	1021	1.1e-107	aspartate/glutamate/uridylate kinase, Uridylate kinase, bacteria [Artemisia annua]	XM_025066482.1	XM_025066482	162	4.68e-77	PREDICTED: Ziziphus jujuba uncharacterized LOC107432001 (LOC107432001), transcript variant X2, mRNA	--	--	--	--	Q7VD61	368	2.2e-33	Uridylate kinase OS=Prochlorococcus marinus (strain SARG / CCMP1375 / SS120) OX=167539 GN=pyrH PE=3 SV=1	PF03367//PF04504	ZPR1 zinc-finger domain//Protein of unknown function, DUF573	GO:0006355	regulation of transcription, DNA-templated	GO:0008270	zinc ion binding	--	--	--	--
Cluster-29767.37196	1035961166	OAY81951.1	181	1.4e-10	60S ribosomal protein L8 [Ananas comosus]	XM_022183770.1	XM_022183770	82	6.79e-33	PREDICTED: Helianthus annuus 60S ribosomal protein L8 (LOC110942071), mRNA	K02938	RP-L8e, RPL8	large subunit ribosomal protein L8e	http://www.genome.jp/dbget-bin/www_bget?ko:K02938	Q42064	179	8.9e-12	60S ribosomal protein L8-3 OS=Arabidopsis thaliana OX=3702 GN=RPL8C PE=2 SV=2	PF03947	Ribosomal Proteins L2, C-terminal domain	GO:0042254//GO:0006412	ribosome biogenesis//translation	GO:0003735	structural constituent of ribosome	GO:0005840	ribosome	KOG2309	60s ribosomal protein L2/L8
Cluster-26392.0	--	--	--	--	--	--	--	--	--	--	--	--	--	--	--	--	--	--	--	--	--	--	--	--	--	--	--	--
Cluster-29767.30687	--	--	--	--	--	--	--	--	--	--	--	--	--	--	--	--	--	--	PF07127	Late nodulin protein	GO:0009878	nodule morphogenesis	GO:0046872	metal ion binding	--	--	--	--
Cluster-27630.0	1389792832	XP_024994649.1	1885	4e-208	indole-3-pyruvate monooxygenase YUCCA6-like [Cynara cardunculus var. scolymus]	XM_022149917.1	XM_022149917	727	0	PREDICTED: Helianthus annuus indole-3-pyruvate monooxygenase YUCCA6-like (LOC110904100), mRNA	K11816	YUCCA	indole-3-pyruvate monooxygenase	http://www.genome.jp/dbget-bin/www_bget?ko:K11816	Q8VZ59	1438	1e-157	Indole-3-pyruvate monooxygenase YUCCA6 OS=Arabidopsis thaliana OX=3702 GN=YUC6 PE=1 SV=1	PF01593//PF02789//PF01494//PF00743//PF01266//PF07992	Flavin containing amine oxidoreductase//Cytosol aminopeptidase family, N-terminal domain//FAD binding domain//Flavin-binding monooxygenase-like//FAD dependent oxidoreductase//Pyridine nucleotide-disulphide oxidoreductase	GO:0055114//GO:0006508	oxidation-reduction process//proteolysis	GO:0050661//GO:0050660//GO:0004177//GO:0071949//GO:0004499//GO:0016491	NADP binding//flavin adenine dinucleotide binding//aminopeptidase activity//FAD binding//N,N-dimethylaniline monooxygenase activity//oxidoreductase activity	--	--	--	--
Cluster-29767.37199	1387754500	PWA36199.1	365	1.6e-32	protein kinase-like domain, Concanavalin A-like lectin/glucanase domain protein [Artemisia annua]	--	--	--	--	--	K04733	IRAK4	interleukin-1 receptor-associated kinase 4	http://www.genome.jp/dbget-bin/www_bget?ko:K04733	--	--	--	--	--	--	--	--	--	--	--	--	--	--
Cluster-29767.37198	1389794964	XP_024995711.1	2046	8.6e-227	cationic amino acid transporter 9, chloroplastic-like [Cynara cardunculus var. scolymus]	XM_025139943.1	XM_025139943	990	0	PREDICTED: Cynara cardunculus var. scolymus cationic amino acid transporter 9, chloroplastic-like (LOC112528910), mRNA	K03294	TC.APA	basic amino acid/polyamine antiporter, APA family	http://www.genome.jp/dbget-bin/www_bget?ko:K03294	Q9C5D6	1513	2.1e-166	Cationic amino acid transporter 9, chloroplastic OS=Arabidopsis thaliana OX=3702 GN=CAT9 PE=2 SV=1	PF00324//PF13520//PF03845	Amino acid permease//Amino acid permease//Spore germination protein	GO:0055085//GO:0009847	transmembrane transport//spore germination	GO:0022857	transmembrane transporter activity	GO:0016020//GO:0016021	membrane//integral component of membrane	KOG1286	Amino acid transporters
Cluster-7672.0	--	--	--	--	--	--	--	--	--	--	--	--	--	--	--	--	--	--	--	--	--	--	--	--	--	--	--	--
Cluster-11518.0	--	--	--	--	--	--	--	--	--	--	--	--	--	--	--	--	--	--	--	--	--	--	--	--	--	--	--	--
Cluster-27302.0	1387823156	PWA87185.1	619	1.1e-61	hypothetical protein CTI12_AA064120 [Artemisia annua]	--	--	--	--	--	--	--	--	--	--	--	--	--	--	--	--	--	--	--	--	--	--	--
Cluster-5603.0	604344842	EYU43516.1	206	5.7e-14	hypothetical protein MIMGU_mgv1a006152mg [Erythranthe guttata]	--	--	--	--	--	K07542	PIGV	phosphatidylinositol glycan, class V	http://www.genome.jp/dbget-bin/www_bget?ko:K07542	P0CP62	228	6.1e-18	GPI mannosyltransferase 2 OS=Cryptococcus neoformans var. neoformans serotype D (strain JEC21 / ATCC MYA-565) OX=214684 GN=GPI18 PE=3 SV=1	PF04188	Mannosyltransferase (PIG-V)	GO:0006506	GPI anchor biosynthetic process	GO:0004584	obsolete dolichyl-phosphate-mannose-glycolipid alpha-mannosyltransferase activity	GO:0000136	alpha-1,6-mannosyltransferase complex	KOG2647	Predicted Dolichyl-phosphate-mannose-protein mannosyltransferase
Cluster-14043.0	1387792539	PWA60869.1	597	2e-59	zinc knuckle CX2CX4HX4C [Artemisia annua]	--	--	--	--	--	--	--	--	--	--	--	--	--	--	--	--	--	--	--	--	--	--	--
Cluster-1752.0	--	--	--	--	--	XM_018388970.1	XM_018388970	287	1.3e-147	Fusarium oxysporum f. sp. lycopersici 4287 hypothetical protein partial mRNA	--	--	--	--	--	--	--	--	PF12409	P5-type ATPase cation transporter	GO:0006812	cation transport	GO:0016887	ATPase activity	GO:0016021	integral component of membrane	--	--
Cluster-27283.0	--	--	--	--	--	--	--	--	--	--	--	--	--	--	--	--	--	--	--	--	--	--	--	--	--	--	--	--
Cluster-29767.25555	1387780013	PWA51306.1	1051	1.9e-111	ABC transporter of the mitochondrion 1 [Artemisia annua]	XM_025120096.1	XM_025120096	189	2.31e-92	PREDICTED: Cynara cardunculus var. scolymus ABC transporter B family member 25, mitochondrial-like (LOC112513744), mRNA	K05663	ABC.ATM	mitochondrial ABC transporter ATM	http://www.genome.jp/dbget-bin/www_bget?ko:K05663	Q9LVM1	438	8.5e-42	ABC transporter B family member 25, mitochondrial OS=Arabidopsis thaliana OX=3702 GN=ABCB25 PE=1 SV=1	PF03358	NADPH-dependent FMN reductase	--	--	GO:0016491	oxidoreductase activity	--	--	KOG0057	Mitochondrial Fe/S cluster exporter, ABC superfamily
Cluster-29767.97766	1387818425	PWA82928.1	153	4.8e-08	hypothetical protein CTI12_AA174420 [Artemisia annua]	--	--	--	--	--	--	--	--	--	--	--	--	--	--	--	--	--	--	--	--	--	--	--
Cluster-29767.97767	1387761276	PWA39209.1	1757	2.3e-193	cyclin-like protein [Artemisia annua]	AY063461.1	AY063461	511	0	Helianthus tuberosus cyclin D3 (CycD3;1) mRNA, complete cds	K14505	CYCD3	cyclin D3, plant	http://www.genome.jp/dbget-bin/www_bget?ko:K14505	P42753	766	7.1e-80	Cyclin-D3-1 OS=Arabidopsis thaliana OX=3702 GN=CYCD3-1 PE=1 SV=3	PF02984	Cyclin, C-terminal domain	--	--	--	--	GO:0042025	host cell nucleus	--	--
Cluster-29767.97764	--	--	--	--	--	--	--	--	--	--	--	--	--	--	--	--	--	--	--	--	--	--	--	--	--	--	--	--
Cluster-29767.97765	--	--	--	--	--	--	--	--	--	--	--	--	--	--	--	--	--	--	--	--	--	--	--	--	--	--	--	--
Cluster-29767.97762	--	--	--	--	--	--	--	--	--	--	K10843	ERCC3, XPB	DNA excision repair protein ERCC-3	http://www.genome.jp/dbget-bin/www_bget?ko:K10843	Q38861	126	4.3e-06	General transcription and DNA repair factor IIH helicase subunit XPB1 OS=Arabidopsis thaliana OX=3702 GN=XPB1 PE=2 SV=3	--	--	--	--	--	--	--	--	--	--
Cluster-29767.97763	--	--	--	--	--	KP332290.1	KP332290	62	4.16e-22	Chrysanthemum x morifolium microsatellite JH-450 sequence	--	--	--	--	--	--	--	--	--	--	--	--	--	--	--	--	--	--
Cluster-29767.97760	1079428816	XP_018508936.1	217	7.1e-15	PREDICTED: transcription initiation factor TFIID subunit 15-like [Brassica rapa]	XM_025137708.1	XM_025137708	176	2.91e-85	PREDICTED: Cynara cardunculus var. scolymus transcription initiation factor TFIID subunit 15 (LOC112527224), transcript variant X3, mRNA	--	--	--	--	Q9AST1	212	1e-15	Transcription initiation factor TFIID subunit 15 OS=Arabidopsis thaliana OX=3702 GN=TAF15 PE=1 SV=1	--	--	--	--	--	--	--	--	--	--
Cluster-29767.97761	1387799518	PWA66604.1	192	1e-11	hypothetical protein CTI12_AA325040 [Artemisia annua]	XM_025116881.1	XM_025116881	67	2.13e-24	PREDICTED: Cynara cardunculus var. scolymus GPN-loop GTPase QQT2 (LOC112511303), transcript variant X7, mRNA	K06883	K06883	uncharacterized protein	http://www.genome.jp/dbget-bin/www_bget?ko:K06883	--	--	--	--	PF03205//PF01580//PF00503//PF01637	Molybdopterin guanine dinucleotide synthesis protein B//FtsK/SpoIIIE family//G-protein alpha subunit//ATPase domain predominantly from Archaea	GO:0007186//GO:0006777	G protein-coupled receptor signaling pathway//Mo-molybdopterin cofactor biosynthetic process	GO:0003924//GO:0003677//GO:0000166//GO:0031683//GO:0005524//GO:0005525//GO:0019001	GTPase activity//DNA binding//nucleotide binding//G-protein beta/gamma-subunit complex binding//ATP binding//GTP binding//guanyl nucleotide binding	--	--	--	--
Cluster-683.0	--	--	--	--	--	XM_018376595.1	XM_018376595	390	0	Fusarium oxysporum f. sp. lycopersici 4287 hypothetical protein mRNA	--	--	--	--	--	--	--	--	--	--	--	--	--	--	--	--	--	--
Cluster-29767.97768	--	--	--	--	--	--	--	--	--	--	--	--	--	--	--	--	--	--	--	--	--	--	--	--	--	--	--	--
Cluster-29767.97769	1387804380	PWA70673.1	251	3.5e-19	protein kinase [Artemisia annua]	--	--	--	--	--	--	--	--	--	--	--	--	--	--	--	--	--	--	--	--	--	--	--
Cluster-29767.14235	--	--	--	--	--	--	--	--	--	--	--	--	--	--	--	--	--	--	--	--	--	--	--	--	--	--	--	--
Cluster-24679.0	1322389282	PLY81325.1	621	6e-62	hypothetical protein LSAT_4X25081 [Lactuca sativa]	XM_023913453.1	XM_023913453	222	4.55e-111	PREDICTED: Lactuca sativa cytochrome P450 CYP749A22-like (LOC111917810), mRNA	--	--	--	--	H2DH17	465	2.8e-45	Cytochrome P450 CYP749A22 OS=Panax ginseng OX=4054 PE=2 SV=1	PF00067	Cytochrome P450	GO:0055114	oxidation-reduction process	GO:0016705//GO:0020037//GO:0005506	oxidoreductase activity, acting on paired donors, with incorporation or reduction of molecular oxygen//heme binding//iron ion binding	--	--	--	--
Cluster-29767.26164	1387798497	PWA65752.1	306	1.2e-25	NMD3-like protein [Artemisia annua]	--	--	--	--	--	K07562	NMD3	nonsense-mediated mRNA decay protein 3	http://www.genome.jp/dbget-bin/www_bget?ko:K07562	Q55BF2	197	2e-14	60S ribosomal export protein NMD3 OS=Dictyostelium discoideum OX=44689 GN=nmd3 PE=3 SV=1	--	--	--	--	--	--	--	--	KOG2613	NMD protein affecting ribosome stability and mRNA decay
Cluster-29767.26165	1387799832	PWA66870.1	298	1e-24	zinc finger, PHD-type [Artemisia annua]	--	--	--	--	--	--	--	--	--	--	--	--	--	PF00130	Phorbol esters/diacylglycerol binding domain (C1 domain)	GO:0035556	intracellular signal transduction	--	--	--	--	--	--
Cluster-29767.76549	--	--	--	--	--	--	--	--	--	--	--	--	--	--	--	--	--	--	--	--	--	--	--	--	--	--	--	--
Cluster-29767.76548	--	--	--	--	--	--	--	--	--	--	--	--	--	--	--	--	--	--	--	--	--	--	--	--	--	--	--	--
Cluster-29767.26160	--	--	--	--	--	--	--	--	--	--	--	--	--	--	--	--	--	--	--	--	--	--	--	--	--	--	--	--
Cluster-29767.26161	1387836364	PWA99473.1	220	2.4e-15	plastid transcriptionally active 14 [Artemisia annua]	--	--	--	--	--	--	--	--	--	Q84JF5	148	2e-08	Protein PLASTID TRANSCRIPTIONALLY ACTIVE 14 OS=Arabidopsis thaliana OX=3702 GN=PTAC14 PE=1 SV=1	--	--	--	--	--	--	--	--	--	--
Cluster-29767.26162	--	--	--	--	--	--	--	--	--	--	--	--	--	--	--	--	--	--	--	--	--	--	--	--	--	--	--	--
Cluster-20085.0	--	--	--	--	--	--	--	--	--	--	--	--	--	--	--	--	--	--	--	--	--	--	--	--	--	--	--	--
Cluster-29767.76543	1228923595	XP_022012141.1	793	2.8e-81	uncharacterized protein At5g01610-like [Helianthus annuus]	XM_022156449.1	XM_022156449	371	0	PREDICTED: Helianthus annuus uncharacterized protein At5g01610-like (LOC110911795), mRNA	--	--	--	--	Q9M015	381	6.2e-35	Uncharacterized protein At5g01610 OS=Arabidopsis thaliana OX=3702 GN=At5g01610 PE=1 SV=1	--	--	--	--	--	--	--	--	--	--
Cluster-30226.0	--	--	--	--	--	--	--	--	--	--	--	--	--	--	--	--	--	--	--	--	--	--	--	--	--	--	--	--
Cluster-29767.76541	1387794882	PWA62764.1	322	2.1e-27	trihelix transcription factor ASIL2 [Artemisia annua]	--	--	--	--	--	--	--	--	--	Q9SYG2	161	3.7e-10	Trihelix transcription factor ASIL1 OS=Arabidopsis thaliana OX=3702 GN=ASIL1 PE=1 SV=1	PF04504	Protein of unknown function, DUF573	GO:0006355	regulation of transcription, DNA-templated	--	--	--	--	--	--
Cluster-4354.0	1217001195	XP_021639942.1	178	1.6e-10	homocysteine S-methyltransferase 1-like isoform X2 [Hevea brasiliensis]	--	--	--	--	--	K00547	mmuM, BHMT2	homocysteine S-methyltransferase	http://www.genome.jp/dbget-bin/www_bget?ko:K00547	O35490	1646	3.7e-182	Betaine--homocysteine S-methyltransferase 1 OS=Mus musculus OX=10090 GN=Bhmt PE=1 SV=1	--	--	--	--	--	--	--	--	--	--
Cluster-29767.76547	1387807922	PWA73706.1	188	1.4e-11	Leucine-rich repeat-containing protein [Artemisia annua]	--	--	--	--	--	--	--	--	--	--	--	--	--	--	--	--	--	--	--	--	--	--	--
Cluster-29767.76546	--	--	--	--	--	--	--	--	--	--	--	--	--	--	--	--	--	--	PF00181//PF02189//PF02894	Ribosomal Proteins L2, RNA binding domain//Immunoreceptor tyrosine-based activation motif//Oxidoreductase family, C-terminal alpha/beta domain	GO:0042254//GO:0055114//GO:0006412//GO:0007165//GO:0007166	ribosome biogenesis//oxidation-reduction process//translation//signal transduction//cell surface receptor signaling pathway	GO:0004888//GO:0003735//GO:0016491	transmembrane signaling receptor activity//structural constituent of ribosome//oxidoreductase activity	GO:0005840//GO:0016020	ribosome//membrane	--	--
Cluster-29767.76545	--	--	--	--	--	--	--	--	--	--	--	--	--	--	--	--	--	--	--	--	--	--	--	--	--	--	--	--
Cluster-29767.76544	--	--	--	--	--	XM_022120721.1	XM_022120721	42	6.13e-11	PREDICTED: Helianthus annuus ankyrin repeat-containing protein At2g01680 (LOC110871951), mRNA	--	--	--	--	--	--	--	--	--	--	--	--	--	--	--	--	--	--
Cluster-17198.0	--	--	--	--	--	--	--	--	--	--	--	--	--	--	--	--	--	--	--	--	--	--	--	--	--	--	--	--
Cluster-17198.1	--	--	--	--	--	--	--	--	--	--	--	--	--	--	--	--	--	--	--	--	--	--	--	--	--	--	--	--
Cluster-25981.0	--	--	--	--	--	--	--	--	--	--	--	--	--	--	--	--	--	--	--	--	--	--	--	--	--	--	--	--
Cluster-18591.0	1387783454	PWA53828.1	220	1.2e-15	gypsy/Ty-3 retroelement polyprotein [Artemisia annua]	--	--	--	--	--	--	--	--	--	--	--	--	--	PF08072	BDHCT (NUC031) domain	GO:0006260	DNA replication	GO:0005524//GO:0016818//GO:0003677	ATP binding//hydrolase activity, acting on acid anhydrides, in phosphorus-containing anhydrides//DNA binding	GO:0005634	nucleus	--	--
Cluster-29767.38291	1387813698	PWA78740.1	257	8.9e-20	mechanosensitive ion channel MscS, LSM domain protein [Artemisia annua]	--	--	--	--	--	--	--	--	--	--	--	--	--	--	--	--	--	--	--	--	--	--	--
Cluster-29767.23368	--	--	--	--	--	MH129026.1	MH129026	46	5.44e-13	Aphyllon epigalium subsp. epigalium mitochondrion, partial genome	--	--	--	--	--	--	--	--	--	--	--	--	--	--	--	--	--	--
Cluster-29767.38417	1387818324	PWA82840.1	321	6.4e-27	hypothetical protein CTI12_AA041290 [Artemisia annua]	XM_023872817.1	XM_023872817	64	5.49e-23	PREDICTED: Lactuca sativa uncharacterized LOC111876264 (LOC111876264), transcript variant X2, mRNA	--	--	--	--	--	--	--	--	--	--	--	--	--	--	--	--	--	--
Cluster-29767.38416	1340500454	XP_023731300.1	650	8.7e-65	26S proteasome non-ATPase regulatory subunit 10 [Lactuca sativa]	XM_025139408.1	XM_025139408	295	4.1e-151	PREDICTED: Cynara cardunculus var. scolymus 26S proteasome non-ATPase regulatory subunit 10 (LOC112528389), mRNA	K06694	PSMD10	26S proteasome non-ATPase regulatory subunit 10	http://www.genome.jp/dbget-bin/www_bget?ko:K06694	Q6PFX9	215	9.2e-16	Poly [ADP-ribose] polymerase tankyrase-1 OS=Mus musculus OX=10090 GN=Tnks PE=1 SV=1	PF13606//PF00023	Ankyrin repeat//Ankyrin repeat	--	--	GO:0005515	protein binding	--	--	KOG4177	Ankyrin
Cluster-29767.38415	--	--	--	--	--	--	--	--	--	--	--	--	--	--	--	--	--	--	--	--	--	--	--	--	--	--	--	--
Cluster-29767.23609	1387823933	PWA87891.1	381	4.1e-34	RNA-directed DNA polymerase, eukaryota, Reverse transcriptase zinc-binding domain protein [Artemisia annua]	--	--	--	--	--	--	--	--	--	--	--	--	--	--	--	--	--	--	--	--	--	--	--
Cluster-29767.38413	--	--	--	--	--	--	--	--	--	--	--	--	--	--	--	--	--	--	--	--	--	--	--	--	--	--	--	--
Cluster-29767.38412	1387766293	PWA42044.1	419	4.4e-38	rmlC-like jelly roll fold protein [Artemisia annua]	--	--	--	--	--	K06995	K06995	uncharacterized protein	http://www.genome.jp/dbget-bin/www_bget?ko:K06995	--	--	--	--	--	--	--	--	--	--	--	--	--	--
Cluster-29767.38411	1387790747	PWA59456.1	687	1.4e-69	hypothetical protein CTI12_AA391380 [Artemisia annua]	XM_025130514.1	XM_025130514	257	1.72e-130	PREDICTED: Cynara cardunculus var. scolymus transcription factor bHLH130-like (LOC112521576), transcript variant X2, mRNA	--	--	--	--	Q66GR3	394	5.1e-37	Transcription factor bHLH130 OS=Arabidopsis thaliana OX=3702 GN=BHLH130 PE=1 SV=1	PF00010	Helix-loop-helix DNA-binding domain	--	--	GO:0046983	protein dimerization activity	--	--	--	--
Cluster-29767.38410	--	--	--	--	--	XM_025136875.1	XM_025136875	56	4.6e-19	PREDICTED: Cynara cardunculus var. scolymus transmembrane protein 120 homolog (LOC112526546), transcript variant X2, mRNA	--	--	--	--	--	--	--	--	PF07851	TMPIT-like protein	--	--	--	--	GO:0016021	integral component of membrane	--	--
Cluster-29767.23602	--	--	--	--	--	--	--	--	--	--	--	--	--	--	--	--	--	--	--	--	--	--	--	--	--	--	--	--
Cluster-29767.23603	--	--	--	--	--	--	--	--	--	--	--	--	--	--	--	--	--	--	--	--	--	--	--	--	--	--	--	--
Cluster-29767.23600	1269937435	XP_022717996.1	139	3.2e-06	uncharacterized protein LOC111276519 [Durio zibethinus]	--	--	--	--	--	--	--	--	--	--	--	--	--	--	--	--	--	--	--	--	--	--	--
Cluster-29767.23601	--	--	--	--	--	--	--	--	--	--	--	--	--	--	--	--	--	--	--	--	--	--	--	--	--	--	--	--
Cluster-29767.23606	1387754537	PWA36211.1	594	6.2e-59	ribosomal protein L25/Gln-tRNA synthetase, anti-codon-binding domain-containing protein [Artemisia annua]	XM_022157190.1	XM_022157190	112	4.84e-50	PREDICTED: Helianthus annuus 50S ribosomal protein L25 (LOC110912467), mRNA	K02897	RP-L25, rplY	large subunit ribosomal protein L25	http://www.genome.jp/dbget-bin/www_bget?ko:K02897	--	--	--	--	PF01386	Ribosomal L25p family	GO:0006412//GO:0042254	translation//ribosome biogenesis	GO:0008097//GO:0003735	5S rRNA binding//structural constituent of ribosome	GO:0005840	ribosome	--	--
Cluster-29767.23607	--	--	--	--	--	--	--	--	--	--	--	--	--	--	--	--	--	--	--	--	--	--	--	--	--	--	--	--
Cluster-29767.38419	1387834092	PWA97312.1	167	9.9e-10	PGG domain-containing protein [Artemisia annua]	--	--	--	--	--	--	--	--	--	--	--	--	--	--	--	--	--	--	--	--	--	--	--
Cluster-29767.23605	1387767242	PWA42621.1	352	6.8e-31	phospholipase-like protein [Artemisia annua]	--	--	--	--	--	--	--	--	--	--	--	--	--	PF01791//PF00610//PF00564	DeoC/LacD family aldolase//Domain found in Dishevelled, Egl-10, and Pleckstrin (DEP)//PB1 domain	GO:0035556	intracellular signal transduction	GO:0005515//GO:0016829	protein binding//lyase activity	--	--	--	--
Cluster-29767.99908	--	--	--	--	--	--	--	--	--	--	--	--	--	--	--	--	--	--	--	--	--	--	--	--	--	--	--	--
Cluster-29767.27866	1387751955	PWA35307.1	371	1.1e-32	hypothetical protein CTI12_AA610700 [Artemisia annua]	--	--	--	--	--	--	--	--	--	--	--	--	--	--	--	--	--	--	--	--	--	--	--
Cluster-8620.1	1387759937	PWA38550.1	308	8.3e-26	SWIB/MDM2 domain superfamily protein [Artemisia annua]	--	--	--	--	--	--	--	--	--	--	--	--	--	--	--	--	--	--	--	--	--	--	--
Cluster-8620.0	--	--	--	--	--	--	--	--	--	--	--	--	--	--	--	--	--	--	--	--	--	--	--	--	--	--	--	--
Cluster-14738.0	1344050746	XP_023908577.1	253	1.4e-19	pescadillo homolog [Quercus suber]	XM_018377726.1	XM_018377726	414	0	Fusarium oxysporum f. sp. lycopersici 4287 hypothetical protein mRNA	K14843	PES1, NOP7	pescadillo	http://www.genome.jp/dbget-bin/www_bget?ko:K14843	Q2HCV1	320	9e-29	Pescadillo homolog OS=Chaetomium globosum (strain ATCC 6205 / CBS 148.51 / DSM 1962 / NBRC 6347 / NRRL 1970) OX=306901 GN=NOP7 PE=3 SV=1	--	--	--	--	--	--	--	--	KOG2481	Protein required for normal rRNA processing
Cluster-11368.0	--	--	--	--	--	--	--	--	--	--	--	--	--	--	--	--	--	--	--	--	--	--	--	--	--	--	--	--
Cluster-2789.0	1344043036	XP_023901447.1	391	1.4e-35	ribosome-associated molecular chaperone SSB1 [Quercus suber]	XM_016416243.1	XM_016416243	280	1.22e-143	Rhodotorula toruloides NP11 heat shock 70kDa protein 1/8 partial mRNA	K09490	HSPA5, BIP	heat shock 70kDa protein 5	http://www.genome.jp/dbget-bin/www_bget?ko:K09490	Q10284	493	7.7e-49	Ribosome-associated molecular chaperone sks2 OS=Schizosaccharomyces pombe (strain 972 / ATCC 24843) OX=284812 GN=sks2 PE=1 SV=2	--	--	--	--	--	--	--	--	KOG0101	Molecular chaperones HSP70/HSC70, HSP70 superfamily
Cluster-11719.0	--	--	--	--	--	--	--	--	--	--	--	--	--	--	--	--	--	--	--	--	--	--	--	--	--	--	--	--
Cluster-29767.23362	--	--	--	--	--	--	--	--	--	--	--	--	--	--	--	--	--	--	--	--	--	--	--	--	--	--	--	--
Cluster-29767.52860	1322376930	PLY75200.1	689	1.2e-69	hypothetical protein LSAT_2X125840 [Lactuca sativa]	--	--	--	--	--	--	--	--	--	Q39635	469	1.5e-45	Uncharacterized 38.1 kDa protein OS=Capnoides sempervirens OX=3464 PE=2 SV=1	--	--	--	--	--	--	--	--	--	--
Cluster-29767.72734	--	--	--	--	--	--	--	--	--	--	--	--	--	--	--	--	--	--	--	--	--	--	--	--	--	--	--	--
Cluster-29767.72735	422898324	BAM67028.1	187	1.5e-11	late elongated hypocotyl-like [Chrysanthemum seticuspe f. boreale]	--	--	--	--	--	--	--	--	--	--	--	--	--	--	--	--	--	--	--	--	--	--	--
Cluster-29767.72736	1387806352	PWA72358.1	506	9.1e-49	hypothetical protein CTI12_AA271390 [Artemisia annua]	--	--	--	--	--	--	--	--	--	--	--	--	--	--	--	--	--	--	--	--	--	--	--
Cluster-29767.72737	1387806351	PWA72357.1	592	2.3e-58	hypothetical protein CTI12_AA271380 [Artemisia annua]	XM_025126718.1	XM_025126718	188	6.22e-92	PREDICTED: Cynara cardunculus var. scolymus solute carrier family 35 member F1-like (LOC112518926), mRNA	K15287	SLC35F1_2	solute carrier family 35, member F1/2	http://www.genome.jp/dbget-bin/www_bget?ko:K15287	O59785	190	3.7e-13	Uncharacterized solute carrier family 35 member C320.08 OS=Schizosaccharomyces pombe (strain 972 / ATCC 24843) OX=284812 GN=SPCC320.08 PE=1 SV=1	PF06027//PF00892	Solute carrier family 35//EamA-like transporter family	GO:0055085	transmembrane transport	GO:0022857	transmembrane transporter activity	GO:0016021//GO:0016020	integral component of membrane//membrane	KOG2766	Predicted membrane protein
Cluster-29767.72730	1387823913	PWA87873.1	1341	7.2e-145	F-box domain-containing protein [Artemisia annua]	--	--	--	--	--	--	--	--	--	Q8GXC7	237	2.8e-18	F-box/kelch-repeat protein At3g06240 OS=Arabidopsis thaliana OX=3702 GN=At3g06240 PE=2 SV=1	PF11712//PF12937//PF13456//PF00646	Endoplasmic reticulum-based factor for assembly of V-ATPase//F-box-like//Reverse transcriptase-like//F-box domain	GO:0051252//GO:0070072	regulation of RNA metabolic process//vacuolar proton-transporting V-type ATPase complex assembly	GO:0005515//GO:0004523//GO:0003676	protein binding//RNA-DNA hybrid ribonuclease activity//nucleic acid binding	--	--	--	--
Cluster-29767.72731	1387805819	PWA71911.1	3808	0	smg8/Smg9 [Artemisia annua]	XM_022138662.1	XM_022138662	423	0	PREDICTED: Helianthus annuus uncharacterized LOC110891003 (LOC110891003), mRNA	K18734	SMG8	protein SMG8	http://www.genome.jp/dbget-bin/www_bget?ko:K18734	Q0VA04	247	2.4e-19	Protein smg8 OS=Xenopus tropicalis OX=8364 GN=smg8 PE=2 SV=1	PF08515//PF10220	Transforming growth factor beta type I GS-motif//Smg8_Smg9	GO:0016310//GO:0000184//GO:0007178//GO:0009069//GO:0006468	phosphorylation//nuclear-transcribed mRNA catabolic process, nonsense-mediated decay//transmembrane receptor protein serine/threonine kinase signaling pathway//serine family amino acid metabolic process//protein phosphorylation	GO:0004675//GO:0005524	transmembrane receptor protein serine/threonine kinase activity//ATP binding	GO:0016020	membrane	--	--
Cluster-29767.72732	1387762535	PWA39873.1	1244	8.1e-134	phosphoenolpyruvate carboxylase-related kinase 2 [Artemisia annua]	XM_022164636.1	XM_022164636	416	0	PREDICTED: Helianthus annuus serine/threonine-protein kinase PEPKR2-like (LOC110920415), transcript variant X2, mRNA	--	--	--	--	Q8W490	810	6.5e-85	Serine/threonine-protein kinase PEPKR2 OS=Arabidopsis thaliana OX=3702 GN=PEPKR2 PE=2 SV=1	PF02127//PF00069//PF07714	Aminopeptidase I zinc metalloprotease (M18)//Protein kinase domain//Protein tyrosine and serine/threonine kinase	GO:0006508//GO:0006468	proteolysis//protein phosphorylation	GO:0004672//GO:0004177//GO:0005524//GO:0008270	protein kinase activity//aminopeptidase activity//ATP binding//zinc ion binding	--	--	--	--
Cluster-29239.0	1228808305	XP_022037337.1	1088	5e-116	protein NRT1/ PTR FAMILY 8.2-like [Helianthus annuus]	XM_022181645.1	XM_022181645	398	0	PREDICTED: Helianthus annuus protein NRT1/ PTR FAMILY 8.2-like (LOC110940084), mRNA	K14638	SLC15A3_4, PHT	solute carrier family 15 (peptide/histidine transporter), member 3/4	http://www.genome.jp/dbget-bin/www_bget?ko:K14638	Q9M390	786	2e-82	Protein NRT1/ PTR FAMILY 8.1 OS=Arabidopsis thaliana OX=3702 GN=NPF8.1 PE=1 SV=1	PF00854	POT family	GO:0055085	transmembrane transport	GO:0022857	transmembrane transporter activity	GO:0016020	membrane	--	--
Cluster-13286.0	--	--	--	--	--	--	--	--	--	--	--	--	--	--	--	--	--	--	--	--	--	--	--	--	--	--	--	--
Cluster-29767.53880	1387836212	PWA99326.1	509	3.2e-49	F-box family protein [Artemisia annua]	--	--	--	--	--	--	--	--	--	Q9C626	295	7.9e-26	F-box protein At1g47056 OS=Arabidopsis thaliana OX=3702 GN=At1g47056 PE=2 SV=1	PF13516	Leucine Rich repeat	--	--	GO:0005515	protein binding	--	--	--	--
Cluster-3420.0	--	--	--	--	--	--	--	--	--	--	--	--	--	--	--	--	--	--	--	--	--	--	--	--	--	--	--	--
Cluster-29767.72739	1389752006	XP_024991933.1	1263	2.3e-136	pleiotropic drug resistance protein 2-like isoform X3 [Cynara cardunculus var. scolymus]	XM_025136165.1	XM_025136165	547	0	PREDICTED: Cynara cardunculus var. scolymus pleiotropic drug resistance protein 2-like (LOC112525854), transcript variant X3, mRNA	--	--	--	--	Q2PCF1	1096	2e-118	Pleiotropic drug resistance protein 2 OS=Nicotiana plumbaginifolia OX=4092 GN=PDR2 PE=2 SV=1	PF01061	ABC-2 type transporter	--	--	--	--	GO:0016020	membrane	--	--
Cluster-25640.0	--	--	--	--	--	--	--	--	--	--	--	--	--	--	--	--	--	--	--	--	--	--	--	--	--	--	--	--
Cluster-29767.11250	--	--	--	--	--	--	--	--	--	--	--	--	--	--	--	--	--	--	--	--	--	--	--	--	--	--	--	--
Cluster-29767.11251	--	--	--	--	--	XM_020723687.1	XM_020723687	44	2.92e-12	PREDICTED: Phalaenopsis equestris clustered mitochondria protein (LOC110023996), transcript variant X3, mRNA	--	--	--	--	--	--	--	--	--	--	--	--	--	--	--	--	--	--
Cluster-29767.11252	--	--	--	--	--	--	--	--	--	--	--	--	--	--	--	--	--	--	--	--	--	--	--	--	--	--	--	--
Cluster-29767.11253	1387830808	PWA94226.1	633	1.6e-63	hypothetical protein CTI12_AA060390 [Artemisia annua]	HG975448.1	HG975448	43	9.71e-12	Solanum pennellii chromosome ch09, complete genome	--	--	--	--	--	--	--	--	--	--	--	--	--	--	--	--	--	--
Cluster-29767.11254	1387834558	PWA97752.1	1904	2.6e-210	hypothetical protein CTI12_AA026280 [Artemisia annua]	XM_025139913.1	XM_025139913	233	9.09e-117	PREDICTED: Cynara cardunculus var. scolymus general transcriptional corepressor trfA-like (LOC112528865), mRNA	--	--	--	--	--	--	--	--	--	--	--	--	--	--	--	--	--	--
Cluster-29767.11255	--	--	--	--	--	--	--	--	--	--	--	--	--	--	--	--	--	--	--	--	--	--	--	--	--	--	--	--
Cluster-29767.11256	1387765792	PWA41744.1	1663	1e-182	hypothetical protein CTI12_AA551140 [Artemisia annua]	XM_022143487.1	XM_022143487	426	0	PREDICTED: Helianthus annuus uncharacterized protein At4g15970-like (LOC110896058), mRNA	--	--	--	--	P0C042	756	5.9e-79	Uncharacterized protein At4g15970 OS=Arabidopsis thaliana OX=3702 GN=At4g15970 PE=2 SV=1	PF10476	Protein of unknown function C-terminus (DUF2448)	--	--	--	--	GO:0005639	integral component of nuclear inner membrane	--	--
Cluster-29767.11257	1387765792	PWA41744.1	523	9.7e-51	hypothetical protein CTI12_AA551140 [Artemisia annua]	XM_022143487.1	XM_022143487	160	9.16e-77	PREDICTED: Helianthus annuus uncharacterized protein At4g15970-like (LOC110896058), mRNA	--	--	--	--	P0C042	230	3.5e-18	Uncharacterized protein At4g15970 OS=Arabidopsis thaliana OX=3702 GN=At4g15970 PE=2 SV=1	PF15247//PF04706	Histone RNA hairpin-binding protein RNA-binding domain//Dickkopf N-terminal cysteine-rich region	GO:0030178//GO:0007275	negative regulation of Wnt signaling pathway//multicellular organism development	GO:0003723	RNA binding	GO:0005576	extracellular region	--	--
Cluster-29767.25604	--	--	--	--	--	MG255756.1	MG255756	34	1.43e-06	Forsythia x intermedia voucher G. Besnard, sn [MPU] chloroplast, complete genome	--	--	--	--	--	--	--	--	--	--	--	--	--	--	--	--	--	--
Cluster-29767.25605	--	--	--	--	--	--	--	--	--	--	--	--	--	--	--	--	--	--	--	--	--	--	--	--	--	--	--	--
Cluster-29767.25606	--	--	--	--	--	--	--	--	--	--	--	--	--	--	--	--	--	--	--	--	--	--	--	--	--	--	--	--
Cluster-23048.0	--	--	--	--	--	--	--	--	--	--	--	--	--	--	--	--	--	--	--	--	--	--	--	--	--	--	--	--
Cluster-29767.25600	--	--	--	--	--	--	--	--	--	--	--	--	--	--	--	--	--	--	--	--	--	--	--	--	--	--	--	--
Cluster-29767.25601	--	--	--	--	--	--	--	--	--	--	--	--	--	--	--	--	--	--	--	--	--	--	--	--	--	--	--	--
Cluster-29767.25602	1228868569	XP_021989655.1	2522	6.5e-282	cadmium/zinc-transporting ATPase HMA3-like [Helianthus annuus]	XM_025107556.1	XM_025107556	898	0	PREDICTED: Cynara cardunculus var. scolymus putative inactive cadmium/zinc-transporting ATPase HMA3 (LOC112503537), mRNA	K01534	zntA	Cd2+/Zn2+-exporting ATPase	http://www.genome.jp/dbget-bin/www_bget?ko:K01534	Q9SZW4	1995	3.2e-222	Cadmium/zinc-transporting ATPase HMA2 OS=Arabidopsis thaliana OX=3702 GN=HMA2 PE=2 SV=1	PF00403	Heavy-metal-associated domain	GO:0030001	metal ion transport	GO:0046872	metal ion binding	--	--	KOG0207	Cation transport ATPase
Cluster-29767.25603	--	--	--	--	--	KP332650.1	KP332650	54	5.77e-18	Chrysanthemum x morifolium microsatellite JH-810 sequence	--	--	--	--	--	--	--	--	--	--	--	--	--	--	--	--	--	--
Cluster-19267.0	--	--	--	--	--	MH704580.1	MH704580	65	9.95e-24	Helianthus annuus cultivar HA89(MAX1) CMS mitochondrion, complete genome	--	--	--	--	--	--	--	--	--	--	--	--	--	--	--	--	--	--
Cluster-29767.96688	1387800664	PWA67566.1	147	2e-07	aldehyde oxidase 2 [Artemisia annua]	--	--	--	--	--	--	--	--	--	--	--	--	--	--	--	--	--	--	--	--	--	--	--
Cluster-29767.79848	1387817519	PWA82118.1	816	2.5e-84	phenol hydroxylase reductase, NADH:cytochrome b5 reductase (CBR) [Artemisia annua]	XM_025112483.1	XM_025112483	377	0	PREDICTED: Cynara cardunculus var. scolymus NADH--cytochrome b5 reductase 1-like (LOC112507773), transcript variant X3, mRNA	K00326	E1.6.2.2	cytochrome-b5 reductase	http://www.genome.jp/dbget-bin/www_bget?ko:K00326	Q9ZNT1	656	3.4e-67	NADH--cytochrome b5 reductase 1 OS=Arabidopsis thaliana OX=3702 GN=CBR1 PE=1 SV=1	PF00175	Oxidoreductase NAD-binding domain	GO:0055114	oxidation-reduction process	GO:0016491	oxidoreductase activity	--	--	KOG0534	NADH-cytochrome b-5 reductase
Cluster-29557.0	1387774874	PWA47669.1	271	4.1e-21	hypothetical protein CTI12_AA475510 [Artemisia annua]	--	--	--	--	--	--	--	--	--	--	--	--	--	PF07782	DC-STAMP-like protein	--	--	--	--	GO:0016021	integral component of membrane	--	--
Cluster-29767.17740	1387778291	PWA50060.1	195	2.4e-12	hypothetical protein CTI12_AA476510 [Artemisia annua]	XM_022144812.1	XM_022144812	36	1.82e-07	PREDICTED: Helianthus annuus phytosulfokines 5 (LOC110898081), mRNA	--	--	--	--	Q8LA14	139	2.8e-07	Putative phytosulfokines 6 OS=Arabidopsis thaliana OX=3702 GN=PSK6 PE=2 SV=2	PF06404	Phytosulfokine precursor protein (PSK)	GO:0007165//GO:0008283//GO:0040007	signal transduction//cell population proliferation//growth	GO:0008083	growth factor activity	GO:0005576	extracellular region	--	--
Cluster-29767.61021	1387804049	PWA70390.1	1275	1.8e-137	iron-sulfur cluster biosynthesis family protein [Artemisia annua]	KM398934.1	KM398934	736	0	Artemisia annua iron-sulfur cluster biosynthesis family protein mRNA, partial cds	--	--	--	--	Q8GW20	962	1.3e-102	Uncharacterized protein At5g03900, chloroplastic OS=Arabidopsis thaliana OX=3702 GN=At5g03900 PE=2 SV=2	--	--	--	--	--	--	--	--	--	--
Cluster-29767.96682	1387772200	PWA45854.1	452	9.2e-43	zinc knuckle CX2CX4HX4C [Artemisia annua]	--	--	--	--	--	--	--	--	--	--	--	--	--	--	--	--	--	--	--	--	--	--	--
Cluster-29767.96683	1387827165	PWA90851.1	839	2.1e-87	NB-ARC domains-containing protein [Artemisia annua]	XM_023906827.1	XM_023906827	63	7.15e-23	PREDICTED: Lactuca sativa putative disease resistance protein At3g14460 (LOC111911044), mRNA	--	--	--	--	Q9LRR4	192	8.4e-14	Putative disease resistance RPP13-like protein 1 OS=Arabidopsis thaliana OX=3702 GN=RPPL1 PE=3 SV=1	--	--	--	--	--	--	--	--	--	--
Cluster-29767.96680	--	--	--	--	--	--	--	--	--	--	--	--	--	--	--	--	--	--	--	--	--	--	--	--	--	--	--	--
Cluster-29767.96681	--	--	--	--	--	--	--	--	--	--	--	--	--	--	--	--	--	--	--	--	--	--	--	--	--	--	--	--
Cluster-29767.96686	1387767890	PWA43038.1	280	1.3e-22	toll/interleukin-1 receptor (TIR) domain-containing protein [Artemisia annua]	XM_023881069.1	XM_023881069	56	5.13e-19	PREDICTED: Lactuca sativa TMV resistance protein N-like (LOC111884754), transcript variant X2, mRNA	--	--	--	--	Q40392	142	4.8e-08	TMV resistance protein N OS=Nicotiana glutinosa OX=35889 GN=N PE=1 SV=1	PF01582	TIR domain	GO:0007165	signal transduction	GO:0005515	protein binding	--	--	--	--
Cluster-29767.96687	--	--	--	--	--	--	--	--	--	--	--	--	--	--	--	--	--	--	--	--	--	--	--	--	--	--	--	--
Cluster-29767.96684	1387775264	PWA47939.1	1848	4.9e-204	HXXXD-type acyl-transferase family protein [Artemisia annua]	XM_022182157.1	XM_022182157	512	0	PREDICTED: Helianthus annuus omega-hydroxypalmitate O-feruloyl transferase (LOC110940605), transcript variant X2, mRNA	K15400	HHT1	omega-hydroxypalmitate O-feruloyl transferase	http://www.genome.jp/dbget-bin/www_bget?ko:K15400	Q94CD1	409	1.4e-38	Omega-hydroxypalmitate O-feruloyl transferase OS=Arabidopsis thaliana OX=3702 GN=HHT1 PE=1 SV=1	PF02458	Transferase family	--	--	GO:0016747	transferase activity, transferring acyl groups other than amino-acyl groups	--	--	--	--
Cluster-29767.96685	--	--	--	--	--	--	--	--	--	--	--	--	--	--	--	--	--	--	--	--	--	--	--	--	--	--	--	--
Cluster-29767.90235	--	--	--	--	--	--	--	--	--	--	--	--	--	--	--	--	--	--	--	--	--	--	--	--	--	--	--	--
Cluster-29767.90234	--	--	--	--	--	--	--	--	--	--	--	--	--	--	--	--	--	--	--	--	--	--	--	--	--	--	--	--
Cluster-13564.0	--	--	--	--	--	--	--	--	--	--	--	--	--	--	--	--	--	--	--	--	--	--	--	--	--	--	--	--
Cluster-29767.90236	1387824707	PWA88596.1	1128	1e-120	mitogen-activated protein kinase kinase kinase NPK1 [Artemisia annua]	XM_022141313.1	XM_022141313	384	0	PREDICTED: Helianthus annuus mitogen-activated protein kinase kinase kinase NPK1-like (LOC110894129), transcript variant X3, mRNA	K20606	ANP1	mitogen-activated protein kinase kinase kinase ANP1	http://www.genome.jp/dbget-bin/www_bget?ko:K20606	Q40541	921	4e-98	Mitogen-activated protein kinase kinase kinase NPK1 OS=Nicotiana tabacum OX=4097 GN=NPK1 PE=1 SV=1	PF00069//PF07714	Protein kinase domain//Protein tyrosine and serine/threonine kinase	GO:0006468	protein phosphorylation	GO:0005524//GO:0004672	ATP binding//protein kinase activity	--	--	KOG0198	MEKK and related serine/threonine protein kinases
Cluster-29767.90231	--	--	--	--	--	--	--	--	--	--	--	--	--	--	--	--	--	--	PF01263//PF02805	Aldose 1-epimerase//Metal binding domain of Ada	GO:0006281//GO:0006355//GO:0005975	DNA repair//regulation of transcription, DNA-templated//carbohydrate metabolic process	GO:0008270//GO:0008168//GO:0016853//GO:0003677	zinc ion binding//methyltransferase activity//isomerase activity//DNA binding	--	--	--	--
Cluster-29767.90230	1142647625	AQK42611.1	136	8.2e-06	acetyl-coenzyme A carboxylase1 [Zea mays]	--	--	--	--	--	K11262	ACACA	acetyl-CoA carboxylase / biotin carboxylase 1	http://www.genome.jp/dbget-bin/www_bget?ko:K11262	Q38970	125	5.9e-06	Acetyl-CoA carboxylase 1 OS=Arabidopsis thaliana OX=3702 GN=ACC1 PE=1 SV=1	--	--	--	--	--	--	--	--	--	--
Cluster-29767.90233	--	--	--	--	--	--	--	--	--	--	--	--	--	--	--	--	--	--	--	--	--	--	--	--	--	--	--	--
Cluster-29767.90232	--	--	--	--	--	--	--	--	--	--	--	--	--	--	--	--	--	--	--	--	--	--	--	--	--	--	--	--
Cluster-13105.0	--	--	--	--	--	--	--	--	--	--	--	--	--	--	--	--	--	--	--	--	--	--	--	--	--	--	--	--
Cluster-29767.69490	1387754542	PWA36214.1	217	4.2e-15	Amidohydrolase 1 [Artemisia annua]	--	--	--	--	--	K01427	URE	urease	http://www.genome.jp/dbget-bin/www_bget?ko:K01427	Q9SR52	130	2e-06	Urease OS=Arabidopsis thaliana OX=3702 GN=URE PE=3 SV=1	--	--	--	--	--	--	--	--	--	--
Cluster-29767.69493	1387821763	PWA85925.1	546	6.3e-53	hypothetical protein CTI12_AA144120 [Artemisia annua]	XM_022139203.1	XM_022139203	207	2.15e-102	PREDICTED: Helianthus annuus huntingtin-interacting protein K (LOC110891503), mRNA	--	--	--	--	Q2PFU1	143	1.3e-07	Huntingtin-interacting protein K OS=Macaca fascicularis OX=9541 GN=HYPK PE=2 SV=1	PF00642	Zinc finger C-x8-C-x5-C-x3-H type (and similar)	--	--	GO:0046872	metal ion binding	--	--	KOG3450	Huntingtin interacting protein HYPK
Cluster-29767.69492	1387808178	PWA73921.1	1863	8.8e-206	polyamine transporter PUT1 [Artemisia annua]	XM_022146105.1	XM_022146105	492	0	PREDICTED: Helianthus annuus probable polyamine transporter At1g31830 (LOC110899226), transcript variant X2, mRNA	--	--	--	--	Q9C6S5	1469	1.6e-161	Probable polyamine transporter At1g31830 OS=Arabidopsis thaliana OX=3702 GN=At1g31830 PE=2 SV=1	PF13520//PF00324	Amino acid permease//Amino acid permease	GO:0055085	transmembrane transport	GO:0022857	transmembrane transporter activity	GO:0016020	membrane	--	--
Cluster-29767.90239	--	--	--	--	--	--	--	--	--	--	--	--	--	--	--	--	--	--	--	--	--	--	--	--	--	--	--	--
Cluster-29767.69494	--	--	--	--	--	--	--	--	--	--	--	--	--	--	--	--	--	--	--	--	--	--	--	--	--	--	--	--
Cluster-22953.0	1377598186	GBG34358.1	582	1e-57	40S ribosomal protein S15a [Hondaea fermentalgiana]	--	--	--	--	--	K02957	RP-S15Ae, RPS15A	small subunit ribosomal protein S15Ae	http://www.genome.jp/dbget-bin/www_bget?ko:K02957	P62246	671	1.8e-69	40S ribosomal protein S15a OS=Rattus norvegicus OX=10116 GN=Rps15a PE=1 SV=2	PF00410	Ribosomal protein S8	GO:0006412//GO:0042254	translation//ribosome biogenesis	GO:0003735	structural constituent of ribosome	GO:0005840	ribosome	KOG1754	40S ribosomal protein S15/S22
Cluster-29767.64560	1389803698	XP_024966222.1	1687	2.7e-185	calcium-dependent protein kinase 9-like [Cynara cardunculus var. scolymus]	XM_022122537.1	XM_022122537	715	0	PREDICTED: Helianthus annuus calcium-dependent protein kinase 9-like (LOC110873588), mRNA	K13412	CPK	calcium-dependent protein kinase	http://www.genome.jp/dbget-bin/www_bget?ko:K13412	P53683	1530	1.6e-168	Calcium-dependent protein kinase 19 OS=Oryza sativa subsp. japonica OX=39947 GN=CPK19 PE=2 SV=2	PF00036//PF12763//PF07714//PF10591//PF13405//PF13499//PF13202//PF00404//PF00069	EF hand//Cytoskeletal-regulatory complex EF hand//Protein tyrosine and serine/threonine kinase//Secreted protein acidic and rich in cysteine Ca binding region//EF-hand domain//EF-hand domain pair//EF hand//Dockerin type I domain//Protein kinase domain	GO:0006468//GO:0005975//GO:0000272	protein phosphorylation//carbohydrate metabolic process//polysaccharide catabolic process	GO:0004553//GO:0005515//GO:0004672//GO:0005509//GO:0005524	hydrolase activity, hydrolyzing O-glycosyl compounds//protein binding//protein kinase activity//calcium ion binding//ATP binding	--	--	--	--
Cluster-29767.17741	--	--	--	--	--	--	--	--	--	--	--	--	--	--	--	--	--	--	PF01184	GPR1/FUN34/yaaH family	--	--	--	--	GO:0016021	integral component of membrane	--	--
Cluster-29767.100917	--	--	--	--	--	--	--	--	--	--	--	--	--	--	--	--	--	--	--	--	--	--	--	--	--	--	--	--
Cluster-17434.0	--	--	--	--	--	--	--	--	--	--	--	--	--	--	--	--	--	--	--	--	--	--	--	--	--	--	--	--
Cluster-29767.46489	--	--	--	--	--	XM_025118245.1	XM_025118245	102	1.29e-44	PREDICTED: Cynara cardunculus var. scolymus protein SMG7-like (LOC112512344), transcript variant X5, mRNA	--	--	--	--	--	--	--	--	--	--	--	--	--	--	--	--	--	--
Cluster-29767.46488	1387763186	PWA40229.1	2793	0	protein SMG7 [Artemisia annua]	XM_025118244.1	XM_025118244	649	0	PREDICTED: Cynara cardunculus var. scolymus protein SMG7-like (LOC112512344), transcript variant X4, mRNA	K14409	SMG7, EST1C	protein SMG7	http://www.genome.jp/dbget-bin/www_bget?ko:K14409	A9QM73	861	2e-90	Protein SMG7 OS=Arabidopsis thaliana OX=3702 GN=SMG7 PE=1 SV=1	PF03943//PF13176//PF02173	TAP C-terminal domain//Tetratricopeptide repeat//pKID domain	GO:0051028//GO:0006355	mRNA transport//regulation of transcription, DNA-templated	GO:0005515	protein binding	GO:0005634	nucleus	--	--
Cluster-29767.44959	--	--	--	--	--	--	--	--	--	--	--	--	--	--	--	--	--	--	PF07127	Late nodulin protein	GO:0009878	nodule morphogenesis	GO:0046872	metal ion binding	--	--	--	--
Cluster-4723.0	--	--	--	--	--	--	--	--	--	--	--	--	--	--	--	--	--	--	--	--	--	--	--	--	--	--	--	--
Cluster-29767.46481	1387791250	PWA59854.1	449	2.2e-42	protein kinase-like domain, Phloem protein 2-like protein [Artemisia annua]	--	--	--	--	--	K04733	IRAK4	interleukin-1 receptor-associated kinase 4	http://www.genome.jp/dbget-bin/www_bget?ko:K04733	Q9M2S4	143	2.5e-08	L-type lectin-domain containing receptor kinase S.4 OS=Arabidopsis thaliana OX=3702 GN=LECRKS4 PE=2 SV=1	PF00069//PF07714	Protein kinase domain//Protein tyrosine and serine/threonine kinase	GO:0006468	protein phosphorylation	GO:0005524//GO:0004672	ATP binding//protein kinase activity	--	--	--	--
Cluster-29767.46480	1387791250	PWA59854.1	420	4.9e-39	protein kinase-like domain, Phloem protein 2-like protein [Artemisia annua]	--	--	--	--	--	--	--	--	--	--	--	--	--	--	--	--	--	--	--	--	--	--	--
Cluster-29767.46483	1191686150	OTG38111.1	362	1.8e-31	hypothetical protein HannXRQ_Chr01g0026141 [Helianthus annuus]	--	--	--	--	--	--	--	--	--	--	--	--	--	PF00430//PF15718	ATP synthase B/B' CF(0)//Protein moonraker	GO:0007099//GO:0015986	centriole replication//ATP synthesis coupled proton transport	GO:0015078	proton transmembrane transporter activity	GO:0045263	proton-transporting ATP synthase complex, coupling factor F(o)	--	--
Cluster-29767.46482	1387829281	PWA92807.1	1433	9.5e-156	cytochrome P450 [Artemisia annua]	--	--	--	--	--	--	--	--	--	Q9FXW4	795	3.5e-83	Probable (S)-N-methylcoclaurine 3'-hydroxylase isozyme 2 OS=Coptis japonica OX=3442 GN=CYP80B2 PE=2 SV=1	PF00067	Cytochrome P450	GO:0055114	oxidation-reduction process	GO:0005506//GO:0016705//GO:0020037	iron ion binding//oxidoreductase activity, acting on paired donors, with incorporation or reduction of molecular oxygen//heme binding	--	--	--	--
Cluster-29767.46485	1387786415	PWA56082.1	587	2.3e-58	mitogen-activated protein (MAP) kinase kinase kinase Ste11, Cryptococcus [Artemisia annua]	--	--	--	--	--	--	--	--	--	C0LGR6	271	3.8e-23	Probable LRR receptor-like serine/threonine-protein kinase At4g29180 OS=Arabidopsis thaliana OX=3702 GN=At4g29180 PE=1 SV=2	PF07714//PF00069	Protein tyrosine and serine/threonine kinase//Protein kinase domain	GO:0006468	protein phosphorylation	GO:0004672//GO:0005524	protein kinase activity//ATP binding	--	--	--	--
Cluster-29767.43314	1387810323	PWA75772.1	1601	2.6e-175	G2/mitotic-specific cyclin-1 [Artemisia annua]	XM_022145691.1	XM_022145691	245	1.45e-123	PREDICTED: Helianthus annuus G2/mitotic-specific cyclin S13-7-like (LOC110898844), mRNA	K05868	CCNB	cyclin B	http://www.genome.jp/dbget-bin/www_bget?ko:K05868	P34801	939	5.8e-100	G2/mitotic-specific cyclin-2 OS=Antirrhinum majus OX=4151 PE=2 SV=1	PF04313//PF02984	Type I restriction enzyme R protein N terminus (HSDR_N)//Cyclin, C-terminal domain	GO:0006304	DNA modification	GO:0003677//GO:0004519	DNA binding//endonuclease activity	GO:0042025	host cell nucleus	--	--
Cluster-29767.46487	--	--	--	--	--	--	--	--	--	--	--	--	--	--	--	--	--	--	--	--	--	--	--	--	--	--	--	--
Cluster-29767.46486	1387816292	PWA81025.1	175	1.5e-09	Peptidyl-prolyl cis-trans isomerase, FKBP-type [Artemisia annua]	--	--	--	--	--	--	--	--	--	Q9SV84	134	3.2e-06	Probable aquaporin NIP5-1 OS=Arabidopsis thaliana OX=3702 GN=NIP5-1 PE=2 SV=1	PF00230//PF00520	Major intrinsic protein//Ion transport protein	GO:0006811//GO:0055085//GO:0006810	ion transport//transmembrane transport//transport	GO:0015267//GO:0005216	channel activity//ion channel activity	GO:0016020	membrane	--	--
Cluster-29767.19463	1387813082	PWA78194.1	673	3.4e-68	PB1 domain, RWP-RK domain, Lambda repressor-like, DNA-binding domain protein [Artemisia annua]	--	--	--	--	--	--	--	--	--	--	--	--	--	--	--	--	--	--	--	--	--	--	--
Cluster-29767.19462	--	--	--	--	--	--	--	--	--	--	--	--	--	--	--	--	--	--	PF00096	Zinc finger, C2H2 type	--	--	GO:0003676	nucleic acid binding	--	--	--	--
Cluster-29767.19461	--	--	--	--	--	--	--	--	--	--	--	--	--	--	--	--	--	--	--	--	--	--	--	--	--	--	--	--
Cluster-29767.19460	--	--	--	--	--	--	--	--	--	--	--	--	--	--	--	--	--	--	--	--	--	--	--	--	--	--	--	--
Cluster-29767.19467	--	--	--	--	--	--	--	--	--	--	--	--	--	--	--	--	--	--	--	--	--	--	--	--	--	--	--	--
Cluster-29767.19466	1387813082	PWA78194.1	354	7e-31	PB1 domain, RWP-RK domain, Lambda repressor-like, DNA-binding domain protein [Artemisia annua]	KT253083.1	KT253083	88	1.81e-36	Chrysanthemum x morifolium NIN-like protein (NLP18) mRNA, partial cds	--	--	--	--	Q84TH9	132	1.5e-06	Protein NLP7 OS=Arabidopsis thaliana OX=3702 GN=NLP7 PE=1 SV=2	PF00564	PB1 domain	--	--	GO:0005515	protein binding	--	--	--	--
Cluster-29767.19465	1387813082	PWA78194.1	707	9e-72	PB1 domain, RWP-RK domain, Lambda repressor-like, DNA-binding domain protein [Artemisia annua]	KT253075.1	KT253075	43	2.07e-11	Chrysanthemum x morifolium NIN-like protein (NLP10) mRNA, partial cds	--	--	--	--	--	--	--	--	PF00564	PB1 domain	--	--	GO:0005515	protein binding	--	--	--	--
Cluster-29767.99941	1387826380	PWA90124.1	904	1.2e-94	GRAM domain-containing protein [Artemisia annua]	--	--	--	--	--	--	--	--	--	Q9FMW6	423	2.6e-40	GEM-like protein 6 OS=Arabidopsis thaliana OX=3702 GN=At5g23350 PE=2 SV=2	--	--	--	--	--	--	--	--	--	--
Cluster-25233.0	--	--	--	--	--	--	--	--	--	--	--	--	--	--	--	--	--	--	--	--	--	--	--	--	--	--	--	--
Cluster-29767.19469	1387822381	PWA86484.1	173	7.4e-10	metallo-hydrolase/oxidoreductase superfamily protein [Artemisia annua]	--	--	--	--	--	--	--	--	--	--	--	--	--	--	--	--	--	--	--	--	--	--	--
Cluster-29767.19468	--	--	--	--	--	--	--	--	--	--	--	--	--	--	--	--	--	--	PF04277	Oxaloacetate decarboxylase, gamma chain	GO:0006814//GO:0006560//GO:0036376//GO:0006525//GO:0006090	sodium ion transport//proline metabolic process//sodium ion export across plasma membrane//arginine metabolic process//pyruvate metabolic process	GO:0015081//GO:0008948	sodium ion transmembrane transporter activity//oxaloacetate decarboxylase activity	GO:0016020	membrane	--	--
Cluster-29767.64069	--	--	--	--	--	--	--	--	--	--	--	--	--	--	--	--	--	--	PF04647	Accessory gene regulator B	GO:0009405//GO:0009372	pathogenesis//quorum sensing	GO:0008233	peptidase activity	GO:0016021	integral component of membrane	--	--
Cluster-27753.0	--	--	--	--	--	--	--	--	--	--	--	--	--	--	--	--	--	--	--	--	--	--	--	--	--	--	--	--
Cluster-26535.0	1387759553	PWA38363.1	3072	0	MORN motif-containing protein [Artemisia annua]	XM_025107232.1	XM_025107232	839	0	PREDICTED: Cynara cardunculus var. scolymus phosphatidylinositol 4-phosphate 5-kinase 6-like (LOC112503164), transcript variant X3, mRNA	K00889	PIP5K	1-phosphatidylinositol-4-phosphate 5-kinase	http://www.genome.jp/dbget-bin/www_bget?ko:K00889	Q9SFB8	1973	9.2e-220	Phosphatidylinositol 4-phosphate 5-kinase 6 OS=Arabidopsis thaliana OX=3702 GN=PIP5K6 PE=2 SV=1	PF01504//PF05191	Phosphatidylinositol-4-phosphate 5-Kinase//Adenylate kinase, active site lid	GO:0046488//GO:0046034//GO:0006144	phosphatidylinositol metabolic process//ATP metabolic process//purine nucleobase metabolic process	GO:0004017//GO:0016307	adenylate kinase activity//phosphatidylinositol phosphate kinase activity	--	--	--	--
Cluster-25741.0	--	--	--	--	--	--	--	--	--	--	--	--	--	--	--	--	--	--	--	--	--	--	--	--	--	--	--	--
Cluster-29767.71836	1387795251	PWA63062.1	1116	5.1e-119	Zinc finger, RING-CH-type [Artemisia annua]	XM_025124503.1	XM_025124503	535	0	PREDICTED: Cynara cardunculus var. scolymus E3 ubiquitin-protein ligase MARCH1 (LOC112517154), transcript variant X4, mRNA	--	--	--	--	--	--	--	--	PF12906//PF08540	RING-variant domain//Hydroxymethylglutaryl-coenzyme A synthase C terminal	GO:0006550//GO:0006084//GO:0008299//GO:0006552//GO:0006574//GO:0046950	isoleucine catabolic process//acetyl-CoA metabolic process//isoprenoid biosynthetic process//leucine catabolic process//valine catabolic process//cellular ketone body metabolic process	GO:0004421//GO:0008270	hydroxymethylglutaryl-CoA synthase activity//zinc ion binding	--	--	--	--
Cluster-29767.71837	1387832570	PWA95875.1	305	8.7e-25	SIN3-like 4 [Artemisia annua]	--	--	--	--	--	--	--	--	--	Q9LZU5	139	5.8e-07	Kinesin-like protein KIN-5D OS=Arabidopsis thaliana OX=3702 GN=KIN5D PE=3 SV=1	PF12125//PF00547	D domain of beta-TrCP//Urease, gamma subunit	GO:0043419	urea catabolic process	GO:0016151//GO:0046983	nickel cation binding//protein dimerization activity	--	--	--	--
Cluster-29767.71834	--	--	--	--	--	--	--	--	--	--	--	--	--	--	--	--	--	--	--	--	--	--	--	--	--	--	--	--
Cluster-29767.71835	418203660	BAM66576.1	1525	2.1e-166	ferulate-5-hydroxylase [Chrysanthemum x morifolium]	AB500858.1	AB500858	834	0	Chrysanthemum x morifolium F5H mRNA for ferulate-5-hydroxylase, complete cds	--	--	--	--	Q42600	1019	3.8e-109	Cytochrome P450 84A1 OS=Arabidopsis thaliana OX=3702 GN=CYP84A1 PE=1 SV=1	PF00067//PF02583	Cytochrome P450//Metal-sensitive transcriptional repressor	GO:0055114//GO:0006355	oxidation-reduction process//regulation of transcription, DNA-templated	GO:0020037//GO:0016705//GO:0003677//GO:0046872//GO:0005506	heme binding//oxidoreductase activity, acting on paired donors, with incorporation or reduction of molecular oxygen//DNA binding//metal ion binding//iron ion binding	--	--	--	--
Cluster-29767.71832	1389779226	XP_024990249.1	249	7.3e-19	nucleobase-ascorbate transporter 6-like [Cynara cardunculus var. scolymus]	XM_022142284.1	XM_022142284	81	9.73e-33	PREDICTED: Helianthus annuus nucleobase-ascorbate transporter 6-like (LOC110895025), transcript variant X2, mRNA	K14611	SLC23A1_2, SVCT1_2	solute carrier family 23 (nucleobase transporter), member 1/2	http://www.genome.jp/dbget-bin/www_bget?ko:K14611	Q27GI3	188	3.3e-13	Nucleobase-ascorbate transporter 6 OS=Arabidopsis thaliana OX=3702 GN=NAT6 PE=2 SV=2	--	--	--	--	--	--	--	--	--	--
Cluster-5773.0	--	--	--	--	--	--	--	--	--	--	--	--	--	--	--	--	--	--	--	--	--	--	--	--	--	--	--	--
Cluster-14173.0	1269936747	XP_022717609.1	173	2e-10	CBS domain-containing protein CBSX3, mitochondrial-like [Durio zibethinus]	XM_022119228.1	XM_022119228	132	1.73e-61	PREDICTED: Helianthus annuus CBS domain-containing protein CBSX3, mitochondrial-like (LOC110870019), transcript variant X4, mRNA	--	--	--	--	Q9LEV3	162	1.4e-10	CBS domain-containing protein CBSX3, mitochondrial OS=Arabidopsis thaliana OX=3702 GN=CBSX3 PE=1 SV=1	PF10414	Sirohaem synthase dimerisation region	GO:0006779//GO:0055114	porphyrin-containing compound biosynthetic process//oxidation-reduction process	--	--	--	--	--	--
Cluster-29767.71831	--	--	--	--	--	--	--	--	--	--	--	--	--	--	--	--	--	--	--	--	--	--	--	--	--	--	--	--
Cluster-29767.99947	--	--	--	--	--	--	--	--	--	--	--	--	--	--	--	--	--	--	--	--	--	--	--	--	--	--	--	--
Cluster-29767.71838	1002359495	AMN10094.1	562	1.7e-55	3-hydroxy-3-methylglutaryl-CoA synthase [Chamaemelum nobile]	GQ468551.1	GQ468551	321	1.61e-166	Artemisia annua putative HMG-CoA synthase 2 (HMGS2) mRNA, partial cds	K01641	E2.3.3.10	hydroxymethylglutaryl-CoA synthase	http://www.genome.jp/dbget-bin/www_bget?ko:K01641	P54873	409	3.5e-39	Hydroxymethylglutaryl-CoA synthase OS=Arabidopsis thaliana OX=3702 GN=HMGS PE=1 SV=2	PF08540	Hydroxymethylglutaryl-coenzyme A synthase C terminal	GO:0006574//GO:0006084//GO:0006550//GO:0046950//GO:0006552//GO:0008299	valine catabolic process//acetyl-CoA metabolic process//isoleucine catabolic process//cellular ketone body metabolic process//leucine catabolic process//isoprenoid biosynthetic process	GO:0004421	hydroxymethylglutaryl-CoA synthase activity	--	--	KOG1393	Hydroxymethylglutaryl-CoA synthase
Cluster-29767.71839	1387779389	PWA50860.1	923	8.3e-97	HMG-CoA synthase 1 [Artemisia annua]	GQ468550.1	GQ468550	513	0	Artemisia annua putative HMG-CoA synthase 1 (HMGS1) mRNA, complete cds	--	--	--	--	P54873	652	8.4e-67	Hydroxymethylglutaryl-CoA synthase OS=Arabidopsis thaliana OX=3702 GN=HMGS PE=1 SV=2	PF08540//PF16796	Hydroxymethylglutaryl-coenzyme A synthase C terminal//Microtubule binding	GO:0006550//GO:0006084//GO:0006552//GO:0008299//GO:0006574//GO:0046950	isoleucine catabolic process//acetyl-CoA metabolic process//leucine catabolic process//isoprenoid biosynthetic process//valine catabolic process//cellular ketone body metabolic process	GO:0004421//GO:0008017	hydroxymethylglutaryl-CoA synthase activity//microtubule binding	GO:0045298	tubulin complex	KOG1393	Hydroxymethylglutaryl-CoA synthase
Cluster-29767.96608	1387827027	PWA90724.1	585	4.2e-58	leucine-rich repeat receptor-like protein kinase family protein [Artemisia annua]	XM_023876389.1	XM_023876389	118	1.32e-53	PREDICTED: Lactuca sativa MDIS1-interacting receptor like kinase 2-like (LOC111879965), mRNA	--	--	--	--	Q8VZG8	238	2.7e-19	MDIS1-interacting receptor like kinase 2 OS=Arabidopsis thaliana OX=3702 GN=MIK2 PE=1 SV=3	PF00560//PF13855//PF13516	Leucine Rich Repeat//Leucine rich repeat//Leucine Rich repeat	--	--	GO:0005515	protein binding	--	--	--	--
Cluster-21981.0	--	--	--	--	--	XM_022142046.1	XM_022142046	42	6.6e-11	PREDICTED: Helianthus annuus deoxynucleoside triphosphate triphosphohydrolase SAMHD1 homolog (LOC110894820), mRNA	--	--	--	--	--	--	--	--	--	--	--	--	--	--	--	--	--	--
Cluster-29767.97239	--	--	--	--	--	--	--	--	--	--	--	--	--	--	--	--	--	--	--	--	--	--	--	--	--	--	--	--
Cluster-5650.0	--	--	--	--	--	--	--	--	--	--	--	--	--	--	--	--	--	--	--	--	--	--	--	--	--	--	--	--
Cluster-29767.16261	--	--	--	--	--	--	--	--	--	--	--	--	--	--	--	--	--	--	--	--	--	--	--	--	--	--	--	--
Cluster-32690.0	--	--	--	--	--	--	--	--	--	--	--	--	--	--	--	--	--	--	--	--	--	--	--	--	--	--	--	--
Cluster-29767.67615	1387822186	PWA86310.1	496	6.9e-48	toll/interleukin-1 receptor (TIR) domain-containing protein [Artemisia annua]	--	--	--	--	--	--	--	--	--	Q40392	218	4.5e-17	TMV resistance protein N OS=Nicotiana glutinosa OX=35889 GN=N PE=1 SV=1	PF00931	NB-ARC domain	--	--	GO:0043531	ADP binding	--	--	--	--
Cluster-31814.0	--	--	--	--	--	--	--	--	--	--	--	--	--	--	--	--	--	--	--	--	--	--	--	--	--	--	--	--
Cluster-29767.67614	1387824918	PWA88788.1	377	4.7e-34	disease resistance protein (TIR-NBS-LRR class) [Artemisia annua]	--	--	--	--	--	--	--	--	--	--	--	--	--	PF13855//PF00560	Leucine rich repeat//Leucine Rich Repeat	--	--	GO:0005515	protein binding	--	--	--	--
Cluster-29767.2907	--	--	--	--	--	--	--	--	--	--	--	--	--	--	--	--	--	--	--	--	--	--	--	--	--	--	--	--
Cluster-6733.0	--	--	--	--	--	--	--	--	--	--	--	--	--	--	--	--	--	--	--	--	--	--	--	--	--	--	--	--
Cluster-29767.8283	315321250	ADU04751.1	213	4.9e-15	ubiquitin extension protein, partial [Mesostigma viride]	XM_022013174.1	XM_022013174	137	3.04e-64	Kockovaella imperatae ubiquitin-domain-containing protein (BD324DRAFT_576127), partial mRNA	K02977	RP-S27Ae, RPS27A	small subunit ribosomal protein S27Ae	http://www.genome.jp/dbget-bin/www_bget?ko:K02977	P14799	219	3.7e-17	Ubiquitin-40S ribosomal protein S27a OS=Neurospora crassa (strain ATCC 24698 / 74-OR23-1A / CBS 708.71 / DSM 1257 / FGSC 987) OX=367110 GN=ubi::crp-6 PE=1 SV=4	PF01599	Ribosomal protein S27a	GO:0042254//GO:0006412	ribosome biogenesis//translation	GO:0003735	structural constituent of ribosome	GO:0005840	ribosome	KOG0004	Ubiquitin/40S ribosomal protein S27a fusion
Cluster-29767.11854	--	--	--	--	--	KP334085.1	KP334085	86	6.9e-36	Chrysanthemum x morifolium microsatellite JH-2257 sequence	--	--	--	--	--	--	--	--	--	--	--	--	--	--	--	--	--	--
Cluster-22483.0	--	--	--	--	--	--	--	--	--	--	--	--	--	--	--	--	--	--	--	--	--	--	--	--	--	--	--	--
Cluster-17588.0	--	--	--	--	--	--	--	--	--	--	--	--	--	--	--	--	--	--	--	--	--	--	--	--	--	--	--	--
Cluster-29767.73069	1389788450	XP_024993224.1	846	1e-87	probable protein S-acyltransferase 14 isoform X1 [Cynara cardunculus var. scolymus]	XM_025137456.1	XM_025137456	500	0	PREDICTED: Cynara cardunculus var. scolymus probable protein S-acyltransferase 14 (LOC112526993), transcript variant X1, mRNA	K20028	ZDHHC2_15_20	palmitoyltransferase ZDHHC2/15/20	http://www.genome.jp/dbget-bin/www_bget?ko:K20028	Q8VYP5	716	4.7e-74	Probable protein S-acyltransferase 14 OS=Arabidopsis thaliana OX=3702 GN=PAT14 PE=2 SV=1	PF01529//PF02565	DHHC palmitoyltransferase//Recombination protein O C terminal	GO:0006310//GO:0006281//GO:0042967	DNA recombination//DNA repair//obsolete acyl-carrier-protein biosynthetic process	GO:0016409	palmitoyltransferase activity	--	--	KOG1315	Predicted DHHC-type Zn-finger protein
Cluster-29767.73068	--	--	--	--	--	--	--	--	--	--	--	--	--	--	--	--	--	--	--	--	--	--	--	--	--	--	--	--
Cluster-11731.0	--	--	--	--	--	--	--	--	--	--	--	--	--	--	--	--	--	--	--	--	--	--	--	--	--	--	--	--
Cluster-29767.73063	1387805566	PWA71693.1	986	7.2e-104	zinc finger, C2H2-like protein [Artemisia annua]	XM_022173108.1	XM_022173108	227	1.97e-113	PREDICTED: Helianthus annuus protein indeterminate-domain 11-like (LOC110929919), transcript variant X3, mRNA	--	--	--	--	Q9ZUL3	187	1.2e-12	Protein indeterminate-domain 5, chloroplastic OS=Arabidopsis thaliana OX=3702 GN=IDD5 PE=1 SV=1	--	--	--	--	--	--	--	--	--	--
Cluster-29767.73062	--	--	--	--	--	KP333001.1	KP333001	60	4.27e-21	Chrysanthemum x morifolium microsatellite JH-1165 sequence	--	--	--	--	--	--	--	--	--	--	--	--	--	--	--	--	--	--
Cluster-29767.73061	1389747439	XP_024978054.1	1021	1.5e-107	G-type lectin S-receptor-like serine/threonine-protein kinase At4g27290 isoform X7 [Cynara cardunculus var. scolymus]	XM_022124080.1	XM_022124080	100	1.81e-42	PREDICTED: Helianthus annuus G-type lectin S-receptor-like serine/threonine-protein kinase SD1-1 (LOC110875884), mRNA	--	--	--	--	O81833	692	7.8e-71	G-type lectin S-receptor-like serine/threonine-protein kinase SD1-1 OS=Arabidopsis thaliana OX=3702 GN=SD11 PE=1 SV=1	PF01424//PF16251//PF11883//PF07714//PF02404//PF00069	R3H domain//Betacoronavirus nucleic acid-binding (NAR)//Domain of unknown function (DUF3403)//Protein tyrosine and serine/threonine kinase//Stem cell factor//Protein kinase domain	GO:0007165//GO:0009069//GO:0007155//GO:0006468//GO:0016310	signal transduction//serine family amino acid metabolic process//cell adhesion//protein phosphorylation//phosphorylation	GO:0003676//GO:0005173//GO:0004672//GO:0005524//GO:0004674	nucleic acid binding//stem cell factor receptor binding//protein kinase activity//ATP binding//protein serine/threonine kinase activity	GO:0016020	membrane	--	--
Cluster-29767.73060	1387806988	PWA72904.1	150	2.5e-07	hypothetical protein CTI12_AA266180 [Artemisia annua]	--	--	--	--	--	--	--	--	--	--	--	--	--	--	--	--	--	--	--	--	--	--	--
Cluster-29767.73067	1340507926	XP_023734820.1	395	8.2e-36	probable sugar phosphate/phosphate translocator At3g11320 [Lactuca sativa]	--	--	--	--	--	--	--	--	--	Q5XF09	348	8.8e-32	Probable sugar phosphate/phosphate translocator At3g11320 OS=Arabidopsis thaliana OX=3702 GN=At3g11320 PE=2 SV=1	PF10181//PF08449	GPI-GlcNAc transferase complex, PIG-H component//UAA transporter family	GO:0055085	transmembrane transport	GO:0017176	phosphatidylinositol N-acetylglucosaminyltransferase activity	--	--	--	--
Cluster-29767.73066	1387798715	PWA65936.1	180	3.7e-10	glycoside hydrolase family 9, Six-hairpin glycosidase-like protein [Artemisia annua]	--	--	--	--	--	--	--	--	--	Q8LQ92	148	7.3e-08	Endoglucanase 3 OS=Oryza sativa subsp. japonica OX=39947 GN=GLU8 PE=2 SV=1	PF03839	Translocation protein Sec62	GO:0015031	protein transport	--	--	GO:0030176	integral component of endoplasmic reticulum membrane	--	--
Cluster-29767.73065	--	--	--	--	--	--	--	--	--	--	--	--	--	--	--	--	--	--	--	--	--	--	--	--	--	--	--	--
Cluster-29767.73064	1387792994	PWA61237.1	277	2.3e-22	hypothetical protein CTI12_AA374720 [Artemisia annua]	--	--	--	--	--	--	--	--	--	--	--	--	--	--	--	--	--	--	--	--	--	--	--
Cluster-29767.90738	976920608	KVI05327.1	1862	2.8e-205	Leucine-rich repeat-containing protein, partial [Cynara cardunculus var. scolymus]	XM_025134138.1	XM_025134138	655	0	PREDICTED: Cynara cardunculus var. scolymus piriformospora indica-insensitive protein 2-like (LOC112524355), mRNA	--	--	--	--	Q5PP26	1167	4.1e-126	Piriformospora indica-insensitive protein 2 OS=Arabidopsis thaliana OX=3702 GN=PII-2 PE=2 SV=1	PF02841//PF00560//PF13516//PF13855	Guanylate-binding protein, C-terminal domain//Leucine Rich Repeat//Leucine Rich repeat//Leucine rich repeat	--	--	GO:0005525//GO:0005515//GO:0003924	GTP binding//protein binding//GTPase activity	--	--	--	--
Cluster-29767.49243	1387808195	PWA73936.1	765	1.2e-78	hypothetical protein CTI12_AA255560 [Artemisia annua]	--	--	--	--	--	--	--	--	--	--	--	--	--	--	--	--	--	--	--	--	--	--	--
Cluster-29767.11850	1387828013	PWA91635.1	389	4.6e-35	separase [Artemisia annua]	--	--	--	--	--	K02365	ESP1	separase	http://www.genome.jp/dbget-bin/www_bget?ko:K02365	--	--	--	--	--	--	--	--	--	--	--	--	--	--
Cluster-30313.0	1387831740	PWA95096.1	1068	1.4e-113	CCT domain-containing protein [Artemisia annua]	XM_023917444.1	XM_023917444	447	0	PREDICTED: Lactuca sativa zinc finger protein CONSTANS-LIKE 2-like (LOC111921870), mRNA	--	--	--	--	E5RQA1	141	1.7e-07	Transcription factor GHD7 OS=Oryza sativa subsp. japonica OX=39947 GN=GHD7 PE=1 SV=1	PF06203	CCT motif	--	--	GO:0005515	protein binding	--	--	--	--
Cluster-29767.67612	1387799614	PWA66687.1	796	2.5e-82	FTSH protease 3 [Artemisia annua]	XM_025125460.1	XM_025125460	401	0	PREDICTED: Cynara cardunculus var. scolymus ATP-dependent zinc metalloprotease FTSH 10, mitochondrial (LOC112517983), transcript variant X2, mRNA	K08956	AFG3	AFG3 family protein	http://www.genome.jp/dbget-bin/www_bget?ko:K08956	Q84WU8	592	4.3e-60	ATP-dependent zinc metalloprotease FTSH 3, mitochondrial OS=Arabidopsis thaliana OX=3702 GN=FTSH3 PE=1 SV=1	--	--	--	--	--	--	--	--	KOG0731	AAA+-type ATPase containing the peptidase M41 domain
Cluster-29056.0	--	--	--	--	--	--	--	--	--	--	--	--	--	--	--	--	--	--	--	--	--	--	--	--	--	--	--	--
Cluster-29767.74176	1389814936	XP_024972190.1	3725	0	respiratory burst oxidase homolog protein C-like [Cynara cardunculus var. scolymus]	XM_025116422.1	XM_025116422	1558	0	PREDICTED: Cynara cardunculus var. scolymus respiratory burst oxidase homolog protein C-like (LOC112511051), mRNA	K13447	RBOH	respiratory burst oxidase	http://www.genome.jp/dbget-bin/www_bget?ko:K13447	Q2HXL0	3180	0	Respiratory burst oxidase homolog protein C OS=Solanum tuberosum OX=4113 GN=RBOHC PE=1 SV=2	PF00036//PF08121//PF08030//PF09771//PF08022//PF13405//PF13499//PF08414//PF13202	EF hand//Waglerin family//Ferric reductase NAD binding domain//Transmembrane protein 188//FAD-binding domain//EF-hand domain//EF-hand domain pair//Respiratory burst NADPH oxidase//EF hand	GO:0035307//GO:0007268//GO:0006979//GO:0055114//GO:0006804//GO:0007165	positive regulation of protein dephosphorylation//chemical synaptic transmission//response to oxidative stress//oxidation-reduction process//obsolete peroxidase reaction//signal transduction	GO:0030550//GO:0050664//GO:0004601//GO:0016491//GO:0005509	acetylcholine receptor inhibitor activity//oxidoreductase activity, acting on NAD(P)H, oxygen as acceptor//peroxidase activity//oxidoreductase activity//calcium ion binding	GO:0071595//GO:0005576	Nem1-Spo7 phosphatase complex//extracellular region	--	--
Cluster-25595.0	--	--	--	--	--	--	--	--	--	--	--	--	--	--	--	--	--	--	PF00895	ATP synthase protein 8	GO:0015986	ATP synthesis coupled proton transport	GO:0015078	proton transmembrane transporter activity	GO:0000276	mitochondrial proton-transporting ATP synthase complex, coupling factor F(o)	--	--
Cluster-31308.0	--	--	--	--	--	--	--	--	--	--	--	--	--	--	--	--	--	--	--	--	--	--	--	--	--	--	--	--
Cluster-27195.0	--	--	--	--	--	--	--	--	--	--	--	--	--	--	--	--	--	--	--	--	--	--	--	--	--	--	--	--
Cluster-29767.39345	--	--	--	--	--	--	--	--	--	--	--	--	--	--	--	--	--	--	--	--	--	--	--	--	--	--	--	--
Cluster-29767.23325	--	--	--	--	--	--	--	--	--	--	--	--	--	--	--	--	--	--	--	--	--	--	--	--	--	--	--	--
Cluster-7044.1	976900044	KVH88333.1	647	3.5e-65	Concanavalin A-like lectin/glucanase, subgroup [Cynara cardunculus var. scolymus]	XM_022181290.1	XM_022181290	225	5.82e-113	PREDICTED: Helianthus annuus cysteine-rich receptor-like protein kinase 10 (LOC110939718), mRNA	--	--	--	--	Q9ZR08	488	3.7e-48	G-type lectin S-receptor-like serine/threonine-protein kinase At4g03230 OS=Arabidopsis thaliana OX=3702 GN=At4g03230 PE=3 SV=3	PF07714//PF00069	Protein tyrosine and serine/threonine kinase//Protein kinase domain	GO:0006468	protein phosphorylation	GO:0004672//GO:0005524	protein kinase activity//ATP binding	--	--	--	--
Cluster-29767.96797	--	--	--	--	--	--	--	--	--	--	--	--	--	--	--	--	--	--	--	--	--	--	--	--	--	--	--	--
Cluster-24967.0	--	--	--	--	--	--	--	--	--	--	--	--	--	--	--	--	--	--	--	--	--	--	--	--	--	--	--	--
Cluster-29767.67618	1387763766	PWA40565.1	643	9.2e-65	toll/interleukin-1 receptor (TIR) domain-containing protein [Artemisia annua]	XM_023884282.1	XM_023884282	47	4.64e-14	PREDICTED: Lactuca sativa TMV resistance protein N-like (LOC111888152), mRNA	--	--	--	--	F4JT80	190	1.2e-13	Disease resistance protein RPP2B OS=Arabidopsis thaliana OX=3702 GN=RPP2B PE=1 SV=2	--	--	--	--	--	--	--	--	--	--
Cluster-30223.0	--	--	--	--	--	--	--	--	--	--	--	--	--	--	--	--	--	--	--	--	--	--	--	--	--	--	--	--
Cluster-23276.0	--	--	--	--	--	--	--	--	--	--	--	--	--	--	--	--	--	--	--	--	--	--	--	--	--	--	--	--
Cluster-31554.0	--	--	--	--	--	--	--	--	--	--	--	--	--	--	--	--	--	--	--	--	--	--	--	--	--	--	--	--
Cluster-5034.0	--	--	--	--	--	--	--	--	--	--	--	--	--	--	--	--	--	--	--	--	--	--	--	--	--	--	--	--
Cluster-10717.0	1387812014	PWA77257.1	413	2.9e-38	F-box domain-containing protein [Artemisia annua]	--	--	--	--	--	--	--	--	--	--	--	--	--	--	--	--	--	--	--	--	--	--	--
Cluster-18697.0	--	--	--	--	--	XM_023917318.1	XM_023917318	39	1.14e-09	PREDICTED: Lactuca sativa uncharacterized LOC111921743 (LOC111921743), mRNA	--	--	--	--	--	--	--	--	--	--	--	--	--	--	--	--	--	--
Cluster-27275.1	--	--	--	--	--	--	--	--	--	--	--	--	--	--	--	--	--	--	PF03969	AFG1-like ATPase	--	--	GO:0005524	ATP binding	--	--	--	--
Cluster-29767.23324	1387794135	PWA62158.1	364	5.4e-32	dynamin central domain-containing protein [Artemisia annua]	--	--	--	--	--	K17065	DNM1L	dynamin 1-like protein	http://www.genome.jp/dbget-bin/www_bget?ko:K17065	Q8LFT2	273	7.3e-23	Dynamin-related protein 3B OS=Arabidopsis thaliana OX=3702 GN=DRP3B PE=1 SV=2	--	--	--	--	--	--	--	--	KOG0446	Vacuolar sorting protein VPS1, dynamin, and related proteins
Cluster-9284.0	--	--	--	--	--	--	--	--	--	--	--	--	--	--	--	--	--	--	--	--	--	--	--	--	--	--	--	--
Cluster-27275.0	--	--	--	--	--	--	--	--	--	--	--	--	--	--	--	--	--	--	PF08050	Tetracycline resistance leader peptide	GO:0046677	response to antibiotic	--	--	--	--	--	--
Cluster-29767.90734	--	--	--	--	--	--	--	--	--	--	--	--	--	--	--	--	--	--	--	--	--	--	--	--	--	--	--	--
Cluster-24036.1	--	--	--	--	--	--	--	--	--	--	--	--	--	--	--	--	--	--	--	--	--	--	--	--	--	--	--	--
Cluster-9876.0	--	--	--	--	--	--	--	--	--	--	--	--	--	--	--	--	--	--	--	--	--	--	--	--	--	--	--	--
Cluster-29767.5006	--	--	--	--	--	--	--	--	--	--	--	--	--	--	--	--	--	--	--	--	--	--	--	--	--	--	--	--
Cluster-29767.47780	1387810332	PWA75780.1	764	7.9e-78	RING/U-box superfamily protein [Artemisia annua]	XM_025127590.1	XM_025127590	326	3.64e-168	PREDICTED: Cynara cardunculus var. scolymus E3 ubiquitin ligase BIG BROTHER (LOC112519459), transcript variant X4, mRNA	K19045	BB	E3 ubiquitin-protein ligase BIG BROTHER and related proteins	http://www.genome.jp/dbget-bin/www_bget?ko:K19045	Q8L649	389	9.2e-36	E3 ubiquitin-protein ligase BIG BROTHER OS=Arabidopsis thaliana OX=3702 GN=BB PE=1 SV=1	PF12906//PF12678//PF05180//PF12861//PF00097	RING-variant domain//RING-H2 zinc finger domain//DNL zinc finger//Anaphase-promoting complex subunit 11 RING-H2 finger//Zinc finger, C3HC4 type (RING finger)	GO:0016567	protein ubiquitination	GO:0008270//GO:0004842//GO:0046872	zinc ion binding//ubiquitin-protein transferase activity//metal ion binding	GO:0005680	anaphase-promoting complex	--	--
Cluster-31573.0	--	--	--	--	--	--	--	--	--	--	--	--	--	--	--	--	--	--	--	--	--	--	--	--	--	--	--	--
Cluster-29767.90737	--	--	--	--	--	--	--	--	--	--	--	--	--	--	--	--	--	--	--	--	--	--	--	--	--	--	--	--
Cluster-25347.0	--	--	--	--	--	--	--	--	--	--	--	--	--	--	--	--	--	--	--	--	--	--	--	--	--	--	--	--
Cluster-29767.32288	--	--	--	--	--	--	--	--	--	--	--	--	--	--	--	--	--	--	--	--	--	--	--	--	--	--	--	--
Cluster-29767.32289	--	--	--	--	--	--	--	--	--	--	--	--	--	--	--	--	--	--	--	--	--	--	--	--	--	--	--	--
Cluster-29767.24159	1387805129	PWA71320.1	1251	8.7e-135	tetratricopeptide repeat (TPR)-like superfamily protein [Artemisia annua]	XM_022148782.1	XM_022148782	312	7.07e-161	PREDICTED: Helianthus annuus pentatricopeptide repeat-containing protein At1g63330-like (LOC110902043), mRNA	--	--	--	--	Q6NQ83	567	6.9e-57	Pentatricopeptide repeat-containing protein At3g22470, mitochondrial OS=Arabidopsis thaliana OX=3702 GN=At3g22470 PE=1 SV=1	--	--	--	--	--	--	--	--	--	--
Cluster-29767.24158	--	--	--	--	--	AB689124.1	AB689124	74	5.1e-29	Chrysanthemum x morifolium DNA, random amplified polymorphic fragment, B02NBS-1, cultivar: Jimba	--	--	--	--	--	--	--	--	--	--	--	--	--	--	--	--	--	--
Cluster-29767.24153	--	--	--	--	--	--	--	--	--	--	--	--	--	--	--	--	--	--	--	--	--	--	--	--	--	--	--	--
Cluster-29767.24152	1387814623	PWA79554.1	1509	2.2e-164	arginine--tRNA ligase, chloroplastic/mitochondrial [Artemisia annua]	--	--	--	--	--	K01887	RARS, argS	arginyl-tRNA synthetase	http://www.genome.jp/dbget-bin/www_bget?ko:K01887	Q9C713	463	1.6e-44	Arginine--tRNA ligase, cytoplasmic OS=Arabidopsis thaliana OX=3702 GN=At1g66530 PE=1 SV=1	PF03485//PF05746	Arginyl tRNA synthetase N terminal domain//DALR anticodon binding domain	GO:0006420//GO:0006560//GO:0006525	arginyl-tRNA aminoacylation//proline metabolic process//arginine metabolic process	GO:0005524//GO:0000166//GO:0004814	ATP binding//nucleotide binding//arginine-tRNA ligase activity	GO:0005737	cytoplasm	KOG4426	Arginyl-tRNA synthetase
Cluster-29767.32282	--	--	--	--	--	--	--	--	--	--	--	--	--	--	--	--	--	--	--	--	--	--	--	--	--	--	--	--
Cluster-29767.24150	1387798228	PWA65524.1	332	3.7e-28	plastid-lipid associated protein PAP / fibrillin family protein [Artemisia annua]	--	--	--	--	--	--	--	--	--	--	--	--	--	--	--	--	--	--	--	--	--	--	--
Cluster-29767.79605	1387794269	PWA62266.1	700	7.1e-71	Homeodomain-like protein [Artemisia annua]	XM_025112140.1	XM_025112140	166	1.07e-79	PREDICTED: Cynara cardunculus var. scolymus transcription factor NIGTH1-like (LOC112507515), transcript variant X2, mRNA	--	--	--	--	Q9FX84	260	2.8e-21	Transcription factor HHO6 OS=Arabidopsis thaliana OX=3702 GN=HHO6 PE=2 SV=1	PF14521	Lysine-specific metallo-endopeptidase	--	--	GO:0004222	metalloendopeptidase activity	--	--	--	--
Cluster-29767.32285	--	--	--	--	--	--	--	--	--	--	--	--	--	--	--	--	--	--	--	--	--	--	--	--	--	--	--	--
Cluster-29767.32286	--	--	--	--	--	--	--	--	--	--	--	--	--	--	--	--	--	--	--	--	--	--	--	--	--	--	--	--
Cluster-29767.79606	--	--	--	--	--	--	--	--	--	--	--	--	--	--	--	--	--	--	PF09111	SLIDE	GO:0006338	chromatin remodeling	GO:0003676//GO:0005524//GO:0016818	nucleic acid binding//ATP binding//hydrolase activity, acting on acid anhydrides, in phosphorus-containing anhydrides	GO:0005634	nucleus	--	--
Cluster-29767.24669	--	--	--	--	--	--	--	--	--	--	--	--	--	--	--	--	--	--	--	--	--	--	--	--	--	--	--	--
Cluster-20251.0	--	--	--	--	--	--	--	--	--	--	--	--	--	--	--	--	--	--	--	--	--	--	--	--	--	--	--	--
Cluster-10592.0	--	--	--	--	--	--	--	--	--	--	--	--	--	--	--	--	--	--	--	--	--	--	--	--	--	--	--	--
Cluster-29767.46358	1387827152	PWA90839.1	1188	1e-127	protein kinase-like domain, Phloem protein 2-like protein [Artemisia annua]	XM_025140913.1	XM_025140913	179	3.45e-87	PREDICTED: Cynara cardunculus var. scolymus uncharacterized LOC112529588 (LOC112529588), mRNA	--	--	--	--	Q9LX66	486	9.7e-48	Receptor-like protein kinase HERK 1 OS=Arabidopsis thaliana OX=3702 GN=HERK1 PE=1 SV=1	PF00069//PF07714	Protein kinase domain//Protein tyrosine and serine/threonine kinase	GO:0006468	protein phosphorylation	GO:0005524//GO:0004672	ATP binding//protein kinase activity	--	--	--	--
Cluster-26299.0	--	--	--	--	--	--	--	--	--	--	--	--	--	--	--	--	--	--	--	--	--	--	--	--	--	--	--	--
Cluster-29767.24581	1387777933	PWA49801.1	413	3.7e-38	hypothetical protein CTI12_AA476940 [Artemisia annua]	--	--	--	--	--	--	--	--	--	--	--	--	--	PF08496//PF08492//PF03343//PF04625//PF04277	Peptidase family S49 N-terminal//SRP72 RNA-binding domain//SART-1 family//DEC-1 protein, N-terminal region//Oxaloacetate decarboxylase, gamma chain	GO:0006525//GO:0036376//GO:0006814//GO:0007304//GO:0006560//GO:0006090//GO:0000398//GO:0006614	arginine metabolic process//sodium ion export across plasma membrane//sodium ion transport//chorion-containing eggshell formation//proline metabolic process//pyruvate metabolic process//mRNA splicing, via spliceosome//SRP-dependent cotranslational protein targeting to membrane	GO:0008948//GO:0008312//GO:0004252//GO:0005213//GO:0015081	oxaloacetate decarboxylase activity//7S RNA binding//serine-type endopeptidase activity//structural constituent of egg chorion//sodium ion transmembrane transporter activity	GO:0048500//GO:0042600//GO:0005576//GO:0005886//GO:0016020	signal recognition particle//egg chorion//extracellular region//plasma membrane//membrane	--	--
Cluster-29767.74929	976908483	KVH95701.1	216	8.3e-15	Glucose/ribitol dehydrogenase, partial [Cynara cardunculus var. scolymus]	--	--	--	--	--	--	--	--	--	P0DKC5	157	2.2e-09	11-beta-hydroxysteroid dehydrogenase 1A OS=Arabidopsis thaliana OX=3702 GN=HSD1 PE=1 SV=1	--	--	--	--	--	--	--	--	--	--
Cluster-29767.74928	1389792929	XP_024994685.1	157	3e-08	11-beta-hydroxysteroid dehydrogenase-like 4A [Cynara cardunculus var. scolymus]	--	--	--	--	--	--	--	--	--	--	--	--	--	--	--	--	--	--	--	--	--	--	--
Cluster-29767.74927	1201296363	OUZ99454.1	501	4.6e-48	Ricin B lectin domain [Macleaya cordata]	--	--	--	--	--	--	--	--	--	Q6Z4N4	423	1.9e-40	Ricin B-like lectin R40G3 OS=Oryza sativa subsp. japonica OX=39947 GN=R40G3 PE=2 SV=1	--	--	--	--	--	--	--	--	--	--
Cluster-29767.74926	1387787778	PWA57125.1	432	7e-40	hydroxyproline-rich glycoprotein family protein [Artemisia annua]	--	--	--	--	--	--	--	--	--	Q6Z4N4	304	1.9e-26	Ricin B-like lectin R40G3 OS=Oryza sativa subsp. japonica OX=39947 GN=R40G3 PE=2 SV=1	--	--	--	--	--	--	--	--	--	--
Cluster-28747.0	1387793457	PWA61612.1	296	2e-24	hypothetical protein CTI12_AA371540 [Artemisia annua]	--	--	--	--	--	K05868	CCNB	cyclin B	http://www.genome.jp/dbget-bin/www_bget?ko:K05868	O48790	200	1e-14	Cyclin-B1-4 OS=Arabidopsis thaliana OX=3702 GN=CYCB1-4 PE=2 SV=1	--	--	--	--	--	--	--	--	--	--
Cluster-29767.74924	1387823136	PWA87167.1	810	6.5e-84	nucleotide-diphospho-sugar transferase [Artemisia annua]	XM_025116050.1	XM_025116050	228	1.87e-114	PREDICTED: Cynara cardunculus var. scolymus glucomannan 4-beta-mannosyltransferase 9-like (LOC112510695), transcript variant X2, mRNA	K13680	CSLA	beta-mannan synthase	http://www.genome.jp/dbget-bin/www_bget?ko:K13680	Q9LZR3	649	1.2e-66	Glucomannan 4-beta-mannosyltransferase 9 OS=Arabidopsis thaliana OX=3702 GN=CSLA9 PE=1 SV=1	--	--	--	--	--	--	--	--	--	--
Cluster-29767.74923	1387748266	PWA34334.1	636	6.3e-64	disease resistance protein (TIR-NBS-LRR class) family [Artemisia annua]	--	--	--	--	--	--	--	--	--	--	--	--	--	PF13855//PF00560	Leucine rich repeat//Leucine Rich Repeat	--	--	GO:0005515	protein binding	--	--	--	--
Cluster-29767.74922	1387726749	PWA21988.1	559	5.3e-55	toll/interleukin-1 receptor (TIR) domain-containing protein [Artemisia annua]	--	--	--	--	--	--	--	--	--	--	--	--	--	PF13855//PF13516//PF00560	Leucine rich repeat//Leucine Rich repeat//Leucine Rich Repeat	--	--	GO:0005515	protein binding	--	--	--	--
Cluster-29767.74921	--	--	--	--	--	--	--	--	--	--	--	--	--	--	--	--	--	--	--	--	--	--	--	--	--	--	--	--
Cluster-29767.74920	1387774626	PWA47496.1	1425	7e-155	serine/threonine/dual specificity protein kinase, catalytic domain-containing protein [Artemisia annua]	XM_023906621.1	XM_023906621	524	0	PREDICTED: Lactuca sativa probable receptor-like serine/threonine-protein kinase At5g57670 (LOC111910805), mRNA	K04733	IRAK4	interleukin-1 receptor-associated kinase 4	http://www.genome.jp/dbget-bin/www_bget?ko:K04733	Q9SX31	585	6.7e-59	Proline-rich receptor-like protein kinase PERK9 OS=Arabidopsis thaliana OX=3702 GN=PERK9 PE=1 SV=1	PF00069//PF07714	Protein kinase domain//Protein tyrosine and serine/threonine kinase	GO:0006468	protein phosphorylation	GO:0005524//GO:0004672	ATP binding//protein kinase activity	--	--	--	--
Cluster-13553.0	1387752162	PWA35378.1	293	3.3e-24	reverse transcriptase domain-containing protein [Artemisia annua]	--	--	--	--	--	--	--	--	--	--	--	--	--	PF00642	Zinc finger C-x8-C-x5-C-x3-H type (and similar)	--	--	GO:0046872	metal ion binding	--	--	--	--
Cluster-29767.39228	--	--	--	--	--	--	--	--	--	--	--	--	--	--	--	--	--	--	--	--	--	--	--	--	--	--	--	--
Cluster-29767.9564	--	--	--	--	--	--	--	--	--	--	--	--	--	--	--	--	--	--	--	--	--	--	--	--	--	--	--	--
Cluster-28527.0	--	--	--	--	--	--	--	--	--	--	--	--	--	--	--	--	--	--	--	--	--	--	--	--	--	--	--	--
Cluster-20236.0	--	--	--	--	--	--	--	--	--	--	--	--	--	--	--	--	--	--	--	--	--	--	--	--	--	--	--	--
Cluster-29767.111508	--	--	--	--	--	--	--	--	--	--	--	--	--	--	--	--	--	--	--	--	--	--	--	--	--	--	--	--
Cluster-22910.0	--	--	--	--	--	--	--	--	--	--	--	--	--	--	--	--	--	--	--	--	--	--	--	--	--	--	--	--
Cluster-29767.96108	--	--	--	--	--	--	--	--	--	--	--	--	--	--	--	--	--	--	--	--	--	--	--	--	--	--	--	--
Cluster-29767.20728	--	--	--	--	--	--	--	--	--	--	--	--	--	--	--	--	--	--	--	--	--	--	--	--	--	--	--	--
Cluster-29767.20729	1387785264	PWA55190.1	461	4.2e-43	hypothetical protein CTI12_AA429660 [Artemisia annua]	--	--	--	--	--	--	--	--	--	--	--	--	--	PF00319	SRF-type transcription factor (DNA-binding and dimerisation domain)	--	--	GO:0046983//GO:0003677	protein dimerization activity//DNA binding	--	--	--	--
Cluster-29767.40942	1387763493	PWA40403.1	1584	1.8e-173	Mycolic acid cyclopropane synthase [Artemisia annua]	XM_025129138.1	XM_025129138	593	0	PREDICTED: Cynara cardunculus var. scolymus uncharacterized LOC112520683 (LOC112520683), mRNA	K00574	cfa	cyclopropane-fatty-acyl-phospholipid synthase	http://www.genome.jp/dbget-bin/www_bget?ko:K00574	P26294	133	1.2e-06	15-cis-phytoene desaturase OS=Synechococcus elongatus (strain PCC 7942) OX=1140 GN=pds PE=1 SV=1	PF07992//PF03721//PF01593//PF01494//PF00743//PF02737//PF01266	Pyridine nucleotide-disulphide oxidoreductase//UDP-glucose/GDP-mannose dehydrogenase family, NAD binding domain//Flavin containing amine oxidoreductase//FAD binding domain//Flavin-binding monooxygenase-like//3-hydroxyacyl-CoA dehydrogenase, NAD binding domain//FAD dependent oxidoreductase	GO:0006550//GO:0055114//GO:0006552//GO:0018874//GO:0006631//GO:0006568//GO:0006633//GO:0006574//GO:0006554	isoleucine catabolic process//oxidation-reduction process//leucine catabolic process//benzoate metabolic process//fatty acid metabolic process//tryptophan metabolic process//fatty acid biosynthetic process//valine catabolic process//lysine catabolic process	GO:0071949//GO:0004499//GO:0050660//GO:0003857//GO:0051287//GO:0016491//GO:0016616//GO:0050661	FAD binding//N,N-dimethylaniline monooxygenase activity//flavin adenine dinucleotide binding//3-hydroxyacyl-CoA dehydrogenase activity//NAD binding//oxidoreductase activity//oxidoreductase activity, acting on the CH-OH group of donors, NAD or NADP as acceptor//NADP binding	--	--	--	--
Cluster-29767.20724	--	--	--	--	--	--	--	--	--	--	--	--	--	--	--	--	--	--	--	--	--	--	--	--	--	--	--	--
Cluster-29767.20725	1387810341	PWA75788.1	324	6.7e-28	toll/interleukin-1 receptor (TIR) domain-containing protein [Artemisia annua]	--	--	--	--	--	--	--	--	--	--	--	--	--	--	--	--	--	--	--	--	--	--	--
Cluster-29767.20726	--	--	--	--	--	--	--	--	--	--	--	--	--	--	--	--	--	--	PF14489	QueF-like protein	GO:0008616	queuosine biosynthetic process	GO:0033739	preQ1 synthase activity	--	--	--	--
Cluster-29767.20727	--	--	--	--	--	--	--	--	--	--	--	--	--	--	--	--	--	--	--	--	--	--	--	--	--	--	--	--
Cluster-29767.20720	1387770072	PWA44441.1	2583	5e-289	Phloem protein 2-like protein [Artemisia annua]	--	--	--	--	--	--	--	--	--	Q9FN92	471	1.5e-45	Probable receptor-like protein kinase At5g59700 OS=Arabidopsis thaliana OX=3702 GN=At5g59700 PE=1 SV=1	PF09034//PF07714//PF00069	TRADD, N-terminal domain//Protein tyrosine and serine/threonine kinase//Protein kinase domain	GO:0043123//GO:0006468	positive regulation of I-kappaB kinase/NF-kappaB signaling//protein phosphorylation	GO:0005524//GO:0004672//GO:0005515	ATP binding//protein kinase activity//protein binding	--	--	--	--
Cluster-29767.20721	1387784842	PWA54873.1	517	2.1e-49	HNH endonuclease [Artemisia annua]	XM_025130277.1	XM_025130277	166	1.96e-79	PREDICTED: Cynara cardunculus var. scolymus uncharacterized LOC112521421 (LOC112521421), mRNA	--	--	--	--	--	--	--	--	--	--	--	--	--	--	--	--	--	--
Cluster-29767.20722	--	--	--	--	--	--	--	--	--	--	--	--	--	--	--	--	--	--	--	--	--	--	--	--	--	--	--	--
Cluster-29767.20723	1387819633	PWA84005.1	285	2.2e-23	DEAD-box ATP-dependent RNA helicase 5 [Artemisia annua]	--	--	--	--	--	--	--	--	--	Q9C551	177	2.8e-12	DEAD-box ATP-dependent RNA helicase 5 OS=Arabidopsis thaliana OX=3702 GN=RH5 PE=1 SV=1	PF05502//PF11744//PF10220//PF06459	Dynactin p62 family//Aluminium activated malate transporter//Smg8_Smg9//Ryanodine Receptor TM 4-6	GO:0006816//GO:0006874//GO:0000184//GO:0015743	calcium ion transport//cellular calcium ion homeostasis//nuclear-transcribed mRNA catabolic process, nonsense-mediated decay//malate transport	GO:0005219	ryanodine-sensitive calcium-release channel activity	GO:0005869//GO:0005622//GO:0016021	dynactin complex//intracellular//integral component of membrane	--	--
Cluster-29767.11886	1387814402	PWA79358.1	483	1.6e-45	hypothetical protein CTI12_AA209270 [Artemisia annua]	--	--	--	--	--	--	--	--	--	--	--	--	--	--	--	--	--	--	--	--	--	--	--
Cluster-25394.0	976916566	KVI02071.1	157	1.7e-08	F-box associated domain, type 1 [Cynara cardunculus var. scolymus]	--	--	--	--	--	--	--	--	--	--	--	--	--	--	--	--	--	--	--	--	--	--	--
Cluster-29767.75030	1387800916	PWA67771.1	215	4.2e-15	gamma-adaptin 1 [Artemisia annua]	--	--	--	--	--	K12391	AP1G1	AP-1 complex subunit gamma-1	http://www.genome.jp/dbget-bin/www_bget?ko:K12391	Q9ZUI6	130	1.1e-06	AP-1 complex subunit gamma-2 OS=Arabidopsis thaliana OX=3702 GN=At1g60070 PE=1 SV=2	--	--	--	--	--	--	--	--	--	--
Cluster-29767.75031	1387801984	PWA68662.1	144	4.5e-07	haloacid dehalogenase-like hydrolase (HAD) superfamily protein [Artemisia annua]	XM_023897132.1	XM_023897132	59	6.32e-21	PREDICTED: Lactuca sativa CTD nuclear envelope phosphatase 1 homolog (LOC111901274), mRNA	K15731	CTDSP	carboxy-terminal domain RNA polymerase II polypeptide A small phosphatase	http://www.genome.jp/dbget-bin/www_bget?ko:K15731	--	--	--	--	--	--	--	--	--	--	--	--	--	--
Cluster-29767.75036	1387762522	PWA39865.1	522	9.5e-51	haloacid dehalogenase-like hydrolase (HAD) superfamily protein [Artemisia annua]	XM_023897132.1	XM_023897132	63	5.68e-23	PREDICTED: Lactuca sativa CTD nuclear envelope phosphatase 1 homolog (LOC111901274), mRNA	K15731	CTDSP	carboxy-terminal domain RNA polymerase II polypeptide A small phosphatase	http://www.genome.jp/dbget-bin/www_bget?ko:K15731	--	--	--	--	PF05920	Homeobox KN domain	GO:0006355	regulation of transcription, DNA-templated	GO:0003677	DNA binding	--	--	--	--
Cluster-29767.75037	1387762522	PWA39865.1	282	1.9e-22	haloacid dehalogenase-like hydrolase (HAD) superfamily protein [Artemisia annua]	XM_006378596.2	XM_006378596	79	2.22e-31	PREDICTED: Populus trichocarpa CTD nuclear envelope phosphatase 1 (LOC7490326), mRNA	K15731	CTDSP	carboxy-terminal domain RNA polymerase II polypeptide A small phosphatase	http://www.genome.jp/dbget-bin/www_bget?ko:K15731	--	--	--	--	--	--	--	--	--	--	--	--	--	--
Cluster-29767.75034	1387762303	PWA39755.1	316	4.4e-26	hypothetical protein CTI12_AA569070 [Artemisia annua]	--	--	--	--	--	--	--	--	--	--	--	--	--	--	--	--	--	--	--	--	--	--	--
Cluster-29767.75035	1387803499	PWA69926.1	178	1.2e-10	secretory carrier-associated membrane protein 2 [Artemisia annua]	--	--	--	--	--	--	--	--	--	--	--	--	--	--	--	--	--	--	--	--	--	--	--
Cluster-29767.44227	1322388203	PLY80864.1	650	5.5e-65	hypothetical protein LSAT_4X162120 [Lactuca sativa]	XM_022142466.1	XM_022142466	251	7.41e-127	PREDICTED: Helianthus annuus probable esterase KAI2 (LOC110895190), mRNA	--	--	--	--	Q10J20	557	1.3e-55	Probable esterase D14L OS=Oryza sativa subsp. japonica OX=39947 GN=D14L PE=1 SV=1	--	--	--	--	--	--	--	--	--	--
Cluster-29767.44226	--	--	--	--	--	--	--	--	--	--	--	--	--	--	--	--	--	--	--	--	--	--	--	--	--	--	--	--
Cluster-29767.44225	1387827620	PWA91271.1	620	9.5e-62	hypothetical protein CTI12_AA090550 [Artemisia annua]	--	--	--	--	--	--	--	--	--	--	--	--	--	--	--	--	--	--	--	--	--	--	--
Cluster-29767.44224	--	--	--	--	--	--	--	--	--	--	--	--	--	--	--	--	--	--	--	--	--	--	--	--	--	--	--	--
Cluster-29767.44223	--	--	--	--	--	--	--	--	--	--	--	--	--	--	--	--	--	--	--	--	--	--	--	--	--	--	--	--
Cluster-29767.96107	--	--	--	--	--	--	--	--	--	--	--	--	--	--	--	--	--	--	--	--	--	--	--	--	--	--	--	--
Cluster-29767.44221	1387794308	PWA62296.1	1978	5e-219	calcineurin-like metallo-phosphoesterase superfamily protein [Artemisia annua]	XM_025118508.1	XM_025118508	722	0	PREDICTED: Cynara cardunculus var. scolymus shewanella-like protein phosphatase 1 (LOC112512512), mRNA	--	--	--	--	Q8L774	1425	2.5e-156	Shewanella-like protein phosphatase 1 OS=Arabidopsis thaliana OX=3702 GN=SLP1 PE=1 SV=1	PF00149	Calcineurin-like phosphoesterase	--	--	GO:0016787	hydrolase activity	--	--	--	--
Cluster-9995.0	--	--	--	--	--	--	--	--	--	--	--	--	--	--	--	--	--	--	--	--	--	--	--	--	--	--	--	--
Cluster-30393.0	--	--	--	--	--	--	--	--	--	--	--	--	--	--	--	--	--	--	--	--	--	--	--	--	--	--	--	--
Cluster-29767.2941	--	--	--	--	--	--	--	--	--	--	--	--	--	--	--	--	--	--	--	--	--	--	--	--	--	--	--	--
Cluster-15963.0	--	--	--	--	--	--	--	--	--	--	--	--	--	--	--	--	--	--	--	--	--	--	--	--	--	--	--	--
Cluster-29767.96106	1387801933	PWA68621.1	305	2.1e-25	endopeptidase, NLPC/P60 domain, LRAT-like domain protein [Artemisia annua]	--	--	--	--	--	--	--	--	--	--	--	--	--	--	--	--	--	--	--	--	--	--	--
Cluster-31699.0	--	--	--	--	--	--	--	--	--	--	--	--	--	--	--	--	--	--	--	--	--	--	--	--	--	--	--	--
Cluster-32238.0	--	--	--	--	--	--	--	--	--	--	--	--	--	--	--	--	--	--	--	--	--	--	--	--	--	--	--	--
Cluster-29767.92399	1387829370	PWA92889.1	1641	6.3e-180	zinc finger, CCHC-type [Artemisia annua]	LR031573.1	LR031573	38	1.75e-08	Brassica rapa genome, scaffold: A02	--	--	--	--	P10978	507	7.4e-50	Retrovirus-related Pol polyprotein from transposon TNT 1-94 OS=Nicotiana tabacum OX=4097 PE=2 SV=1	PF04116//PF00665//PF13683//PF08782	Fatty acid hydroxylase superfamily//Integrase core domain//Integrase core domain//c-SKI Smad4 binding domain	GO:0008610//GO:0055114//GO:0015074	lipid biosynthetic process//oxidation-reduction process//DNA integration	GO:0016491//GO:0005506//GO:0046332	oxidoreductase activity//iron ion binding//SMAD binding	--	--	--	--
Cluster-29767.96101	--	--	--	--	--	--	--	--	--	--	--	--	--	--	--	--	--	--	--	--	--	--	--	--	--	--	--	--
Cluster-29767.111501	--	--	--	--	--	--	--	--	--	--	--	--	--	--	--	--	--	--	PF02178	AT hook motif	--	--	GO:0003677	DNA binding	--	--	--	--
Cluster-29767.9562	1387797645	PWA65034.1	856	4.6e-89	peptidase T2, asparaginase 2, nucleophile aminohydrolase [Artemisia annua]	--	--	--	--	--	K13051	iaaA, ASRGL1	beta-aspartyl-peptidase (threonine type)	http://www.genome.jp/dbget-bin/www_bget?ko:K13051	Q8GXG1	642	1.2e-65	Probable isoaspartyl peptidase/L-asparaginase 2 OS=Arabidopsis thaliana OX=3702 GN=At3g16150 PE=2 SV=2	PF01112//PF16672	Asparaginase//Ragulator complex protein LAMTOR5	GO:0043066//GO:0019079//GO:0043154	negative regulation of apoptotic process//viral genome replication//negative regulation of cysteine-type endopeptidase activity involved in apoptotic process	GO:0016787	hydrolase activity	GO:0071986//GO:0005737	Ragulator complex//cytoplasm	KOG1593	Asparaginase
Cluster-29767.111502	--	--	--	--	--	--	--	--	--	--	--	--	--	--	--	--	--	--	--	--	--	--	--	--	--	--	--	--
Cluster-3558.0	--	--	--	--	--	--	--	--	--	--	--	--	--	--	A8M5E6	129	1e-06	Glutamyl-tRNA(Gln) amidotransferase subunit A OS=Salinispora arenicola (strain CNS-205) OX=391037 GN=gatA PE=3 SV=1	--	--	--	--	--	--	--	--	--	--
Cluster-23135.0	--	--	--	--	--	--	--	--	--	--	--	--	--	--	--	--	--	--	--	--	--	--	--	--	--	--	--	--
Cluster-23135.1	--	--	--	--	--	--	--	--	--	--	--	--	--	--	--	--	--	--	--	--	--	--	--	--	--	--	--	--
Cluster-29767.81600	1322363057	PLY68579.1	262	1.7e-20	hypothetical protein LSAT_2X10320 [Lactuca sativa]	--	--	--	--	--	--	--	--	--	--	--	--	--	--	--	--	--	--	--	--	--	--	--
Cluster-29767.41769	1387748196	PWA34314.1	331	6.3e-28	hypothetical protein CTI12_AA620320 [Artemisia annua]	XM_018964554.1	XM_018964554	48	6.14e-14	PREDICTED: Juglans regia pentatricopeptide repeat-containing protein At4g02750-like (LOC108990553), transcript variant X2, mRNA	--	--	--	--	Q9SI53	170	1.1e-10	Pentatricopeptide repeat-containing protein At2g03880, mitochondrial OS=Arabidopsis thaliana OX=3702 GN=PCMP-H44 PE=2 SV=1	PF14432	DYW family of nucleic acid deaminases	--	--	GO:0008270	zinc ion binding	--	--	--	--
Cluster-29767.41768	1389778345	XP_024989960.1	428	2.1e-39	serine/threonine-protein kinase phg2-like [Cynara cardunculus var. scolymus]	--	--	--	--	--	--	--	--	--	Q9SII6	272	9.9e-23	Probable serine/threonine-protein kinase PIX13 OS=Arabidopsis thaliana OX=3702 GN=PIX13 PE=1 SV=2	PF07714//PF00069	Protein tyrosine and serine/threonine kinase//Protein kinase domain	GO:0006468	protein phosphorylation	GO:0005524//GO:0004672	ATP binding//protein kinase activity	--	--	--	--
Cluster-15615.0	1559668804	RWW90881.1	577	5.1e-57	hypothetical protein BHE74_00002024 [Ensete ventricosum]	--	--	--	--	--	K00284	E1.4.7.1	glutamate synthase (ferredoxin)	http://www.genome.jp/dbget-bin/www_bget?ko:K00284	O34849	299	3.3e-26	Glutamate synthase large subunit-like protein YerD OS=Bacillus subtilis (strain 168) OX=224308 GN=yerD PE=3 SV=1	PF01645//PF04898//PF01070	Conserved region in glutamate synthase//Glutamate synthase central domain//FMN-dependent dehydrogenase	GO:0055114//GO:0006537//GO:0006807	oxidation-reduction process//glutamate biosynthetic process//nitrogen compound metabolic process	GO:0016491//GO:0016638//GO:0015930	oxidoreductase activity//oxidoreductase activity, acting on the CH-NH2 group of donors//glutamate synthase activity	--	--	KOG0399	Glutamate synthase
Cluster-29767.41761	--	--	--	--	--	--	--	--	--	--	--	--	--	--	--	--	--	--	--	--	--	--	--	--	--	--	--	--
Cluster-29767.41760	1191653089	OTG05061.1	1392	3.2e-151	putative sugar phosphate transporter domain-containing protein [Helianthus annuus]	XM_022121574.1	XM_022121574	514	0	PREDICTED: Helianthus annuus probable sugar phosphate/phosphate translocator At3g11320 (LOC110872712), mRNA	--	--	--	--	Q5XF09	1341	1e-146	Probable sugar phosphate/phosphate translocator At3g11320 OS=Arabidopsis thaliana OX=3702 GN=At3g11320 PE=2 SV=1	PF08449//PF00892	UAA transporter family//EamA-like transporter family	GO:0055085	transmembrane transport	--	--	GO:0016020//GO:0016021	membrane//integral component of membrane	--	--
Cluster-29767.41763	1387799974	PWA66986.1	1343	1.8e-145	Zinc finger, FYVE/PHD-type [Artemisia annua]	XM_025110584.1	XM_025110584	272	1.18e-138	PREDICTED: Cynara cardunculus var. scolymus ABC transporter F family member 4 (LOC112506493), mRNA	--	--	--	--	Q23541	134	1.1e-06	Lysine-specific demethylase rbr-2 OS=Caenorhabditis elegans OX=6239 GN=rbr-2 PE=1 SV=2	PF12861	Anaphase-promoting complex subunit 11 RING-H2 finger	GO:0016567	protein ubiquitination	GO:0004842	ubiquitin-protein transferase activity	GO:0005680	anaphase-promoting complex	--	--
Cluster-29767.41762	1322374542	PLY74095.1	413	3.5e-38	hypothetical protein LSAT_9X11221 [Lactuca sativa]	XM_023877633.1	XM_023877633	201	9.23e-100	PREDICTED: Lactuca sativa chaperonin CPN60-2, mitochondrial (LOC111881218), mRNA	K04077	groEL, HSPD1	chaperonin GroEL	http://www.genome.jp/dbget-bin/www_bget?ko:K04077	Q05046	398	7.4e-38	Chaperonin CPN60-2, mitochondrial OS=Cucurbita maxima OX=3661 GN=CPN60-2 PE=1 SV=1	--	--	--	--	--	--	--	--	KOG0356	Mitochondrial chaperonin, Cpn60/Hsp60p
Cluster-29767.41765	--	--	--	--	--	--	--	--	--	--	--	--	--	--	--	--	--	--	--	--	--	--	--	--	--	--	--	--
Cluster-29767.41764	1387799974	PWA66986.1	1011	9.9e-107	Zinc finger, FYVE/PHD-type [Artemisia annua]	XM_022118455.1	XM_022118455	78	1.44e-30	PREDICTED: Helianthus annuus RNA polymerase-associated protein LEO1-like (LOC110869155), transcript variant X2, mRNA	--	--	--	--	Q9V8P9	137	8.4e-07	E3 ubiquitin-protein ligase Topors OS=Drosophila melanogaster OX=7227 GN=Topors PE=1 SV=1	PF16685//PF12678//PF00097//PF12861//PF03854	zinc RING finger of MSL2//RING-H2 zinc finger domain//Zinc finger, C3HC4 type (RING finger)//Anaphase-promoting complex subunit 11 RING-H2 finger//P-11 zinc finger	GO:0016567	protein ubiquitination	GO:0008270//GO:0003723//GO:0004842//GO:0061630//GO:0046872	zinc ion binding//RNA binding//ubiquitin-protein transferase activity//ubiquitin protein ligase activity//metal ion binding	GO:0005680	anaphase-promoting complex	--	--
Cluster-29767.41767	--	--	--	--	--	--	--	--	--	--	--	--	--	--	--	--	--	--	--	--	--	--	--	--	--	--	--	--
Cluster-29767.41766	1387788897	PWA58003.1	153	1e-07	core-2/I-branching beta-1,6-N-acetylglucosaminyltransferase family protein [Artemisia annua]	--	--	--	--	--	--	--	--	--	--	--	--	--	--	--	--	--	--	--	--	--	--	--
Cluster-29767.92390	--	--	--	--	--	--	--	--	--	--	--	--	--	--	--	--	--	--	--	--	--	--	--	--	--	--	--	--
Cluster-29767.8881	1387804297	PWA70601.1	4345	0	DNA helicase, ATP-dependent, RecQ type [Artemisia annua]	XM_022119413.1	XM_022119413	1261	0	PREDICTED: Helianthus annuus ATP-dependent DNA helicase RecQ-like (LOC110870212), mRNA	K03654	recQ	ATP-dependent DNA helicase RecQ	http://www.genome.jp/dbget-bin/www_bget?ko:K03654	Q9CL21	966	8.5e-103	ATP-dependent DNA helicase RecQ OS=Pasteurella multocida (strain Pm70) OX=272843 GN=recQ PE=3 SV=1	PF00570//PF04851//PF09382//PF00270	HRDC domain//Type III restriction enzyme, res subunit//RQC domain//DEAD/DEAH box helicase	GO:0006281//GO:0006260	DNA repair//DNA replication	GO:0005524//GO:0016787//GO:0003676//GO:0003677//GO:0043138	ATP binding//hydrolase activity//nucleic acid binding//DNA binding//3'-5' DNA helicase activity	GO:0005657	replication fork	KOG0351	ATP-dependent DNA helicase
Cluster-29767.54191	1387786528	PWA56166.1	1702	4.4e-187	FMN-linked oxidoreductases superfamily protein [Artemisia annua]	XM_022157297.1	XM_022157297	566	0	PREDICTED: Helianthus annuus tRNA-dihydrouridine(16/17) synthase [NAD(P)(+)]-like (LOC110912543), mRNA	K05542	DUS1	tRNA-dihydrouridine synthase 1	http://www.genome.jp/dbget-bin/www_bget?ko:K05542	Q6P1R4	718	2.1e-74	tRNA-dihydrouridine(16/17) synthase [NAD(P)(+)]-like OS=Homo sapiens OX=9606 GN=DUS1L PE=1 SV=1	PF00977//PF04309//PF03060//PF01207//PF01180	Histidine biosynthesis protein//Glycerol-3-phosphate responsive antiterminator//Nitronate monooxygenase//Dihydrouridine synthase (Dus)//Dihydroorotate dehydrogenase	GO:0006807//GO:0006355//GO:0055114//GO:0000105//GO:0008033//GO:0006071	nitrogen compound metabolic process//regulation of transcription, DNA-templated//oxidation-reduction process//histidine biosynthetic process//tRNA processing//glycerol metabolic process	GO:0050660//GO:0018580//GO:0017150//GO:0016627	flavin adenine dinucleotide binding//nitronate monooxygenase activity//tRNA dihydrouridine synthase activity//oxidoreductase activity, acting on the CH-CH group of donors	GO:0005737	cytoplasm	KOG2335	tRNA-dihydrouridine synthase
Cluster-10797.0	--	--	--	--	--	--	--	--	--	--	--	--	--	--	--	--	--	--	PF00745	Glutamyl-tRNAGlu reductase, dimerisation domain	GO:0055114//GO:0033014	oxidation-reduction process//tetrapyrrole biosynthetic process	GO:0050661//GO:0008883	NADP binding//glutamyl-tRNA reductase activity	--	--	--	--
Cluster-29767.2948	--	--	--	--	--	--	--	--	--	--	--	--	--	--	--	--	--	--	--	--	--	--	--	--	--	--	--	--
Cluster-29767.5715	--	--	--	--	--	--	--	--	--	--	--	--	--	--	--	--	--	--	--	--	--	--	--	--	--	--	--	--
Cluster-1953.0	--	--	--	--	--	XM_018387589.1	XM_018387589	534	0	Fusarium oxysporum f. sp. lycopersici 4287 hypothetical protein mRNA	--	--	--	--	--	--	--	--	--	--	--	--	--	--	--	--	--	--
Cluster-29767.54429	--	--	--	--	--	--	--	--	--	--	--	--	--	--	--	--	--	--	--	--	--	--	--	--	--	--	--	--
Cluster-29767.40941	1387804007	PWA70355.1	157	4.5e-08	traB domain-containing protein [Artemisia annua]	XM_025134335.1	XM_025134335	71	4.7e-27	PREDICTED: Cynara cardunculus var. scolymus traB domain-containing protein-like (LOC112524492), mRNA	--	--	--	--	--	--	--	--	--	--	--	--	--	--	--	--	--	--
Cluster-29767.90002	--	--	--	--	--	--	--	--	--	--	--	--	--	--	--	--	--	--	--	--	--	--	--	--	--	--	--	--
Cluster-29767.90003	1387799706	PWA66764.1	809	1.3e-83	ankyrin repeat family protein [Artemisia annua]	XM_020692551.1	XM_020692551	37	4.33e-08	PREDICTED: Sesamum indicum NADP-specific glutamate dehydrogenase (LOC105157721), transcript variant X3, mRNA	--	--	--	--	--	--	--	--	--	--	--	--	--	--	--	--	--	--
Cluster-29767.9560	--	--	--	--	--	--	--	--	--	--	--	--	--	--	--	--	--	--	--	--	--	--	--	--	--	--	--	--
Cluster-148.0	1344082833	XP_023925431.1	606	2.6e-60	uncharacterized protein LOC112036840 [Quercus suber]	XM_018387481.1	XM_018387481	656	0	Fusarium oxysporum f. sp. lycopersici 4287 hypothetical protein mRNA	--	--	--	--	E5AE42	624	8.1e-64	Zinc-type alcohol dehydrogenase-like protein YogA OS=Leptosphaeria maculans (strain JN3 / isolate v23.1.3 / race Av1-4-5-6-7-8) OX=985895 GN=Yog1 PE=2 SV=1	PF00107	Zinc-binding dehydrogenase	GO:0055114	oxidation-reduction process	--	--	--	--	--	--
Cluster-29767.40418	1387796477	PWA64070.1	984	5.5e-104	BTB/POZ/MATH-domains containing protein [Artemisia annua]	--	--	--	--	--	K10523	SPOP	speckle-type POZ protein	http://www.genome.jp/dbget-bin/www_bget?ko:K10523	O22286	565	8e-57	BTB/POZ and MATH domain-containing protein 3 OS=Arabidopsis thaliana OX=3702 GN=BPM3 PE=1 SV=1	PF00651//PF00917	BTB/POZ domain//MATH domain	--	--	GO:0005515	protein binding	--	--	KOG1987	Speckle-type POZ protein SPOP and related proteins with TRAF, MATH and BTB/POZ domains
Cluster-29767.40419	1387828872	PWA92427.1	197	6.7e-13	uvrABC system, subunit B [Artemisia annua]	--	--	--	--	--	K12823	DDX5, DBP2	ATP-dependent RNA helicase DDX5/DBP2	http://www.genome.jp/dbget-bin/www_bget?ko:K12823	Q5N7W4	164	1.7e-10	DEAD-box ATP-dependent RNA helicase 30 OS=Oryza sativa subsp. japonica OX=39947 GN=Os01g0911100 PE=2 SV=2	--	--	--	--	--	--	--	--	KOG0331	ATP-dependent RNA helicase
Cluster-3553.0	--	--	--	--	--	--	--	--	--	--	--	--	--	--	--	--	--	--	--	--	--	--	--	--	--	--	--	--
Cluster-28843.0	--	--	--	--	--	--	--	--	--	--	--	--	--	--	--	--	--	--	--	--	--	--	--	--	--	--	--	--
Cluster-29767.40410	--	--	--	--	--	JF940498.1	JF940498	88	9.4e-37	Chrysanthemum oreastrum clone a chrysanthemyl diphosphate synthase (CDS) gene, exons 5 through 10 and partial cds &amp;&amp; JF940499.1 Chrysanthemum oreastrum clone b chrysanthemyl diphosphate synthase (CDS) gene, exons 5 through 10 and partial cds &amp;&amp; JF940500.1 Chrysanthemum oreastrum clone c chrysanthemyl diphosphate synthase (CDS) gene, exons 5 through 10 and partial cds &amp;&amp; JF…	--	--	--	--	--	--	--	--	--	--	--	--	--	--	--	--	--	--
Cluster-29767.40411	1387802613	PWA69194.1	572	8.5e-56	2-oxoglutarate (2OG) and Fe(II)-dependent oxygenase superfamily protein [Artemisia annua]	--	--	--	--	--	--	--	--	--	Q944Z5	278	4e-23	Probable 2-oxoglutarate-dependent dioxygenase AOP1 (Fragment) OS=Arabidopsis thaliana OX=3702 GN=AOP1 PE=2 SV=1	PF02609//PF03171	Exonuclease VII small subunit//2OG-Fe(II) oxygenase superfamily	GO:0055114//GO:0006308	oxidation-reduction process//DNA catabolic process	GO:0008855//GO:0016491	exodeoxyribonuclease VII activity//oxidoreductase activity	GO:0009318	exodeoxyribonuclease VII complex	--	--
Cluster-29767.40412	1387759887	PWA38521.1	290	1.1e-23	serine/threonine/dual specificity protein kinase, catalytic domain-containing protein [Artemisia annua]	--	--	--	--	--	--	--	--	--	P27450	205	2.9e-15	Probable serine/threonine-protein kinase CST OS=Arabidopsis thaliana OX=3702 GN=CST PE=1 SV=2	PF00069//PF07714	Protein kinase domain//Protein tyrosine and serine/threonine kinase	GO:0006468	protein phosphorylation	GO:0005524//GO:0004672	ATP binding//protein kinase activity	--	--	--	--
Cluster-29767.40413	1387762239	PWA39717.1	658	2.2e-66	heat stress transcription factor HSFA9 [Artemisia annua]	AY099451.1	AY099451	116	2.73e-52	Helianthus annuus heat stress transcription factor HSFA9 mRNA, complete cds	K09419	HSFF	heat shock transcription factor, other eukaryote	http://www.genome.jp/dbget-bin/www_bget?ko:K09419	Q6F388	310	1.9e-27	Heat stress transcription factor A-2e OS=Oryza sativa subsp. japonica OX=39947 GN=HSFA2E PE=2 SV=1	PF00178//PF00447	Ets-domain//HSF-type DNA-binding	GO:0006355	regulation of transcription, DNA-templated	GO:0043565//GO:0003700	sequence-specific DNA binding//DNA-binding transcription factor activity	GO:0005667//GO:0042025	transcription regulator complex//host cell nucleus	--	--
Cluster-29767.40414	1191651823	OTG03795.1	1199	7.8e-129	putative ribonuclease H-like domain-containing protein [Helianthus annuus]	--	--	--	--	--	--	--	--	--	P10978	515	6.1e-51	Retrovirus-related Pol polyprotein from transposon TNT 1-94 OS=Nicotiana tabacum OX=4097 PE=2 SV=1	PF00665//PF13683	Integrase core domain//Integrase core domain	GO:0015074	DNA integration	--	--	--	--	--	--
Cluster-29767.40415	--	--	--	--	--	--	--	--	--	--	--	--	--	--	--	--	--	--	--	--	--	--	--	--	--	--	--	--
Cluster-29767.40416	1389778640	XP_024990053.1	1611	2.6e-176	BTB/POZ and MATH domain-containing protein 3 isoform X2 [Cynara cardunculus var. scolymus]	XM_025134285.1	XM_025134285	534	0	PREDICTED: Cynara cardunculus var. scolymus BTB/POZ and MATH domain-containing protein 3 (LOC112524463), transcript variant X2, mRNA	K10523	SPOP	speckle-type POZ protein	http://www.genome.jp/dbget-bin/www_bget?ko:K10523	O22286	1217	4.7e-132	BTB/POZ and MATH domain-containing protein 3 OS=Arabidopsis thaliana OX=3702 GN=BPM3 PE=1 SV=1	PF00651//PF00917	BTB/POZ domain//MATH domain	--	--	GO:0005515	protein binding	--	--	KOG1987	Speckle-type POZ protein SPOP and related proteins with TRAF, MATH and BTB/POZ domains
Cluster-29767.73319	1387803042	PWA69547.1	3049	0	CMP/dCMP deaminase, zinc-binding [Artemisia annua]	XM_022120911.1	XM_022120911	407	0	PREDICTED: Helianthus annuus tRNA(adenine(34)) deaminase, chloroplastic-like (LOC110872134), transcript variant X1, mRNA	K11991	tadA	tRNA(adenine34) deaminase	http://www.genome.jp/dbget-bin/www_bget?ko:K11991	Q9S7I0	835	2e-87	tRNA(adenine(34)) deaminase, chloroplastic OS=Arabidopsis thaliana OX=3702 GN=TADA PE=1 SV=1	PF14437	MafB19-like deaminase	GO:0006807//GO:0002100	nitrogen compound metabolic process//tRNA wobble adenosine to inosine editing	GO:0008251	tRNA-specific adenosine deaminase activity	--	--	KOG1018	Cytosine deaminase FCY1 and related enzymes
Cluster-29767.64761	1387793103	PWA61323.1	1476	1e-160	ribosomal protein 1 [Artemisia annua]	XM_022131496.1	XM_022131496	661	0	PREDICTED: Helianthus annuus 60S ribosomal protein L3-1-like (LOC110883846), transcript variant X2, mRNA	K02925	RP-L3e, RPL3	large subunit ribosomal protein L3e	http://www.genome.jp/dbget-bin/www_bget?ko:K02925	P17094	1365	2.9e-149	60S ribosomal protein L3-1 OS=Arabidopsis thaliana OX=3702 GN=ARP1 PE=1 SV=5	PF00297	Ribosomal protein L3	GO:0042254//GO:0006412	ribosome biogenesis//translation	GO:0003735	structural constituent of ribosome	GO:0005840	ribosome	KOG0746	60S ribosomal protein L3 and related proteins
Cluster-28942.1	1387819197	PWA83614.1	721	1.5e-73	DNA-binding WRKY [Artemisia annua]	KY640220.1	KY640220	42	5.09e-11	Cymbidium sinense clone 788 WRKY transcription factor 51-like mRNA, complete cds	--	--	--	--	Q8VWQ5	275	2.9e-23	Probable WRKY transcription factor 50 OS=Arabidopsis thaliana OX=3702 GN=WRKY50 PE=2 SV=1	PF03106	WRKY DNA -binding domain	GO:0006355	regulation of transcription, DNA-templated	GO:0003700//GO:0043565	DNA-binding transcription factor activity//sequence-specific DNA binding	GO:0005667	transcription regulator complex	--	--
Cluster-28942.0	1387782670	PWA53243.1	392	1.6e-35	reverse transcriptase domain, Reverse transcriptase zinc-binding domain protein [Artemisia annua]	--	--	--	--	--	--	--	--	--	--	--	--	--	--	--	--	--	--	--	--	--	--	--
Cluster-30163.1	1387773853	PWA46969.1	243	1.6e-18	Concanavalin A-like lectin/glucanase, subgroup [Artemisia annua]	--	--	--	--	--	--	--	--	--	--	--	--	--	--	--	--	--	--	--	--	--	--	--
Cluster-30163.0	1387773853	PWA46969.1	1049	2.3e-111	Concanavalin A-like lectin/glucanase, subgroup [Artemisia annua]	XM_022124967.1	XM_022124967	335	1.14e-173	PREDICTED: Helianthus annuus probable serine/threonine-protein kinase PBL18 (LOC110876806), mRNA	K04733	IRAK4	interleukin-1 receptor-associated kinase 4	http://www.genome.jp/dbget-bin/www_bget?ko:K04733	O49839	800	6.5e-84	Probable serine/threonine-protein kinase PBL2 OS=Arabidopsis thaliana OX=3702 GN=PBL2 PE=1 SV=1	PF00069//PF07714	Protein kinase domain//Protein tyrosine and serine/threonine kinase	GO:0006468	protein phosphorylation	GO:0004672//GO:0005524	protein kinase activity//ATP binding	--	--	--	--
Cluster-29767.9561	--	--	--	--	--	--	--	--	--	--	--	--	--	--	--	--	--	--	--	--	--	--	--	--	--	--	--	--
Cluster-1557.0	1344052844	XP_023909709.1	365	1.2e-32	jmjC domain-containing protein 7-like [Quercus suber]	XM_018378256.1	XM_018378256	313	4.59e-162	Fusarium oxysporum f. sp. lycopersici 4287 hypothetical protein mRNA	K19219	JMJD7	jumonji domain-containing protein 7	http://www.genome.jp/dbget-bin/www_bget?ko:K19219	P0C872	222	1.7e-17	Bifunctional peptidase and (3S)-lysyl hydroxylase Jmjd7 OS=Mus musculus OX=10090 GN=Jmjd7 PE=1 SV=1	--	--	--	--	--	--	--	--	KOG2508	Predicted phospholipase
Cluster-29767.54421	1387800329	PWA67281.1	1378	3.4e-149	Protein kinase, ATP binding site-containing protein [Artemisia annua]	FJ605120.1	FJ605120	628	0	Chrysanthemum x morifolium dehydration-responsive element-binding factor 1 (DREB1A-1) mRNA, complete cds	--	--	--	--	Q9FJ93	429	1.4e-40	Dehydration-responsive element-binding protein 1D OS=Arabidopsis thaliana OX=3702 GN=DREB1D PE=2 SV=1	PF06455//PF00847	NADH dehydrogenase subunit 5 C-terminus//AP2 domain	GO:0006814//GO:0042773//GO:0006120//GO:0006744//GO:0055114//GO:0006355	sodium ion transport//ATP synthesis coupled electron transport//mitochondrial electron transport, NADH to ubiquinone//ubiquinone biosynthetic process//oxidation-reduction process//regulation of transcription, DNA-templated	GO:0008137//GO:0003700	NADH dehydrogenase (ubiquinone) activity//DNA-binding transcription factor activity	GO:0005667	transcription regulator complex	--	--
Cluster-30032.0	--	--	--	--	--	--	--	--	--	--	--	--	--	--	--	--	--	--	PF03412	Peptidase C39 family	GO:0006508	proteolysis	GO:0008233//GO:0005524	peptidase activity//ATP binding	GO:0016021	integral component of membrane	--	--
Cluster-32629.0	--	--	--	--	--	--	--	--	--	--	--	--	--	--	--	--	--	--	--	--	--	--	--	--	--	--	--	--
Cluster-29767.87619	--	--	--	--	--	--	--	--	--	--	--	--	--	--	--	--	--	--	--	--	--	--	--	--	--	--	--	--
Cluster-3203.0	--	--	--	--	--	--	--	--	--	--	--	--	--	--	--	--	--	--	--	--	--	--	--	--	--	--	--	--
Cluster-29767.87613	1387806891	PWA72819.1	328	4.1e-28	gamma-thionin [Artemisia annua]	XM_002510375.3	XM_002510375	42	3.7e-11	PREDICTED: Ricinus communis defensin-like protein 19 (LOC8288963), mRNA	--	--	--	--	P82787	229	4.7e-18	Defensin-like protein 19 OS=Arabidopsis thaliana OX=3702 GN=PDF1.4 PE=3 SV=2	PF00537	Scorpion toxin-like domain	GO:0009405//GO:0006810	pathogenesis//transport	GO:0008200//GO:0019871	ion channel inhibitor activity//sodium channel inhibitor activity	GO:0005576	extracellular region	--	--
Cluster-29767.87612	--	--	--	--	--	--	--	--	--	--	--	--	--	--	--	--	--	--	--	--	--	--	--	--	--	--	--	--
Cluster-29767.87611	--	--	--	--	--	XM_025141229.1	XM_025141229	65	4.59e-24	PREDICTED: Cynara cardunculus var. scolymus beta-adaptin-like protein C (LOC112529822), mRNA	--	--	--	--	--	--	--	--	--	--	--	--	--	--	--	--	--	--
Cluster-29767.87610	1387771816	PWA45591.1	479	4.4e-45	hypothetical protein CTI12_AA516330 [Artemisia annua]	XM_022154624.1	XM_022154624	102	5.9e-44	PREDICTED: Helianthus annuus septin and tuftelin-interacting protein 1 homolog 1 (LOC110909889), mRNA	K13103	TFIP11	tuftelin-interacting protein 11	http://www.genome.jp/dbget-bin/www_bget?ko:K13103	Q9SHG6	230	1.2e-17	Septin and tuftelin-interacting protein 1 homolog 1 OS=Arabidopsis thaliana OX=3702 GN=STIPL1 PE=1 SV=1	--	--	--	--	--	--	--	--	--	--
Cluster-29767.87617	--	--	--	--	--	--	--	--	--	--	--	--	--	--	--	--	--	--	--	--	--	--	--	--	--	--	--	--
Cluster-29767.87616	1387776077	PWA48505.1	254	2.3e-19	hypothetical protein CTI12_AA420800 [Artemisia annua]	XM_025104143.1	XM_025104143	119	8.68e-54	PREDICTED: Cynara cardunculus var. scolymus AP-5 complex subunit zeta-1 (LOC112500621), mRNA	K19025	AP5Z1, SPG48	AP-5 complex subunit zeta-1	http://www.genome.jp/dbget-bin/www_bget?ko:K19025	--	--	--	--	PF07702	UTRA domain	GO:0006355	regulation of transcription, DNA-templated	GO:0003677	DNA binding	--	--	--	--
Cluster-29767.87615	1387793181	PWA61388.1	2114	9.6e-235	Ankyrin repeat-containing protein [Artemisia annua]	XM_023913371.1	XM_023913371	408	0	PREDICTED: Lactuca sativa ankyrin repeat domain-containing protein 13C (LOC111917700), mRNA	K21437	-	-	http://www.genome.jp/dbget-bin/www_bget?ko:K21437	Q5F259	229	1.4e-17	Ankyrin repeat domain-containing protein 13B OS=Mus musculus OX=10090 GN=Ankrd13b PE=2 SV=1	--	--	--	--	--	--	--	--	KOG0522	Ankyrin repeat protein
Cluster-29767.87614	976920605	KVI05324.1	821	4.4e-85	Phosphoenolpyruvate carboxylase [Cynara cardunculus var. scolymus]	XM_025135501.1	XM_025135501	396	0	PREDICTED: Cynara cardunculus var. scolymus phosphoenolpyruvate carboxylase 4-like (LOC112525386), mRNA	K01595	ppc	phosphoenolpyruvate carboxylase	http://www.genome.jp/dbget-bin/www_bget?ko:K01595	Q8GVE8	624	1.2e-63	Phosphoenolpyruvate carboxylase 4 OS=Arabidopsis thaliana OX=3702 GN=PPC4 PE=2 SV=1	PF02899//PF05746//PF00311	Phage integrase, N-terminal SAM-like domain//DALR anticodon binding domain//Phosphoenolpyruvate carboxylase	GO:0006525//GO:0019643//GO:0006094//GO:0015074//GO:0006099//GO:0015977//GO:0006420//GO:0006560	arginine metabolic process//reductive tricarboxylic acid cycle//gluconeogenesis//DNA integration//tricarboxylic acid cycle//carbon fixation//arginyl-tRNA aminoacylation//proline metabolic process	GO:0003677//GO:0004814//GO:0008964//GO:0005524	DNA binding//arginine-tRNA ligase activity//phosphoenolpyruvate carboxylase activity//ATP binding	--	--	--	--
Cluster-29767.43994	--	--	--	--	--	--	--	--	--	--	--	--	--	--	--	--	--	--	--	--	--	--	--	--	--	--	--	--
Cluster-29767.21972	1387764148	PWA40786.1	612	2.8e-61	alcohol dehydrogenase [Artemisia annua]	XM_025132618.1	XM_025132618	133	5.5e-62	PREDICTED: Cynara cardunculus var. scolymus NADPH-dependent aldo-keto reductase, chloroplastic-like (LOC112523143), transcript variant X2, mRNA	--	--	--	--	Q0PGJ6	294	8e-26	NADPH-dependent aldo-keto reductase, chloroplastic OS=Arabidopsis thaliana OX=3702 GN=AKR4C9 PE=1 SV=1	--	--	--	--	--	--	--	--	KOG1577	Aldo/keto reductase family proteins
Cluster-29767.43996	--	--	--	--	--	--	--	--	--	--	--	--	--	--	--	--	--	--	--	--	--	--	--	--	--	--	--	--
Cluster-29767.5680	1389829324	XP_024979948.1	299	5.8e-25	serine carboxypeptidase-like 13 isoform X1 [Cynara cardunculus var. scolymus]	XM_022129632.1	XM_022129632	56	3.69e-19	PREDICTED: Helianthus annuus serine carboxypeptidase-like 13 (LOC110881347), mRNA	K16296	SCPL-I	serine carboxypeptidase-like clade I	http://www.genome.jp/dbget-bin/www_bget?ko:K16296	Q9CAU2	174	6.9e-12	Serine carboxypeptidase-like 5 OS=Arabidopsis thaliana OX=3702 GN=SCPL5 PE=2 SV=2	--	--	--	--	--	--	--	--	--	--
Cluster-29767.43990	--	--	--	--	--	--	--	--	--	--	--	--	--	--	--	--	--	--	--	--	--	--	--	--	--	--	--	--
Cluster-29767.5686	1228831525	XP_021973772.1	1165	1e-124	probable receptor-like protein kinase At5g59700 [Helianthus annuus]	XM_022116177.1	XM_022116177	156	4.55e-74	PREDICTED: Helianthus annuus putative receptor-like protein kinase At5g39000 (LOC110867030), mRNA	--	--	--	--	Q9FID8	563	2.4e-56	Putative receptor-like protein kinase At5g39000 OS=Arabidopsis thaliana OX=3702 GN=At5g39000 PE=3 SV=1	PF00069//PF07714	Protein kinase domain//Protein tyrosine and serine/threonine kinase	GO:0006468	protein phosphorylation	GO:0005524//GO:0004672	ATP binding//protein kinase activity	--	--	--	--
Cluster-29767.43992	1173843605	XP_020539228.1	149	3e-07	phospholipase A(1) LCAT3-like [Jatropha curcas]	XM_023916526.1	XM_023916526	72	1.02e-27	PREDICTED: Lactuca sativa phospholipase A(1) LCAT3-like (LOC111920958), transcript variant X2, mRNA	--	--	--	--	Q93V61	131	1.4e-06	Phospholipase A(1) LCAT3 OS=Arabidopsis thaliana OX=3702 GN=LCAT3 PE=1 SV=1	--	--	--	--	--	--	--	--	--	--
Cluster-29767.5684	--	--	--	--	--	--	--	--	--	--	--	--	--	--	--	--	--	--	--	--	--	--	--	--	--	--	--	--
Cluster-29767.5689	--	--	--	--	--	XM_022182886.1	XM_022182886	53	1.47e-17	PREDICTED: Helianthus annuus pyruvate dehydrogenase (acetyl-transferring) kinase, mitochondrial-like (LOC110941261), mRNA	--	--	--	--	--	--	--	--	--	--	--	--	--	--	--	--	--	--
Cluster-29767.5688	1389787796	XP_024993005.1	1635	3.3e-179	receptor-like serine/threonine-protein kinase SD1-8 [Cynara cardunculus var. scolymus]	XM_022181313.1	XM_022181313	398	0	PREDICTED: Helianthus annuus receptor-like serine/threonine-protein kinase SD1-8 (LOC110939742), mRNA	--	--	--	--	Q9S972	1256	1.1e-136	Receptor-like serine/threonine-protein kinase SD1-6 OS=Arabidopsis thaliana OX=3702 GN=SD16 PE=1 SV=2	PF11883//PF00069//PF07714	Domain of unknown function (DUF3403)//Protein kinase domain//Protein tyrosine and serine/threonine kinase	GO:0016310//GO:0009069//GO:0006468	phosphorylation//serine family amino acid metabolic process//protein phosphorylation	GO:0004674//GO:0004672//GO:0005524	protein serine/threonine kinase activity//protein kinase activity//ATP binding	--	--	--	--
Cluster-29767.43998	--	--	--	--	--	--	--	--	--	--	--	--	--	--	--	--	--	--	--	--	--	--	--	--	--	--	--	--
Cluster-29767.43999	--	--	--	--	--	--	--	--	--	--	--	--	--	--	--	--	--	--	--	--	--	--	--	--	--	--	--	--
Cluster-29767.57542	--	--	--	--	--	--	--	--	--	--	--	--	--	--	--	--	--	--	--	--	--	--	--	--	--	--	--	--
Cluster-29767.57543	--	--	--	--	--	--	--	--	--	--	--	--	--	--	--	--	--	--	PF15826	Bcl-2-binding component 3, p53 upregulated modulator of apoptosis	GO:0043065//GO:0097193//GO:0090200	positive regulation of apoptotic process//intrinsic apoptotic signaling pathway//positive regulation of release of cytochrome c from mitochondria	--	--	GO:0005739	mitochondrion	--	--
Cluster-29767.57540	--	--	--	--	--	--	--	--	--	--	--	--	--	--	--	--	--	--	--	--	--	--	--	--	--	--	--	--
Cluster-29767.57541	--	--	--	--	--	--	--	--	--	--	--	--	--	--	--	--	--	--	--	--	--	--	--	--	--	--	--	--
Cluster-11626.0	1387784837	PWA54870.1	475	3.2e-45	hypothetical protein CTI12_AA431350 [Artemisia annua]	--	--	--	--	--	--	--	--	--	Q9ZT94	137	1.9e-07	Retrovirus-related Pol polyprotein from transposon RE2 OS=Arabidopsis thaliana OX=3702 GN=RE2 PE=4 SV=1	--	--	--	--	--	--	--	--	--	--
Cluster-29767.57547	--	--	--	--	--	--	--	--	--	--	--	--	--	--	--	--	--	--	--	--	--	--	--	--	--	--	--	--
Cluster-29767.57544	1387798826	PWA66028.1	1126	1.9e-120	response regulator 12 [Artemisia annua]	XM_025124450.1	XM_025124450	405	0	PREDICTED: Cynara cardunculus var. scolymus two-component response regulator ARR12-like (LOC112517120), mRNA	K14491	ARR-B	two-component response regulator ARR-B family	http://www.genome.jp/dbget-bin/www_bget?ko:K14491	B8B3I4	819	2.9e-86	Two-component response regulator ORR22 OS=Oryza sativa subsp. indica OX=39946 GN=RR22 PE=3 SV=1	PF00072	Response regulator receiver domain	GO:0000160	phosphorelay signal transduction system	--	--	--	--	--	--
Cluster-29767.51978	--	--	--	--	--	--	--	--	--	--	--	--	--	--	--	--	--	--	--	--	--	--	--	--	--	--	--	--
Cluster-29767.57548	--	--	--	--	--	--	--	--	--	--	--	--	--	--	--	--	--	--	--	--	--	--	--	--	--	--	--	--
Cluster-29767.57549	1387816986	PWA81643.1	357	1.7e-31	ARM repeat superfamily protein [Artemisia annua]	--	--	--	--	--	--	--	--	--	Q9C7R6	149	8.3e-09	U-box domain-containing protein 17 OS=Arabidopsis thaliana OX=3702 GN=PUB17 PE=2 SV=1	PF00514	Armadillo/beta-catenin-like repeat	--	--	GO:0005515	protein binding	--	--	--	--
Cluster-29767.48104	976911188	KVH97845.1	168	3.4e-09	hypothetical protein Ccrd_000060, partial [Cynara cardunculus var. scolymus]	XM_025133096.1	XM_025133096	70	2.44e-26	PREDICTED: Cynara cardunculus var. scolymus ATP-dependent DNA helicase Q-like 5 (LOC112523478), mRNA	K10730	RECQL4	ATP-dependent DNA helicase Q4	http://www.genome.jp/dbget-bin/www_bget?ko:K10730	Q0WVW7	134	1.1e-06	ATP-dependent DNA helicase Q-like 5 OS=Arabidopsis thaliana OX=3702 GN=RECQL5 PE=2 SV=2	PF07043	Protein of unknown function (DUF1328)	--	--	--	--	GO:0005886	plasma membrane	--	--
Cluster-9382.0	--	--	--	--	--	--	--	--	--	--	--	--	--	--	--	--	--	--	--	--	--	--	--	--	--	--	--	--
Cluster-29767.102841	--	--	--	--	--	--	--	--	--	--	--	--	--	--	--	--	--	--	--	--	--	--	--	--	--	--	--	--
Cluster-29767.102840	--	--	--	--	--	XM_023915743.1	XM_023915743	47	6.24e-14	PREDICTED: Lactuca sativa mitochondrial pyruvate carrier 1 (LOC111920150), mRNA	--	--	--	--	--	--	--	--	--	--	--	--	--	--	--	--	--	--
Cluster-22789.0	--	--	--	--	--	--	--	--	--	--	--	--	--	--	--	--	--	--	--	--	--	--	--	--	--	--	--	--
Cluster-29767.102842	1387833451	PWA96706.1	304	5.1e-25	nucleic acid-binding, OB-fold protein [Artemisia annua]	--	--	--	--	--	--	--	--	--	--	--	--	--	--	--	--	--	--	--	--	--	--	--
Cluster-29767.102845	1228849971	XP_021981910.1	219	5.3e-15	carbon catabolite repressor protein 4 homolog 5 [Helianthus annuus]	--	--	--	--	--	--	--	--	--	Q8VYU4	170	9.6e-11	Carbon catabolite repressor protein 4 homolog 6 OS=Arabidopsis thaliana OX=3702 GN=CCR4-6 PE=2 SV=2	--	--	--	--	--	--	--	--	--	--
Cluster-29767.102844	--	--	--	--	--	--	--	--	--	--	--	--	--	--	--	--	--	--	--	--	--	--	--	--	--	--	--	--
Cluster-29767.102847	--	--	--	--	--	FQ014226.1	FQ014226	139	4.98e-65	Beta vulgaris subsp. maritima genotype male-sterile E mitochondrion, partial genome	--	--	--	--	--	--	--	--	--	--	--	--	--	--	--	--	--	--
Cluster-29767.102846	--	--	--	--	--	--	--	--	--	--	--	--	--	--	--	--	--	--	--	--	--	--	--	--	--	--	--	--
Cluster-29767.102849	--	--	--	--	--	--	--	--	--	--	--	--	--	--	--	--	--	--	--	--	--	--	--	--	--	--	--	--
Cluster-29767.102848	1387785163	PWA55115.1	632	2.8e-63	hypothetical protein CTI12_AA430010 [Artemisia annua]	--	--	--	--	--	--	--	--	--	--	--	--	--	PF01239	Protein prenyltransferase alpha subunit repeat	GO:0018342	protein prenylation	GO:0008318	protein prenyltransferase activity	--	--	--	--
Cluster-15323.0	--	--	--	--	--	--	--	--	--	--	--	--	--	--	--	--	--	--	--	--	--	--	--	--	--	--	--	--
Cluster-14865.0	--	--	--	--	--	XM_025112273.1	XM_025112273	39	8.26e-10	PREDICTED: Cynara cardunculus var. scolymus probable indole-3-pyruvate monooxygenase YUCCA5 (LOC112507625), mRNA	--	--	--	--	--	--	--	--	--	--	--	--	--	--	--	--	--	--
Cluster-9915.0	--	--	--	--	--	--	--	--	--	--	--	--	--	--	--	--	--	--	--	--	--	--	--	--	--	--	--	--
Cluster-28660.0	--	--	--	--	--	--	--	--	--	--	--	--	--	--	--	--	--	--	--	--	--	--	--	--	--	--	--	--
Cluster-29767.17583	--	--	--	--	--	--	--	--	--	--	--	--	--	--	--	--	--	--	--	--	--	--	--	--	--	--	--	--
Cluster-29767.21978	1387799855	PWA66889.1	263	4.2e-20	DNA polymerase alpha catalytic subunit [Artemisia annua]	XM_023873303.1	XM_023873303	114	1.08e-50	PREDICTED: Lactuca sativa DNA polymerase alpha catalytic subunit (LOC111876728), mRNA	K02320	POLA1	DNA polymerase alpha subunit A	http://www.genome.jp/dbget-bin/www_bget?ko:K02320	Q9FHA3	226	3.1e-17	DNA polymerase alpha catalytic subunit OS=Arabidopsis thaliana OX=3702 GN=POLA PE=3 SV=2	PF02773	S-adenosylmethionine synthetase, C-terminal domain	GO:0006556//GO:0006555	S-adenosylmethionine biosynthetic process//methionine metabolic process	GO:0004478	methionine adenosyltransferase activity	--	--	--	--
Cluster-29767.77970	1389774365	XP_024988641.1	1638	3.8e-179	nuclear intron maturase 3, mitochondrial [Cynara cardunculus var. scolymus]	XM_025132873.1	XM_025132873	607	0	PREDICTED: Cynara cardunculus var. scolymus nuclear intron maturase 3, mitochondrial (LOC112523320), mRNA	--	--	--	--	Q9LZA5	990	2e-105	Nuclear intron maturase 3, mitochondrial OS=Arabidopsis thaliana OX=3702 GN=NMAT3 PE=3 SV=2	PF04831//PF01348	Popeye protein conserved region//Type II intron maturase	GO:0006397	mRNA processing	--	--	GO:0016020	membrane	--	--
Cluster-31410.0	--	--	--	--	--	--	--	--	--	--	--	--	--	--	--	--	--	--	PF08710	Coronavirus replicase NSP9	GO:0019079	viral genome replication	GO:0003723	RNA binding	--	--	--	--
Cluster-29767.21979	--	--	--	--	--	--	--	--	--	--	--	--	--	--	--	--	--	--	--	--	--	--	--	--	--	--	--	--
Cluster-4766.0	--	--	--	--	--	--	--	--	--	--	--	--	--	--	--	--	--	--	--	--	--	--	--	--	--	--	--	--
Cluster-23680.0	--	--	--	--	--	--	--	--	--	--	--	--	--	--	--	--	--	--	--	--	--	--	--	--	--	--	--	--
Cluster-29767.103712	--	--	--	--	--	--	--	--	--	--	--	--	--	--	--	--	--	--	PF01660	Viral methyltransferase	GO:0009451//GO:0080009//GO:0006396	RNA modification//mRNA methylation//RNA processing	GO:0008174//GO:0003723	mRNA methyltransferase activity//RNA binding	--	--	--	--
Cluster-29767.103713	1387830681	PWA94107.1	193	1.5e-12	CARP motif-containing protein [Artemisia annua]	XM_022116684.1	XM_022116684	74	5.01e-29	PREDICTED: Helianthus annuus TBCC domain-containing protein 1-like (LOC110867674), mRNA	K16810	TBCCD1	TBCC domain-containing protein 1	http://www.genome.jp/dbget-bin/www_bget?ko:K16810	--	--	--	--	--	--	--	--	--	--	--	--	--	--
Cluster-29767.103710	--	--	--	--	--	--	--	--	--	--	--	--	--	--	--	--	--	--	--	--	--	--	--	--	--	--	--	--
Cluster-29767.103711	1322363059	PLY68581.1	672	2e-67	hypothetical protein LSAT_2X9961 [Lactuca sativa]	FJ481136.1	FJ481136	69	1.42e-25	Achillea millefolium clone AmK206 microsatellite sequence	--	--	--	--	--	--	--	--	PF12937//PF00646	F-box-like//F-box domain	--	--	GO:0005515	protein binding	--	--	--	--
Cluster-29767.103716	--	--	--	--	--	--	--	--	--	--	--	--	--	--	--	--	--	--	--	--	--	--	--	--	--	--	--	--
Cluster-29767.103717	--	--	--	--	--	KP332201.1	KP332201	108	5.57e-48	Chrysanthemum x morifolium microsatellite JH-360 sequence	--	--	--	--	--	--	--	--	--	--	--	--	--	--	--	--	--	--
Cluster-29767.103714	--	--	--	--	--	--	--	--	--	--	--	--	--	--	--	--	--	--	PF07552	Spore Coat Protein X and V domain	GO:0030435	sporulation resulting in formation of a cellular spore	--	--	GO:0031160	spore wall	--	--
Cluster-29767.103715	1387808135	PWA73886.1	156	2e-08	hypothetical protein CTI12_AA257370 [Artemisia annua]	XM_025119603.1	XM_025119603	46	1.19e-13	PREDICTED: Cynara cardunculus var. scolymus caltractin-like (LOC112513367), mRNA	K13448	CML	calcium-binding protein CML	http://www.genome.jp/dbget-bin/www_bget?ko:K13448	O82659	129	1e-06	Probable calcium-binding protein CML20 OS=Arabidopsis thaliana OX=3702 GN=CML20 PE=1 SV=1	PF13405//PF13499//PF00036//PF13202	EF-hand domain//EF-hand domain pair//EF hand//EF hand	--	--	GO:0005509	calcium ion binding	--	--	--	--
Cluster-29767.17580	1191683610	OTG35572.1	522	2.1e-50	putative F-box domain-containing protein [Helianthus annuus]	JF940498.1	JF940498	50	2.15e-15	Chrysanthemum oreastrum clone a chrysanthemyl diphosphate synthase (CDS) gene, exons 5 through 10 and partial cds &amp;&amp; JF940499.1 Chrysanthemum oreastrum clone b chrysanthemyl diphosphate synthase (CDS) gene, exons 5 through 10 and partial cds &amp;&amp; JF940500.1 Chrysanthemum oreastrum clone c chrysanthemyl diphosphate synthase (CDS) gene, exons 5 through 10 and partial cds &amp;&amp; JF…	--	--	--	--	Q8GXC7	234	2e-18	F-box/kelch-repeat protein At3g06240 OS=Arabidopsis thaliana OX=3702 GN=At3g06240 PE=2 SV=1	PF12937//PF00646	F-box-like//F-box domain	--	--	GO:0005515	protein binding	--	--	--	--
Cluster-29767.103718	1387833295	PWA96558.1	186	6.1e-12	Ribosomal protein L29 [Artemisia annua]	XM_025134609.1	XM_025134609	97	4.8e-42	PREDICTED: Cynara cardunculus var. scolymus 60S ribosomal protein L35-2-like (LOC112524676), mRNA	K02918	RP-L35e, RPL35	large subunit ribosomal protein L35e	http://www.genome.jp/dbget-bin/www_bget?ko:K02918	Q9M5L0	159	3.1e-10	60S ribosomal protein L35 OS=Euphorbia esula OX=3993 GN=RPL35 PE=2 SV=1	--	--	--	--	--	--	--	--	KOG3436	60S ribosomal protein L35
Cluster-29767.103719	1191640991	OTF92993.1	268	2.7e-21	putative F-box domain, FBD domain, Leucine-rich repeat domain, L domain-like protein [Helianthus annuus]	--	--	--	--	--	--	--	--	--	Q9FZ70	164	1.2e-10	F-box/FBD/LRR-repeat protein At1g13570 OS=Arabidopsis thaliana OX=3702 GN=At1g13570 PE=2 SV=1	PF00646//PF12937	F-box domain//F-box-like	--	--	GO:0005515	protein binding	--	--	--	--
Cluster-31621.0	--	--	--	--	--	--	--	--	--	--	--	--	--	--	--	--	--	--	--	--	--	--	--	--	--	--	--	--
Cluster-18865.0	--	--	--	--	--	--	--	--	--	--	--	--	--	--	--	--	--	--	--	--	--	--	--	--	--	--	--	--
Cluster-29767.7263	1387810576	PWA75993.1	377	5.9e-34	C1-like protein [Artemisia annua]	--	--	--	--	--	--	--	--	--	--	--	--	--	PF00130	Phorbol esters/diacylglycerol binding domain (C1 domain)	GO:0035556	intracellular signal transduction	--	--	--	--	--	--
Cluster-29767.7262	--	--	--	--	--	XM_022150238.1	XM_022150238	43	1.23e-11	PREDICTED: Helianthus annuus replication factor C subunit 3-like (LOC110904380), mRNA	--	--	--	--	--	--	--	--	--	--	--	--	--	--	--	--	--	--
Cluster-29767.7261	1228861851	XP_021987096.1	294	2.9e-24	probable beta-1,4-xylosyltransferase IRX9H [Helianthus annuus]	--	--	--	--	--	K20869	IRX9	putative beta-1,4-xylosyltransferase IRX9	http://www.genome.jp/dbget-bin/www_bget?ko:K20869	Q9SXC4	231	2.2e-18	Probable beta-1,4-xylosyltransferase IRX9H OS=Arabidopsis thaliana OX=3702 GN=IRX9H PE=2 SV=2	PF03360//PF07297	Glycosyltransferase family 43//Dolichol phosphate-mannose biosynthesis regulatory protein (DPM2)	GO:0019348//GO:0030206	dolichol metabolic process//chondroitin sulfate biosynthetic process	GO:0030234//GO:0015018	enzyme regulator activity//galactosylgalactosylxylosylprotein 3-beta-glucuronosyltransferase activity	GO:0016020//GO:0030176	membrane//integral component of endoplasmic reticulum membrane	--	--
Cluster-29767.7260	--	--	--	--	--	XM_025125834.1	XM_025125834	49	3.26e-15	PREDICTED: Cynara cardunculus var. scolymus ubiquitin carboxyl-terminal hydrolase 5-like (LOC112518216), transcript variant X4, mRNA	--	--	--	--	--	--	--	--	--	--	--	--	--	--	--	--	--	--
Cluster-29767.7267	1387796864	PWA64388.1	167	1e-09	ARM repeat superfamily protein [Artemisia annua]	--	--	--	--	--	--	--	--	--	--	--	--	--	--	--	--	--	--	--	--	--	--	--
Cluster-29767.7266	--	--	--	--	--	--	--	--	--	--	--	--	--	--	--	--	--	--	--	--	--	--	--	--	--	--	--	--
Cluster-29767.7265	--	--	--	--	--	--	--	--	--	--	--	--	--	--	--	--	--	--	PF08397//PF02402	IRSp53/MIM homology domain//Lysis protein	GO:0019835//GO:0007009//GO:0009405	cytolysis//plasma membrane organization//pathogenesis	--	--	GO:0019867	outer membrane	--	--
Cluster-29767.7264	--	--	--	--	--	--	--	--	--	--	--	--	--	--	--	--	--	--	--	--	--	--	--	--	--	--	--	--
Cluster-29767.7269	--	--	--	--	--	--	--	--	--	--	--	--	--	--	--	--	--	--	--	--	--	--	--	--	--	--	--	--
Cluster-29767.7268	--	--	--	--	--	XM_022141542.1	XM_022141542	61	9.07e-22	PREDICTED: Helianthus annuus leucine-rich repeat protein 1-like (LOC110894331), transcript variant X1, mRNA	--	--	--	--	--	--	--	--	--	--	--	--	--	--	--	--	--	--
Cluster-29767.46812	--	--	--	--	--	--	--	--	--	--	--	--	--	--	--	--	--	--	--	--	--	--	--	--	--	--	--	--
Cluster-29767.46813	--	--	--	--	--	--	--	--	--	--	--	--	--	--	--	--	--	--	--	--	--	--	--	--	--	--	--	--
Cluster-6072.0	--	--	--	--	--	--	--	--	--	--	--	--	--	--	--	--	--	--	--	--	--	--	--	--	--	--	--	--
Cluster-29767.46811	--	--	--	--	--	--	--	--	--	--	--	--	--	--	--	--	--	--	PF16011//PF03784	Carbohydrate-binding family 9//Cyclotide family	GO:0005975//GO:0006952//GO:0016052	carbohydrate metabolic process//defense response//carbohydrate catabolic process	GO:0030246//GO:0004553	carbohydrate binding//hydrolase activity, hydrolyzing O-glycosyl compounds	--	--	--	--
Cluster-29767.46816	--	--	--	--	--	--	--	--	--	--	--	--	--	--	--	--	--	--	--	--	--	--	--	--	--	--	--	--
Cluster-29767.73314	1387781444	PWA52353.1	516	1.9e-49	Leucine-rich repeat-containing protein [Artemisia annua]	XM_022143020.1	XM_022143020	171	2.15e-82	PREDICTED: Helianthus annuus probable leucine-rich repeat receptor-like protein kinase At1g35710 (LOC110895696), mRNA	--	--	--	--	--	--	--	--	--	--	--	--	--	--	--	--	--	--
Cluster-29767.46814	--	--	--	--	--	XM_022120766.1	XM_022120766	41	3.35e-10	PREDICTED: Helianthus annuus ATP synthase subunit beta, mitochondrial-like (LOC110872003), mRNA	--	--	--	--	--	--	--	--	--	--	--	--	--	--	--	--	--	--
Cluster-29767.46815	1387795002	PWA62862.1	1101	1.8e-117	hypothetical protein CTI12_AA359900 [Artemisia annua]	XM_025136589.1	XM_025136589	160	1.83e-76	PREDICTED: Cynara cardunculus var. scolymus FRIGIDA-like protein 4b (LOC112526329), mRNA	--	--	--	--	Q940H8	254	1.1e-20	FRIGIDA-like protein 4b OS=Arabidopsis thaliana OX=3702 GN=FRL4B PE=1 SV=1	--	--	--	--	--	--	--	--	--	--
Cluster-29767.733	1340510635	XP_023736121.1	871	7.7e-91	LOB domain-containing protein 15 [Lactuca sativa]	XM_023880353.1	XM_023880353	416	0	PREDICTED: Lactuca sativa LOB domain-containing protein 15 (LOC111884023), mRNA	--	--	--	--	Q8L5T5	623	1.7e-63	LOB domain-containing protein 15 OS=Arabidopsis thaliana OX=3702 GN=LBD15 PE=1 SV=2	--	--	--	--	--	--	--	--	--	--
Cluster-29767.732	1305224794	PKI40606.1	181	4.3e-11	hypothetical protein CRG98_039016 [Punica granatum]	--	--	--	--	--	--	--	--	--	Q8L5T5	172	1.8e-11	LOB domain-containing protein 15 OS=Arabidopsis thaliana OX=3702 GN=LBD15 PE=1 SV=2	--	--	--	--	--	--	--	--	--	--
Cluster-29767.731	1322424569	PLY98783.1	281	9.8e-23	hypothetical protein LSAT_7X18821 [Lactuca sativa]	XM_023903160.1	XM_023903160	93	1.4e-39	PREDICTED: Lactuca sativa receptor-like serine/threonine-protein kinase SD1-8 (LOC111907384), mRNA	--	--	--	--	P22553	193	5.9e-14	S-locus-specific glycoprotein BS29-2 OS=Brassica oleracea var. alboglabra OX=3714 GN=SLSG PE=2 SV=1	--	--	--	--	--	--	--	--	--	--
Cluster-29767.46819	1387824908	PWA88779.1	1405	2e-152	ethanolamine-phosphate cytidylyltransferase [Artemisia annua]	XM_025124880.1	XM_025124880	477	0	PREDICTED: Cynara cardunculus var. scolymus ethanolamine-phosphate cytidylyltransferase-like (LOC112517446), mRNA	K00967	PCYT2	ethanolamine-phosphate cytidylyltransferase	http://www.genome.jp/dbget-bin/www_bget?ko:K00967	Q9ZVI9	991	7.6e-106	Ethanolamine-phosphate cytidylyltransferase OS=Arabidopsis thaliana OX=3702 GN=PECT1 PE=1 SV=1	PF06574//PF01467//PF02333	FAD synthetase//Cytidylyltransferase-like//Phytase	GO:0009058//GO:0009231//GO:0006771	biosynthetic process//riboflavin biosynthetic process//riboflavin metabolic process	GO:0003824//GO:0003919//GO:0016158	catalytic activity//FMN adenylyltransferase activity//3-phytase activity	--	--	KOG2803	Choline phosphate cytidylyltransferase/Predicted CDP-ethanolamine synthase
Cluster-29767.737	--	--	--	--	--	KP332412.1	KP332412	66	1.07e-24	Chrysanthemum x morifolium microsatellite JH-572 sequence	--	--	--	--	--	--	--	--	--	--	--	--	--	--	--	--	--	--
Cluster-29767.22096	--	--	--	--	--	--	--	--	--	--	--	--	--	--	--	--	--	--	--	--	--	--	--	--	--	--	--	--
Cluster-29767.735	--	--	--	--	--	--	--	--	--	--	--	--	--	--	--	--	--	--	--	--	--	--	--	--	--	--	--	--
Cluster-29767.734	--	--	--	--	--	--	--	--	--	--	--	--	--	--	--	--	--	--	--	--	--	--	--	--	--	--	--	--
Cluster-29767.76919	1387832914	PWA96196.1	1164	1.9e-124	phytochelatin synthase [Artemisia annua]	XM_023887593.1	XM_023887593	279	2.86e-142	PREDICTED: Lactuca sativa glutathione gamma-glutamylcysteinyltransferase 1-like (LOC111891546), transcript variant X1, mRNA	K05941	E2.3.2.15	glutathione gamma-glutamylcysteinyltransferase	http://www.genome.jp/dbget-bin/www_bget?ko:K05941	Q9S7Z3	679	1.3e-69	Glutathione gamma-glutamylcysteinyltransferase 1 OS=Arabidopsis thaliana OX=3702 GN=PCS1 PE=1 SV=1	PF05023//PF09328//PF03412	Phytochelatin synthase//Domain of unknown function (DUF1984)//Peptidase C39 family	GO:0006508//GO:0046938//GO:0010038	proteolysis//phytochelatin biosynthetic process//response to metal ion	GO:0016756//GO:0005524//GO:0046872//GO:0008233	glutathione gamma-glutamylcysteinyltransferase activity//ATP binding//metal ion binding//peptidase activity	GO:0016021	integral component of membrane	KOG0632	Phytochelatin synthase
Cluster-20657.0	--	--	--	--	--	--	--	--	--	--	--	--	--	--	--	--	--	--	--	--	--	--	--	--	--	--	--	--
Cluster-29767.83662	1340460880	XP_023757670.1	996	3.4e-105	probable leucine-rich repeat receptor-like protein kinase At1g35710 [Lactuca sativa]	XM_023901903.1	XM_023901903	222	8.02e-111	PREDICTED: Lactuca sativa probable leucine-rich repeat receptor-like protein kinase At1g35710 (LOC111906173), mRNA	--	--	--	--	Q9LP24	817	7.4e-86	Probable leucine-rich repeat receptor-like protein kinase At1g35710 OS=Arabidopsis thaliana OX=3702 GN=At1g35710 PE=1 SV=1	PF13855//PF00560//PF01776	Leucine rich repeat//Leucine Rich Repeat//Ribosomal L22e protein family	GO:0006412//GO:0042254	translation//ribosome biogenesis	GO:0005515//GO:0003735	protein binding//structural constituent of ribosome	GO:0005840	ribosome	--	--
Cluster-29767.83663	1322385509	PLY79400.1	728	2.4e-74	hypothetical protein LSAT_3X58681 [Lactuca sativa]	XM_023915910.1	XM_023915910	181	2.85e-88	PREDICTED: Lactuca sativa probable leucine-rich repeat receptor-like protein kinase At1g35710 (LOC111920334), mRNA	--	--	--	--	Q9LP24	466	2.2e-45	Probable leucine-rich repeat receptor-like protein kinase At1g35710 OS=Arabidopsis thaliana OX=3702 GN=At1g35710 PE=1 SV=1	--	--	--	--	--	--	--	--	--	--
Cluster-29767.43332	--	--	--	--	--	--	--	--	--	--	--	--	--	--	--	--	--	--	--	--	--	--	--	--	--	--	--	--
Cluster-29767.43333	1228941972	XP_022020385.1	648	1.5e-64	F-box/FBD/LRR-repeat protein At1g13570-like isoform X4 [Helianthus annuus]	XM_022164452.1	XM_022164452	115	4.62e-51	PREDICTED: Helianthus annuus F-box/FBD/LRR-repeat protein At1g13570-like (LOC110920227), mRNA	--	--	--	--	Q9FZ70	255	2.1e-20	F-box/FBD/LRR-repeat protein At1g13570 OS=Arabidopsis thaliana OX=3702 GN=At1g13570 PE=2 SV=1	PF00646	F-box domain	--	--	GO:0005515	protein binding	--	--	--	--
Cluster-29767.83666	1387827027	PWA90724.1	425	1.4e-39	leucine-rich repeat receptor-like protein kinase family protein [Artemisia annua]	--	--	--	--	--	--	--	--	--	Q9LP24	318	1.3e-28	Probable leucine-rich repeat receptor-like protein kinase At1g35710 OS=Arabidopsis thaliana OX=3702 GN=At1g35710 PE=1 SV=1	PF13516//PF13855//PF00560	Leucine Rich repeat//Leucine rich repeat//Leucine Rich Repeat	--	--	GO:0005515	protein binding	--	--	--	--
Cluster-29767.43335	1387816927	PWA81589.1	211	1.1e-14	squalene synthase [Artemisia annua]	--	--	--	--	--	--	--	--	--	--	--	--	--	PF14372	Domain of unknown function (DUF4413)	--	--	GO:0003677	DNA binding	--	--	--	--
Cluster-29767.83664	1340460878	XP_023757669.1	565	1.7e-55	probable leucine-rich repeat receptor-like protein kinase At1g35710 [Lactuca sativa]	XM_022168314.1	XM_022168314	130	5.79e-60	PREDICTED: Helianthus annuus probable leucine-rich repeat receptor-like protein kinase At1g35710 (LOC110924290), mRNA	--	--	--	--	Q9LP24	439	2.7e-42	Probable leucine-rich repeat receptor-like protein kinase At1g35710 OS=Arabidopsis thaliana OX=3702 GN=At1g35710 PE=1 SV=1	PF13516//PF13855//PF00560	Leucine Rich repeat//Leucine rich repeat//Leucine Rich Repeat	--	--	GO:0005515	protein binding	--	--	--	--
Cluster-29767.43337	1585737337	XP_028064643.1	140	2e-06	protein FORGETTER 1-like isoform X2 [Camellia sinensis]	XM_022172961.1	XM_022172961	67	3.57e-25	PREDICTED: Helianthus annuus protein FORGETTER 1 (LOC110929783), transcript variant X4, mRNA	--	--	--	--	F4IF36	127	2.4e-06	Protein FORGETTER 1 OS=Arabidopsis thaliana OX=3702 GN=FGT1 PE=1 SV=1	--	--	--	--	--	--	--	--	--	--
Cluster-29767.43338	1387758094	PWA37667.1	227	1.1e-16	RING/FYVE/PHD zinc finger superfamily protein [Artemisia annua]	XM_023877972.1	XM_023877972	97	4.77e-42	PREDICTED: Lactuca sativa protein FORGETTER 1 (LOC111881558), transcript variant X3, mRNA	--	--	--	--	F4IF36	155	9e-10	Protein FORGETTER 1 OS=Arabidopsis thaliana OX=3702 GN=FGT1 PE=1 SV=1	--	--	--	--	--	--	--	--	--	--
Cluster-29767.43339	1387770071	PWA44440.1	1218	5.5e-131	ATP-dependent metalloprotease FtsH [Artemisia annua]	AB542716.1	AB542716	896	0	Chrysanthemum x morifolium FTSH mRNA for ATP-dependent metalloprotease FtsH, complete cds	K03798	ftsH, hflB	cell division protease FtsH	http://www.genome.jp/dbget-bin/www_bget?ko:K03798	Q39102	1167	1.7e-126	ATP-dependent zinc metalloprotease FTSH 1, chloroplastic OS=Arabidopsis thaliana OX=3702 GN=FTSH1 PE=1 SV=2	PF01434	Peptidase family M41	GO:0006508	proteolysis	GO:0004222//GO:0005524	metalloendopeptidase activity//ATP binding	--	--	KOG0731	AAA+-type ATPase containing the peptidase M41 domain
Cluster-29767.83668	--	--	--	--	--	--	--	--	--	--	--	--	--	--	--	--	--	--	--	--	--	--	--	--	--	--	--	--
Cluster-8471.0	--	--	--	--	--	KP333107.1	KP333107	39	1.11e-09	Chrysanthemum x morifolium microsatellite JH-1271 sequence	--	--	--	--	--	--	--	--	--	--	--	--	--	--	--	--	--	--
Cluster-29767.16237	1387825260	PWA89101.1	525	1.5e-50	hypothetical protein CTI12_AA113300 [Artemisia annua]	XR_003069106.1	XR_003069106	142	2.48e-66	PREDICTED: Cynara cardunculus var. scolymus uncharacterized LOC112511594 (LOC112511594), transcript variant X2, ncRNA	--	--	--	--	--	--	--	--	PF01529	DHHC palmitoyltransferase	GO:0042967	obsolete acyl-carrier-protein biosynthetic process	GO:0016409	palmitoyltransferase activity	--	--	--	--
Cluster-29767.16236	--	--	--	--	--	--	--	--	--	--	--	--	--	--	--	--	--	--	--	--	--	--	--	--	--	--	--	--
Cluster-29767.16235	--	--	--	--	--	--	--	--	--	--	--	--	--	--	--	--	--	--	--	--	--	--	--	--	--	--	--	--
Cluster-29767.16234	1387790135	PWA58976.1	251	3.2e-19	hypothetical protein CTI12_AA395570 [Artemisia annua]	--	--	--	--	--	K13463	COI-1	coronatine-insensitive protein 1	http://www.genome.jp/dbget-bin/www_bget?ko:K13463	A2XEV1	137	2e-07	Coronatine-insensitive protein homolog 2 OS=Oryza sativa subsp. indica OX=39946 GN=COI2 PE=3 SV=1	--	--	--	--	--	--	--	--	--	--
Cluster-29767.16233	1387754537	PWA36211.1	368	1.5e-32	ribosomal protein L25/Gln-tRNA synthetase, anti-codon-binding domain-containing protein [Artemisia annua]	--	--	--	--	--	K02897	RP-L25, rplY	large subunit ribosomal protein L25	http://www.genome.jp/dbget-bin/www_bget?ko:K02897	--	--	--	--	PF01386	Ribosomal L25p family	GO:0042254//GO:0006412	ribosome biogenesis//translation	GO:0003735//GO:0008097	structural constituent of ribosome//5S rRNA binding	GO:0005840	ribosome	--	--
Cluster-29767.16232	--	--	--	--	--	--	--	--	--	--	--	--	--	--	--	--	--	--	--	--	--	--	--	--	--	--	--	--
Cluster-29767.16231	--	--	--	--	--	--	--	--	--	--	--	--	--	--	--	--	--	--	--	--	--	--	--	--	--	--	--	--
Cluster-29767.16230	--	--	--	--	--	--	--	--	--	--	--	--	--	--	--	--	--	--	--	--	--	--	--	--	--	--	--	--
Cluster-29767.110337	--	--	--	--	--	--	--	--	--	--	--	--	--	--	--	--	--	--	--	--	--	--	--	--	--	--	--	--
Cluster-29767.16239	--	--	--	--	--	--	--	--	--	--	--	--	--	--	--	--	--	--	--	--	--	--	--	--	--	--	--	--
Cluster-29767.16238	--	--	--	--	--	--	--	--	--	--	--	--	--	--	--	--	--	--	--	--	--	--	--	--	--	--	--	--
Cluster-29767.81282	1389797463	XP_024997068.1	175	1.8e-10	ribosomal RNA small subunit methyltransferase nep-1 [Cynara cardunculus var. scolymus]	XM_021426522.1	XM_021426522	36	6.47e-08	PREDICTED: Herrania umbratica ribosomal RNA small subunit methyltransferase NEP1 (LOC110415047), transcript variant X2, mRNA	--	--	--	--	--	--	--	--	--	--	--	--	--	--	--	--	--	--
Cluster-29767.4551	1387807678	PWA73499.1	1071	1.1e-113	ubiquitin-conjugating enzyme/RWD-like protein [Artemisia annua]	--	--	--	--	--	K10581	UBE2O	ubiquitin-conjugating enzyme E2 O	http://www.genome.jp/dbget-bin/www_bget?ko:K10581	Q9LUQ5	541	1.2e-53	Probable ubiquitin-conjugating enzyme E2 25 OS=Arabidopsis thaliana OX=3702 GN=UBC25 PE=2 SV=1	PF03526//PF08123//PF04889	Colicin E1 (microcin) immunity protein//Histone methylation protein DOT1//Cwf15/Cwc15 cell cycle control protein	GO:0006554//GO:0006955//GO:0000398//GO:0030153//GO:0006479	lysine catabolic process//immune response//mRNA splicing, via spliceosome//bacteriocin immunity//protein methylation	GO:0018024//GO:0015643	histone-lysine N-methyltransferase activity//toxic substance binding	GO:0005681//GO:0019814	spliceosomal complex//immunoglobulin complex	KOG0895	Ubiquitin-conjugating enzyme
Cluster-29767.4552	1191646517	OTF98490.1	153	6.1e-08	hypothetical protein HannXRQ_Chr14g0446241 [Helianthus annuus]	--	--	--	--	--	--	--	--	--	--	--	--	--	--	--	--	--	--	--	--	--	--	--
Cluster-29767.4553	--	--	--	--	--	--	--	--	--	--	--	--	--	--	--	--	--	--	--	--	--	--	--	--	--	--	--	--
Cluster-29767.81286	641841879	KDO60789.1	272	5.9e-21	hypothetical protein CISIN_1g0025861mg, partial [Citrus sinensis]	--	--	--	--	--	K11699	RDR, RDRP	RNA-dependent RNA polymerase	http://www.genome.jp/dbget-bin/www_bget?ko:K11699	Q0DXS3	196	1.5e-13	Probable RNA-dependent RNA polymerase 1 OS=Oryza sativa subsp. japonica OX=39947 GN=RDR1 PE=2 SV=2	PF09763//PF05183//PF15957	Exocyst complex component Sec3//RNA dependent RNA polymerase//Commissureless	GO:0006144//GO:0007411//GO:0006887	purine nucleobase metabolic process//axon guidance//exocytosis	GO:0003968	RNA-directed 5'-3' RNA polymerase activity	GO:0000145//GO:0031379	exocyst//RNA-directed RNA polymerase complex	--	--
Cluster-29767.4555	--	--	--	--	--	--	--	--	--	--	--	--	--	--	--	--	--	--	--	--	--	--	--	--	--	--	--	--
Cluster-29767.81284	--	--	--	--	--	--	--	--	--	--	--	--	--	--	--	--	--	--	--	--	--	--	--	--	--	--	--	--
Cluster-29767.4557	--	--	--	--	--	NC_039757.1	NC_039757	206	9.37e-102	Chrysanthemum boreale mitochondrion, complete genome	--	--	--	--	--	--	--	--	PF01080	Presenilin	GO:0016485	protein processing	GO:0004190	aspartic-type endopeptidase activity	GO:0016021	integral component of membrane	--	--
Cluster-29767.4558	--	--	--	--	--	--	--	--	--	--	--	--	--	--	--	--	--	--	--	--	--	--	--	--	--	--	--	--
Cluster-29767.21846	--	--	--	--	--	--	--	--	--	--	--	--	--	--	--	--	--	--	--	--	--	--	--	--	--	--	--	--
Cluster-29767.81288	1387831470	PWA94844.1	449	3e-42	2-oxoglutarate (2OG) and Fe(II)-dependent oxygenase superfamily protein (mitochondrion) [Artemisia annua]	--	--	--	--	--	--	--	--	--	P10967	233	1.2e-18	1-aminocyclopropane-1-carboxylate oxidase homolog OS=Solanum lycopersicum OX=4081 GN=ACO3 PE=2 SV=1	--	--	--	--	--	--	--	--	--	--
Cluster-29767.81289	--	--	--	--	--	--	--	--	--	--	--	--	--	--	--	--	--	--	--	--	--	--	--	--	--	--	--	--
Cluster-29767.46733	947079272	KRH28061.1	354	1.9e-30	hypothetical protein GLYMA_11G031800 [Glycine max]	XM_025129696.1	XM_025129696	166	2.18e-79	PREDICTED: Cynara cardunculus var. scolymus autophagy-related protein 8f-like (LOC112521062), transcript variant X2, mRNA	K08341	GABARAP, ATG8, LC3	GABA(A) receptor-associated protein	http://www.genome.jp/dbget-bin/www_bget?ko:K08341	Q8VYK7	333	2e-29	Autophagy-related protein 8f OS=Arabidopsis thaliana OX=3702 GN=ATG8F PE=1 SV=1	PF14587	O-Glycosyl hydrolase family 30	GO:0005975	carbohydrate metabolic process	GO:0004553	hydrolase activity, hydrolyzing O-glycosyl compounds	--	--	KOG1654	Microtubule-associated anchor protein involved in autophagy and membrane trafficking
Cluster-29767.197	--	--	--	--	--	--	--	--	--	--	--	--	--	--	--	--	--	--	--	--	--	--	--	--	--	--	--	--
Cluster-29767.196	--	--	--	--	--	--	--	--	--	--	--	--	--	--	--	--	--	--	--	--	--	--	--	--	--	--	--	--
Cluster-29767.195	1387796936	PWA64447.1	347	2.1e-30	zinc knuckle CX2CX4HX4C [Artemisia annua]	--	--	--	--	--	--	--	--	--	--	--	--	--	--	--	--	--	--	--	--	--	--	--
Cluster-29767.194	1387767516	PWA42796.1	348	1e-30	Leucine-rich repeat-containing protein [Artemisia annua]	XR_003067526.1	XR_003067526	95	6.36e-41	PREDICTED: Cynara cardunculus var. scolymus uncharacterized LOC112501571 (LOC112501571), transcript variant X4, misc_RNA	--	--	--	--	--	--	--	--	PF13855	Leucine rich repeat	--	--	GO:0005515	protein binding	--	--	--	--
Cluster-29767.193	1387832115	PWA95446.1	221	8.8e-16	monodehydroascorbate reductase [Artemisia annua]	--	--	--	--	--	--	--	--	--	--	--	--	--	PF04772	Influenza B matrix protein 2 (BM2)	GO:1902600	proton transmembrane transport	--	--	GO:0016021	integral component of membrane	--	--
Cluster-29767.192	--	--	--	--	--	--	--	--	--	--	--	--	--	--	--	--	--	--	--	--	--	--	--	--	--	--	--	--
Cluster-29767.191	1387819985	PWA84317.1	1020	5.6e-108	auxin efflux carrier family protein [Artemisia annua]	XM_023892633.1	XM_023892633	286	2.12e-146	PREDICTED: Lactuca sativa protein PIN-LIKES 7-like (LOC111896659), mRNA	K07088	K07088	uncharacterized protein	http://www.genome.jp/dbget-bin/www_bget?ko:K07088	Q9FKY4	662	7e-68	Protein PIN-LIKES 7 OS=Arabidopsis thaliana OX=3702 GN=PILS7 PE=2 SV=1	PF03547	Membrane transport protein	GO:0055085	transmembrane transport	--	--	GO:0016021	integral component of membrane	--	--
Cluster-29767.190	1387809312	PWA74898.1	2789	0	serine-threonine/tyrosine-protein kinase catalytic domain-containing protein [Artemisia annua]	XM_022164060.1	XM_022164060	527	0	PREDICTED: Helianthus annuus wall-associated receptor kinase-like 14 (LOC110919805), mRNA	--	--	--	--	Q8RY67	1473	1e-161	Wall-associated receptor kinase-like 14 OS=Arabidopsis thaliana OX=3702 GN=WAKL14 PE=2 SV=2	PF00069//PF07714//PF06247	Protein kinase domain//Protein tyrosine and serine/threonine kinase//Pvs28 EGF domain	GO:0006468	protein phosphorylation	GO:0005524//GO:0004672	ATP binding//protein kinase activity	GO:0009986//GO:0016020	cell surface//membrane	--	--
Cluster-29767.80062	1387798570	PWA65815.1	159	2.5e-08	hypothetical protein CTI12_AA333710 [Artemisia annua]	XM_015758770.2	XM_015758770	66	2.63e-24	PREDICTED: Oryza sativa Japonica Group enolase-like (LOC4348176), mRNA	K01689	ENO, eno	enolase	http://www.genome.jp/dbget-bin/www_bget?ko:K01689	P25696	143	6.7e-08	Bifunctional enolase 2/transcriptional activator OS=Arabidopsis thaliana OX=3702 GN=ENO2 PE=1 SV=1	PF02366	Dolichyl-phosphate-mannose-protein mannosyltransferase	GO:0006493	protein O-linked glycosylation	GO:0000030	mannosyltransferase activity	GO:0016020//GO:0000136	membrane//alpha-1,6-mannosyltransferase complex	KOG2670	Enolase
Cluster-31223.0	--	--	--	--	--	--	--	--	--	--	--	--	--	--	--	--	--	--	--	--	--	--	--	--	--	--	--	--
Cluster-19802.0	--	--	--	--	--	--	--	--	--	--	--	--	--	--	--	--	--	--	--	--	--	--	--	--	--	--	--	--
Cluster-31337.0	--	--	--	--	--	KP332101.1	KP332101	36	7.14e-08	Chrysanthemum x morifolium microsatellite JH-260 sequence	--	--	--	--	--	--	--	--	--	--	--	--	--	--	--	--	--	--
Cluster-29767.199	--	--	--	--	--	--	--	--	--	--	--	--	--	--	--	--	--	--	--	--	--	--	--	--	--	--	--	--
Cluster-29767.198	--	--	--	--	--	--	--	--	--	--	--	--	--	--	--	--	--	--	--	--	--	--	--	--	--	--	--	--
Cluster-29767.1698	--	--	--	--	--	XM_022150237.1	XM_022150237	33	2.16e-06	PREDICTED: Helianthus annuus cationic amino acid transporter 2, vacuolar-like (LOC110904379), transcript variant X2, mRNA	--	--	--	--	--	--	--	--	--	--	--	--	--	--	--	--	--	--
Cluster-29767.17187	1387834454	PWA97655.1	237	2.3e-17	alpha/beta-Hydrolases superfamily protein [Artemisia annua]	--	--	--	--	--	K06130	LYPLA2	lysophospholipase II	http://www.genome.jp/dbget-bin/www_bget?ko:K06130	--	--	--	--	PF02230	Phospholipase/Carboxylesterase	--	--	GO:0016787	hydrolase activity	--	--	--	--
Cluster-29767.88364	1387801403	PWA68181.1	1512	1.4e-164	F-box domain-containing protein [Artemisia annua]	--	--	--	--	--	--	--	--	--	--	--	--	--	PF16331//PF06825	TolA binding protein trimerisation//Heat shock factor binding protein 1	GO:0070206	protein trimerization	GO:0003714	transcription corepressor activity	GO:0005667	transcription regulator complex	--	--
Cluster-29767.17185	1387769060	PWA43788.1	187	1.6e-11	exostosin-like protein [Artemisia annua]	--	--	--	--	--	--	--	--	--	--	--	--	--	--	--	--	--	--	--	--	--	--	--
Cluster-29767.88362	1387817802	PWA82372.1	546	1.3e-53	protein kinase-like domain, Phloem protein 2-like protein [Artemisia annua]	--	--	--	--	--	K04733	IRAK4	interleukin-1 receptor-associated kinase 4	http://www.genome.jp/dbget-bin/www_bget?ko:K04733	O80623	216	8.9e-17	Probable receptor-like protein kinase At2g39360 OS=Arabidopsis thaliana OX=3702 GN=At2g39360 PE=1 SV=1	PF00069//PF07714	Protein kinase domain//Protein tyrosine and serine/threonine kinase	GO:0006468	protein phosphorylation	GO:0004672//GO:0005524	protein kinase activity//ATP binding	--	--	--	--
Cluster-29767.88363	1387770782	PWA44911.1	138	2.3e-06	phloem protein 2-A15 [Artemisia annua]	--	--	--	--	--	--	--	--	--	--	--	--	--	--	--	--	--	--	--	--	--	--	--
Cluster-29767.88360	--	--	--	--	--	--	--	--	--	--	--	--	--	--	--	--	--	--	--	--	--	--	--	--	--	--	--	--
Cluster-29767.88361	--	--	--	--	--	--	--	--	--	--	--	--	--	--	--	--	--	--	--	--	--	--	--	--	--	--	--	--
Cluster-29767.1690	--	--	--	--	--	--	--	--	--	--	--	--	--	--	--	--	--	--	--	--	--	--	--	--	--	--	--	--
Cluster-29767.1691	--	--	--	--	--	--	--	--	--	--	--	--	--	--	--	--	--	--	--	--	--	--	--	--	--	--	--	--
Cluster-29767.1692	--	--	--	--	--	--	--	--	--	--	--	--	--	--	--	--	--	--	--	--	--	--	--	--	--	--	--	--
Cluster-29767.1693	1387817373	PWA81988.1	418	8.9e-39	Armadillo-like helical [Artemisia annua]	--	--	--	--	--	--	--	--	--	--	--	--	--	--	--	--	--	--	--	--	--	--	--
Cluster-29767.1694	1387809347	PWA74928.1	502	4.3e-48	chaperone DnaJ-domain superfamily protein [Artemisia annua]	XM_025139688.1	XM_025139688	118	3.41e-53	PREDICTED: Cynara cardunculus var. scolymus uncharacterized LOC112528666 (LOC112528666), mRNA	--	--	--	--	--	--	--	--	--	--	--	--	--	--	--	--	--	--
Cluster-29767.1695	--	--	--	--	--	--	--	--	--	--	--	--	--	--	--	--	--	--	--	--	--	--	--	--	--	--	--	--
Cluster-29767.17188	--	--	--	--	--	--	--	--	--	--	--	--	--	--	--	--	--	--	--	--	--	--	--	--	--	--	--	--
Cluster-29767.88369	1387836072	PWA99193.1	478	1.6e-45	glycosyl transferase, family 1 [Artemisia annua]	CP023117.1	CP023117	127	2.07e-58	Lupinus angustifolius cultivar Tanjil chromosome LG-05	--	--	--	--	Q9S7D1	428	3.9e-41	Digalactosyldiacylglycerol synthase 1, chloroplastic OS=Arabidopsis thaliana OX=3702 GN=DGD1 PE=1 SV=1	--	--	--	--	--	--	--	--	--	--
Cluster-29767.101718	1389813967	XP_024971693.1	287	2.5e-23	uncharacterized protein LOC112510493, partial [Cynara cardunculus var. scolymus]	--	--	--	--	--	--	--	--	--	--	--	--	--	--	--	--	--	--	--	--	--	--	--
Cluster-27095.0	--	--	--	--	--	--	--	--	--	--	--	--	--	--	--	--	--	--	--	--	--	--	--	--	--	--	--	--
Cluster-29767.93044	--	--	--	--	--	--	--	--	--	--	--	--	--	--	--	--	--	--	--	--	--	--	--	--	--	--	--	--
Cluster-29767.110331	1387772453	PWA46028.1	346	1.9e-30	reverse transcriptase domain-containing protein [Artemisia annua]	--	--	--	--	--	--	--	--	--	--	--	--	--	PF04827	Plant transposon protein	--	--	GO:0016788	hydrolase activity, acting on ester bonds	--	--	--	--
Cluster-29767.19120	1389807832	XP_024968431.1	770	8.1e-79	ethylene-responsive transcription factor-like protein At4g13040 isoform X1 [Cynara cardunculus var. scolymus]	XM_023903446.1	XM_023903446	284	4.06e-145	PREDICTED: Lactuca sativa ethylene-responsive transcription factor-like protein At4g13040 (LOC111907646), transcript variant X4, mRNA	--	--	--	--	Q56XP9	378	8.8e-35	Ethylene-responsive transcription factor-like protein At4g13040 OS=Arabidopsis thaliana OX=3702 GN=At4g13040 PE=2 SV=2	PF02115//PF00847	RHO protein GDP dissociation inhibitor//AP2 domain	GO:0006355	regulation of transcription, DNA-templated	GO:0003700//GO:0005094	DNA-binding transcription factor activity//Rho GDP-dissociation inhibitor activity	GO:0005667//GO:0005737	transcription regulator complex//cytoplasm	--	--
Cluster-29767.101710	--	--	--	--	--	--	--	--	--	--	--	--	--	--	--	--	--	--	--	--	--	--	--	--	--	--	--	--
Cluster-12959.0	1387782918	PWA53430.1	225	2.4e-16	mannitol dehydrogenase [Artemisia annua]	LR031878.1	LR031878	32	8.79e-06	Brassica oleracea HDEM genome, scaffold: C1	K00083	E1.1.1.195	cinnamyl-alcohol dehydrogenase	http://www.genome.jp/dbget-bin/www_bget?ko:K00083	Q2KNL6	177	3.4e-12	Geraniol dehydrogenase 1 OS=Ocimum basilicum OX=39350 GN=GEDH1 PE=1 SV=1	PF00107	Zinc-binding dehydrogenase	GO:0055114	oxidation-reduction process	--	--	--	--	--	--
Cluster-29767.101712	1387819057	PWA83492.1	1934	1.8e-213	tetratricopeptide repeat (TPR)-like superfamily protein [Artemisia annua]	XM_025120514.1	XM_025120514	540	0	PREDICTED: Cynara cardunculus var. scolymus pentatricopeptide repeat-containing protein At4g22760 (LOC112514185), mRNA	--	--	--	--	P0C8Q5	1092	3e-117	Pentatricopeptide repeat-containing protein At4g22760 OS=Arabidopsis thaliana OX=3702 GN=PCMP-E6 PE=2 SV=1	PF00515//PF17049//PF07721//PF02927//PF13176	Tetratricopeptide repeat//ATPase expression protein 1//Tetratricopeptide repeat//Cellulase N-terminal ig-like domain//Tetratricopeptide repeat	GO:0005982//GO:0005975//GO:0006417//GO:0005985	starch metabolic process//carbohydrate metabolic process//regulation of translation//sucrose metabolic process	GO:0045182//GO:0042802//GO:0008810//GO:0005515	translation regulator activity//identical protein binding//cellulase activity//protein binding	--	--	--	--
Cluster-29767.101713	--	--	--	--	--	--	--	--	--	--	--	--	--	--	--	--	--	--	--	--	--	--	--	--	--	--	--	--
Cluster-29767.101714	1228841977	XP_021978389.1	863	1.1e-89	protein OVEREXPRESSOR OF CATIONIC PEROXIDASE 3 [Helianthus annuus]	MG893067.1	MG893067	472	0	Pluchea indica clone TRINITY_DN23317_c0_g1_i1 microsatellite sequence	--	--	--	--	Q8H0V5	468	2.6e-45	Protein OVEREXPRESSOR OF CATIONIC PEROXIDASE 3 OS=Arabidopsis thaliana OX=3702 GN=OCP3 PE=1 SV=1	PF00046	Homeodomain	--	--	GO:0003677	DNA binding	--	--	--	--
Cluster-29767.101715	--	--	--	--	--	--	--	--	--	--	--	--	--	--	--	--	--	--	--	--	--	--	--	--	--	--	--	--
Cluster-29767.101716	--	--	--	--	--	--	--	--	--	--	--	--	--	--	--	--	--	--	--	--	--	--	--	--	--	--	--	--
Cluster-29767.101717	--	--	--	--	--	--	--	--	--	--	--	--	--	--	--	--	--	--	--	--	--	--	--	--	--	--	--	--
Cluster-11654.0	--	--	--	--	--	--	--	--	--	--	--	--	--	--	--	--	--	--	--	--	--	--	--	--	--	--	--	--
Cluster-29767.102441	--	--	--	--	--	--	--	--	--	--	--	--	--	--	--	--	--	--	--	--	--	--	--	--	--	--	--	--
Cluster-6865.0	1387788267	PWA57504.1	398	3.8e-36	UBA-like protein [Artemisia annua]	--	--	--	--	--	--	--	--	--	--	--	--	--	PF02601//PF06005//PF02845	Exonuclease VII, large subunit//Cell division protein ZapB//CUE domain	GO:0090529//GO:0043093//GO:0006308	cell septum assembly//FtsZ-dependent cytokinesis//DNA catabolic process	GO:0005515//GO:0008855	protein binding//exodeoxyribonuclease VII activity	GO:0005737//GO:0009318	cytoplasm//exodeoxyribonuclease VII complex	--	--
Cluster-23844.0	1293573230	PKA48313.1	294	3.6e-24	Retrovirus-related Pol polyprotein from transposon TNT 1-94 [Apostasia shenzhenica]	--	--	--	--	--	--	--	--	--	P10978	196	3.2e-14	Retrovirus-related Pol polyprotein from transposon TNT 1-94 OS=Nicotiana tabacum OX=4097 PE=2 SV=1	--	--	--	--	--	--	--	--	--	--
Cluster-3823.0	--	--	--	--	--	--	--	--	--	--	--	--	--	--	--	--	--	--	--	--	--	--	--	--	--	--	--	--
Cluster-32935.0	1315717947	PKU81559.1	447	3.3e-42	Cinnamoyl-CoA reductase 1 [Dendrobium catenatum]	XM_020227450.1	XM_020227450	145	1e-68	PREDICTED: Ananas comosus cinnamoyl-CoA reductase 1-like (LOC109706538), mRNA	K09753	CCR	cinnamoyl-CoA reductase	http://www.genome.jp/dbget-bin/www_bget?ko:K09753	Q9S9N9	335	1.2e-30	Cinnamoyl-CoA reductase 1 OS=Arabidopsis thaliana OX=3702 GN=CCR1 PE=1 SV=1	PF01370	NAD dependent epimerase/dehydratase family	--	--	GO:0050662//GO:0003824	obsolete coenzyme binding//catalytic activity	--	--	--	--
Cluster-11153.0	--	--	--	--	--	--	--	--	--	--	--	--	--	--	--	--	--	--	--	--	--	--	--	--	--	--	--	--
Cluster-29767.113409	--	--	--	--	--	--	--	--	--	--	--	--	--	--	--	--	--	--	--	--	--	--	--	--	--	--	--	--
Cluster-12457.0	1387763161	PWA40219.1	784	7.4e-81	hypothetical protein CTI12_AA564850 [Artemisia annua]	XM_025118072.1	XM_025118072	116	3.78e-52	PREDICTED: Cynara cardunculus var. scolymus uncharacterized LOC112512207 (LOC112512207), partial mRNA	--	--	--	--	--	--	--	--	--	--	--	--	--	--	--	--	--	--
Cluster-29767.39163	1387793782	PWA61874.1	863	1.6e-89	ATPase, F1/V1/A1 complex, alpha/beta subunit, Zinc knuckle CX2CX4HX4C [Artemisia annua]	--	--	--	--	--	--	--	--	--	F4IS91	175	3.7e-11	Protein SHORT ROOT IN SALT MEDIUM 1 OS=Arabidopsis thaliana OX=3702 GN=RSA1 PE=1 SV=1	--	--	--	--	--	--	--	--	--	--
Cluster-29767.57576	1516552949	VDC96606.1	785	9e-81	unnamed protein product, partial [Brassica oleracea]	XM_025118008.1	XM_025118008	360	0	PREDICTED: Cynara cardunculus var. scolymus calmodulin-7-like (LOC112512147), mRNA	K02183	CALM	calmodulin	http://www.genome.jp/dbget-bin/www_bget?ko:K02183	P59220	761	2.1e-79	Calmodulin-7 OS=Arabidopsis thaliana OX=3702 GN=CAM7 PE=1 SV=2	PF03874//PF00036//PF12763//PF13405//PF13499//PF10591//PF13202//PF00404//PF02563	RNA polymerase Rpb4//EF hand//Cytoskeletal-regulatory complex EF hand//EF-hand domain//EF-hand domain pair//Secreted protein acidic and rich in cysteine Ca binding region//EF hand//Dockerin type I domain//Polysaccharide biosynthesis/export protein	GO:0005975//GO:0015774//GO:0006352//GO:0000272	carbohydrate metabolic process//polysaccharide transport//DNA-templated transcription, initiation//polysaccharide catabolic process	GO:0015159//GO:0004553//GO:0005509//GO:0005515	polysaccharide transmembrane transporter activity//hydrolase activity, hydrolyzing O-glycosyl compounds//calcium ion binding//protein binding	GO:0030880//GO:0016020	RNA polymerase complex//membrane	KOG0027	Calmodulin and related proteins (EF-Hand superfamily)
Cluster-6407.0	1387806224	PWA72246.1	466	3.1e-44	hypothetical protein CTI12_AA091260 [Artemisia annua]	--	--	--	--	--	--	--	--	--	P04146	206	1.7e-15	Copia protein OS=Drosophila melanogaster OX=7227 GN=GIP PE=1 SV=3	--	--	--	--	--	--	--	--	--	--
Cluster-9750.0	1389733581	XP_024962391.1	379	2.6e-34	uncharacterized protein LOC112502652 [Cynara cardunculus var. scolymus]	--	--	--	--	--	--	--	--	--	--	--	--	--	--	--	--	--	--	--	--	--	--	--
Cluster-29767.80150	1387817925	PWA82484.1	3735	0	curculin-like (mannose-binding) lectin family protein / PAN domain-containing protein [Artemisia annua]	XM_022114137.1	XM_022114137	828	0	PREDICTED: Helianthus annuus G-type lectin S-receptor-like serine/threonine-protein kinase SD3-1 (LOC110864962), mRNA	--	--	--	--	P93756	1807	3.4e-200	G-type lectin S-receptor-like serine/threonine-protein kinase SD3-1 OS=Arabidopsis thaliana OX=3702 GN=SD31 PE=3 SV=1	PF08831//PF00954//PF00069//PF07714	Class II MHC-associated invariant chain trimerisation domain//S-locus glycoprotein domain//Protein kinase domain//Protein tyrosine and serine/threonine kinase	GO:0007165//GO:0006468//GO:0019882//GO:0048544	signal transduction//protein phosphorylation//antigen processing and presentation//recognition of pollen	GO:0005524//GO:0004672//GO:0042289	ATP binding//protein kinase activity//MHC class II protein binding	GO:0016021//GO:0042613	integral component of membrane//MHC class II protein complex	--	--
Cluster-29767.80153	1387828259	PWA91862.1	3811	0	forkhead-associated domain-containing protein / FHA domain-containing protein [Artemisia annua]	XM_025120302.1	XM_025120302	946	0	PREDICTED: Cynara cardunculus var. scolymus uncharacterized LOC112514019 (LOC112514019), mRNA	--	--	--	--	Q8H1D9	134	3.5e-06	Tyrosyl-DNA phosphodiesterase 1 OS=Arabidopsis thaliana OX=3702 GN=TDP1 PE=1 SV=1	PF08797//PF10166//PF06087//PF01409//PF00498	HIRAN domain//Uncharacterised conserved protein (DUF2368)//Tyrosyl-DNA phosphodiesterase//tRNA synthetases class II core domain (F)//FHA domain	GO:0006281//GO:0006418//GO:0010756//GO:0043039	DNA repair//tRNA aminoacylation for protein translation//positive regulation of plasminogen activation//tRNA aminoacylation	GO:0005515//GO:0000049//GO:0003676//GO:0016818//GO:0005524//GO:0008081//GO:0008270//GO:0004812	protein binding//tRNA binding//nucleic acid binding//hydrolase activity, acting on acid anhydrides, in phosphorus-containing anhydrides//ATP binding//phosphoric diester hydrolase activity//zinc ion binding//aminoacyl-tRNA ligase activity	GO:0005634//GO:0005887	nucleus//integral component of plasma membrane	--	--
Cluster-29767.9046	--	--	--	--	--	--	--	--	--	--	--	--	--	--	--	--	--	--	PF10717	Occlusion-derived virus envelope protein ODV-E18	--	--	--	--	GO:0019031	viral envelope	--	--
Cluster-29767.9041	1387798553	PWA65801.1	1356	6.1e-147	2-oxoglutarate (2OG) and Fe(II)-dependent oxygenase superfamily protein [Artemisia annua]	XM_025131427.1	XM_025131427	462	0	PREDICTED: Cynara cardunculus var. scolymus protein SRG1 (LOC112522299), mRNA	--	--	--	--	Q39224	560	4.6e-56	Protein SRG1 OS=Arabidopsis thaliana OX=3702 GN=SRG1 PE=2 SV=1	PF03171	2OG-Fe(II) oxygenase superfamily	GO:0055114	oxidation-reduction process	GO:0016491	oxidoreductase activity	--	--	--	--
Cluster-29767.3024	--	--	--	--	--	--	--	--	--	--	--	--	--	--	--	--	--	--	--	--	--	--	--	--	--	--	--	--
Cluster-29767.80157	1387802890	PWA69422.1	323	1.2e-27	Thioredoxin-like fold [Artemisia annua]	XM_022172199.1	XM_022172199	97	7.27e-42	PREDICTED: Helianthus annuus uncharacterized LOC110929080 (LOC110929080), transcript variant X2, mRNA	--	--	--	--	--	--	--	--	--	--	--	--	--	--	--	--	--	--
Cluster-29767.9042	--	--	--	--	--	--	--	--	--	--	--	--	--	--	--	--	--	--	--	--	--	--	--	--	--	--	--	--
Cluster-29767.3029	1387824745	PWA88630.1	288	1e-23	hypothetical protein CTI12_AA118650 [Artemisia annua]	--	--	--	--	--	K07466	RFA1, RPA1, rpa	replication factor A1	http://www.genome.jp/dbget-bin/www_bget?ko:K07466	--	--	--	--	PF04057	Replication factor-A protein 1, N-terminal domain	GO:0006260	DNA replication	GO:0003677	DNA binding	GO:0005634	nucleus	--	--
Cluster-29767.3028	1387828017	PWA91639.1	354	8.1e-31	Zinc finger, PMZ-type [Artemisia annua]	--	--	--	--	--	--	--	--	--	--	--	--	--	--	--	--	--	--	--	--	--	--	--
Cluster-29767.9049	599473744	AHN62856.1	382	1.2e-34	costunolide synthase [Tanacetum parthenium]	KC441528.1	KC441528	274	2.03e-140	Tanacetum cinerariifolium clone Ct8828 costunolide mRNA, complete cds	--	--	--	--	X2JE85	382	4.5e-36	Costunolide synthase OS=Tanacetum parthenium OX=127999 GN=CYP71BL2 PE=1 SV=1	PF00067	Cytochrome P450	GO:0055114	oxidation-reduction process	GO:0005506//GO:0020037//GO:0016705	iron ion binding//heme binding//oxidoreductase activity, acting on paired donors, with incorporation or reduction of molecular oxygen	--	--	--	--
Cluster-29767.113908	356540099	XP_003538528.1	140	6e-06	adenosylhomocysteinase [Glycine max]	--	--	--	--	--	K01251	E3.3.1.1, ahcY	adenosylhomocysteinase	http://www.genome.jp/dbget-bin/www_bget?ko:K01251	Q9SWF5	140	2.3e-07	Adenosylhomocysteinase OS=Solanum lycopersicum OX=4081 GN=SAHH PE=2 SV=1	--	--	--	--	--	--	--	--	--	--
Cluster-29767.77978	--	--	--	--	--	--	--	--	--	--	--	--	--	--	--	--	--	--	--	--	--	--	--	--	--	--	--	--
Cluster-29767.39169	--	--	--	--	--	--	--	--	--	--	--	--	--	--	--	--	--	--	--	--	--	--	--	--	--	--	--	--
Cluster-29767.36575	--	--	--	--	--	--	--	--	--	--	--	--	--	--	--	--	--	--	--	--	--	--	--	--	--	--	--	--
Cluster-28057.0	--	--	--	--	--	--	--	--	--	--	--	--	--	--	--	--	--	--	--	--	--	--	--	--	--	--	--	--
Cluster-29767.100164	1387823902	PWA87863.1	246	3.1e-18	RING/U-box superfamily protein [Artemisia annua]	--	--	--	--	--	--	--	--	--	--	--	--	--	--	--	--	--	--	--	--	--	--	--
Cluster-29767.91658	1387819829	PWA84176.1	990	2.2e-104	protein kinase-like domain, Concanavalin A-like lectin/glucanase domain protein [Artemisia annua]	XM_022166750.1	XM_022166750	294	9.87e-151	PREDICTED: Helianthus annuus rust resistance kinase Lr10-like (LOC110922449), mRNA	K04733	IRAK4	interleukin-1 receptor-associated kinase 4	http://www.genome.jp/dbget-bin/www_bget?ko:K04733	Q9FF29	592	1.2e-59	PR5-like receptor kinase OS=Arabidopsis thaliana OX=3702 GN=PR5K PE=1 SV=1	PF07714//PF00069//PF13947	Protein tyrosine and serine/threonine kinase//Protein kinase domain//Wall-associated receptor kinase galacturonan-binding	GO:0006468	protein phosphorylation	GO:0004672//GO:0005524//GO:0030247	protein kinase activity//ATP binding//polysaccharide binding	--	--	--	--
Cluster-22243.0	--	--	--	--	--	--	--	--	--	--	--	--	--	--	--	--	--	--	--	--	--	--	--	--	--	--	--	--
Cluster-16881.0	--	--	--	--	--	--	--	--	--	--	--	--	--	--	--	--	--	--	--	--	--	--	--	--	--	--	--	--
Cluster-29767.36573	1387818149	PWA82682.1	1224	1.5e-131	hypothetical protein CTI12_AA045980 [Artemisia annua]	XM_022153329.1	XM_022153329	302	3.32e-155	PREDICTED: Helianthus annuus exonuclease V, chloroplastic (LOC110908393), mRNA	K17815	EXO5	exonuclease V	http://www.genome.jp/dbget-bin/www_bget?ko:K17815	Q9FKK6	520	2.5e-51	Exonuclease V, chloroplastic OS=Arabidopsis thaliana OX=3702 GN=At5g60370 PE=2 SV=1	PF09810	Exonuclease V - a 5' deoxyribonuclease	GO:0006308	DNA catabolic process	GO:0045145	single-stranded DNA 5'-3' exodeoxyribonuclease activity	--	--	KOG4760	Uncharacterized conserved protein
Cluster-29767.2384	--	--	--	--	--	--	--	--	--	--	--	--	--	--	--	--	--	--	--	--	--	--	--	--	--	--	--	--
Cluster-16251.0	--	--	--	--	--	KU253421.1	KU253421	82	2.01e-33	Chrysanthemum x morifolium clone CmfzqFL-3 LFY-like protein (FL) gene, complete cds	--	--	--	--	--	--	--	--	--	--	--	--	--	--	--	--	--	--
Cluster-29767.99647	1387826306	PWA90055.1	692	2.8e-70	S-locus glycoprotein domain-containing protein [Artemisia annua]	--	--	--	--	--	--	--	--	--	Q9CAL3	479	5.3e-47	Cysteine-rich receptor-like protein kinase 2 OS=Arabidopsis thaliana OX=3702 GN=CRK2 PE=1 SV=1	--	--	--	--	--	--	--	--	--	--
Cluster-29767.99646	--	--	--	--	--	--	--	--	--	--	--	--	--	--	--	--	--	--	--	--	--	--	--	--	--	--	--	--
Cluster-29767.99645	1387787772	PWA57120.1	349	4.8e-30	hypothetical protein CTI12_AA412280 [Artemisia annua]	--	--	--	--	--	--	--	--	--	--	--	--	--	PF01907//PF02230	Ribosomal protein L37e//Phospholipase/Carboxylesterase	GO:0042254//GO:0006412	ribosome biogenesis//translation	GO:0016787//GO:0003735	hydrolase activity//structural constituent of ribosome	GO:0005840	ribosome	--	--
Cluster-29767.99644	--	--	--	--	--	--	--	--	--	--	--	--	--	--	--	--	--	--	PF00737	Photosystem II 10 kDa phosphoprotein	GO:0015979//GO:0050821	photosynthesis//protein stabilization	GO:0042301	phosphate ion binding	GO:0016020//GO:0009523	membrane//photosystem II	--	--
Cluster-29767.99643	1389825844	XP_024978060.1	946	5.2e-99	protein ACCELERATED CELL DEATH 6-like isoform X4 [Cynara cardunculus var. scolymus]	XM_023898420.1	XM_023898420	109	1.28e-47	PREDICTED: Lactuca sativa uncharacterized LOC111902595 (LOC111902595), mRNA	--	--	--	--	A2CIR5	150	3.9e-08	Ankyrin repeat-containing protein NPR4 OS=Oryza sativa subsp. japonica OX=39947 GN=NPR4 PE=2 SV=1	PF13606	Ankyrin repeat	--	--	GO:0005515	protein binding	--	--	--	--
Cluster-29767.102778	--	--	--	--	--	--	--	--	--	--	--	--	--	--	--	--	--	--	--	--	--	--	--	--	--	--	--	--
Cluster-29767.99641	1387811143	PWA76496.1	449	1.1e-41	pirin-like protein [Artemisia annua]	--	--	--	--	--	--	--	--	--	--	--	--	--	--	--	--	--	--	--	--	--	--	--
Cluster-29767.113903	1387772556	PWA46097.1	1271	3.2e-137	UDP-glucuronosyl/UDP-glucosyltransferase [Artemisia annua]	XM_022127756.1	XM_022127756	337	6.78e-175	PREDICTED: Helianthus annuus UDP-glycosyltransferase 85C2-like (LOC110879311), mRNA	K21374	-	-	http://www.genome.jp/dbget-bin/www_bget?ko:K21374	Q6VAB0	1117	8.7e-121	UDP-glycosyltransferase 85C2 OS=Stevia rebaudiana OX=55670 GN=UGT85C2 PE=1 SV=1	PF04101//PF00201	Glycosyltransferase family 28 C-terminal domain//UDP-glucoronosyl and UDP-glucosyl transferase	--	--	GO:0016758	transferase activity, transferring hexosyl groups	--	--	--	--
Cluster-29767.8312	--	--	--	--	--	--	--	--	--	--	--	--	--	--	--	--	--	--	--	--	--	--	--	--	--	--	--	--
Cluster-24850.0	1179505735	XP_020676175.1	434	1.3e-40	photosystem I reaction center subunit N, chloroplastic [Dendrobium catenatum]	XM_026549674.1	XM_026549674	100	1.28e-43	PREDICTED: Papaver somniferum photosystem I reaction center subunit N, chloroplastic-like (LOC113300461), mRNA	K02701	psaN	photosystem I subunit PsaN	http://www.genome.jp/dbget-bin/www_bget?ko:K02701	P49107	274	1.8e-23	Photosystem I reaction center subunit N, chloroplastic OS=Arabidopsis thaliana OX=3702 GN=PSAN PE=1 SV=2	PF05757//PF05479	Oxygen evolving enhancer protein 3 (PsbQ)//Photosystem I reaction centre subunit N (PSAN or PSI-N)	GO:0015979	photosynthesis	GO:0005509	calcium ion binding	GO:0009523//GO:0009654//GO:0019898//GO:0009522	photosystem II//photosystem II oxygen evolving complex//extrinsic component of membrane//photosystem I	--	--
Cluster-29767.8310	1387831615	PWA94980.1	1237	3.7e-133	benzoate carboxyl methyltransferase [Artemisia annua]	XM_025108614.1	XM_025108614	223	2.13e-111	PREDICTED: Cynara cardunculus var. scolymus benzoate carboxyl methyltransferase-like (LOC112504667), mRNA	K21482	-	-	http://www.genome.jp/dbget-bin/www_bget?ko:K21482	Q9FYZ9	680	5.5e-70	Benzoate carboxyl methyltransferase OS=Antirrhinum majus OX=4151 GN=BAMT PE=1 SV=1	PF08241//PF02040//PF03492	Methyltransferase domain//Arsenical pump membrane protein//SAM dependent carboxyl methyltransferase	GO:0015700	arsenite transport	GO:0015105//GO:0008168	arsenite transmembrane transporter activity//methyltransferase activity	GO:0016021	integral component of membrane	--	--
Cluster-26461.0	--	--	--	--	--	--	--	--	--	--	--	--	--	--	--	--	--	--	PF06085//PF07263	Lipoprotein Rz1 precursor//Dentin matrix protein 1 (DMP1)	GO:0019076//GO:0019835//GO:0001503//GO:0030198	viral release from host cell//cytolysis//ossification//extracellular matrix organization	--	--	--	--	--	--
Cluster-15491.0	--	--	--	--	--	--	--	--	--	--	--	--	--	--	--	--	--	--	--	--	--	--	--	--	--	--	--	--
Cluster-29767.8317	1387792066	PWA60496.1	260	5.5e-20	early nodulin-like protein 9 [Artemisia annua]	BX817613.1	BX817613	35	5.17e-07	Arabidopsis thaliana Full-length cDNA Complete sequence from clone GSLTSIL32ZF09 of Silique of strain col-0 of Arabidopsis thaliana (thale cress)	--	--	--	--	--	--	--	--	--	--	--	--	--	--	--	--	--	--
Cluster-29767.99649	1387824703	PWA88592.1	250	1.9e-18	ypt/Rab-GAP domain of gyp1p superfamily protein [Artemisia annua]	XM_026590930.1	XM_026590930	34	4.63e-06	PREDICTED: Papaver somniferum vacuolar protein sorting-associated protein 52 A-like (LOC113347304), mRNA	--	--	--	--	--	--	--	--	PF01536	Adenosylmethionine decarboxylase	GO:0006560//GO:0006597//GO:0008295//GO:0006525	proline metabolic process//spermine biosynthetic process//spermidine biosynthetic process//arginine metabolic process	GO:0004014	adenosylmethionine decarboxylase activity	--	--	--	--
Cluster-29767.99648	--	--	--	--	--	--	--	--	--	--	--	--	--	--	--	--	--	--	PF06003	Survival motor neuron protein (SMN)	GO:0006397	mRNA processing	GO:0003723	RNA binding	GO:0005737//GO:0005634	cytoplasm//nucleus	--	--
Cluster-1189.0	1377602180	GBG30372.1	170	4.7e-10	Kynurenine/alpha-aminoadipate aminotransferase, mitochondrial [Hondaea fermentalgiana]	--	--	--	--	--	K00825	AADAT, KAT2	kynurenine/2-aminoadipate aminotransferase	http://www.genome.jp/dbget-bin/www_bget?ko:K00825	P95957	272	2.7e-23	Uncharacterized aminotransferase SSO0104 OS=Saccharolobus solfataricus (strain ATCC 35092 / DSM 1617 / JCM 11322 / P2) OX=273057 GN=SSO0104 PE=3 SV=1	PF00474//PF00155	Sodium:solute symporter family//Aminotransferase class I and II	GO:0055085//GO:0009058	transmembrane transport//biosynthetic process	GO:0022857//GO:0030170	transmembrane transporter activity//pyridoxal phosphate binding	GO:0016020	membrane	--	--
Cluster-29767.91657	1387819829	PWA84176.1	925	6.7e-97	protein kinase-like domain, Concanavalin A-like lectin/glucanase domain protein [Artemisia annua]	XM_023903381.1	XM_023903381	291	4.08e-149	PREDICTED: Lactuca sativa LEAF RUST 10 DISEASE-RESISTANCE LOCUS RECEPTOR-LIKE PROTEIN KINASE-like 2.4 (LOC111907576), transcript variant X2, mRNA	K04733	IRAK4	interleukin-1 receptor-associated kinase 4	http://www.genome.jp/dbget-bin/www_bget?ko:K04733	Q9FF29	529	2.1e-52	PR5-like receptor kinase OS=Arabidopsis thaliana OX=3702 GN=PR5K PE=1 SV=1	PF07714//PF00069	Protein tyrosine and serine/threonine kinase//Protein kinase domain	GO:0006468	protein phosphorylation	GO:0005524//GO:0004672	ATP binding//protein kinase activity	--	--	--	--
Cluster-29767.17589	1271189179	PHU08384.1	333	1.1e-28	putative ADP-ribosylation factor GTPase-activating protein AGD8 [Capsicum chinense]	XM_022146309.1	XM_022146309	121	4.66e-55	PREDICTED: Helianthus annuus probable ADP-ribosylation factor GTPase-activating protein AGD9 (LOC110899423), mRNA	--	--	--	--	Q8H100	306	5.7e-27	Probable ADP-ribosylation factor GTPase-activating protein AGD8 OS=Arabidopsis thaliana OX=3702 GN=AGD8 PE=1 SV=1	PF01412	Putative GTPase activating protein for Arf	--	--	GO:0005096	GTPase activator activity	--	--	KOG0706	Predicted GTPase-activating protein
Cluster-29767.91650	1387788075	PWA57355.1	1213	3e-130	hypothetical protein CTI12_AA410120 [Artemisia annua]	--	--	--	--	--	--	--	--	--	Q94HW2	203	1.5e-14	Retrovirus-related Pol polyprotein from transposon RE1 OS=Arabidopsis thaliana OX=3702 GN=RE1 PE=2 SV=1	PF00642	Zinc finger C-x8-C-x5-C-x3-H type (and similar)	--	--	GO:0046872	metal ion binding	--	--	--	--
Cluster-4627.0	--	--	--	--	--	--	--	--	--	--	--	--	--	--	--	--	--	--	--	--	--	--	--	--	--	--	--	--
Cluster-29767.59513	1387814984	PWA79869.1	744	8.4e-76	CTC-interacting domain 9 [Artemisia annua]	XM_023910119.1	XM_023910119	276	1.15e-140	PREDICTED: Lactuca sativa polyadenylate-binding protein-interacting protein 9-like (LOC111914362), mRNA	--	--	--	--	Q9LPI5	449	5.2e-43	Polyadenylate-binding protein-interacting protein 11 OS=Arabidopsis thaliana OX=3702 GN=CID11 PE=2 SV=1	PF00076	RNA recognition motif. (a.k.a. RRM, RBD, or RNP domain)	--	--	GO:0003676	nucleic acid binding	--	--	--	--
Cluster-29767.113907	--	--	--	--	--	--	--	--	--	--	--	--	--	--	--	--	--	--	--	--	--	--	--	--	--	--	--	--
Cluster-20586.0	1387793335	PWA61512.1	569	3.8e-56	hypothetical protein CTI12_AA369670 [Artemisia annua]	--	--	--	--	--	--	--	--	--	--	--	--	--	PF04726	Microvirus J protein	--	--	GO:0003677	DNA binding	--	--	--	--
Cluster-29767.113904	1387772556	PWA46097.1	1195	1.5e-128	UDP-glucuronosyl/UDP-glucosyltransferase [Artemisia annua]	XM_023900220.1	XM_023900220	180	9.05e-88	PREDICTED: Lactuca sativa UDP-glycosyltransferase 85C2-like (LOC111904454), mRNA	K21374	-	-	http://www.genome.jp/dbget-bin/www_bget?ko:K21374	Q6VAB0	831	9.1e-88	UDP-glycosyltransferase 85C2 OS=Stevia rebaudiana OX=55670 GN=UGT85C2 PE=1 SV=1	--	--	--	--	--	--	--	--	--	--
Cluster-12856.1	1387831490	PWA94862.1	712	9.3e-73	serine/threonine/dual specificity protein kinase, catalytic domain-containing protein [Artemisia annua]	--	--	--	--	--	--	--	--	--	Q9FID9	415	9.7e-40	Probable receptor-like protein kinase At5g38990 OS=Arabidopsis thaliana OX=3702 GN=At5g38990 PE=2 SV=1	PF00069//PF07714	Protein kinase domain//Protein tyrosine and serine/threonine kinase	GO:0006468	protein phosphorylation	GO:0004672//GO:0005524	protein kinase activity//ATP binding	--	--	--	--
Cluster-20179.0	--	--	--	--	--	--	--	--	--	--	--	--	--	--	--	--	--	--	--	--	--	--	--	--	--	--	--	--
Cluster-22336.0	1387799346	PWA66458.1	177	7.7e-11	hypothetical protein CTI12_AA324400 [Artemisia annua]	--	--	--	--	--	--	--	--	--	--	--	--	--	--	--	--	--	--	--	--	--	--	--
Cluster-27950.0	--	--	--	--	--	--	--	--	--	--	--	--	--	--	--	--	--	--	--	--	--	--	--	--	--	--	--	--
Cluster-30619.0	1228859071	XP_021985804.1	252	1.6e-19	uncharacterized protein LOC110881999 [Helianthus annuus]	--	--	--	--	--	--	--	--	--	--	--	--	--	--	--	--	--	--	--	--	--	--	--
Cluster-2349.0	1344045343	XP_023902706.1	799	1.9e-82	thiamine thiazole synthase-like [Quercus suber]	XM_020271011.1	XM_020271011	138	3.13e-64	Diplodia corticola thiazole biosynthetic enzyme (BKCO1_14000103), partial mRNA	K03146	THI4, THI1	thiamine thiazole synthase	http://www.genome.jp/dbget-bin/www_bget?ko:K03146	Q0UQJ9	847	1.9e-89	Thiamine thiazole synthase OS=Phaeosphaeria nodorum (strain SN15 / ATCC MYA-4574 / FGSC 10173) OX=321614 GN=SNOG_05965 PE=3 SV=1	PF01266//PF01494//PF07992	FAD dependent oxidoreductase//FAD binding domain//Pyridine nucleotide-disulphide oxidoreductase	GO:0055114	oxidation-reduction process	GO:0071949//GO:0016491	FAD binding//oxidoreductase activity	--	--	KOG2960	Protein involved in thiamine biosynthesis and DNA damage tolerance
Cluster-6327.0	--	--	--	--	--	--	--	--	--	--	--	--	--	--	--	--	--	--	--	--	--	--	--	--	--	--	--	--
Cluster-22097.0	--	--	--	--	--	--	--	--	--	--	--	--	--	--	--	--	--	--	--	--	--	--	--	--	--	--	--	--
Cluster-5442.0	1387765074	PWA41326.1	555	1.4e-54	nonaspanin (TM9SF), Major facilitator superfamily domain protein [Artemisia annua]	XM_023878766.1	XM_023878766	117	5.18e-53	PREDICTED: Lactuca sativa transmembrane 9 superfamily member 4-like (LOC111882396), transcript variant X5, mRNA	--	--	--	--	Q940S0	370	1.5e-34	Transmembrane 9 superfamily member 2 OS=Arabidopsis thaliana OX=3702 GN=TMN2 PE=2 SV=1	PF02990	Endomembrane protein 70	--	--	--	--	GO:0016021	integral component of membrane	KOG1277	Endosomal membrane proteins, EMP70
Cluster-1422.0	--	--	--	--	--	--	--	--	--	--	--	--	--	--	--	--	--	--	--	--	--	--	--	--	--	--	--	--
Cluster-18803.0	--	--	--	--	--	--	--	--	--	--	--	--	--	--	--	--	--	--	--	--	--	--	--	--	--	--	--	--
Cluster-7504.0	--	--	--	--	--	--	--	--	--	--	--	--	--	--	--	--	--	--	--	--	--	--	--	--	--	--	--	--
Cluster-29767.104872	--	--	--	--	--	--	--	--	--	--	--	--	--	--	--	--	--	--	--	--	--	--	--	--	--	--	--	--
Cluster-13823.0	--	--	--	--	--	--	--	--	--	--	--	--	--	--	--	--	--	--	--	--	--	--	--	--	--	--	--	--
Cluster-25076.0	397624488	EJK67409.1	417	2.9e-38	hypothetical protein THAOC_11564, partial [Thalassiosira oceanica]	--	--	--	--	--	--	--	--	--	P00763	1087	2.3e-117	Anionic trypsin-2 OS=Rattus norvegicus OX=10116 GN=Prss2 PE=1 SV=2	PF00089	Trypsin	GO:0006508	proteolysis	GO:0004252	serine-type endopeptidase activity	--	--	--	--
Cluster-29767.104871	1387827974	PWA91598.1	154	6.6e-08	Nucleic acid-binding, OB-fold [Artemisia annua]	--	--	--	--	--	K03237	EIF2S1	translation initiation factor 2 subunit 1	http://www.genome.jp/dbget-bin/www_bget?ko:K03237	--	--	--	--	--	--	--	--	--	--	--	--	--	--
Cluster-29767.104876	1387788893	PWA58000.1	271	1e-21	zinc finger, PHD-type [Artemisia annua]	--	--	--	--	--	--	--	--	--	--	--	--	--	PF02950//PF00130	Conotoxin//Phorbol esters/diacylglycerol binding domain (C1 domain)	GO:0006810//GO:0009405//GO:0035556	transport//pathogenesis//intracellular signal transduction	GO:0008200	ion channel inhibitor activity	GO:0005576	extracellular region	--	--
Cluster-29767.104877	--	--	--	--	--	--	--	--	--	--	--	--	--	--	--	--	--	--	--	--	--	--	--	--	--	--	--	--
Cluster-29767.104874	--	--	--	--	--	XM_023914229.1	XM_023914229	52	1.04e-16	PREDICTED: Lactuca sativa tRNA threonylcarbamoyladenosine dehydratase (LOC111918585), mRNA	--	--	--	--	--	--	--	--	--	--	--	--	--	--	--	--	--	--
Cluster-29767.104875	1387818903	PWA83353.1	1020	4.4e-108	reverse transcriptase domain, Reverse transcriptase zinc-binding domain protein [Artemisia annua]	--	--	--	--	--	--	--	--	--	--	--	--	--	--	--	--	--	--	--	--	--	--	--
Cluster-29767.104878	1387829429	PWA92943.1	614	1.8e-61	tetratricopeptide repeat (TPR)-like superfamily protein [Artemisia annua]	XM_022148828.1	XM_022148828	174	9.56e-85	PREDICTED: Helianthus annuus pentatricopeptide repeat-containing protein At1g62670, mitochondrial-like (LOC110902089), mRNA	--	--	--	--	Q6NQ83	322	4.9e-29	Pentatricopeptide repeat-containing protein At3g22470, mitochondrial OS=Arabidopsis thaliana OX=3702 GN=At3g22470 PE=1 SV=1	PF13176//PF06734//PF00637	Tetratricopeptide repeat//UL97//Region in Clathrin and VPS	GO:0006886//GO:0016032//GO:0016192	intracellular protein transport//viral process//vesicle-mediated transport	GO:0005515//GO:0004672//GO:0005524	protein binding//protein kinase activity//ATP binding	--	--	--	--
Cluster-29767.104879	--	--	--	--	--	--	--	--	--	--	--	--	--	--	--	--	--	--	--	--	--	--	--	--	--	--	--	--
Cluster-8882.0	--	--	--	--	--	--	--	--	--	--	--	--	--	--	--	--	--	--	--	--	--	--	--	--	--	--	--	--
Cluster-32125.0	1387780345	PWA51553.1	141	2.3e-06	CLAVATA3/ESR-RELATED 11 [Artemisia annua]	--	--	--	--	--	--	--	--	--	--	--	--	--	--	--	--	--	--	--	--	--	--	--
Cluster-797.0	1344074624	XP_023921183.1	150	1.1e-07	uncharacterized transporter C11D3.18C-like [Quercus suber]	XM_018391852.1	XM_018391852	374	0	Fusarium oxysporum f. sp. lycopersici 4287 hypothetical protein partial mRNA	--	--	--	--	P39709	330	5.6e-30	Probable transporter SEO1 OS=Saccharomyces cerevisiae (strain ATCC 204508 / S288c) OX=559292 GN=SEO1 PE=1 SV=1	PF07690	Major Facilitator Superfamily	GO:0055085	transmembrane transport	GO:0022857	transmembrane transporter activity	--	--	--	--
Cluster-6950.0	546310257	XP_005714295.1	253	1.4e-19	Resolvase-like [Chondrus crispus]	--	--	--	--	--	--	--	--	--	P03014	249	1.5e-20	Serine recombinase PinE OS=Escherichia coli (strain K12) OX=83333 GN=pinE PE=3 SV=2	PF00239//PF02796	Resolvase, N terminal domain//Helix-turn-helix domain of resolvase	GO:0006310	DNA recombination	GO:0000150//GO:0003677	recombinase activity//DNA binding	--	--	--	--
Cluster-29767.18491	1387826544	PWA90277.1	172	1.8e-09	hypothetical protein CTI12_AA102890 [Artemisia annua]	--	--	--	--	--	--	--	--	--	--	--	--	--	PF06434	Aconitate hydratase 2 N-terminus	GO:0019643//GO:0046487//GO:0006099	reductive tricarboxylic acid cycle//glyoxylate metabolic process//tricarboxylic acid cycle	GO:0003994	aconitate hydratase activity	--	--	--	--
Cluster-20564.0	1340424984	XP_023763337.1	302	2.2e-25	uncharacterized protein LOC111911819 [Lactuca sativa]	--	--	--	--	--	--	--	--	--	--	--	--	--	--	--	--	--	--	--	--	--	--	--
Cluster-4895.0	1425993346	GBG41899.1	600	6.6e-60	hypothetical protein CBR_g87984, partial [Chara braunii]	AC277396.1	AC277396	341	1.22e-177	Micromonas pusilla CCMP1545 clone BOUY129-J03, complete sequence	--	--	--	--	P0CF91	600	2.5e-61	Putative transposase InsL for insertion sequence element IS186A OS=Escherichia coli (strain K12) OX=83333 GN=insL1 PE=3 SV=1	PF01609	Transposase DDE domain	GO:0006313	transposition, DNA-mediated	GO:0003677//GO:0004803	DNA binding//transposase activity	--	--	--	--
Cluster-29512.0	1387762961	PWA40104.1	623	3.6e-62	Zinc finger, C2H2 [Artemisia annua]	XM_025125140.1	XM_025125140	65	8.7e-24	PREDICTED: Cynara cardunculus var. scolymus transcriptional regulator TAC1-like (LOC112517765), mRNA	--	--	--	--	Q9SR34	144	4.7e-08	Transcriptional regulator TAC1 OS=Arabidopsis thaliana OX=3702 GN=TAC1 PE=2 SV=1	PF00096	Zinc finger, C2H2 type	--	--	GO:0003676	nucleic acid binding	--	--	--	--
Cluster-27318.0	--	--	--	--	--	--	--	--	--	--	--	--	--	--	--	--	--	--	--	--	--	--	--	--	--	--	--	--
Cluster-30642.0	1387810173	PWA75640.1	303	3.8e-25	hypothetical protein CTI12_AA240480 [Artemisia annua]	--	--	--	--	--	--	--	--	--	--	--	--	--	--	--	--	--	--	--	--	--	--	--
Cluster-29767.18490	1387772467	PWA46036.1	314	2.1e-26	helitron helicase-like domain-containing protein [Artemisia annua]	--	--	--	--	--	--	--	--	--	--	--	--	--	--	--	--	--	--	--	--	--	--	--
Cluster-15531.0	--	--	--	--	--	--	--	--	--	--	--	--	--	--	--	--	--	--	--	--	--	--	--	--	--	--	--	--
Cluster-29767.46731	1387769897	PWA44323.1	150	2.6e-07	hypothetical protein CTI12_AA516740 [Artemisia annua]	XM_025129696.1	XM_025129696	67	6.93e-25	PREDICTED: Cynara cardunculus var. scolymus autophagy-related protein 8f-like (LOC112521062), transcript variant X2, mRNA	K08341	GABARAP, ATG8, LC3	GABA(A) receptor-associated protein	http://www.genome.jp/dbget-bin/www_bget?ko:K08341	Q8VYK7	141	1.1e-07	Autophagy-related protein 8f OS=Arabidopsis thaliana OX=3702 GN=ATG8F PE=1 SV=1	PF04110	Ubiquitin-like autophagy protein Apg12	GO:0000045	autophagosome assembly	--	--	GO:0005737	cytoplasm	KOG1654	Microtubule-associated anchor protein involved in autophagy and membrane trafficking
Cluster-29767.55365	1389828804	XP_024979662.1	1460	3.9e-159	protein bem46-like [Cynara cardunculus var. scolymus]	XM_023888593.1	XM_023888593	437	0	PREDICTED: Lactuca sativa protein bem46 (LOC111892541), mRNA	K06889	K06889	uncharacterized protein	http://www.genome.jp/dbget-bin/www_bget?ko:K06889	Q8RXP6	1255	8.7e-137	Alpha/beta hydrolase domain-containing protein WAV2 OS=Arabidopsis thaliana OX=3702 GN=WAV2 PE=2 SV=1	PF01738//PF02129//PF05577//PF00326//PF07859//PF02230	Dienelactone hydrolase family//X-Pro dipeptidyl-peptidase (S15 family)//Serine carboxypeptidase S28//Prolyl oligopeptidase family//alpha/beta hydrolase fold//Phospholipase/Carboxylesterase	GO:0006508	proteolysis	GO:0008236//GO:0016787	serine-type peptidase activity//hydrolase activity	--	--	KOG4391	Predicted alpha/beta hydrolase BEM46
Cluster-29767.93414	--	--	--	--	--	--	--	--	--	--	--	--	--	--	--	--	--	--	--	--	--	--	--	--	--	--	--	--
Cluster-29767.93415	--	--	--	--	--	--	--	--	--	--	--	--	--	--	--	--	--	--	--	--	--	--	--	--	--	--	--	--
Cluster-29767.93416	--	--	--	--	--	XM_015716918.2	XM_015716918	39	8.68e-10	PREDICTED: Ricinus communis pentatricopeptide repeat-containing protein At2g31400, chloroplastic (LOC8267320), transcript variant X2, mRNA	--	--	--	--	--	--	--	--	--	--	--	--	--	--	--	--	--	--
Cluster-27440.0	1387779637	PWA51034.1	197	1.5e-12	RHO guanyl-nucleotide exchange factor 4 [Artemisia annua]	--	--	--	--	--	--	--	--	--	--	--	--	--	PF03141	Putative S-adenosyl-L-methionine-dependent methyltransferase	--	--	GO:0008168	methyltransferase activity	--	--	--	--
Cluster-29767.93410	1387762024	PWA39598.1	2625	8.1e-294	hypothetical protein CTI12_AA570330 [Artemisia annua]	XM_025122224.1	XM_025122224	927	0	PREDICTED: Cynara cardunculus var. scolymus CSC1-like protein HYP1 (LOC112515417), transcript variant X9, mRNA	--	--	--	--	Q8GUH7	1691	6.2e-187	CSC1-like protein HYP1 OS=Arabidopsis thaliana OX=3702 GN=HYP1 PE=2 SV=1	PF02714//PF06422	Calcium-dependent channel, 7TM region, putative phosphate//CDR ABC transporter	GO:0055085//GO:0006810	transmembrane transport//transport	GO:0042626//GO:0005524	ATPase-coupled transmembrane transporter activity//ATP binding	GO:0016020//GO:0016021	membrane//integral component of membrane	--	--
Cluster-29767.93411	--	--	--	--	--	--	--	--	--	--	--	--	--	--	--	--	--	--	--	--	--	--	--	--	--	--	--	--
Cluster-16801.0	--	--	--	--	--	--	--	--	--	--	--	--	--	--	--	--	--	--	--	--	--	--	--	--	--	--	--	--
Cluster-29767.93413	1387833365	PWA96624.1	204	1.3e-13	pentatricopeptide repeat-containing protein [Artemisia annua]	XM_025121763.1	XM_025121763	90	1.06e-37	PREDICTED: Cynara cardunculus var. scolymus pentatricopeptide repeat-containing protein At5g42310, chloroplastic-like (LOC112515106), transcript variant X3, mRNA	--	--	--	--	A0A1D6IEG9	124	9.5e-06	Pentatricopeptide repeat-containing protein CRP1, chloroplastic OS=Zea mays OX=4577 GN=CRP1 PE=1 SV=1	--	--	--	--	--	--	--	--	--	--
Cluster-17663.0	1387801933	PWA68621.1	329	2.2e-28	endopeptidase, NLPC/P60 domain, LRAT-like domain protein [Artemisia annua]	--	--	--	--	--	--	--	--	--	--	--	--	--	--	--	--	--	--	--	--	--	--	--
Cluster-22267.0	--	--	--	--	--	--	--	--	--	--	--	--	--	--	--	--	--	--	--	--	--	--	--	--	--	--	--	--
Cluster-29767.93418	1387768582	PWA43478.1	156	1.1e-07	IQ motif, EF-hand binding site [Artemisia annua]	--	--	--	--	--	K10357	MYO5	myosin V	http://www.genome.jp/dbget-bin/www_bget?ko:K10357	F4IRU3	133	1.9e-06	Myosin-12 OS=Arabidopsis thaliana OX=3702 GN=XI-F PE=2 SV=1	--	--	--	--	--	--	--	--	--	--
Cluster-29767.93419	--	--	--	--	--	--	--	--	--	--	--	--	--	--	--	--	--	--	--	--	--	--	--	--	--	--	--	--
Cluster-28839.0	--	--	--	--	--	--	--	--	--	--	--	--	--	--	--	--	--	--	PF05485	THAP domain	--	--	GO:0003676	nucleic acid binding	--	--	--	--
Cluster-28839.1	1387775189	PWA47885.1	666	6.3e-67	hypothetical protein CTI12_AA496270 [Artemisia annua]	--	--	--	--	--	--	--	--	--	Q99315	172	4.6e-11	Transposon Ty3-G Gag-Pol polyprotein OS=Saccharomyces cerevisiae (strain ATCC 204508 / S288c) OX=559292 GN=TY3B-G PE=1 SV=3	--	--	--	--	--	--	--	--	--	--
Cluster-29767.67156	--	--	--	--	--	XM_022138575.1	XM_022138575	45	6.74e-13	PREDICTED: Helianthus annuus probable carbohydrate esterase At4g34215 (LOC110890931), mRNA	--	--	--	--	--	--	--	--	--	--	--	--	--	--	--	--	--	--
Cluster-10812.0	--	--	--	--	--	--	--	--	--	--	--	--	--	--	--	--	--	--	--	--	--	--	--	--	--	--	--	--
Cluster-543.0	215767496	BAG99724.1	592	5.6e-59	unnamed protein product, partial [Oryza sativa Japonica Group]	XM_015761399.2	XM_015761399	344	2.65e-179	PREDICTED: Oryza sativa Japonica Group tubulin alpha-2 chain-like (LOC4350197), mRNA	K07374	TUBA	tubulin alpha	http://www.genome.jp/dbget-bin/www_bget?ko:K07374	O22347	592	2.1e-60	Tubulin alpha-1 chain OS=Eleusine indica OX=29674 GN=TUBA1 PE=2 SV=1	--	--	--	--	--	--	--	--	--	--
Cluster-14686.0	--	--	--	--	--	--	--	--	--	--	--	--	--	--	--	--	--	--	--	--	--	--	--	--	--	--	--	--
Cluster-29767.102169	--	--	--	--	--	--	--	--	--	--	--	--	--	--	--	--	--	--	PF01080	Presenilin	GO:0016485	protein processing	GO:0004190	aspartic-type endopeptidase activity	GO:0016021	integral component of membrane	--	--
Cluster-2049.0	--	--	--	--	--	XM_018401013.1	XM_018401013	308	2.52e-159	Fusarium oxysporum f. sp. lycopersici 4287 hypothetical protein partial mRNA	--	--	--	--	--	--	--	--	--	--	--	--	--	--	--	--	--	--
Cluster-29767.63921	--	--	--	--	--	--	--	--	--	--	--	--	--	--	--	--	--	--	--	--	--	--	--	--	--	--	--	--
Cluster-16504.0	--	--	--	--	--	--	--	--	--	--	--	--	--	--	--	--	--	--	--	--	--	--	--	--	--	--	--	--
Cluster-16866.0	--	--	--	--	--	--	--	--	--	--	--	--	--	--	--	--	--	--	--	--	--	--	--	--	--	--	--	--
Cluster-5399.0	--	--	--	--	--	--	--	--	--	--	--	--	--	--	--	--	--	--	--	--	--	--	--	--	--	--	--	--
Cluster-29767.18492	1387814407	PWA79363.1	698	3e-70	mitochodrial transcription termination factor [Artemisia annua]	XM_023905076.1	XM_023905076	260	1.5e-131	PREDICTED: Lactuca sativa transcription termination factor MTERF5, chloroplastic-like (LOC111909286), transcript variant X1, mRNA	--	--	--	--	Q9SZL6	140	5.8e-07	Transcription termination factor MTERF6, chloroplastic/mitochondrial OS=Arabidopsis thaliana OX=3702 GN=MTERF6 PE=2 SV=1	PF02536	mTERF	GO:0006355	regulation of transcription, DNA-templated	GO:0003690	double-stranded DNA binding	--	--	--	--
Cluster-29767.54885	1344115836	PPD88996.1	781	5.1e-80	hypothetical protein GOBAR_DD14069 [Gossypium barbadense]	XM_022131710.1	XM_022131710	218	2.36e-108	PREDICTED: Helianthus annuus uncharacterized LOC110884037 (LOC110884037), mRNA	--	--	--	--	Q6Q1P4	194	2.3e-13	Structural maintenance of chromosomes protein 1 OS=Arabidopsis thaliana OX=3702 GN=SMC1 PE=2 SV=2	PF01383	CpcD/allophycocyanin linker domain	--	--	--	--	GO:0030089	phycobilisome	--	--
Cluster-29767.18488	--	--	--	--	--	XM_023872633.1	XM_023872633	48	1.24e-14	PREDICTED: Lactuca sativa 2,3-bisphosphoglycerate-independent phosphoglycerate mutase (LOC111876106), mRNA	--	--	--	--	--	--	--	--	--	--	--	--	--	--	--	--	--	--
Cluster-16485.0	--	--	--	--	--	--	--	--	--	--	--	--	--	--	--	--	--	--	--	--	--	--	--	--	--	--	--	--
Cluster-29767.69379	1387823867	PWA87831.1	609	1e-60	toll/interleukin-1 receptor (TIR) domain-containing protein [Artemisia annua]	XM_025103961.1	XM_025103961	120	1.55e-54	PREDICTED: Cynara cardunculus var. scolymus TMV resistance protein N-like (LOC112500467), mRNA	--	--	--	--	Q40392	372	1.2e-34	TMV resistance protein N OS=Nicotiana glutinosa OX=35889 GN=N PE=1 SV=1	PF01582//PF13676	TIR domain//TIR domain	GO:0007165	signal transduction	GO:0005515	protein binding	--	--	--	--
Cluster-22579.0	--	--	--	--	--	--	--	--	--	--	--	--	--	--	--	--	--	--	--	--	--	--	--	--	--	--	--	--
Cluster-1072.0	--	--	--	--	--	--	--	--	--	--	--	--	--	--	I1WSZ3	136	2.3e-07	Sensor protein IrlS OS=Burkholderia pseudomallei (strain 1026b) OX=884204 GN=irlS PE=3 SV=1	--	--	--	--	--	--	--	--	--	--
Cluster-23213.0	--	--	--	--	--	--	--	--	--	--	--	--	--	--	--	--	--	--	PF07348	Syd protein (SUKH-2)	--	--	--	--	GO:0009898	cytoplasmic side of plasma membrane	--	--
Cluster-13544.0	--	--	--	--	--	--	--	--	--	--	--	--	--	--	--	--	--	--	--	--	--	--	--	--	--	--	--	--
Cluster-29767.18486	1387758156	PWA37702.1	1658	6.5e-182	jmjC domain-containing protein [Artemisia annua]	XM_023907711.1	XM_023907711	76	1.29e-29	PREDICTED: Lactuca sativa lysine-specific demethylase JMJ25-like (LOC111911943), mRNA	K15601	KDM3	lysine-specific demethylase 3	http://www.genome.jp/dbget-bin/www_bget?ko:K15601	Q9SSE9	413	5.8e-39	Lysine-specific demethylase JMJ25 OS=Arabidopsis thaliana OX=3702 GN=JMJ25 PE=1 SV=1	--	--	--	--	--	--	--	--	KOG1356	Putative transcription factor 5qNCA, contains JmjC domain
Cluster-29767.17936	1387821335	PWA85535.1	631	2.7e-63	DNA methyltransferase-2 [Artemisia annua]	--	--	--	--	--	K15336	TRDMT1, DNMT2	tRNA (cytosine38-C5)-methyltransferase	http://www.genome.jp/dbget-bin/www_bget?ko:K15336	F4JWT7	333	3.7e-30	tRNA (cytosine(38)-C(5))-methyltransferase 2 OS=Arabidopsis thaliana OX=3702 GN=DNMT2 PE=1 SV=1	--	--	--	--	--	--	--	--	KOG0919	C-5 cytosine-specific DNA methylase
Cluster-29767.18495	1387825623	PWA89432.1	1321	6.6e-143	Glutaredoxin [Artemisia annua]	--	--	--	--	--	--	--	--	--	Q9LH89	368	8e-34	Uncharacterized protein At3g28850 OS=Arabidopsis thaliana OX=3702 GN=At3g28850 PE=4 SV=1	PF15754//PF05887//PF00462	Sperm equatorial segment protein 1//Procyclic acidic repetitive protein (PARP)//Glutaredoxin	GO:0006118//GO:0045454//GO:0007342//GO:0007340	obsolete electron transport//cell redox homeostasis//fusion of sperm to egg plasma membrane involved in single fertilization//acrosome reaction	GO:0015035//GO:0009055	protein disulfide oxidoreductase activity//electron transfer activity	GO:0001669//GO:0016020	acrosomal vesicle//membrane	--	--
Cluster-4782.0	--	--	--	--	--	--	--	--	--	--	--	--	--	--	--	--	--	--	--	--	--	--	--	--	--	--	--	--
Cluster-29767.17935	1387807501	PWA73343.1	160	1.9e-08	DNA methyltransferase-2 [Artemisia annua]	--	--	--	--	--	K15336	TRDMT1, DNMT2	tRNA (cytosine38-C5)-methyltransferase	http://www.genome.jp/dbget-bin/www_bget?ko:K15336	--	--	--	--	--	--	--	--	--	--	--	--	--	--
Cluster-32488.0	1340423955	XP_023758476.1	137	9.2e-06	G-type lectin S-receptor-like serine/threonine-protein kinase At1g61550 [Lactuca sativa]	--	--	--	--	--	--	--	--	--	--	--	--	--	--	--	--	--	--	--	--	--	--	--
Cluster-29767.18485	1387832839	PWA96126.1	669	9.4e-68	uvrD-like Helicase, ATP-binding domain, P-loop containing nucleoside triphosphate hydrolase [Artemisia annua]	XM_023913803.1	XM_023913803	237	1.17e-119	PREDICTED: Lactuca sativa uncharacterized LOC111918137 (LOC111918137), mRNA	--	--	--	--	Q86AS0	187	2.8e-13	Probable helicase DDB_G0274399 OS=Dictyostelium discoideum OX=44689 GN=DDB_G0274399 PE=3 SV=1	PF08114//PF09061	ATPase proteolipid family//Stirrup	GO:0050790	regulation of catalytic activity	GO:0030234//GO:0016788	enzyme regulator activity//hydrolase activity, acting on ester bonds	--	--	--	--
Cluster-16169.0	--	--	--	--	--	--	--	--	--	--	--	--	--	--	--	--	--	--	--	--	--	--	--	--	--	--	--	--
Cluster-29767.106235	1387763946	PWA40666.1	2066	2.5e-229	BTB/POZ fold [Artemisia annua]	XM_025117909.1	XM_025117909	462	0	PREDICTED: Cynara cardunculus var. scolymus BTB/POZ domain-containing protein At5g60050 (LOC112512103), mRNA	--	--	--	--	Q9LVG9	1075	7.8e-116	BTB/POZ domain-containing protein At5g60050 OS=Arabidopsis thaliana OX=3702 GN=At5g60050 PE=2 SV=1	--	--	--	--	--	--	--	--	--	--
Cluster-4047.0	--	--	--	--	--	--	--	--	--	--	--	--	--	--	--	--	--	--	--	--	--	--	--	--	--	--	--	--
Cluster-30080.0	1387774874	PWA47669.1	404	9.7e-37	hypothetical protein CTI12_AA475510 [Artemisia annua]	--	--	--	--	--	--	--	--	--	--	--	--	--	PF04584	Poxvirus A28 family	GO:0016032	viral process	--	--	GO:0019031	viral envelope	--	--
Cluster-30836.0	1389820003	XP_024974927.1	316	1.1e-26	protein GLUTAMINE DUMPER 2-like [Cynara cardunculus var. scolymus]	--	--	--	--	--	--	--	--	--	Q3EAV6	192	9.8e-14	Protein GLUTAMINE DUMPER 6 OS=Arabidopsis thaliana OX=3702 GN=GDU6 PE=2 SV=1	PF09117	MiAMP1	GO:0006952//GO:0045926	defense response//negative regulation of growth	--	--	--	--	--	--
Cluster-29767.61199	1228884383	XP_021996509.1	1752	8e-193	protein ANTAGONIST OF LIKE HETEROCHROMATIN PROTEIN 1-like [Helianthus annuus]	XM_022140817.1	XM_022140817	426	0	PREDICTED: Helianthus annuus protein ANTAGONIST OF LIKE HETEROCHROMATIN PROTEIN 1-like (LOC110893709), mRNA	--	--	--	--	Q94K49	376	1.1e-34	Protein ANTAGONIST OF LIKE HETEROCHROMATIN PROTEIN 1 OS=Arabidopsis thaliana OX=3702 GN=ALP1 PE=1 SV=1	PF02209	Villin headpiece domain	GO:0007010	cytoskeleton organization	GO:0003779	actin binding	--	--	--	--
Cluster-29767.17932	--	--	--	--	--	--	--	--	--	--	--	--	--	--	--	--	--	--	--	--	--	--	--	--	--	--	--	--
Cluster-29767.26849	1387836709	PWA99805.1	799	2.2e-82	protein kinase-like domain-containing protein [Artemisia annua]	KU253438.1	KU253438	87	8.32e-36	Chrysanthemum indicum clone CiFL-5 LFY-like protein (FL) gene, complete cds	--	--	--	--	Q9FID8	484	2.8e-47	Putative receptor-like protein kinase At5g39000 OS=Arabidopsis thaliana OX=3702 GN=At5g39000 PE=3 SV=1	PF07714//PF00069//PF02939//PF08220	Protein tyrosine and serine/threonine kinase//Protein kinase domain//UcrQ family//DeoR-like helix-turn-helix domain	GO:0006118//GO:0006119//GO:0006355//GO:0006468	obsolete electron transport//oxidative phosphorylation//regulation of transcription, DNA-templated//protein phosphorylation	GO:0004672//GO:0005524//GO:0008121//GO:0003700	protein kinase activity//ATP binding//ubiquinol-cytochrome-c reductase activity//DNA-binding transcription factor activity	GO:0005667	transcription regulator complex	--	--
Cluster-29767.82866	922513512	XP_013592265.1	253	4e-19	PREDICTED: two-component response regulator ARR11-like isoform X1 [Brassica oleracea var. oleracea]	XM_025132461.1	XM_025132461	114	7.03e-51	PREDICTED: Cynara cardunculus var. scolymus two-component response regulator ARR11 (LOC112523033), mRNA	K14491	ARR-B	two-component response regulator ARR-B family	http://www.genome.jp/dbget-bin/www_bget?ko:K14491	Q9FXD6	219	1.3e-16	Two-component response regulator ARR11 OS=Arabidopsis thaliana OX=3702 GN=ARR11 PE=1 SV=1	PF00072//PF12937	Response regulator receiver domain//F-box-like	GO:0000160	phosphorelay signal transduction system	GO:0005515	protein binding	--	--	--	--
Cluster-29767.69371	--	--	--	--	--	--	--	--	--	--	--	--	--	--	--	--	--	--	--	--	--	--	--	--	--	--	--	--
Cluster-29767.61106	--	--	--	--	--	XM_023886034.1	XM_023886034	75	1.01e-29	PREDICTED: Lactuca sativa ranBP2-type zinc finger protein At1g67325-like (LOC111889878), mRNA	--	--	--	--	--	--	--	--	--	--	--	--	--	--	--	--	--	--
Cluster-29767.17930	1387767700	PWA42913.1	456	8.2e-43	hypothetical protein CTI12_AA535250 [Artemisia annua]	XM_025114022.1	XM_025114022	163	2.88e-78	PREDICTED: Cynara cardunculus var. scolymus probable magnesium transporter NIPA1 (LOC112509161), mRNA	--	--	--	--	Q9LNK7	291	4.2e-25	Probable magnesium transporter NIPA3 OS=Arabidopsis thaliana OX=3702 GN=At1g34470 PE=2 SV=1	PF05653	Magnesium transporter NIPA	GO:0015693	magnesium ion transport	GO:0015095	magnesium ion transmembrane transporter activity	GO:0016021	integral component of membrane	KOG2922	Uncharacterized conserved protein
Cluster-12492.0	--	--	--	--	--	--	--	--	--	--	--	--	--	--	--	--	--	--	--	--	--	--	--	--	--	--	--	--
Cluster-29767.37195	--	--	--	--	--	--	--	--	--	--	--	--	--	--	--	--	--	--	--	--	--	--	--	--	--	--	--	--
Cluster-30002.0	--	--	--	--	--	--	--	--	--	--	--	--	--	--	--	--	--	--	--	--	--	--	--	--	--	--	--	--
Cluster-29767.37194	--	--	--	--	--	--	--	--	--	--	--	--	--	--	--	--	--	--	--	--	--	--	--	--	--	--	--	--
Cluster-10067.0	--	--	--	--	--	--	--	--	--	--	--	--	--	--	--	--	--	--	PF01736	Polyomavirus agnoprotein	--	--	GO:0003677	DNA binding	--	--	--	--
Cluster-9166.0	--	--	--	--	--	--	--	--	--	--	--	--	--	--	--	--	--	--	--	--	--	--	--	--	--	--	--	--
Cluster-28798.0	--	--	--	--	--	--	--	--	--	--	--	--	--	--	--	--	--	--	--	--	--	--	--	--	--	--	--	--
Cluster-25090.0	1191677107	OTG29071.1	578	8e-57	putative glutathione S-transferase [Helianthus annuus]	--	--	--	--	--	K00799	GST, gst	glutathione S-transferase	http://www.genome.jp/dbget-bin/www_bget?ko:K00799	P46423	510	2.3e-50	Glutathione S-transferase OS=Hyoscyamus muticus OX=35626 PE=1 SV=1	PF02798//PF13417//PF13409	Glutathione S-transferase, N-terminal domain//Glutathione S-transferase, N-terminal domain//Glutathione S-transferase, N-terminal domain	--	--	GO:0005515	protein binding	--	--	--	--
Cluster-29767.46730	1389773112	XP_024988205.1	2493	1.3e-278	conserved oligomeric Golgi complex subunit 4 [Cynara cardunculus var. scolymus]	XM_022161153.1	XM_022161153	974	0	PREDICTED: Helianthus annuus conserved oligomeric Golgi complex subunit 4 (LOC110916405), mRNA	--	--	--	--	Q8L838	2199	5.9e-246	Conserved oligomeric Golgi complex subunit 4 OS=Arabidopsis thaliana OX=3702 GN=COG4 PE=1 SV=1	PF04437//PF07393	RINT-1 / TIP-1 family//Exocyst complex component Sec10	GO:0048193//GO:0006887	Golgi vesicle transport//exocytosis	--	--	GO:0005783//GO:0005737	endoplasmic reticulum//cytoplasm	KOG0412	Golgi transport complex COD1 protein
Cluster-1390.0	255604344	XP_002538205.1	411	5.9e-38	uncharacterized protein LOC8278324, partial [Ricinus communis]	--	--	--	--	--	--	--	--	--	P44953	316	2.3e-28	Coenzyme A biosynthesis bifunctional protein CoaBC OS=Haemophilus influenzae (strain ATCC 51907 / DSM 11121 / KW20 / Rd) OX=71421 GN=coaBC PE=3 SV=1	PF02441	Flavoprotein	--	--	GO:0003824	catalytic activity	--	--	--	--
Cluster-29767.58987	1389798586	XP_024959255.1	851	1.1e-88	BRASSINOSTEROID INSENSITIVE 1-associated receptor kinase 1-like isoform X2 [Cynara cardunculus var. scolymus]	XM_023894884.1	XM_023894884	383	0	PREDICTED: Lactuca sativa BRASSINOSTEROID INSENSITIVE 1-associated receptor kinase 1-like (LOC111899010), mRNA	K13416	BAK1	brassinosteroid insensitive 1-associated receptor kinase 1	http://www.genome.jp/dbget-bin/www_bget?ko:K13416	Q94F62	793	2.1e-83	BRASSINOSTEROID INSENSITIVE 1-associated receptor kinase 1 OS=Arabidopsis thaliana OX=3702 GN=BAK1 PE=1 SV=2	PF00069//PF07714	Protein kinase domain//Protein tyrosine and serine/threonine kinase	GO:0006468	protein phosphorylation	GO:0005524//GO:0004672	ATP binding//protein kinase activity	--	--	--	--
Cluster-20639.0	--	--	--	--	--	--	--	--	--	--	--	--	--	--	--	--	--	--	--	--	--	--	--	--	--	--	--	--
Cluster-7679.0	--	--	--	--	--	--	--	--	--	--	--	--	--	--	--	--	--	--	--	--	--	--	--	--	--	--	--	--
Cluster-29767.67529	--	--	--	--	--	--	--	--	--	--	--	--	--	--	--	--	--	--	--	--	--	--	--	--	--	--	--	--
Cluster-29767.21700	--	--	--	--	--	KP332384.1	KP332384	238	3.85e-120	Chrysanthemum x morifolium microsatellite JH-544 sequence	--	--	--	--	--	--	--	--	--	--	--	--	--	--	--	--	--	--
Cluster-29767.67527	1387788221	PWA57466.1	1030	4.4e-109	hypothetical protein CTI12_AA407280 [Artemisia annua]	XM_022154921.1	XM_022154921	181	5.59e-88	PREDICTED: Helianthus annuus calmodulin-binding protein 60 B-like (LOC110910227), mRNA	--	--	--	--	Q0WVV6	311	3.9e-27	Calmodulin-binding protein 60 D OS=Arabidopsis thaliana OX=3702 GN=CBP60D PE=2 SV=1	PF15666//PF07887	Germinal center-associated lymphoma//Calmodulin binding protein-like	GO:0050855//GO:2000401	regulation of B cell receptor signaling pathway//regulation of lymphocyte migration	GO:0005516	calmodulin binding	--	--	--	--
Cluster-29767.67526	--	--	--	--	--	--	--	--	--	--	--	--	--	--	--	--	--	--	--	--	--	--	--	--	--	--	--	--
Cluster-29767.67525	--	--	--	--	--	--	--	--	--	--	--	--	--	--	--	--	--	--	--	--	--	--	--	--	--	--	--	--
Cluster-29767.67524	--	--	--	--	--	--	--	--	--	--	--	--	--	--	--	--	--	--	--	--	--	--	--	--	--	--	--	--
Cluster-29767.67523	--	--	--	--	--	--	--	--	--	--	--	--	--	--	--	--	--	--	--	--	--	--	--	--	--	--	--	--
Cluster-29767.21703	--	--	--	--	--	--	--	--	--	--	--	--	--	--	--	--	--	--	--	--	--	--	--	--	--	--	--	--
Cluster-29767.67521	1387821128	PWA85351.1	685	3.3e-69	protein kinase superfamily protein [Artemisia annua]	XM_017379445.1	XM_017379445	140	2.53e-65	PREDICTED: Daucus carota subsp. sativus serine/threonine-protein kinase CDL1-like (LOC108208866), mRNA	--	--	--	--	Q9LQQ8	568	4.6e-57	Probable serine/threonine-protein kinase PBL5 OS=Arabidopsis thaliana OX=3702 GN=PBL5 PE=2 SV=1	PF00069//PF07714	Protein kinase domain//Protein tyrosine and serine/threonine kinase	GO:0006468	protein phosphorylation	GO:0004672//GO:0005524	protein kinase activity//ATP binding	--	--	--	--
Cluster-29767.67520	1387823272	PWA87291.1	1497	2.8e-163	transducin/WD40 repeat-like superfamily protein [Artemisia annua]	XM_028228180.1	XM_028228180	255	3.67e-129	PREDICTED: Camellia sinensis WD repeat-containing protein 44-like (LOC114285165), mRNA	K20241	WDR44, RAB11BP	WD repeat-containing protein 44	http://www.genome.jp/dbget-bin/www_bget?ko:K20241	Q6NVE8	181	4.2e-12	WD repeat-containing protein 44 OS=Mus musculus OX=10090 GN=Wdr44 PE=1 SV=1	PF00400	WD domain, G-beta repeat	--	--	GO:0005515	protein binding	--	--	KOG0283	WD40 repeat-containing protein
Cluster-29767.82140	1387778403	PWA50147.1	318	1.6e-26	CHASE-like protein [Artemisia annua]	XM_022133213.1	XM_022133213	66	4.65e-24	PREDICTED: Helianthus annuus thylakoid ADP,ATP carrier protein, chloroplastic-like (LOC110885513), transcript variant X2, mRNA	K00924	-	E2.7.1.-	http://www.genome.jp/dbget-bin/www_bget?ko:K00924	P43298	238	1.1e-18	Receptor protein kinase TMK1 OS=Arabidopsis thaliana OX=3702 GN=TMK1 PE=1 SV=1	PF00612	IQ calmodulin-binding motif	--	--	GO:0005515	protein binding	--	--	--	--
Cluster-29767.82141	--	--	--	--	--	XM_025126202.1	XM_025126202	38	8.72e-09	PREDICTED: Cynara cardunculus var. scolymus probable envelope ADP,ATP carrier protein, chloroplastic (LOC112518492), mRNA	--	--	--	--	--	--	--	--	--	--	--	--	--	--	--	--	--	--
Cluster-11026.0	1387785290	PWA55206.1	247	7.1e-19	RNA-directed DNA polymerase, eukaryota, Reverse transcriptase zinc-binding domain protein [Artemisia annua]	--	--	--	--	--	--	--	--	--	--	--	--	--	--	--	--	--	--	--	--	--	--	--
Cluster-29767.65104	1387808355	PWA74071.1	600	1.3e-59	ribosomal protein L29 [Artemisia annua]	XM_022125801.1	XM_022125801	236	6.06e-119	PREDICTED: Helianthus annuus 60S ribosomal protein L35-2-like (LOC110877637), mRNA	K02918	RP-L35e, RPL35	large subunit ribosomal protein L35e	http://www.genome.jp/dbget-bin/www_bget?ko:K02918	Q9M5L0	530	6.6e-53	60S ribosomal protein L35 OS=Euphorbia esula OX=3993 GN=RPL35 PE=2 SV=1	PF00831	Ribosomal L29 protein	GO:0006412//GO:0042254	translation//ribosome biogenesis	GO:0003735	structural constituent of ribosome	GO:0005840	ribosome	KOG3436	60S ribosomal protein L35
Cluster-29767.82144	1600622073	TEY12224.1	157	5.9e-08	large subunit ribosomal protein L8e [Salvia splendens]	XM_015200428.2	XM_015200428	63	1.74e-22	PREDICTED: Solanum pennellii 60S ribosomal protein L8 (LOC107002411), mRNA	K02938	RP-L8e, RPL8	large subunit ribosomal protein L8e	http://www.genome.jp/dbget-bin/www_bget?ko:K02938	P29766	143	9.4e-08	60S ribosomal protein L8 OS=Solanum lycopersicum OX=4081 GN=RPL8 PE=2 SV=1	--	--	--	--	--	--	--	--	--	--
Cluster-29767.82145	--	--	--	--	--	--	--	--	--	--	--	--	--	--	--	--	--	--	PF04882	Peroxin-3	GO:0007031	peroxisome organization	--	--	GO:0005779	integral component of peroxisomal membrane	--	--
Cluster-29767.82146	--	--	--	--	--	--	--	--	--	--	--	--	--	--	--	--	--	--	--	--	--	--	--	--	--	--	--	--
Cluster-29767.82147	--	--	--	--	--	--	--	--	--	--	--	--	--	--	--	--	--	--	--	--	--	--	--	--	--	--	--	--
Cluster-29767.82148	1387790263	PWA59080.1	1849	5.1e-204	apoptotic protease-activating factor 1 [Artemisia annua]	XM_023872892.1	XM_023872892	638	0	PREDICTED: Lactuca sativa LEC14B homolog (LOC111876380), mRNA	K11801	WDR23	WD repeat-containing protein 23	http://www.genome.jp/dbget-bin/www_bget?ko:K11801	O24467	1245	2.1e-135	LEC14B homolog OS=Prunus armeniaca OX=36596 PE=2 SV=1	PF00400	WD domain, G-beta repeat	--	--	GO:0005515	protein binding	--	--	KOG0266	WD40 repeat-containing protein
Cluster-29767.82149	1387790263	PWA59080.1	433	3.9e-40	apoptotic protease-activating factor 1 [Artemisia annua]	XM_022172401.1	XM_022172401	121	6.48e-55	PREDICTED: Helianthus annuus LEC14B homolog (LOC110929268), mRNA	K11801	WDR23	WD repeat-containing protein 23	http://www.genome.jp/dbget-bin/www_bget?ko:K11801	Q40153	305	1e-26	LEC14B protein OS=Lithospermum erythrorhizon OX=34254 PE=2 SV=1	PF00400	WD domain, G-beta repeat	--	--	GO:0005515	protein binding	--	--	KOG0266	WD40 repeat-containing protein
Cluster-29767.71819	--	--	--	--	--	--	--	--	--	--	--	--	--	--	--	--	--	--	--	--	--	--	--	--	--	--	--	--
Cluster-29767.65102	1387772000	PWA45714.1	620	1.5e-61	Frigida-like protein [Artemisia annua]	XM_023898010.1	XM_023898010	100	5.85e-43	PREDICTED: Lactuca sativa FRIGIDA-like protein 4a (LOC111902147), mRNA	--	--	--	--	Q940H8	325	9.2e-29	FRIGIDA-like protein 4b OS=Arabidopsis thaliana OX=3702 GN=FRL4B PE=1 SV=1	PF02617	ATP-dependent Clp protease adaptor protein ClpS	GO:0030163	protein catabolic process	--	--	--	--	--	--
Cluster-16705.0	1387831369	PWA94747.1	346	2.5e-30	RNA-directed DNA polymerase, eukaryota [Artemisia annua]	--	--	--	--	--	--	--	--	--	--	--	--	--	--	--	--	--	--	--	--	--	--	--
Cluster-29767.65101	1387831894	PWA95241.1	813	8.5e-84	rho GTPase activation protein, PH domain-like, Ternary complex factor MIP1, leucine-zipper [Artemisia annua]	XM_025121313.1	XM_025121313	379	0	PREDICTED: Cynara cardunculus var. scolymus rho GTPase-activating protein REN1-like (LOC112514714), mRNA	--	--	--	--	F4JQZ3	266	8.6e-22	Rho GTPase-activating protein REN1 OS=Arabidopsis thaliana OX=3702 GN=REN1 PE=1 SV=2	PF02724//PF09726//PF00620	CDC45-like protein//Macoilin family//RhoGAP domain	GO:0006270//GO:0007165//GO:0023041	DNA replication initiation//signal transduction//neuronal signal transduction	--	--	GO:0030867	rough endoplasmic reticulum membrane	--	--
Cluster-29767.15725	--	--	--	--	--	--	--	--	--	--	--	--	--	--	--	--	--	--	--	--	--	--	--	--	--	--	--	--
Cluster-29767.21706	--	--	--	--	--	--	--	--	--	--	--	--	--	--	--	--	--	--	--	--	--	--	--	--	--	--	--	--
Cluster-5543.0	--	--	--	--	--	--	--	--	--	--	--	--	--	--	--	--	--	--	--	--	--	--	--	--	--	--	--	--
Cluster-29767.90334	--	--	--	--	--	--	--	--	--	--	--	--	--	--	--	--	--	--	--	--	--	--	--	--	--	--	--	--
Cluster-29767.90335	--	--	--	--	--	--	--	--	--	--	--	--	--	--	--	--	--	--	--	--	--	--	--	--	--	--	--	--
Cluster-29767.90336	--	--	--	--	--	XM_025121231.1	XM_025121231	56	2.35e-18	PREDICTED: Cynara cardunculus var. scolymus serine/threonine-protein phosphatase PP-X isozyme 2 (LOC112514646), transcript variant X2, mRNA	--	--	--	--	Q9Y0B7	128	8.9e-06	Serine/threonine-protein phosphatase 4 catalytic subunit OS=Dictyostelium discoideum OX=44689 GN=ppp4c PE=1 SV=1	--	--	--	--	--	--	--	--	--	--
Cluster-29767.90337	--	--	--	--	--	KP332555.1	KP332555	142	1.04e-66	Chrysanthemum x morifolium microsatellite JH-715 sequence	--	--	--	--	--	--	--	--	--	--	--	--	--	--	--	--	--	--
Cluster-29767.113371	1387783576	PWA53921.1	418	1.6e-38	lung seven transmembrane receptor family protein [Artemisia annua]	XM_025124901.1	XM_025124901	167	1.29e-80	PREDICTED: Cynara cardunculus var. scolymus transmembrane protein 87A (LOC112517462), mRNA	--	--	--	--	--	--	--	--	PF06814	Lung seven transmembrane receptor	--	--	--	--	GO:0016021	integral component of membrane	--	--
Cluster-29767.113370	--	--	--	--	--	--	--	--	--	--	--	--	--	--	--	--	--	--	--	--	--	--	--	--	--	--	--	--
Cluster-29767.113373	--	--	--	--	--	--	--	--	--	--	--	--	--	--	--	--	--	--	--	--	--	--	--	--	--	--	--	--
Cluster-29767.113372	--	--	--	--	--	--	--	--	--	--	--	--	--	--	--	--	--	--	--	--	--	--	--	--	--	--	--	--
Cluster-29767.113379	--	--	--	--	--	--	--	--	--	--	--	--	--	--	--	--	--	--	PF04834	Early E3 14.5 kDa protein	GO:0009966	regulation of signal transduction	--	--	GO:0016021	integral component of membrane	--	--
Cluster-29767.113378	--	--	--	--	--	--	--	--	--	--	--	--	--	--	--	--	--	--	--	--	--	--	--	--	--	--	--	--
Cluster-9585.0	--	--	--	--	--	--	--	--	--	--	--	--	--	--	--	--	--	--	--	--	--	--	--	--	--	--	--	--
Cluster-29767.28673	--	--	--	--	--	KP333890.1	KP333890	51	2.15e-16	Chrysanthemum x morifolium microsatellite JH-2061 sequence	--	--	--	--	--	--	--	--	--	--	--	--	--	--	--	--	--	--
Cluster-32270.0	--	--	--	--	--	--	--	--	--	--	--	--	--	--	--	--	--	--	--	--	--	--	--	--	--	--	--	--
Cluster-29767.28671	1387831500	PWA94872.1	243	2.3e-18	zinc finger, RING/FYVE/PHD-type [Artemisia annua]	--	--	--	--	--	--	--	--	--	--	--	--	--	PF00957//PF06320//PF07851//PF06005	Synaptobrevin//GCN5-like protein 1 (GCN5L1)//TMPIT-like protein//Cell division protein ZapB	GO:0016192//GO:0090529//GO:0043093	vesicle-mediated transport//cell septum assembly//FtsZ-dependent cytokinesis	--	--	GO:0005737//GO:0031083//GO:0016021	cytoplasm//BLOC-1 complex//integral component of membrane	--	--
Cluster-29767.28676	--	--	--	--	--	--	--	--	--	--	--	--	--	--	--	--	--	--	--	--	--	--	--	--	--	--	--	--
Cluster-29767.28677	--	--	--	--	--	--	--	--	--	--	--	--	--	--	--	--	--	--	--	--	--	--	--	--	--	--	--	--
Cluster-29767.28674	1389811310	XP_024970270.1	450	2.6e-42	G-type lectin S-receptor-like serine/threonine-protein kinase At4g27290 isoform X2 [Cynara cardunculus var. scolymus]	--	--	--	--	--	--	--	--	--	O81832	325	3.1e-29	G-type lectin S-receptor-like serine/threonine-protein kinase At4g27290 OS=Arabidopsis thaliana OX=3702 GN=At4g27290 PE=3 SV=4	PF00954	S-locus glycoprotein domain	GO:0048544	recognition of pollen	--	--	--	--	--	--
Cluster-29767.28675	--	--	--	--	--	--	--	--	--	--	--	--	--	--	--	--	--	--	--	--	--	--	--	--	--	--	--	--
Cluster-8110.0	--	--	--	--	--	--	--	--	--	--	--	--	--	--	--	--	--	--	--	--	--	--	--	--	--	--	--	--
Cluster-29767.28678	--	--	--	--	--	--	--	--	--	--	--	--	--	--	--	--	--	--	--	--	--	--	--	--	--	--	--	--
Cluster-29767.67003	1387808140	PWA73890.1	213	4.5e-15	LL-diaminopimelate aminotransferase, chloroplastic [Artemisia annua]	--	--	--	--	--	--	--	--	--	--	--	--	--	--	--	--	--	--	--	--	--	--	--
Cluster-3461.0	1344013182	XP_023889219.1	396	4.5e-36	saccharopine dehydrogenase [NADP(+), L-glutamate-forming]-like [Quercus suber]	XM_018377263.1	XM_018377263	514	0	Fusarium oxysporum f. sp. lycopersici 4287 saccharopine dehydrogenase [NADP+, L-glutamate-forming] mRNA	K14157	AASS	alpha-aminoadipic semialdehyde synthase	http://www.genome.jp/dbget-bin/www_bget?ko:K14157	Q9P4R4	467	1e-45	Saccharopine dehydrogenase [NADP(+), L-glutamate-forming] OS=Magnaporthe oryzae (strain 70-15 / ATCC MYA-4617 / FGSC 8958) OX=242507 GN=LYS3 PE=1 SV=2	--	--	--	--	--	--	--	--	KOG0172	Lysine-ketoglutarate reductase/saccharopine dehydrogenase
Cluster-22867.0	1387805031	PWA71235.1	353	3.9e-31	Peptidase C48, SUMO/Sentrin/Ubl1 [Artemisia annua]	--	--	--	--	--	K16287	ULP1C_D	ubiquitin-like-specific protease 1C/D	http://www.genome.jp/dbget-bin/www_bget?ko:K16287	--	--	--	--	PF15328	Putative GRINL1B complex locus protein 2	--	--	--	--	GO:0016591	RNA polymerase II, holoenzyme	--	--
Cluster-12500.0	--	--	--	--	--	--	--	--	--	--	--	--	--	--	--	--	--	--	--	--	--	--	--	--	--	--	--	--
Cluster-4161.0	1379596805	XP_024629830.1	140	1.8e-06	uncharacterized protein LOC112417892 [Medicago truncatula]	--	--	--	--	--	--	--	--	--	--	--	--	--	--	--	--	--	--	--	--	--	--	--
Cluster-23009.0	--	--	--	--	--	--	--	--	--	--	--	--	--	--	--	--	--	--	--	--	--	--	--	--	--	--	--	--
Cluster-29767.62031	--	--	--	--	--	--	--	--	--	--	--	--	--	--	--	--	--	--	--	--	--	--	--	--	--	--	--	--
Cluster-29767.73520	1387813897	PWA78913.1	1571	8.1e-172	hypothetical protein CTI12_AA211600 [Artemisia annua]	--	--	--	--	--	--	--	--	--	--	--	--	--	PF00060	Ligand-gated ion channel	GO:0006811	ion transport	GO:0015276	ligand-gated ion channel activity	GO:0016020	membrane	--	--
Cluster-29767.39218	1389797556	XP_024958712.1	2236	8.9e-249	pumilio homolog 24 [Cynara cardunculus var. scolymus]	XM_025102944.1	XM_025102944	881	0	PREDICTED: Cynara cardunculus var. scolymus pumilio homolog 24 (LOC112499633), mRNA	K14844	PUF6	pumilio homology domain family member 6	http://www.genome.jp/dbget-bin/www_bget?ko:K14844	Q9LRZ3	1638	7.4e-181	Pumilio homolog 24 OS=Arabidopsis thaliana OX=3702 GN=APUM24 PE=1 SV=1	PF08144//PF00806	CPL (NUC119) domain//Pumilio-family RNA binding repeat	--	--	GO:0003723	RNA binding	--	--	KOG2050	Puf family RNA-binding protein
Cluster-29767.39219	--	--	--	--	--	--	--	--	--	--	--	--	--	--	--	--	--	--	--	--	--	--	--	--	--	--	--	--
Cluster-29767.39216	1387763437	PWA40370.1	1971	2.7e-218	Armadillo [Artemisia annua]	XM_025132546.1	XM_025132546	813	0	PREDICTED: Cynara cardunculus var. scolymus kinesin-like protein KIN-UA (LOC112523102), mRNA	--	--	--	--	Q5VQ09	1580	2.2e-174	Kinesin-like protein KIN-UB OS=Oryza sativa subsp. japonica OX=39947 GN=KINUB PE=2 SV=1	PF00225//PF16796//PF05970	Kinesin motor domain//Microtubule binding//PIF1-like helicase	GO:0007017//GO:0006281//GO:0000723//GO:0007018	microtubule-based process//DNA repair//telomere maintenance//microtubule-based movement	GO:0005524//GO:0003777//GO:0008017//GO:0003678	ATP binding//microtubule motor activity//microtubule binding//DNA helicase activity	GO:0005657//GO:0005874//GO:0045298	replication fork//microtubule//tubulin complex	KOG0240	Kinesin (SMY1 subfamily)
Cluster-29767.39217	1387760526	PWA38839.1	216	2.8e-15	zinc finger, RING-CH-type, Zinc finger, RING/FYVE/PHD-type [Artemisia annua]	XM_017400647.1	XM_017400647	76	3.2e-30	PREDICTED: Daucus carota subsp. sativus probable E3 ubiquitin ligase SUD1 (LOC108225715), transcript variant X2, mRNA	K10661	MARCH6, DOA10	E3 ubiquitin-protein ligase MARCH6	http://www.genome.jp/dbget-bin/www_bget?ko:K10661	F4JKK0	193	4.9e-14	Probable E3 ubiquitin ligase SUD1 OS=Arabidopsis thaliana OX=3702 GN=SUD1 PE=1 SV=1	--	--	--	--	--	--	--	--	KOG1609	Protein involved in mRNA turnover and stability
Cluster-29767.39214	1387800397	PWA67339.1	919	4.5e-96	MATE efflux family protein [Artemisia annua]	XM_023901719.1	XM_023901719	409	0	PREDICTED: Lactuca sativa protein DETOXIFICATION 24-like (LOC111905985), mRNA	--	--	--	--	F4J158	518	5.3e-51	Protein DETOXIFICATION 24 OS=Arabidopsis thaliana OX=3702 GN=DTX24 PE=2 SV=1	PF02687//PF01554	FtsX-like permease family//MatE	GO:0006810//GO:0055085	transport//transmembrane transport	GO:0042910//GO:0015297	xenobiotic transmembrane transporter activity//antiporter activity	GO:0016020	membrane	--	--
Cluster-29767.39215	1387792218	PWA60618.1	1269	9e-137	Multi antimicrobial extrusion protein [Artemisia annua]	XM_022144792.1	XM_022144792	512	0	PREDICTED: Helianthus annuus protein DETOXIFICATION 24-like (LOC110898053), transcript variant X2, mRNA	--	--	--	--	F4J158	790	1.2e-82	Protein DETOXIFICATION 24 OS=Arabidopsis thaliana OX=3702 GN=DTX24 PE=2 SV=1	PF08657//PF01554	DASH complex subunit Spc34//MatE	GO:0008608//GO:0006810//GO:0055085	attachment of spindle microtubules to kinetochore//transport//transmembrane transport	GO:0042910//GO:0015297	xenobiotic transmembrane transporter activity//antiporter activity	GO:0005876//GO:0016020//GO:0042729	spindle microtubule//membrane//DASH complex	--	--
Cluster-29767.39212	--	--	--	--	--	KP332440.1	KP332440	113	8.49e-51	Chrysanthemum x morifolium microsatellite JH-600 sequence	--	--	--	--	--	--	--	--	--	--	--	--	--	--	--	--	--	--
Cluster-29767.39213	1387825356	PWA89188.1	293	6.7e-24	peroxidase superfamily protein [Artemisia annua]	KP332440.1	KP332440	140	1.8e-65	Chrysanthemum x morifolium microsatellite JH-600 sequence	K00430	E1.11.1.7	peroxidase	http://www.genome.jp/dbget-bin/www_bget?ko:K00430	Q9LE15	207	2.4e-15	Peroxidase 4 OS=Arabidopsis thaliana OX=3702 GN=PER4 PE=3 SV=1	PF00141	Peroxidase	GO:0055114//GO:0006979//GO:0006804	oxidation-reduction process//response to oxidative stress//obsolete peroxidase reaction	GO:0020037//GO:0004601	heme binding//peroxidase activity	--	--	--	--
Cluster-29767.39210	1387761792	PWA39486.1	919	2.5e-96	heme peroxidase [Artemisia annua]	XM_025132294.1	XM_025132294	242	5.22e-122	PREDICTED: Cynara cardunculus var. scolymus lignin-forming anionic peroxidase-like (LOC112522938), mRNA	K00430	E1.11.1.7	peroxidase	http://www.genome.jp/dbget-bin/www_bget?ko:K00430	Q02200	628	5.2e-64	Lignin-forming anionic peroxidase OS=Nicotiana sylvestris OX=4096 PE=2 SV=1	PF01044//PF00141	Vinculin family//Peroxidase	GO:0006979//GO:0007155//GO:0055114//GO:0006804	response to oxidative stress//cell adhesion//oxidation-reduction process//obsolete peroxidase reaction	GO:0051015//GO:0020037//GO:0004601	actin filament binding//heme binding//peroxidase activity	--	--	--	--
Cluster-29767.62037	1322385572	PLY79450.1	153	3.1e-07	hypothetical protein LSAT_9X73420 [Lactuca sativa]	--	--	--	--	--	K17302	COPB2, SEC27	coatomer subunit beta'	http://www.genome.jp/dbget-bin/www_bget?ko:K17302	--	--	--	--	--	--	--	--	--	--	--	--	--	--
Cluster-3155.0	1343973733	XP_023870994.1	657	2.9e-66	uncharacterized protein LOC111983563 [Quercus suber]	XM_018382318.1	XM_018382318	594	0	Fusarium oxysporum f. sp. lycopersici 4287 glutathione S-transferase mRNA	K00799	GST, gst	glutathione S-transferase	http://www.genome.jp/dbget-bin/www_bget?ko:K00799	Q46845	345	1.7e-31	Disulfide-bond oxidoreductase YghU OS=Escherichia coli (strain K12) OX=83333 GN=yghU PE=1 SV=2	PF04661//PF02798//PF13409//PF13417	Poxvirus I3 ssDNA-binding protein//Glutathione S-transferase, N-terminal domain//Glutathione S-transferase, N-terminal domain//Glutathione S-transferase, N-terminal domain	--	--	GO:0005515//GO:0003697	protein binding//single-stranded DNA binding	--	--	KOG0867	Glutathione S-transferase
Cluster-29767.62034	--	--	--	--	--	--	--	--	--	--	--	--	--	--	--	--	--	--	--	--	--	--	--	--	--	--	--	--
Cluster-26046.0	1387809540	PWA75092.1	369	5.2e-33	Cupin 1 [Artemisia annua]	XM_025109758.1	XM_025109758	83	4.29e-34	PREDICTED: Cynara cardunculus var. scolymus germin-like protein 9-3 (LOC112505775), mRNA	--	--	--	--	Q652Q0	135	2.7e-07	Putative germin-like protein 9-2 OS=Oryza sativa subsp. japonica OX=39947 GN=Os09g0568600 PE=3 SV=1	--	--	--	--	--	--	--	--	--	--
Cluster-10828.0	--	--	--	--	--	--	--	--	--	--	--	--	--	--	--	--	--	--	--	--	--	--	--	--	--	--	--	--
Cluster-28234.0	1387811615	PWA76910.1	2289	6.2e-255	PAS domain-containing protein tyrosine kinase family protein [Artemisia annua]	XM_023150426.1	XM_023150426	176	4.66e-85	PREDICTED: Cucurbita maxima serine/threonine-protein kinase pakF-like (LOC111499001), transcript variant X3, mRNA	--	--	--	--	Q9C9U5	509	6e-50	Probable serine/threonine-protein kinase SIS8 OS=Arabidopsis thaliana OX=3702 GN=SIS8 PE=1 SV=1	PF08447//PF07714//PF00069//PF00989	PAS fold//Protein tyrosine and serine/threonine kinase//Protein kinase domain//PAS fold	GO:0006468//GO:0006355	protein phosphorylation//regulation of transcription, DNA-templated	GO:0005524//GO:0004672//GO:0005515	ATP binding//protein kinase activity//protein binding	--	--	--	--
Cluster-29767.32965	--	--	--	--	--	--	--	--	--	--	--	--	--	--	--	--	--	--	--	--	--	--	--	--	--	--	--	--
Cluster-9247.0	--	--	--	--	--	--	--	--	--	--	--	--	--	--	--	--	--	--	--	--	--	--	--	--	--	--	--	--
Cluster-36.0	--	--	--	--	--	XM_018377921.1	XM_018377921	402	0	Fusarium oxysporum f. sp. lycopersici 4287 malate dehydrogenase (oxaloacetate-decarboxylating) mRNA	--	--	--	--	P36013	151	4.6e-09	NAD-dependent malic enzyme, mitochondrial OS=Saccharomyces cerevisiae (strain ATCC 204508 / S288c) OX=559292 GN=MAE1 PE=1 SV=1	PF03949	Malic enzyme, NAD binding domain	--	--	GO:0051287	NAD binding	--	--	--	--
Cluster-5397.0	133723098	ABO37801.1	361	3.5e-32	ubiquitin activating enzyme-like protein, partial [Pisum sativum]	CP034456.1	CP034456	60	2.02e-21	Metschnikowia aff. pulcherrima strain APC 1.2 chromosome I, complete sequence	K03178	UBE1, UBA1	ubiquitin-activating enzyme E1	http://www.genome.jp/dbget-bin/www_bget?ko:K03178	P52495	349	3.3e-32	Ubiquitin-activating enzyme E1 1 OS=Candida albicans (strain WO-1) OX=294748 GN=UBA1 PE=3 SV=2	PF00562	RNA polymerase Rpb2, domain 6	GO:0006206//GO:0006144//GO:0006351	pyrimidine nucleobase metabolic process//purine nucleobase metabolic process//transcription, DNA-templated	GO:0003677//GO:0003899	DNA binding//DNA-directed 5'-3' RNA polymerase activity	GO:0005730	nucleolus	KOG2012	Ubiquitin activating enzyme UBA1
Cluster-14239.1	--	--	--	--	--	--	--	--	--	--	--	--	--	--	--	--	--	--	--	--	--	--	--	--	--	--	--	--
Cluster-14239.0	--	--	--	--	--	--	--	--	--	--	--	--	--	--	--	--	--	--	--	--	--	--	--	--	--	--	--	--
Cluster-29767.62038	1389797635	XP_024958753.1	1214	1.5e-130	putative RING-H2 finger protein ATL21A isoform X1 [Cynara cardunculus var. scolymus]	--	--	--	--	--	--	--	--	--	Q9SKK8	476	2.2e-46	RING-H2 finger protein ATL22 OS=Arabidopsis thaliana OX=3702 GN=ATL22 PE=2 SV=2	PF00097//PF12861//PF13947//PF12906//PF12678	Zinc finger, C3HC4 type (RING finger)//Anaphase-promoting complex subunit 11 RING-H2 finger//Wall-associated receptor kinase galacturonan-binding//RING-variant domain//RING-H2 zinc finger domain	GO:0016567	protein ubiquitination	GO:0046872//GO:0004842//GO:0030247//GO:0008270	metal ion binding//ubiquitin-protein transferase activity//polysaccharide binding//zinc ion binding	GO:0005680	anaphase-promoting complex	--	--
Cluster-29767.107828	--	--	--	--	--	--	--	--	--	--	--	--	--	--	--	--	--	--	--	--	--	--	--	--	--	--	--	--
Cluster-29767.62039	--	--	--	--	--	--	--	--	--	--	--	--	--	--	--	--	--	--	--	--	--	--	--	--	--	--	--	--
Cluster-29767.45624	1340504443	XP_023733169.1	877	1.7e-91	probable serine/threonine-protein kinase samkA [Lactuca sativa]	XM_025128522.1	XM_025128522	297	1.25e-152	PREDICTED: Cynara cardunculus var. scolymus tyrosine-protein kinase-like (LOC112520223), mRNA	--	--	--	--	Q9C9U5	645	5e-66	Probable serine/threonine-protein kinase SIS8 OS=Arabidopsis thaliana OX=3702 GN=SIS8 PE=1 SV=1	PF00069//PF07714	Protein kinase domain//Protein tyrosine and serine/threonine kinase	GO:0006468	protein phosphorylation	GO:0005524//GO:0004672	ATP binding//protein kinase activity	--	--	--	--
Cluster-29767.31223	1387810005	PWA75497.1	482	9.4e-46	Pentatricopeptide repeat-containing protein [Artemisia annua]	--	--	--	--	--	--	--	--	--	--	--	--	--	--	--	--	--	--	--	--	--	--	--
Cluster-29767.74549	1387753050	PWA35697.1	678	3.7e-68	DNA-directed RNA polymerase family protein [Artemisia annua]	XM_022160006.1	XM_022160006	225	2.52e-112	PREDICTED: Helianthus annuus DNA-directed RNA polymerases II, IV and V subunit 3-like (LOC110915327), mRNA	K03011	RPB3, POLR2C	DNA-directed RNA polymerase II subunit RPB3	http://www.genome.jp/dbget-bin/www_bget?ko:K03011	Q39211	501	4.7e-49	DNA-directed RNA polymerases II, IV and V subunit 3 OS=Arabidopsis thaliana OX=3702 GN=NRPB3 PE=1 SV=1	--	--	--	--	--	--	--	--	KOG1522	RNA polymerase II, subunit POLR2C/RPB3
Cluster-14198.0	--	--	--	--	--	--	--	--	--	--	--	--	--	--	--	--	--	--	--	--	--	--	--	--	--	--	--	--
Cluster-29767.32964	1387798594	PWA65834.1	731	1.3e-74	hypothetical protein CTI12_AA299930 [Artemisia annua]	XM_018990815.1	XM_018990815	48	2.89e-14	PREDICTED: Juglans regia microsomal glutathione S-transferase 3-like (LOC109010098), mRNA	K00799	GST, gst	glutathione S-transferase	http://www.genome.jp/dbget-bin/www_bget?ko:K00799	O14880	288	1.1e-24	Microsomal glutathione S-transferase 3 OS=Homo sapiens OX=9606 GN=MGST3 PE=1 SV=1	--	--	--	--	--	--	--	--	--	--
Cluster-19174.0	--	--	--	--	--	--	--	--	--	--	--	--	--	--	--	--	--	--	--	--	--	--	--	--	--	--	--	--
Cluster-22522.0	--	--	--	--	--	--	--	--	--	--	--	--	--	--	--	--	--	--	--	--	--	--	--	--	--	--	--	--
Cluster-16162.0	1387807540	PWA73379.1	174	2.8e-10	Actin-related protein [Artemisia annua]	--	--	--	--	--	--	--	--	--	--	--	--	--	--	--	--	--	--	--	--	--	--	--
Cluster-442.0	1344042746	XP_023901292.1	330	2e-28	uncharacterized protein YKR070W-like [Quercus suber]	XM_018384810.1	XM_018384810	501	0	Fusarium oxysporum f. sp. lycopersici 4287 hypothetical protein mRNA	--	--	--	--	P36151	219	5.6e-17	Uncharacterized protein YKR070W OS=Saccharomyces cerevisiae (strain ATCC 204508 / S288c) OX=559292 GN=YKR070W PE=1 SV=1	--	--	--	--	--	--	--	--	KOG1618	Predicted phosphatase
Cluster-14735.0	--	--	--	--	--	--	--	--	--	--	--	--	--	--	--	--	--	--	--	--	--	--	--	--	--	--	--	--
Cluster-1517.0	--	--	--	--	--	--	--	--	--	--	--	--	--	--	--	--	--	--	--	--	--	--	--	--	--	--	--	--
Cluster-29767.31220	--	--	--	--	--	--	--	--	--	--	--	--	--	--	--	--	--	--	--	--	--	--	--	--	--	--	--	--
Cluster-16927.1	1340468927	XP_023761496.1	914	7.4e-96	uncharacterized protein LOC111909939 [Lactuca sativa]	--	--	--	--	--	--	--	--	--	Q3E8W4	341	7.8e-31	Receptor-like protein kinase ANXUR2 OS=Arabidopsis thaliana OX=3702 GN=ANX2 PE=1 SV=1	PF07714//PF00069	Protein tyrosine and serine/threonine kinase//Protein kinase domain	GO:0006468	protein phosphorylation	GO:0004672//GO:0005524	protein kinase activity//ATP binding	--	--	--	--
Cluster-10827.1	--	--	--	--	--	--	--	--	--	--	--	--	--	--	--	--	--	--	--	--	--	--	--	--	--	--	--	--
Cluster-29767.45625	1340444640	XP_023752398.1	478	9.8e-45	organelle RRM domain-containing protein 1, chloroplastic isoform X1 [Lactuca sativa]	XM_023896631.1	XM_023896631	216	4.35e-107	PREDICTED: Lactuca sativa organelle RRM domain-containing protein 1, chloroplastic (LOC111900753), transcript variant X2, mRNA	--	--	--	--	Q8L440	411	2.2e-38	Organelle RRM domain-containing protein 1, chloroplastic OS=Arabidopsis thaliana OX=3702 GN=ORRM1 PE=1 SV=1	PF00657//PF00076	GDSL-like Lipase/Acylhydrolase//RNA recognition motif. (a.k.a. RRM, RBD, or RNP domain)	--	--	GO:0003676//GO:0016788	nucleic acid binding//hydrolase activity, acting on ester bonds	--	--	--	--
Cluster-29767.53166	1387816847	PWA81517.1	480	3.1e-45	NAC domain containing protein 83 [Artemisia annua]	XM_018983448.1	XM_018983448	98	9.22e-42	PREDICTED: Juglans regia NAC domain-containing protein 83-like (LOC109004777), mRNA	--	--	--	--	Q9FY93	370	6.8e-34	NAC domain-containing protein 83 OS=Arabidopsis thaliana OX=3702 GN=NAC083 PE=1 SV=1	PF02365	No apical meristem (NAM) protein	GO:0006355	regulation of transcription, DNA-templated	GO:0003677	DNA binding	--	--	--	--
Cluster-28291.0	--	--	--	--	--	--	--	--	--	--	--	--	--	--	--	--	--	--	--	--	--	--	--	--	--	--	--	--
Cluster-29767.101394	--	--	--	--	--	--	--	--	--	--	--	--	--	--	--	--	--	--	--	--	--	--	--	--	--	--	--	--
Cluster-29767.61182	--	--	--	--	--	--	--	--	--	--	--	--	--	--	--	--	--	--	PF00508	E2 (early) protein, N terminal	GO:0016032//GO:0006355//GO:0006275	viral process//regulation of transcription, DNA-templated//regulation of DNA replication	--	--	--	--	--	--
Cluster-29767.23954	1387828706	PWA92274.1	186	1.2e-11	Rhodanese-like domain-containing protein [Artemisia annua]	--	--	--	--	--	--	--	--	--	--	--	--	--	--	--	--	--	--	--	--	--	--	--
Cluster-29767.31407	1387810367	PWA75810.1	363	1.9e-31	hypothetical protein CTI12_AA224800 [Artemisia annua]	XM_023904271.1	XM_023904271	131	7.08e-60	PREDICTED: Lactuca sativa vacuolar protein sorting-associated protein 25 (LOC111908444), mRNA	K12189	VPS25, EAP20	ESCRT-II complex subunit VPS25	http://www.genome.jp/dbget-bin/www_bget?ko:K12189	Q8VZC9	276	9.1e-23	Vacuolar protein sorting-associated protein 25 OS=Arabidopsis thaliana OX=3702 GN=VPS25 PE=1 SV=1	PF05871	ESCRT-II complex subunit	GO:0071985	multivesicular body sorting pathway	--	--	GO:0000814	ESCRT II complex	--	--
Cluster-5834.0	--	--	--	--	--	--	--	--	--	--	--	--	--	--	--	--	--	--	--	--	--	--	--	--	--	--	--	--
Cluster-29767.104143	--	--	--	--	--	CP025670.1	CP025670	50	1.36e-15	Ipomoea triloba cultivar NCNSP0323 chromosome 11	--	--	--	--	--	--	--	--	--	--	--	--	--	--	--	--	--	--
Cluster-30473.0	--	--	--	--	--	--	--	--	--	--	--	--	--	--	--	--	--	--	--	--	--	--	--	--	--	--	--	--
Cluster-29767.45626	--	--	--	--	--	--	--	--	--	--	--	--	--	--	--	--	--	--	--	--	--	--	--	--	--	--	--	--
Cluster-29767.60647	346722062	AEO50748.1	1842	4e-203	ICE1 [Chrysanthemum dichroum]	JN129387.1	JN129387	1409	0	Chrysanthemum dichrum ICE1 mRNA, complete cds	--	--	--	--	Q9LSE2	926	2.5e-98	Transcription factor ICE1 OS=Arabidopsis thaliana OX=3702 GN=SCRM PE=1 SV=1	PF00010//PF00046	Helix-loop-helix DNA-binding domain//Homeodomain	--	--	GO:0046983//GO:0003677	protein dimerization activity//DNA binding	--	--	--	--
Cluster-10752.0	--	--	--	--	--	--	--	--	--	--	--	--	--	--	--	--	--	--	--	--	--	--	--	--	--	--	--	--
Cluster-3761.0	--	--	--	--	--	CP030989.1	CP030989	48	1.03e-14	Arachis hypogaea cultivar Shitouqi chromosome A07	--	--	--	--	--	--	--	--	--	--	--	--	--	--	--	--	--	--
Cluster-30998.0	--	--	--	--	--	--	--	--	--	--	--	--	--	--	--	--	--	--	--	--	--	--	--	--	--	--	--	--
Cluster-20491.0	1387787149	PWA56637.1	1451	6.8e-158	RNA-directed DNA polymerase, eukaryota [Artemisia annua]	--	--	--	--	--	--	--	--	--	--	--	--	--	PF00320	GATA zinc finger	GO:0006355	regulation of transcription, DNA-templated	GO:0043565//GO:0008270	sequence-specific DNA binding//zinc ion binding	--	--	--	--
Cluster-29767.49240	--	--	--	--	--	--	--	--	--	--	--	--	--	--	--	--	--	--	--	--	--	--	--	--	--	--	--	--
Cluster-18979.0	--	--	--	--	--	--	--	--	--	--	--	--	--	--	--	--	--	--	--	--	--	--	--	--	--	--	--	--
Cluster-28388.0	1387789845	PWA58743.1	1646	1.3e-180	Pentatricopeptide repeat-containing protein [Artemisia annua]	XM_025129530.1	XM_025129530	403	0	PREDICTED: Cynara cardunculus var. scolymus pentatricopeptide repeat-containing protein At5g56310 (LOC112520905), mRNA	--	--	--	--	Q9FMA1	980	8.6e-105	Pentatricopeptide repeat-containing protein At5g56310 OS=Arabidopsis thaliana OX=3702 GN=PCMP-E13 PE=2 SV=1	PF00637	Region in Clathrin and VPS	GO:0016192//GO:0006886	vesicle-mediated transport//intracellular protein transport	--	--	--	--	--	--
Cluster-29767.31406	1387820766	PWA85024.1	786	2.8e-81	Integrase, catalytic region, Zinc finger, CCHC-type, Peptidase aspartic, catalytic [Artemisia annua]	KP333150.1	KP333150	131	1.09e-60	Chrysanthemum x morifolium microsatellite JH-1316 sequence	--	--	--	--	P10978	198	1.6e-14	Retrovirus-related Pol polyprotein from transposon TNT 1-94 OS=Nicotiana tabacum OX=4097 PE=2 SV=1	PF00665	Integrase core domain	GO:0015074	DNA integration	--	--	--	--	--	--
Cluster-30181.0	--	--	--	--	--	--	--	--	--	--	--	--	--	--	--	--	--	--	--	--	--	--	--	--	--	--	--	--
Cluster-31451.0	1387771642	PWA45482.1	404	7.5e-37	ethylene-responsive transcription factor 4 [Artemisia annua]	--	--	--	--	--	K09286	EREBP	EREBP-like factor	http://www.genome.jp/dbget-bin/www_bget?ko:K09286	Q9SAD4	253	9.3e-21	Ethylene-responsive transcription factor ESR1 OS=Arabidopsis thaliana OX=3702 GN=ESR1 PE=1 SV=1	PF00847	AP2 domain	GO:0006355	regulation of transcription, DNA-templated	GO:0003700	DNA-binding transcription factor activity	GO:0005667	transcription regulator complex	--	--
Cluster-3620.0	--	--	--	--	--	--	--	--	--	--	--	--	--	--	--	--	--	--	--	--	--	--	--	--	--	--	--	--
Cluster-29767.49246	--	--	--	--	--	--	--	--	--	--	--	--	--	--	--	--	--	--	--	--	--	--	--	--	--	--	--	--
Cluster-15095.0	1387798258	PWA65548.1	171	8.7e-10	ACT domain-containing protein ACR1 [Artemisia annua]	--	--	--	--	--	--	--	--	--	--	--	--	--	--	--	--	--	--	--	--	--	--	--
Cluster-29767.3549	--	--	--	--	--	--	--	--	--	--	--	--	--	--	--	--	--	--	--	--	--	--	--	--	--	--	--	--
Cluster-29767.45627	1387766195	PWA41983.1	469	1.3e-44	NB-ARC domains-containing protein [Artemisia annua]	--	--	--	--	--	--	--	--	--	--	--	--	--	PF13855//PF00560	Leucine rich repeat//Leucine Rich Repeat	--	--	GO:0005515	protein binding	--	--	--	--
Cluster-29767.33439	1219131582	XP_021729108.1	300	4.9e-25	CLP protease regulatory subunit CLPX1, mitochondrial-like [Chenopodium quinoa]	XM_023884941.1	XM_023884941	117	4.99e-53	PREDICTED: Lactuca sativa CLP protease regulatory subunit CLPX1, mitochondrial-like (LOC111888823), transcript variant X3, mRNA	K03544	clpX, CLPX	ATP-dependent Clp protease ATP-binding subunit ClpX	http://www.genome.jp/dbget-bin/www_bget?ko:K03544	Q9FK07	295	7e-26	CLP protease regulatory subunit CLPX1, mitochondrial OS=Arabidopsis thaliana OX=3702 GN=CLPX1 PE=2 SV=1	PF01993//PF00004//PF07724//PF00427	methylene-5,6,7,8-tetrahydromethanopterin dehydrogenase//ATPase family associated with various cellular activities (AAA)//AAA domain (Cdc48 subfamily)//Phycobilisome Linker polypeptide	GO:0055114//GO:0015948//GO:0015979	oxidation-reduction process//methanogenesis//photosynthesis	GO:0008901//GO:0005524	ferredoxin hydrogenase activity//ATP binding	GO:0009375//GO:0030089	ferredoxin hydrogenase complex//phycobilisome	KOG0745	Putative ATP-dependent Clp-type protease (AAA+ ATPase superfamily)
Cluster-29767.111315	--	--	--	--	--	--	--	--	--	--	--	--	--	--	--	--	--	--	--	--	--	--	--	--	--	--	--	--
Cluster-29767.36166	1387763074	PWA40169.1	587	1.2e-57	Carbonic anhydrase [Artemisia annua]	--	--	--	--	--	K01673	cynT, can	carbonic anhydrase	http://www.genome.jp/dbget-bin/www_bget?ko:K01673	P27141	289	1.7e-24	Carbonic anhydrase, chloroplastic OS=Nicotiana tabacum OX=4097 PE=2 SV=1	PF03073//PF00484	TspO/MBR family//Carbonic anhydrase	GO:0006730//GO:0006807	one-carbon metabolic process//nitrogen compound metabolic process	GO:0004089//GO:0008270	carbonate dehydratase activity//zinc ion binding	GO:0016021	integral component of membrane	--	--
Cluster-29767.60641	1387791006	PWA59660.1	852	1e-88	RHD3/Sey1, P-loop containing nucleoside triphosphate hydrolase [Artemisia annua]	XM_022153805.1	XM_022153805	314	3.49e-162	PREDICTED: Helianthus annuus protein ROOT HAIR DEFECTIVE 3-like (LOC110908815), mRNA	--	--	--	--	P93042	523	5.6e-52	Protein ROOT HAIR DEFECTIVE 3 OS=Arabidopsis thaliana OX=3702 GN=RHD3 PE=1 SV=1	--	--	--	--	--	--	--	--	--	--
Cluster-29767.32969	1387832774	PWA96066.1	1090	4e-116	ammonium transporter 2 [Artemisia annua]	XM_025119545.1	XM_025119545	249	7.3e-126	PREDICTED: Cynara cardunculus var. scolymus ammonium transporter 2 (LOC112513315), mRNA	K03320	amt, AMT, MEP	ammonium transporter, Amt family	http://www.genome.jp/dbget-bin/www_bget?ko:K03320	Q9M6N7	882	2e-93	Ammonium transporter 2 OS=Arabidopsis thaliana OX=3702 GN=AMT2 PE=1 SV=2	PF12326//PF00909	N-glycosylation protein//Ammonium Transporter Family	GO:0034599//GO:0015696	cellular response to oxidative stress//ammonium transport	GO:0008519	ammonium transmembrane transporter activity	GO:0005789//GO:0016020	endoplasmic reticulum membrane//membrane	--	--
Cluster-29767.111314	--	--	--	--	--	--	--	--	--	--	--	--	--	--	--	--	--	--	--	--	--	--	--	--	--	--	--	--
Cluster-12144.0	--	--	--	--	--	--	--	--	--	--	--	--	--	--	--	--	--	--	--	--	--	--	--	--	--	--	--	--
Cluster-29767.49245	1387827999	PWA91622.1	1841	5.2e-203	hypothetical protein CTI12_AA089180 [Artemisia annua]	KP332432.1	KP332432	116	9.84e-52	Chrysanthemum x morifolium microsatellite JH-592 sequence	--	--	--	--	--	--	--	--	PF07464//PF02632	Apolipophorin-III precursor (apoLp-III)//BioY family	GO:0006869//GO:0015878	lipid transport//biotin transport	GO:0008289//GO:0015225	lipid binding//biotin transmembrane transporter activity	GO:0005576//GO:0005886	extracellular region//plasma membrane	--	--
Cluster-29767.111317	--	--	--	--	--	--	--	--	--	--	--	--	--	--	--	--	--	--	--	--	--	--	--	--	--	--	--	--
Cluster-21726.0	--	--	--	--	--	NC_039647.1	NC_039647	80	5.07e-32	Artemisia selengensis chloroplast, complete genome	--	--	--	--	--	--	--	--	--	--	--	--	--	--	--	--	--	--
Cluster-4568.0	--	--	--	--	--	--	--	--	--	--	--	--	--	--	--	--	--	--	--	--	--	--	--	--	--	--	--	--
Cluster-29767.111316	1387799654	PWA66719.1	1108	8.6e-118	hypothetical protein CTI12_AA324950 [Artemisia annua]	XM_022123202.1	XM_022123202	78	2.21e-30	PREDICTED: Helianthus annuus uncharacterized LOC110874733 (LOC110874733), mRNA	--	--	--	--	--	--	--	--	--	--	--	--	--	--	--	--	--	--
Cluster-29767.53748	1387764311	PWA40881.1	1142	4.3e-122	hypothetical protein CTI12_AA556840 [Artemisia annua]	XM_022139702.1	XM_022139702	143	7.01e-67	PREDICTED: Helianthus annuus uncharacterized LOC110892546 (LOC110892546), mRNA	--	--	--	--	--	--	--	--	--	--	--	--	--	--	--	--	--	--
Cluster-29767.53749	1387804213	PWA70525.1	1412	2.5e-153	PWWP-like protein [Artemisia annua]	XM_025106003.1	XM_025106003	235	6.12e-118	PREDICTED: Cynara cardunculus var. scolymus uncharacterized protein At1g51745-like (LOC112502164), transcript variant X1, mRNA	--	--	--	--	--	--	--	--	PF07966//PF02724//PF10486	A1 Propeptide//CDC45-like protein//Phosphoinositide 3-kinase gamma adapter protein p101 subunit	GO:0006270//GO:0006508	DNA replication initiation//proteolysis	GO:0004190//GO:0046935	aspartic-type endopeptidase activity//1-phosphatidylinositol-3-kinase regulator activity	GO:0005944	phosphatidylinositol 3-kinase complex, class IB	--	--
Cluster-29767.33435	--	--	--	--	--	--	--	--	--	--	K13600	CAO	chlorophyllide a oxygenase	http://www.genome.jp/dbget-bin/www_bget?ko:K13600	--	--	--	--	--	--	--	--	--	--	--	--	--	--
Cluster-11907.0	--	--	--	--	--	--	--	--	--	--	--	--	--	--	--	--	--	--	--	--	--	--	--	--	--	--	--	--
Cluster-29767.53745	1191639357	OTF91359.1	246	8.7e-19	putative root cap [Helianthus annuus]	--	--	--	--	--	--	--	--	--	--	--	--	--	--	--	--	--	--	--	--	--	--	--
Cluster-13876.1	--	--	--	--	--	--	--	--	--	--	--	--	--	--	--	--	--	--	--	--	--	--	--	--	--	--	--	--
Cluster-29767.53747	--	--	--	--	--	XR_003055005.1	XR_003055005	47	1.96e-13	PREDICTED: Ziziphus jujuba small nucleolar RNA snoR127 (LOC112490810), ncRNA	--	--	--	--	--	--	--	--	--	--	--	--	--	--	--	--	--	--
Cluster-29767.53740	1387796525	PWA64107.1	179	3.9e-11	serpin-ZX [Artemisia annua]	--	--	--	--	--	K13963	SERPINB	serpin B	http://www.genome.jp/dbget-bin/www_bget?ko:K13963	Q41593	121	7.8e-06	Serpin-Z1A OS=Triticum aestivum OX=4565 GN=WZCI PE=1 SV=1	--	--	--	--	--	--	--	--	--	--
Cluster-29767.49248	1387819584	PWA83959.1	1062	8.2e-113	polypyrimidine tract-binding protein 3 [Artemisia annua]	XM_025113638.1	XM_025113638	395	0	PREDICTED: Cynara cardunculus var. scolymus polypyrimidine tract-binding protein homolog 3 (LOC112508841), mRNA	K14948	PTBP2, NPTB	polypyrimidine tract-binding protein 2	http://www.genome.jp/dbget-bin/www_bget?ko:K14948	Q6ICX4	937	9.7e-100	Polypyrimidine tract-binding protein homolog 3 OS=Arabidopsis thaliana OX=3702 GN=At1g43190 PE=2 SV=1	PF16367//PF00076//PF00019	RNA recognition motif//RNA recognition motif. (a.k.a. RRM, RBD, or RNP domain)//Transforming growth factor beta like domain	GO:0040007//GO:0008283//GO:0007165	growth//cell population proliferation//signal transduction	GO:0008083//GO:0003676	growth factor activity//nucleic acid binding	--	--	KOG1190	Polypyrimidine tract-binding protein
Cluster-29767.53742	1387836436	PWA99542.1	2438	4.4e-272	hypothetical protein CTI12_AA005400 [Artemisia annua]	XM_022146923.1	XM_022146923	645	0	PREDICTED: Helianthus annuus uncharacterized LOC110900022 (LOC110900022), transcript variant X1, mRNA	--	--	--	--	Q5UNY4	473	1.2e-45	Uncharacterized protein L728 OS=Acanthamoeba polyphaga mimivirus OX=212035 GN=MIMI_L728 PE=4 SV=1	PF03079	ARD/ARD' family	GO:0055114	oxidation-reduction process	GO:0010309	acireductone dioxygenase [iron(II)-requiring] activity	--	--	--	--
Cluster-29767.53743	1387812651	PWA77813.1	605	3.5e-60	hypothetical protein CTI12_AA220800 [Artemisia annua]	XM_023898728.1	XM_023898728	207	8.09e-103	PREDICTED: Lactuca sativa uncharacterized LOC111902918 (LOC111902918), mRNA	--	--	--	--	Q5UNY4	161	4.1e-10	Uncharacterized protein L728 OS=Acanthamoeba polyphaga mimivirus OX=212035 GN=MIMI_L728 PE=4 SV=1	--	--	--	--	--	--	--	--	--	--
Cluster-10377.0	--	--	--	--	--	--	--	--	--	--	--	--	--	--	--	--	--	--	--	--	--	--	--	--	--	--	--	--
Cluster-29767.36161	1387816300	PWA81032.1	775	1e-79	ARID DNA-binding domain, HSP20-like chaperone [Artemisia annua]	XM_025136100.1	XM_025136100	352	0	PREDICTED: Cynara cardunculus var. scolymus AT-rich interactive domain-containing protein 6-like (LOC112525820), mRNA	--	--	--	--	Q0WNR6	513	9.2e-51	AT-rich interactive domain-containing protein 5 OS=Arabidopsis thaliana OX=3702 GN=ARID5 PE=1 SV=1	--	--	--	--	--	--	--	--	--	--
Cluster-29767.33437	--	--	--	--	--	--	--	--	--	--	--	--	--	--	--	--	--	--	--	--	--	--	--	--	--	--	--	--
Cluster-29767.32968	1387791412	PWA59978.1	290	1.3e-23	ent-kaurene oxidase CYP701A5 [Artemisia annua]	AY364317.1	AY364317	76	5.82e-30	Stevia rebaudiana ent-kaurene oxidase CYP701A5 (KO1) mRNA, complete cds	K04122	GA3, CYP701	ent-kaurene oxidase	http://www.genome.jp/dbget-bin/www_bget?ko:K04122	Q93ZB2	175	1.1e-11	Ent-kaurene oxidase, chloroplastic OS=Arabidopsis thaliana OX=3702 GN=KO PE=1 SV=2	PF00067	Cytochrome P450	GO:0055114	oxidation-reduction process	GO:0016705//GO:0020037//GO:0005506	oxidoreductase activity, acting on paired donors, with incorporation or reduction of molecular oxygen//heme binding//iron ion binding	--	--	--	--
Cluster-29767.111313	--	--	--	--	--	--	--	--	--	--	--	--	--	--	--	--	--	--	--	--	--	--	--	--	--	--	--	--
Cluster-2455.0	1387810319	PWA75769.1	300	3.6e-25	Zinc finger, RING-CH-type [Artemisia annua]	--	--	--	--	--	--	--	--	--	--	--	--	--	PF05478	Prominin	--	--	--	--	GO:0016021	integral component of membrane	--	--
Cluster-29767.111312	1387812451	PWA77638.1	1564	8.6e-171	hypothetical protein CTI12_AA100800 [Artemisia annua]	XM_025112569.1	XM_025112569	487	0	PREDICTED: Cynara cardunculus var. scolymus uncharacterized LOC112507841 (LOC112507841), mRNA	--	--	--	--	--	--	--	--	--	--	--	--	--	--	--	--	--	--
Cluster-29767.111842	--	--	--	--	--	--	--	--	--	--	--	--	--	--	--	--	--	--	PF03839	Translocation protein Sec62	GO:0015031	protein transport	--	--	GO:0030176	integral component of endoplasmic reticulum membrane	--	--
Cluster-29767.70242	1389811708	XP_024970484.1	173	9.4e-10	26S proteasome non-ATPase regulatory subunit 6 homolog [Cynara cardunculus var. scolymus]	XM_023917095.1	XM_023917095	86	3.25e-35	PREDICTED: Lactuca sativa 26S proteasome non-ATPase regulatory subunit 6 homolog (LOC111921511), mRNA	K03037	PSMD6, RPN7	26S proteasome regulatory subunit N7	http://www.genome.jp/dbget-bin/www_bget?ko:K03037	Q8W425	165	3e-10	26S proteasome non-ATPase regulatory subunit 6 OS=Oryza sativa subsp. japonica OX=39947 GN=RPN7 PE=2 SV=1	--	--	--	--	--	--	--	--	--	--
Cluster-29767.70243	1387834783	PWA97965.1	393	1.7e-35	FCP1-like domain, HAD-like domain protein [Artemisia annua]	XM_025136310.1	XM_025136310	109	3e-48	PREDICTED: Cynara cardunculus var. scolymus CTD nuclear envelope phosphatase 1 homolog (LOC112525972), transcript variant X2, mRNA	K15731	CTDSP	carboxy-terminal domain RNA polymerase II polypeptide A small phosphatase	http://www.genome.jp/dbget-bin/www_bget?ko:K15731	--	--	--	--	--	--	--	--	--	--	--	--	--	--
Cluster-29767.70240	1387771386	PWA45307.1	197	5.2e-13	leucine-rich repeat protein [Artemisia annua]	XM_023874087.1	XM_023874087	49	3.85e-15	PREDICTED: Lactuca sativa receptor kinase-like protein Xa21 (LOC111877572), transcript variant X2, mRNA	--	--	--	--	--	--	--	--	--	--	--	--	--	--	--	--	--	--
Cluster-29767.70241	1387797612	PWA65010.1	2124	7.5e-236	chaperonin Cpn60/TCP-1 family [Artemisia annua]	XM_022150268.1	XM_022150268	824	0	PREDICTED: Helianthus annuus T-complex protein 1 subunit gamma-like (LOC110904418), mRNA	K09495	CCT3, TRIC5	T-complex protein 1 subunit gamma	http://www.genome.jp/dbget-bin/www_bget?ko:K09495	Q84WV1	2012	2.8e-224	T-complex protein 1 subunit gamma OS=Arabidopsis thaliana OX=3702 GN=CCT3 PE=1 SV=1	PF00118	TCP-1/cpn60 chaperonin family	--	--	GO:0005524	ATP binding	--	--	KOG0364	Chaperonin complex component, TCP-1 gamma subunit (CCT3)
Cluster-29767.70246	1387812317	PWA77523.1	352	9.6e-31	transducin/WD40 repeat-like superfamily protein [Artemisia annua]	XM_022146152.1	XM_022146152	106	1.43e-46	PREDICTED: Helianthus annuus uncharacterized WD repeat-containing protein C17D11.16-like (LOC110899272), mRNA	K14791	PWP1	periodic tryptophan protein 1	http://www.genome.jp/dbget-bin/www_bget?ko:K14791	Q9P775	153	4.3e-09	Uncharacterized WD repeat-containing protein C17D11.16 OS=Schizosaccharomyces pombe (strain 972 / ATCC 24843) OX=284812 GN=SPBC1711.16 PE=1 SV=1	--	--	--	--	--	--	--	--	KOG0270	WD40 repeat-containing protein
Cluster-29767.68439	--	--	--	--	--	--	--	--	--	--	--	--	--	--	--	--	--	--	--	--	--	--	--	--	--	--	--	--
Cluster-29767.70244	1387770438	PWA44679.1	291	3.3e-23	FCP1-like domain, HAD-like domain protein [Artemisia annua]	XM_025136309.1	XM_025136309	116	1.19e-51	PREDICTED: Cynara cardunculus var. scolymus CTD nuclear envelope phosphatase 1 homolog (LOC112525972), transcript variant X1, mRNA	K15731	CTDSP	carboxy-terminal domain RNA polymerase II polypeptide A small phosphatase	http://www.genome.jp/dbget-bin/www_bget?ko:K15731	--	--	--	--	--	--	--	--	--	--	--	--	--	--
Cluster-17234.0	1228833097	XP_021974525.1	150	1.9e-07	uncharacterized protein LOC110869591 [Helianthus annuus]	--	--	--	--	--	--	--	--	--	--	--	--	--	--	--	--	--	--	--	--	--	--	--
Cluster-29767.1123	--	--	--	--	--	--	--	--	--	--	--	--	--	--	--	--	--	--	--	--	--	--	--	--	--	--	--	--
Cluster-29767.68435	1387833732	PWA96973.1	1335	1.6e-144	Leucine-rich repeat-containing protein [Artemisia annua]	XM_023897139.1	XM_023897139	351	0	PREDICTED: Lactuca sativa receptor-like protein 12 (LOC111901285), mRNA	--	--	--	--	O49879	620	5.1e-63	Receptor-like protein Cf-9 homolog OS=Solanum lycopersicum OX=4081 GN=HCR9-0 PE=2 SV=2	PF13855//PF13516//PF00560	Leucine rich repeat//Leucine Rich repeat//Leucine Rich Repeat	--	--	GO:0005515	protein binding	--	--	--	--
Cluster-29767.68436	1387800450	PWA67383.1	788	1.8e-81	Leucine-rich repeat-containing protein [Artemisia annua]	--	--	--	--	--	--	--	--	--	Q9S9U3	235	8.9e-19	Receptor-like protein 53 OS=Arabidopsis thaliana OX=3702 GN=RLP53 PE=3 SV=1	PF13516//PF13855//PF00560	Leucine Rich repeat//Leucine rich repeat//Leucine Rich Repeat	--	--	GO:0005515	protein binding	--	--	--	--
Cluster-29767.60648	1387821227	PWA85437.1	6497	0	autophagy 2 [Artemisia annua]	XM_022172544.1	XM_022172544	531	0	PREDICTED: Helianthus annuus autophagy-related protein 2 (LOC110929389), mRNA	K17906	ATG2	autophagy-related protein 2	http://www.genome.jp/dbget-bin/www_bget?ko:K17906	F8S296	1898	1.1e-210	Autophagy-related protein 2 OS=Arabidopsis thaliana OX=3702 GN=ATG2 PE=2 SV=1	--	--	--	--	--	--	--	--	--	--
Cluster-29767.68430	1387829445	PWA92958.1	884	1.3e-92	Leucine-rich repeat-containing protein [Artemisia annua]	--	--	--	--	--	--	--	--	--	Q5MR23	403	3e-38	Receptor-like protein 9DC3 OS=Solanum pimpinellifolium OX=4084 GN=9DC3 PE=3 SV=1	PF00560//PF13855//PF13516	Leucine Rich Repeat//Leucine rich repeat//Leucine Rich repeat	--	--	GO:0005515	protein binding	--	--	--	--
Cluster-29767.68431	1387829445	PWA92958.1	519	3.4e-50	Leucine-rich repeat-containing protein [Artemisia annua]	--	--	--	--	--	--	--	--	--	Q5MR23	309	2.9e-27	Receptor-like protein 9DC3 OS=Solanum pimpinellifolium OX=4084 GN=9DC3 PE=3 SV=1	--	--	--	--	--	--	--	--	--	--
Cluster-29767.68432	1387798718	PWA65939.1	265	4.7e-21	leucine-rich repeat protein [Artemisia annua]	XM_025103066.1	XM_025103066	88	5.52e-37	PREDICTED: Cynara cardunculus var. scolymus receptor-like protein 9DC3 (LOC112499758), mRNA	--	--	--	--	--	--	--	--	--	--	--	--	--	--	--	--	--	--
Cluster-23897.0	--	--	--	--	--	--	--	--	--	--	--	--	--	--	--	--	--	--	--	--	--	--	--	--	--	--	--	--
Cluster-29767.36160	1387824376	PWA88294.1	622	2e-62	cellulose synthase A catalytic subunit 9 [Artemisia annua]	--	--	--	--	--	K10999	CESA	cellulose synthase A	http://www.genome.jp/dbget-bin/www_bget?ko:K10999	O48946	379	1.1e-35	Cellulose synthase A catalytic subunit 1 [UDP-forming] OS=Arabidopsis thaliana OX=3702 GN=CESA1 PE=1 SV=1	PF03552	Cellulose synthase	GO:0030244//GO:0005985//GO:0005982//GO:0006011	cellulose biosynthetic process//sucrose metabolic process//starch metabolic process//UDP-glucose metabolic process	GO:0016760	cellulose synthase (UDP-forming) activity	GO:0016020	membrane	--	--
Cluster-29767.62649	1387817160	PWA81800.1	1732	2.9e-190	F-box domain-containing protein [Artemisia annua]	XM_025128206.1	XM_025128206	276	1.46e-140	PREDICTED: Cynara cardunculus var. scolymus putative F-box protein At3g23950 (LOC112519891), mRNA	--	--	--	--	Q9FGY4	195	1.9e-13	F-box protein At5g49610 OS=Arabidopsis thaliana OX=3702 GN=At5g49610 PE=1 SV=1	PF00646//PF12937	F-box domain//F-box-like	--	--	GO:0005515	protein binding	--	--	--	--
Cluster-17327.0	--	--	--	--	--	--	--	--	--	--	--	--	--	--	--	--	--	--	PF07440	Caerin 1 protein	--	--	--	--	GO:0005576	extracellular region	--	--
Cluster-29767.62648	1387763063	PWA40161.1	1250	2.3e-134	Nucleotide-binding, alpha-beta plait [Artemisia annua]	XM_025130470.1	XM_025130470	198	3.32e-97	PREDICTED: Cynara cardunculus var. scolymus heterogeneous nuclear ribonucleoprotein H2 (LOC112521550), transcript variant X1, mRNA	K12898	HNRNPF_H	heterogeneous nuclear ribonucleoprotein F/H	http://www.genome.jp/dbget-bin/www_bget?ko:K12898	Q60HC3	267	8.3e-22	Heterogeneous nuclear ribonucleoprotein F OS=Macaca fascicularis OX=9541 GN=HNRNPF PE=2 SV=3	PF16367//PF00076	RNA recognition motif//RNA recognition motif. (a.k.a. RRM, RBD, or RNP domain)	--	--	GO:0003676	nucleic acid binding	--	--	KOG1365	RNA-binding protein Fusilli, contains RRM domain
Cluster-29767.32158	1387827593	PWA91245.1	177	3.1e-10	nucleolar complex protein 2 [Artemisia annua]	KP333191.1	KP333191	39	4.22e-09	Chrysanthemum x morifolium microsatellite JH-1357 sequence	--	--	--	--	--	--	--	--	PF04834	Early E3 14.5 kDa protein	GO:0009966	regulation of signal transduction	--	--	GO:0016021	integral component of membrane	--	--
Cluster-32767.0	--	--	--	--	--	--	--	--	--	--	--	--	--	--	--	--	--	--	--	--	--	--	--	--	--	--	--	--
Cluster-29767.37227	1387812420	PWA77611.1	554	1.4e-54	linoleate 13S-lipoxygenase 2-1 protein [Artemisia annua]	XM_025126864.1	XM_025126864	193	2.34e-95	PREDICTED: Cynara cardunculus var. scolymus linoleate 13S-lipoxygenase 2-1, chloroplastic-like (LOC112519000), mRNA	K00454	LOX2S	lipoxygenase	http://www.genome.jp/dbget-bin/www_bget?ko:K00454	O24370	371	9.1e-35	Linoleate 13S-lipoxygenase 2-1, chloroplastic OS=Solanum tuberosum OX=4113 GN=LOX2.1 PE=1 SV=1	PF00305	Lipoxygenase	GO:0055114	oxidation-reduction process	GO:0046872//GO:0016702	metal ion binding//oxidoreductase activity, acting on single donors with incorporation of molecular oxygen, incorporation of two atoms of oxygen	--	--	--	--
Cluster-26657.0	--	--	--	--	--	--	--	--	--	--	--	--	--	--	--	--	--	--	--	--	--	--	--	--	--	--	--	--
Cluster-29767.32159	--	--	--	--	--	KP333133.1	KP333133	250	9.03e-127	Chrysanthemum x morifolium microsatellite JH-1299 sequence	--	--	--	--	--	--	--	--	--	--	--	--	--	--	--	--	--	--
Cluster-10624.0	--	--	--	--	--	--	--	--	--	--	--	--	--	--	--	--	--	--	--	--	--	--	--	--	--	--	--	--
Cluster-23593.0	--	--	--	--	--	--	--	--	--	--	--	--	--	--	--	--	--	--	--	--	--	--	--	--	--	--	--	--
Cluster-17911.0	1387776694	PWA48938.1	612	4.2e-61	RNA-directed DNA polymerase, eukaryota, Reverse transcriptase zinc-binding domain protein [Artemisia annua]	--	--	--	--	--	--	--	--	--	P11369	210	6.6e-16	LINE-1 retrotransposable element ORF2 protein OS=Mus musculus OX=10090 GN=Pol PE=1 SV=2	--	--	--	--	--	--	--	--	--	--
Cluster-29767.45622	1389825292	XP_024977764.1	169	9.4e-10	glycine-rich domain-containing protein 1 isoform X2 [Cynara cardunculus var. scolymus]	XM_025112151.1	XM_025112151	70	8.48e-27	PREDICTED: Cynara cardunculus var. scolymus glycine-rich domain-containing protein 1-like (LOC112507522), mRNA	--	--	--	--	Q9ZQ47	151	4.4e-09	Glycine-rich domain-containing protein 1 OS=Arabidopsis thaliana OX=3702 GN=GRDP1 PE=2 SV=1	--	--	--	--	--	--	--	--	--	--
Cluster-29767.53365	1191680583	OTG32546.1	1079	5.7e-115	putative cupredoxin [Helianthus annuus]	XM_025129854.1	XM_025129854	404	0	PREDICTED: Cynara cardunculus var. scolymus monocopper oxidase-like protein SKU5 (LOC112521150), mRNA	--	--	--	--	Q9SU40	939	3.7e-100	Monocopper oxidase-like protein SKU5 OS=Arabidopsis thaliana OX=3702 GN=SKU5 PE=1 SV=1	PF07731//PF01940	Multicopper oxidase//Integral membrane protein DUF92	GO:0055114	oxidation-reduction process	GO:0016491//GO:0005507	oxidoreductase activity//copper ion binding	GO:0016021	integral component of membrane	--	--
Cluster-25409.0	--	--	--	--	--	--	--	--	--	--	--	--	--	--	--	--	--	--	--	--	--	--	--	--	--	--	--	--
Cluster-12761.0	1387795475	PWA63245.1	297	2.3e-24	tyrosyl-DNA phosphodiesterase [Artemisia annua]	XM_025128126.1	XM_025128126	106	1.44e-46	PREDICTED: Cynara cardunculus var. scolymus tyrosyl-DNA phosphodiesterase 1 (LOC112519831), mRNA	K10862	TDP1	tyrosyl-DNA phosphodiesterase 1	http://www.genome.jp/dbget-bin/www_bget?ko:K10862	Q8H1D9	237	8e-19	Tyrosyl-DNA phosphodiesterase 1 OS=Arabidopsis thaliana OX=3702 GN=TDP1 PE=1 SV=1	--	--	--	--	--	--	--	--	--	--
Cluster-29767.15432	--	--	--	--	--	--	--	--	--	--	--	--	--	--	--	--	--	--	--	--	--	--	--	--	--	--	--	--
Cluster-9950.0	1387832082	PWA95416.1	178	5.9e-11	hypothetical protein CTI12_AA051210 [Artemisia annua]	--	--	--	--	--	--	--	--	--	--	--	--	--	--	--	--	--	--	--	--	--	--	--
Cluster-14820.0	--	--	--	--	--	--	--	--	--	--	--	--	--	--	--	--	--	--	--	--	--	--	--	--	--	--	--	--
Cluster-29767.5598	--	--	--	--	--	--	--	--	--	--	--	--	--	--	--	--	--	--	--	--	--	--	--	--	--	--	--	--
Cluster-29767.31402	1191666080	OTG18048.1	427	1.7e-39	putative harbinger transposase-derived protein [Helianthus annuus]	--	--	--	--	--	--	--	--	--	--	--	--	--	PF04827	Plant transposon protein	--	--	GO:0016788	hydrolase activity, acting on ester bonds	--	--	--	--
Cluster-3096.0	1343969903	XP_023870880.1	215	3.1e-15	carboxypeptidase Y homolog A-like [Quercus suber]	XM_018379044.1	XM_018379044	364	0	Fusarium oxysporum f. sp. lycopersici 4287 hypothetical protein partial mRNA	K16298	SCPL-IV	serine carboxypeptidase-like clade IV	http://www.genome.jp/dbget-bin/www_bget?ko:K16298	C7YQJ2	348	4.5e-32	Carboxypeptidase Y homolog A OS=Nectria haematococca (strain 77-13-4 / ATCC MYA-4622 / FGSC 9596 / MPVI) OX=660122 GN=CPYA PE=3 SV=1	PF00450	Serine carboxypeptidase	GO:0006508	proteolysis	GO:0004185	serine-type carboxypeptidase activity	--	--	KOG1282	Serine carboxypeptidases (lysosomal cathepsin A)
Cluster-12620.0	--	--	--	--	--	--	--	--	--	--	--	--	--	--	--	--	--	--	--	--	--	--	--	--	--	--	--	--
Cluster-29767.20254	--	--	--	--	--	--	--	--	--	--	--	--	--	--	--	--	--	--	PF00895	ATP synthase protein 8	GO:0015986	ATP synthesis coupled proton transport	GO:0015078	proton transmembrane transporter activity	GO:0000276	mitochondrial proton-transporting ATP synthase complex, coupling factor F(o)	--	--
Cluster-29767.20255	1387793528	PWA61668.1	1328	1.6e-143	aluminum-activated malate transporter 9 [Artemisia annua]	XM_025139417.1	XM_025139417	416	0	PREDICTED: Cynara cardunculus var. scolymus aluminum-activated malate transporter 9-like (LOC112528395), mRNA	--	--	--	--	Q9LS46	809	9.4e-85	Aluminum-activated malate transporter 9 OS=Arabidopsis thaliana OX=3702 GN=ALMT9 PE=2 SV=1	PF15461//PF04632//PF11744	Beta-carotene 15,15'-dioxygenase//Fusaric acid resistance protein family//Aluminium activated malate transporter	GO:0055114//GO:0055085//GO:0015743	oxidation-reduction process//transmembrane transport//malate transport	GO:0016702//GO:0022857	oxidoreductase activity, acting on single donors with incorporation of molecular oxygen, incorporation of two atoms of oxygen//transmembrane transporter activity	GO:0005886	plasma membrane	--	--
Cluster-29767.20256	976922519	KVI06906.1	1437	1.9e-156	Pentatricopeptide repeat-containing protein [Cynara cardunculus var. scolymus]	--	--	--	--	--	--	--	--	--	Q9SJG6	966	3e-103	Pentatricopeptide repeat-containing protein At2g42920, chloroplastic OS=Arabidopsis thaliana OX=3702 GN=PCMP-E75 PE=2 SV=1	PF14432	DYW family of nucleic acid deaminases	--	--	GO:0008270	zinc ion binding	--	--	--	--
Cluster-29767.20257	1387794273	PWA62269.1	553	2.3e-54	zinc finger, CCHC-type [Artemisia annua]	--	--	--	--	--	--	--	--	--	--	--	--	--	--	--	--	--	--	--	--	--	--	--
Cluster-29767.20250	1387835461	PWA98610.1	319	7.2e-27	hypothetical protein CTI12_AA016780 [Artemisia annua]	--	--	--	--	--	--	--	--	--	Q9LXI8	180	3.6e-12	Protein LITTLE ZIPPER 3 OS=Arabidopsis thaliana OX=3702 GN=ZPR3 PE=1 SV=1	PF12179//PF06005	I-kappa-kinase-beta NEMO binding domain//Cell division protein ZapB	GO:0009069//GO:0016310//GO:0090529//GO:0043093	serine family amino acid metabolic process//phosphorylation//cell septum assembly//FtsZ-dependent cytokinesis	GO:0008384	IkappaB kinase activity	GO:0005737//GO:0008385	cytoplasm//IkappaB kinase complex	--	--
Cluster-29767.20251	--	--	--	--	--	--	--	--	--	--	--	--	--	--	--	--	--	--	--	--	--	--	--	--	--	--	--	--
Cluster-29767.45623	1387831569	PWA94936.1	916	2.6e-96	zinc finger, CCHC-type [Artemisia annua]	--	--	--	--	--	--	--	--	--	P10978	344	2.1e-31	Retrovirus-related Pol polyprotein from transposon TNT 1-94 OS=Nicotiana tabacum OX=4097 PE=2 SV=1	--	--	--	--	--	--	--	--	--	--
Cluster-29767.20253	1387796732	PWA64279.1	865	9.4e-90	hydroxyproline-rich glycoprotein family protein [Artemisia annua]	XM_023914632.1	XM_023914632	89	1.23e-36	PREDICTED: Lactuca sativa protein SICKLE (LOC111919022), transcript variant X2, mRNA	--	--	--	--	Q9SB47	147	6.4e-08	Protein SICKLE OS=Arabidopsis thaliana OX=3702 GN=SIC PE=1 SV=1	--	--	--	--	--	--	--	--	--	--
Cluster-3377.0	--	--	--	--	--	--	--	--	--	--	--	--	--	--	--	--	--	--	--	--	--	--	--	--	--	--	--	--
Cluster-29767.20258	--	--	--	--	--	--	--	--	--	--	--	--	--	--	--	--	--	--	--	--	--	--	--	--	--	--	--	--
Cluster-577.0	--	--	--	--	--	--	--	--	--	--	--	--	--	--	--	--	--	--	--	--	--	--	--	--	--	--	--	--
Cluster-1856.0	--	--	--	--	--	XM_018389317.1	XM_018389317	511	0	Fusarium oxysporum f. sp. lycopersici 4287 hypothetical protein mRNA	--	--	--	--	--	--	--	--	--	--	--	--	--	--	--	--	--	--
Cluster-5681.0	--	--	--	--	--	--	--	--	--	--	--	--	--	--	--	--	--	--	--	--	--	--	--	--	--	--	--	--
Cluster-23206.0	--	--	--	--	--	--	--	--	--	--	--	--	--	--	--	--	--	--	--	--	--	--	--	--	--	--	--	--
Cluster-29767.106128	--	--	--	--	--	--	--	--	--	--	--	--	--	--	--	--	--	--	--	--	--	--	--	--	--	--	--	--
Cluster-7737.0	--	--	--	--	--	--	--	--	--	--	--	--	--	--	--	--	--	--	--	--	--	--	--	--	--	--	--	--
Cluster-29767.106126	--	--	--	--	--	--	--	--	--	--	--	--	--	--	--	--	--	--	--	--	--	--	--	--	--	--	--	--
Cluster-29767.62645	--	--	--	--	--	--	--	--	--	--	--	--	--	--	--	--	--	--	--	--	--	--	--	--	--	--	--	--
Cluster-29767.106124	--	--	--	--	--	XR_182894.4	XR_182894	34	1.2e-06	PREDICTED: Solanum lycopersicum uncharacterized LOC101254217 (LOC101254217), ncRNA	--	--	--	--	--	--	--	--	PF01921	tRNA synthetases class I (K)	GO:0009085//GO:0006430	lysine biosynthetic process//lysyl-tRNA aminoacylation	GO:0004824//GO:0005524//GO:0000166	lysine-tRNA ligase activity//ATP binding//nucleotide binding	GO:0005737	cytoplasm	--	--
Cluster-29767.106125	--	--	--	--	--	--	--	--	--	--	--	--	--	--	--	--	--	--	PF11051	Mannosyltransferase putative	GO:0006486	protein glycosylation	GO:0016757	transferase activity, transferring glycosyl groups	--	--	--	--
Cluster-29767.106122	--	--	--	--	--	--	--	--	--	--	--	--	--	--	--	--	--	--	--	--	--	--	--	--	--	--	--	--
Cluster-29767.106123	--	--	--	--	--	--	--	--	--	--	--	--	--	--	--	--	--	--	--	--	--	--	--	--	--	--	--	--
Cluster-29767.106120	1387812624	PWA77789.1	327	1e-27	hypothetical protein CTI12_AA218450 [Artemisia annua]	--	--	--	--	--	--	--	--	--	--	--	--	--	--	--	--	--	--	--	--	--	--	--
Cluster-29767.106121	1387830350	PWA93797.1	2155	1.6e-239	DNA helicase [Artemisia annua]	XM_022143699.1	XM_022143699	44	8.26e-12	PREDICTED: Helianthus annuus uncharacterized LOC110896235 (LOC110896235), mRNA	--	--	--	--	--	--	--	--	--	--	--	--	--	--	--	--	--	--
Cluster-29767.54213	--	--	--	--	--	--	--	--	--	--	--	--	--	--	--	--	--	--	--	--	--	--	--	--	--	--	--	--
Cluster-29767.54212	1322424621	PLY98835.1	1536	1.5e-167	hypothetical protein LSAT_7X20701 [Lactuca sativa]	XM_022181333.1	XM_022181333	562	0	PREDICTED: Helianthus annuus sugar carrier protein C-like (LOC110939767), mRNA	--	--	--	--	Q41144	1366	2.9e-149	Sugar carrier protein C OS=Ricinus communis OX=3988 GN=STC PE=2 SV=1	PF00083//PF07690	Sugar (and other) transporter//Major Facilitator Superfamily	GO:0055085	transmembrane transport	GO:0022857	transmembrane transporter activity	GO:0016021	integral component of membrane	--	--
Cluster-29767.54211	1387832239	PWA95563.1	646	6.4e-65	General substrate transporter [Artemisia annua]	XM_022181333.1	XM_022181333	262	2.21e-133	PREDICTED: Helianthus annuus sugar carrier protein C-like (LOC110939767), mRNA	--	--	--	--	Q41144	503	9.3e-50	Sugar carrier protein C OS=Ricinus communis OX=3988 GN=STC PE=2 SV=1	PF00083	Sugar (and other) transporter	GO:0055085	transmembrane transport	GO:0022857	transmembrane transporter activity	GO:0016021	integral component of membrane	--	--
Cluster-29767.54210	976909866	KVH96842.1	2289	5e-255	General substrate transporter [Cynara cardunculus var. scolymus]	XM_023888429.1	XM_023888429	798	0	PREDICTED: Lactuca sativa sugar carrier protein C-like (LOC111892381), mRNA	--	--	--	--	Q41144	2040	1.4e-227	Sugar carrier protein C OS=Ricinus communis OX=3988 GN=STC PE=2 SV=1	PF00083//PF07690	Sugar (and other) transporter//Major Facilitator Superfamily	GO:0055085	transmembrane transport	GO:0022857	transmembrane transporter activity	GO:0016021	integral component of membrane	--	--
Cluster-29767.54217	1387836303	PWA99415.1	1809	1.9e-199	hypothetical protein CTI12_AA009100 [Artemisia annua]	XM_020326126.1	XM_020326126	55	5.72e-18	PREDICTED: Aegilops tauschii subsp. tauschii uncharacterized mitochondrial protein AtMg00810-like (LOC109767363), mRNA	--	--	--	--	Q9ZT94	1058	8.8e-114	Retrovirus-related Pol polyprotein from transposon RE2 OS=Arabidopsis thaliana OX=3702 GN=RE2 PE=4 SV=1	--	--	--	--	--	--	--	--	--	--
Cluster-29767.54216	1387836860	PWA99952.1	1139	8.9e-122	ribonuclease H-like domain-containing protein [Artemisia annua]	LR031571.1	LR031571	38	1.53e-08	Brassica rapa genome, scaffold: A01	--	--	--	--	Q94HW2	468	2.2e-45	Retrovirus-related Pol polyprotein from transposon RE1 OS=Arabidopsis thaliana OX=3702 GN=RE1 PE=2 SV=1	PF00178//PF00665//PF13683	Ets-domain//Integrase core domain//Integrase core domain	GO:0015074//GO:0006355	DNA integration//regulation of transcription, DNA-templated	GO:0003700//GO:0043565	DNA-binding transcription factor activity//sequence-specific DNA binding	GO:0005667	transcription regulator complex	--	--
Cluster-29767.54215	--	--	--	--	--	--	--	--	--	--	--	--	--	--	--	--	--	--	--	--	--	--	--	--	--	--	--	--
Cluster-29767.54214	--	--	--	--	--	--	--	--	--	--	--	--	--	--	--	--	--	--	--	--	--	--	--	--	--	--	--	--
Cluster-29767.72086	--	--	--	--	--	KP332313.1	KP332313	42	1.36e-10	Chrysanthemum x morifolium microsatellite JH-473 sequence	--	--	--	--	--	--	--	--	--	--	--	--	--	--	--	--	--	--
Cluster-13957.0	--	--	--	--	--	--	--	--	--	--	--	--	--	--	--	--	--	--	--	--	--	--	--	--	--	--	--	--
Cluster-29767.72084	1340504044	XP_023732989.1	255	1.5e-19	F-box protein At5g03100-like [Lactuca sativa]	XM_023885238.1	XM_023885238	63	9.86e-23	PREDICTED: Lactuca sativa F-box/LRR-repeat protein At5g02910-like (LOC111889093), mRNA	--	--	--	--	--	--	--	--	--	--	--	--	--	--	--	--	--	--
Cluster-29767.72085	--	--	--	--	--	--	--	--	--	--	--	--	--	--	--	--	--	--	--	--	--	--	--	--	--	--	--	--
Cluster-29767.72082	1322375480	PLY74513.1	441	4.9e-41	hypothetical protein LSAT_7X24341 [Lactuca sativa]	--	--	--	--	--	--	--	--	--	Q9LYZ2	187	5.3e-13	Putative F-box/LRR-repeat protein At5g02930 OS=Arabidopsis thaliana OX=3702 GN=At5g02930 PE=4 SV=1	--	--	--	--	--	--	--	--	--	--
Cluster-29767.72083	--	--	--	--	--	--	--	--	--	--	--	--	--	--	--	--	--	--	--	--	--	--	--	--	--	--	--	--
Cluster-29767.72080	1322409100	PLY90979.1	251	2e-19	hypothetical protein LSAT_5X151640 [Lactuca sativa]	--	--	--	--	--	--	--	--	--	--	--	--	--	PF11571	Mediator complex subunit 27	--	--	--	--	GO:0016592	mediator complex	--	--
Cluster-29767.72081	1340504034	XP_023732984.1	318	5e-27	F-box/LRR-repeat protein 25-like isoform X1 [Lactuca sativa]	XM_023877076.1	XM_023877076	76	3.94e-30	PREDICTED: Lactuca sativa F-box protein At5g03100-like (LOC111880656), mRNA	--	--	--	--	--	--	--	--	--	--	--	--	--	--	--	--	--	--
Cluster-29767.71191	--	--	--	--	--	--	--	--	--	--	--	--	--	--	--	--	--	--	--	--	--	--	--	--	--	--	--	--
Cluster-29767.27153	--	--	--	--	--	KP332227.1	KP332227	129	1.5e-59	Chrysanthemum x morifolium microsatellite JH-386 sequence	--	--	--	--	--	--	--	--	--	--	--	--	--	--	--	--	--	--
Cluster-29767.71193	1389822755	XP_024976399.1	1648	7.1e-181	peroxisome biogenesis protein 5 [Cynara cardunculus var. scolymus]	XM_025120631.1	XM_025120631	741	0	PREDICTED: Cynara cardunculus var. scolymus peroxisome biogenesis protein 5 (LOC112514278), mRNA	K13342	PEX5, PXR1	peroxin-5	http://www.genome.jp/dbget-bin/www_bget?ko:K13342	Q9FMA3	1394	7.7e-153	Peroxisome biogenesis protein 5 OS=Arabidopsis thaliana OX=3702 GN=PEX5 PE=1 SV=1	PF00243//PF13181//PF13174//PF13176//PF01239//PF00515	Nerve growth factor family//Tetratricopeptide repeat//Tetratricopeptide repeat//Tetratricopeptide repeat//Protein prenyltransferase alpha subunit repeat//Tetratricopeptide repeat	GO:0007165//GO:0018342	signal transduction//protein prenylation	GO:0005515//GO:0008318//GO:0005102	protein binding//protein prenyltransferase activity//signaling receptor binding	--	--	KOG1125	TPR repeat-containing protein
Cluster-29767.71192	--	--	--	--	--	--	--	--	--	--	--	--	--	--	--	--	--	--	--	--	--	--	--	--	--	--	--	--
Cluster-29767.27156	--	--	--	--	--	--	--	--	--	--	--	--	--	--	--	--	--	--	--	--	--	--	--	--	--	--	--	--
Cluster-29767.27157	1387798373	PWA65643.1	487	7.4e-46	hypothetical protein CTI12_AA279380 [Artemisia annua]	--	--	--	--	--	K09527	DNAJC7	DnaJ homolog subfamily C member 7	http://www.genome.jp/dbget-bin/www_bget?ko:K09527	--	--	--	--	--	--	--	--	--	--	--	--	--	--
Cluster-29767.71197	--	--	--	--	--	--	--	--	--	--	--	--	--	--	--	--	--	--	--	--	--	--	--	--	--	--	--	--
Cluster-29767.27155	--	--	--	--	--	--	--	--	--	--	--	--	--	--	--	--	--	--	--	--	--	--	--	--	--	--	--	--
Cluster-29767.71199	1387788472	PWA57664.1	528	1.4e-51	cysteine-rich receptor-like protein kinase 2 [Artemisia annua]	XM_023877952.1	XM_023877952	136	1.04e-63	PREDICTED: Lactuca sativa cysteine-rich receptor-like protein kinase 2 (LOC111881555), mRNA	--	--	--	--	Q9CAL3	292	1.2e-25	Cysteine-rich receptor-like protein kinase 2 OS=Arabidopsis thaliana OX=3702 GN=CRK2 PE=1 SV=1	PF07714//PF00069	Protein tyrosine and serine/threonine kinase//Protein kinase domain	GO:0006468	protein phosphorylation	GO:0005524//GO:0004672	ATP binding//protein kinase activity	--	--	--	--
Cluster-29767.71198	--	--	--	--	--	--	--	--	--	--	--	--	--	--	--	--	--	--	--	--	--	--	--	--	--	--	--	--
Cluster-29767.27158	1387763641	PWA40492.1	2482	2.1e-277	flavonoid 3'-hydroxylase cytochrome P450 [Artemisia annua]	DQ363131.1	DQ363131	1435	0	Artemisia annua putative flavonoid 3'-hydroxylase cytochrome P450 mRNA, complete cds	--	--	--	--	O64636	786	3.7e-82	Cytochrome P450 76C1 OS=Arabidopsis thaliana OX=3702 GN=CYP76C1 PE=2 SV=1	PF00067	Cytochrome P450	GO:0055114	oxidation-reduction process	GO:0020037//GO:0016705//GO:0005506	heme binding//oxidoreductase activity, acting on paired donors, with incorporation or reduction of molecular oxygen//iron ion binding	--	--	--	--
Cluster-29767.27159	--	--	--	--	--	--	--	--	--	--	--	--	--	--	--	--	--	--	--	--	--	--	--	--	--	--	--	--
Cluster-14671.1	--	--	--	--	--	--	--	--	--	--	--	--	--	--	--	--	--	--	--	--	--	--	--	--	--	--	--	--
Cluster-29767.92300	--	--	--	--	--	--	--	--	--	--	--	--	--	--	--	--	--	--	--	--	--	--	--	--	--	--	--	--
Cluster-29767.32958	--	--	--	--	--	--	--	--	--	--	--	--	--	--	--	--	--	--	--	--	--	--	--	--	--	--	--	--
Cluster-29767.96319	1387783128	PWA53583.1	149	2.7e-07	hypothetical protein CTI12_AA443610 [Artemisia annua]	--	--	--	--	--	--	--	--	--	--	--	--	--	--	--	--	--	--	--	--	--	--	--
Cluster-29764.0	1150123649	XP_020209314.1	479	1.1e-45	uncharacterized protein LOC109794262 [Cajanus cajan]	LC219381.1	LC219381	362	0	Dioscorea rotundata mitochondrial DNA, contig: TDr_Mt_scaffold8_size9540, cultivar: TDr96_F1	--	--	--	--	P17492	201	6.9e-15	Replication protein OS=Neisseria gonorrhoeae OX=485 PE=3 SV=1	PF01051	Initiator Replication protein	GO:0006260//GO:0006270	DNA replication//DNA replication initiation	GO:0003887	DNA-directed DNA polymerase activity	GO:0042575	DNA polymerase complex	--	--
Cluster-29767.32955	--	--	--	--	--	--	--	--	--	--	--	--	--	--	--	--	--	--	--	--	--	--	--	--	--	--	--	--
Cluster-29767.32956	--	--	--	--	--	--	--	--	--	--	--	--	--	--	--	--	--	--	--	--	--	--	--	--	--	--	--	--
Cluster-29767.32957	--	--	--	--	--	--	--	--	--	--	--	--	--	--	--	--	--	--	--	--	--	--	--	--	--	--	--	--
Cluster-29767.96310	--	--	--	--	--	--	--	--	--	--	--	--	--	--	--	--	--	--	PF01106	NifU-like domain	GO:0016226	iron-sulfur cluster assembly	GO:0051536//GO:0005506	iron-sulfur cluster binding//iron ion binding	--	--	--	--
Cluster-29767.32951	1387793521	PWA61662.1	843	4e-87	hypothetical protein CTI12_AA371060 [Artemisia annua]	XM_018581072.1	XM_018581072	54	4.21e-17	PREDICTED: Raphanus sativus target of Myb protein 1 (LOC108808956), mRNA	--	--	--	--	Q9LPL6	459	5.1e-44	TOM1-like protein 3 OS=Arabidopsis thaliana OX=3702 GN=TOL3 PE=1 SV=1	PF01660//PF00790//PF03127	Viral methyltransferase//VHS domain//GAT domain	GO:0006396//GO:0006886//GO:0080009//GO:0009451	RNA processing//intracellular protein transport//mRNA methylation//RNA modification	GO:0003723//GO:0008174	RNA binding//mRNA methyltransferase activity	--	--	--	--
Cluster-29767.96312	--	--	--	--	--	--	--	--	--	--	--	--	--	--	--	--	--	--	--	--	--	--	--	--	--	--	--	--
Cluster-3175.0	--	--	--	--	--	--	--	--	--	--	--	--	--	--	--	--	--	--	--	--	--	--	--	--	--	--	--	--
Cluster-29767.20870	--	--	--	--	--	--	--	--	--	--	--	--	--	--	--	--	--	--	--	--	--	--	--	--	--	--	--	--
Cluster-29767.20871	1387778781	PWA50416.1	158	2.8e-08	ABC transporter ABCE, Iron-sulfur binding protein LdpA [Artemisia annua]	--	--	--	--	--	--	--	--	--	--	--	--	--	PF01103	Omp85 superfamily domain	--	--	--	--	GO:0019867	outer membrane	--	--
Cluster-29767.20872	1387758769	PWA37990.1	598	3.4e-59	phosphatidylinositol-4-phosphate 5-kinase family protein [Artemisia annua]	XM_022134232.1	XM_022134232	199	3.39e-98	PREDICTED: Helianthus annuus 1-phosphatidylinositol-3-phosphate 5-kinase FAB1B-like (LOC110886441), transcript variant X2, mRNA	K00921	PIKFYVE, FAB1	1-phosphatidylinositol-3-phosphate 5-kinase	http://www.genome.jp/dbget-bin/www_bget?ko:K00921	Q9LUM0	443	1.2e-42	1-phosphatidylinositol-3-phosphate 5-kinase FAB1B OS=Arabidopsis thaliana OX=3702 GN=FAB1B PE=2 SV=1	PF01504	Phosphatidylinositol-4-phosphate 5-Kinase	GO:0046488	phosphatidylinositol metabolic process	GO:0016307	phosphatidylinositol phosphate kinase activity	--	--	KOG0230	Phosphatidylinositol-4-phosphate 5-kinase and related FYVE finger-containing proteins
Cluster-29767.20873	1387753772	PWA35939.1	162	7.2e-09	nucleotide-binding alpha-beta plait domain-containing protein [Artemisia annua]	--	--	--	--	--	--	--	--	--	--	--	--	--	PF00076	RNA recognition motif. (a.k.a. RRM, RBD, or RNP domain)	--	--	GO:0003676	nucleic acid binding	--	--	--	--
Cluster-29767.20874	1389825055	XP_024977638.1	3247	0	ABC transporter G family member 29-like [Cynara cardunculus var. scolymus]	XM_025121870.1	XM_025121870	1217	0	PREDICTED: Cynara cardunculus var. scolymus ABC transporter G family member 29-like (LOC112515199), mRNA	--	--	--	--	Q7PC86	2499	1.4e-280	ABC transporter G family member 35 OS=Arabidopsis thaliana OX=3702 GN=ABCG35 PE=2 SV=1	PF10662//PF00005//PF03266//PF00004//PF05496//PF00069//PF01061//PF13304	Ethanolamine utilisation - propanediol utilisation//ABC transporter//NTPase//ATPase family associated with various cellular activities (AAA)//Holliday junction DNA helicase RuvB P-loop domain//Protein kinase domain//ABC-2 type transporter//AAA domain, putative AbiEii toxin, Type IV TA system	GO:0006281//GO:0006576//GO:0006468//GO:0006310	DNA repair//cellular biogenic amine metabolic process//protein phosphorylation//DNA recombination	GO:0005524//GO:0004672//GO:0098519//GO:0016887//GO:0009378	ATP binding//protein kinase activity//nucleotide phosphatase activity, acting on free nucleotides//ATPase activity//four-way junction helicase activity	GO:0005657//GO:0009379//GO:0016020	replication fork//Holliday junction helicase complex//membrane	--	--
Cluster-29767.20875	1387825439	PWA89264.1	210	4.5e-14	AAA-type ATPase family protein [Artemisia annua]	KX161381.1	KX161381	86	3.01e-35	Chrysanthemum lavandulifolium flower asymmetry transporter ClCYC2c mRNA, complete cds	--	--	--	--	A8MPR5	156	3.1e-09	Probable inactive ATP-dependent zinc metalloprotease FTSHI 2, chloroplastic OS=Arabidopsis thaliana OX=3702 GN=FTSHI2 PE=1 SV=1	PF01434//PF00962//PF00759	Peptidase family M41//Adenosine/AMP deaminase//Glycosyl hydrolase family 9	GO:0005975//GO:0006508	carbohydrate metabolic process//proteolysis	GO:0004553//GO:0004222//GO:0005524//GO:0019239	hydrolase activity, hydrolyzing O-glycosyl compounds//metalloendopeptidase activity//ATP binding//deaminase activity	--	--	--	--
Cluster-29767.20876	1387789977	PWA58849.1	146	5.2e-07	STAS domain-containing protein [Artemisia annua]	--	--	--	--	--	--	--	--	--	--	--	--	--	--	--	--	--	--	--	--	--	--	--
Cluster-29767.20877	1387820150	PWA84465.1	164	9.2e-09	Pentatricopeptide repeat-containing protein [Artemisia annua]	--	--	--	--	--	--	--	--	--	--	--	--	--	--	--	--	--	--	--	--	--	--	--
Cluster-29767.20878	1387825439	PWA89264.1	170	1.6e-09	AAA-type ATPase family protein [Artemisia annua]	XM_004305217.2	XM_004305217	51	6.95e-16	PREDICTED: Fragaria vesca subsp. vesca uncharacterized LOC101310245 (LOC101310245), mRNA	--	--	--	--	A8MPR5	125	9.9e-06	Probable inactive ATP-dependent zinc metalloprotease FTSHI 2, chloroplastic OS=Arabidopsis thaliana OX=3702 GN=FTSHI2 PE=1 SV=1	--	--	--	--	--	--	--	--	--	--
Cluster-29767.20879	1387811418	PWA76738.1	498	1.4e-47	nucleotide-binding alpha-beta plait domain-containing protein [Artemisia annua]	--	--	--	--	--	K05290	PIGK	phosphatidylinositol glycan, class K	http://www.genome.jp/dbget-bin/www_bget?ko:K05290	P49018	147	2.6e-08	GPI-anchor transamidase OS=Saccharomyces cerevisiae (strain ATCC 204508 / S288c) OX=559292 GN=GPI8 PE=1 SV=1	PF00616	GTPase-activator protein for Ras-like GTPase	GO:0043087	regulation of GTPase activity	--	--	--	--	KOG1349	Gpi-anchor transamidase
Cluster-29767.10506	--	--	--	--	--	--	--	--	--	--	--	--	--	--	--	--	--	--	PF00895	ATP synthase protein 8	GO:0015986	ATP synthesis coupled proton transport	GO:0015078	proton transmembrane transporter activity	GO:0000276	mitochondrial proton-transporting ATP synthase complex, coupling factor F(o)	--	--
Cluster-29767.30556	1387804080	PWA70417.1	1966	1.1e-217	NBS-LRR resistance-like protein [Artemisia annua]	XR_002851893.1	XR_002851893	290	1.22e-148	PREDICTED: Lactuca sativa probable methyltransferase PMT3 (LOC111896426), transcript variant X1, misc_RNA	--	--	--	--	Q9LRR4	689	5e-71	Putative disease resistance RPP13-like protein 1 OS=Arabidopsis thaliana OX=3702 GN=RPPL1 PE=3 SV=1	PF13516//PF13855//PF00931//PF00560	Leucine Rich repeat//Leucine rich repeat//NB-ARC domain//Leucine Rich Repeat	--	--	GO:0005515//GO:0043531	protein binding//ADP binding	--	--	--	--
Cluster-29767.30557	--	--	--	--	--	--	--	--	--	--	--	--	--	--	--	--	--	--	--	--	--	--	--	--	--	--	--	--
Cluster-29767.26283	--	--	--	--	--	--	--	--	--	--	--	--	--	--	--	--	--	--	--	--	--	--	--	--	--	--	--	--
Cluster-29767.26282	1387836793	PWA99887.1	141	1.9e-06	F-box domain, Leucine-rich repeat domain, L domain-like protein [Artemisia annua]	--	--	--	--	--	K14515	EBF1_2	EIN3-binding F-box protein	http://www.genome.jp/dbget-bin/www_bget?ko:K14515	--	--	--	--	--	--	--	--	--	--	--	--	--	--
Cluster-29767.26285	--	--	--	--	--	JX142413.1	JX142413	283	5.55e-145	Artemisia annua C4-sterol methyl oxidase gene, promoter region	--	--	--	--	--	--	--	--	--	--	--	--	--	--	--	--	--	--
Cluster-29767.30553	--	--	--	--	--	--	--	--	--	--	--	--	--	--	--	--	--	--	--	--	--	--	--	--	--	--	--	--
Cluster-29767.26287	1387813815	PWA78841.1	290	1.2e-23	Homeodomain-like protein [Artemisia annua]	--	--	--	--	--	--	--	--	--	--	--	--	--	--	--	--	--	--	--	--	--	--	--
Cluster-29767.30551	1387792995	PWA61238.1	460	1e-43	toll/interleukin-1 receptor (TIR) domain-containing protein [Artemisia annua]	XM_023885800.1	XM_023885800	150	1.64e-71	PREDICTED: Lactuca sativa TMV resistance protein N-like (LOC111889661), mRNA	--	--	--	--	A0A290U7C4	239	1.6e-19	Disease resistance protein Roq1 OS=Nicotiana benthamiana OX=4100 GN=ROQ1 PE=1 SV=1	PF00931	NB-ARC domain	--	--	GO:0043531	ADP binding	--	--	--	--
Cluster-29767.26289	--	--	--	--	--	--	--	--	--	--	--	--	--	--	--	--	--	--	--	--	--	--	--	--	--	--	--	--
Cluster-29767.26288	1387836360	PWA99469.1	247	2.6e-18	transcription factor jumonji (jmj) family protein / zinc finger (C5HC2 type) family protein [Artemisia annua]	--	--	--	--	--	K11446	KDM5, JARID1	histone demethylase JARID1	http://www.genome.jp/dbget-bin/www_bget?ko:K11446	--	--	--	--	PF01972	Serine dehydrogenase proteinase	--	--	--	--	GO:0016021	integral component of membrane	--	--
Cluster-29767.30558	1387818186	PWA82716.1	174	2.1e-10	Homeodomain-like protein [Artemisia annua]	XM_025132009.1	XM_025132009	58	3.41e-20	PREDICTED: Cynara cardunculus var. scolymus transcription factor MYB124-like (LOC112522714), transcript variant X2, mRNA	--	--	--	--	--	--	--	--	--	--	--	--	--	--	--	--	--	--
Cluster-29767.30559	--	--	--	--	--	--	--	--	--	--	--	--	--	--	--	--	--	--	--	--	--	--	--	--	--	--	--	--
Cluster-7525.0	1387766530	PWA42185.1	876	1.3e-91	Protein kinase, ATP binding site-containing protein [Artemisia annua]	XM_023889082.1	XM_023889082	94	5.36e-40	PREDICTED: Lactuca sativa probable serine/threonine-protein kinase PBL1 (LOC111893007), mRNA	K04733	IRAK4	interleukin-1 receptor-associated kinase 4	http://www.genome.jp/dbget-bin/www_bget?ko:K04733	Q9SF86	411	4.2e-39	Serine/threonine-protein kinase PCRK1 OS=Arabidopsis thaliana OX=3702 GN=PCRK1 PE=1 SV=1	PF07714//PF00069	Protein tyrosine and serine/threonine kinase//Protein kinase domain	GO:0006468	protein phosphorylation	GO:0005524//GO:0004672	ATP binding//protein kinase activity	--	--	--	--
Cluster-2109.0	--	--	--	--	--	XM_018376352.1	XM_018376352	305	1.17e-157	Fusarium oxysporum f. sp. lycopersici 4287 glucosamine-fructose-6-phosphate aminotransferase mRNA	--	--	--	--	--	--	--	--	--	--	--	--	--	--	--	--	--	--
Cluster-32156.0	--	--	--	--	--	--	--	--	--	--	--	--	--	--	--	--	--	--	--	--	--	--	--	--	--	--	--	--
Cluster-21262.0	--	--	--	--	--	--	--	--	--	--	--	--	--	--	--	--	--	--	--	--	--	--	--	--	--	--	--	--
Cluster-8415.0	1573252576	RZC57806.1	222	4.1e-16	hypothetical protein C5167_005110 [Papaver somniferum]	--	--	--	--	--	K12815	DHX38, PRP16	pre-mRNA-splicing factor ATP-dependent RNA helicase DHX38/PRP16	http://www.genome.jp/dbget-bin/www_bget?ko:K12815	F4K2E9	211	3e-16	Pre-mRNA-splicing factor ATP-dependent RNA helicase DEAH7 OS=Arabidopsis thaliana OX=3702 GN=CUV PE=1 SV=1	--	--	--	--	--	--	--	--	KOG0924	mRNA splicing factor ATP-dependent RNA helicase
Cluster-18074.0	1228911896	XP_022007380.1	536	1.9e-52	uncharacterized protein LOC110906577 [Helianthus annuus]	XM_022174705.1	XM_022174705	132	2.01e-61	PREDICTED: Helianthus annuus uncharacterized LOC110931306 (LOC110931306), mRNA	--	--	--	--	--	--	--	--	--	--	--	--	--	--	--	--	--	--
Cluster-25911.0	1344045343	XP_023902706.1	1138	1.2e-121	thiamine thiazole synthase-like [Quercus suber]	XM_018389761.1	XM_018389761	1154	0	Fusarium oxysporum f. sp. lycopersici 4287 thiamine biosynthetic enzyme mRNA	K03146	THI4, THI1	thiamine thiazole synthase	http://www.genome.jp/dbget-bin/www_bget?ko:K03146	J9N5G7	1418	1.5e-155	Thiamine thiazole synthase OS=Fusarium oxysporum f. sp. lycopersici (strain 4287 / CBS 123668 / FGSC 9935 / NRRL 34936) OX=426428 GN=sti35 PE=3 SV=1	PF01266//PF01494//PF07992	FAD dependent oxidoreductase//FAD binding domain//Pyridine nucleotide-disulphide oxidoreductase	GO:0055114	oxidation-reduction process	GO:0016491//GO:0071949	oxidoreductase activity//FAD binding	--	--	KOG2960	Protein involved in thiamine biosynthesis and DNA damage tolerance
Cluster-29767.47138	1387789985	PWA58855.1	222	1.4e-15	choline kinase 1 [Artemisia annua]	--	--	--	--	--	K14156	CHK	choline/ethanolamine kinase	http://www.genome.jp/dbget-bin/www_bget?ko:K14156	Q9SZ92	182	2.4e-12	Probable choline kinase 3 OS=Arabidopsis thaliana OX=3702 GN=At4g09760 PE=2 SV=1	--	--	--	--	--	--	--	--	--	--
Cluster-29767.39832	1387780891	PWA51955.1	240	6e-18	cellulose-synthase-like C4 [Artemisia annua]	XM_023887917.1	XM_023887917	103	4.19e-45	PREDICTED: Lactuca sativa xyloglucan glycosyltransferase 4-like (LOC111891854), mRNA	K20887	CSLC4	xyloglucan glycosyltransferase 4	http://www.genome.jp/dbget-bin/www_bget?ko:K20887	Q9LJP4	222	2.8e-17	Xyloglucan glycosyltransferase 4 OS=Arabidopsis thaliana OX=3702 GN=CSLC4 PE=1 SV=1	--	--	--	--	--	--	--	--	--	--
Cluster-29767.13129	--	--	--	--	--	--	--	--	--	--	--	--	--	--	--	--	--	--	--	--	--	--	--	--	--	--	--	--
Cluster-29767.39833	--	--	--	--	--	--	--	--	--	--	--	--	--	--	--	--	--	--	--	--	--	--	--	--	--	--	--	--
Cluster-11722.0	--	--	--	--	--	--	--	--	--	--	--	--	--	--	--	--	--	--	--	--	--	--	--	--	--	--	--	--
Cluster-29767.39830	1387785787	PWA55592.1	1664	1.1e-182	Disease resistance protein [Artemisia annua]	XM_025134950.1	XM_025134950	272	1.21e-138	PREDICTED: Cynara cardunculus var. scolymus putative late blight resistance protein homolog R1A-10 (LOC112525003), mRNA	--	--	--	--	Q6L403	603	4.5e-61	Putative late blight resistance protein homolog R1B-17 OS=Solanum demissum OX=50514 GN=R1B-17 PE=3 SV=1	PF13855//PF00931//PF09317//PF00560	Leucine rich repeat//NB-ARC domain//Domain of unknown function (DUF1974)//Leucine Rich Repeat	GO:0055114//GO:0033539//GO:0006118	oxidation-reduction process//fatty acid beta-oxidation using acyl-CoA dehydrogenase//obsolete electron transport	GO:0043531//GO:0003995//GO:0005515	ADP binding//acyl-CoA dehydrogenase activity//protein binding	--	--	--	--
Cluster-29767.62190	1387825177	PWA89024.1	4541	0	DnaJ domain-containing protein [Artemisia annua]	XM_025121824.1	XM_025121824	336	9.03e-174	PREDICTED: Cynara cardunculus var. scolymus uncharacterized LOC112515146 (LOC112515146), mRNA	--	--	--	--	Q17438	184	4.9e-12	DnaJ homolog subfamily B member 1 OS=Caenorhabditis elegans OX=6239 GN=dnj-1 PE=1 SV=1	--	--	--	--	--	--	--	--	--	--
Cluster-5144.0	1344072019	XP_023919812.1	335	3.3e-29	eukaryotic translation initiation factor 3 subunit I-like [Quercus suber]	XM_018419079.1	XM_018419079	169	4.65e-82	Rhodotorula graminis WP1 hypothetical protein mRNA	K03246	EIF3I	translation initiation factor 3 subunit I	http://www.genome.jp/dbget-bin/www_bget?ko:K03246	E3LB80	420	1.7e-40	Eukaryotic translation initiation factor 3 subunit I OS=Puccinia graminis f. sp. tritici (strain CRL 75-36-700-3 / race SCCL) OX=418459 GN=TIF34 PE=3 SV=2	PF00400	WD domain, G-beta repeat	--	--	GO:0005515	protein binding	--	--	KOG0643	Translation initiation factor 3, subunit i (eIF-3i)/TGF-beta receptor-interacting protein (TRIP-1)
Cluster-10007.0	--	--	--	--	--	--	--	--	--	--	--	--	--	--	--	--	--	--	--	--	--	--	--	--	--	--	--	--
Cluster-29767.60055	1387836337	PWA99447.1	3275	0	chaperonin Cpn60/TCP-1 family [Artemisia annua]	XM_022164940.1	XM_022164940	541	0	PREDICTED: Helianthus annuus putative 1-phosphatidylinositol-3-phosphate 5-kinase FAB1C (LOC110920741), mRNA	K00921	PIKFYVE, FAB1	1-phosphatidylinositol-3-phosphate 5-kinase	http://www.genome.jp/dbget-bin/www_bget?ko:K00921	Q9SSJ8	1691	8.3e-187	Putative 1-phosphatidylinositol-3-phosphate 5-kinase FAB1C OS=Arabidopsis thaliana OX=3702 GN=FAB1C PE=2 SV=1	PF01504//PF01363	Phosphatidylinositol-4-phosphate 5-Kinase//FYVE zinc finger	GO:0046488	phosphatidylinositol metabolic process	GO:0016307//GO:0046872	phosphatidylinositol phosphate kinase activity//metal ion binding	--	--	KOG0230	Phosphatidylinositol-4-phosphate 5-kinase and related FYVE finger-containing proteins
Cluster-29767.100467	--	--	--	--	--	--	--	--	--	--	--	--	--	--	--	--	--	--	--	--	--	--	--	--	--	--	--	--
Cluster-29767.60052	1387767890	PWA43038.1	571	5e-56	toll/interleukin-1 receptor (TIR) domain-containing protein [Artemisia annua]	XM_022871057.1	XM_022871057	36	1.52e-07	PREDICTED: Durio zibethinus D-cysteine desulfhydrase 2, mitochondrial-like (LOC111282800), transcript variant X3, mRNA	--	--	--	--	Q40392	161	6.6e-10	TMV resistance protein N OS=Nicotiana glutinosa OX=35889 GN=N PE=1 SV=1	PF13855//PF13516//PF00560	Leucine rich repeat//Leucine Rich repeat//Leucine Rich Repeat	--	--	GO:0005515	protein binding	--	--	--	--
Cluster-31705.0	--	--	--	--	--	--	--	--	--	--	--	--	--	--	--	--	--	--	--	--	--	--	--	--	--	--	--	--
Cluster-29767.60880	1387782366	PWA53031.1	2201	8.2e-245	Bromodomain-containing protein [Artemisia annua]	XM_021832483.1	XM_021832483	112	1.46e-49	PREDICTED: Hevea brasiliensis transcription factor GTE4-like (LOC110670436), mRNA	--	--	--	--	Q9LNC4	774	9.2e-81	Transcription factor GTE4 OS=Arabidopsis thaliana OX=3702 GN=GTE4 PE=2 SV=1	PF05427//PF00439	Acidic fibroblast growth factor binding (FIBP)//Bromodomain	--	--	GO:0005515//GO:0017134	protein binding//fibroblast growth factor binding	--	--	--	--
Cluster-17991.1	--	--	--	--	--	KP334054.1	KP334054	42	2.65e-11	Chrysanthemum x morifolium microsatellite JH-2226 sequence	--	--	--	--	--	--	--	--	--	--	--	--	--	--	--	--	--	--
Cluster-17991.0	--	--	--	--	--	--	--	--	--	--	--	--	--	--	--	--	--	--	--	--	--	--	--	--	--	--	--	--
Cluster-29767.7774	1387788479	PWA57670.1	213	2.2e-14	serine/threonine protein phosphatase, BSU1, Metallo-dependent phosphatase-like protein [Artemisia annua]	--	--	--	--	--	--	--	--	--	--	--	--	--	--	--	--	--	--	--	--	--	--	--
Cluster-29767.26167	1387763171	PWA40224.1	664	5.6e-67	zinc finger, PHD-type [Artemisia annua]	--	--	--	--	--	--	--	--	--	--	--	--	--	PF00130//PF12678	Phorbol esters/diacylglycerol binding domain (C1 domain)//RING-H2 zinc finger domain	GO:0035556	intracellular signal transduction	GO:0008270	zinc ion binding	--	--	--	--
Cluster-29767.49370	1387810337	PWA75784.1	774	9.9e-80	cell division cycle 48C [Artemisia annua]	XM_023876388.1	XM_023876388	268	1.1e-136	PREDICTED: Lactuca sativa cell division control protein 48 homolog C-like (LOC111879963), mRNA	K14571	RIX7, NVL	ribosome biogenesis ATPase	http://www.genome.jp/dbget-bin/www_bget?ko:K14571	Q9SS94	544	1.8e-54	Cell division control protein 48 homolog C OS=Arabidopsis thaliana OX=3702 GN=CDC48C PE=2 SV=2	PF00004	ATPase family associated with various cellular activities (AAA)	--	--	GO:0005524	ATP binding	--	--	KOG0733	Nuclear AAA ATPase (VCP subfamily)
Cluster-29767.79845	1387789744	PWA58667.1	160	1.1e-08	beta glucosidase 41 [Artemisia annua]	--	--	--	--	--	K01188	E3.2.1.21	beta-glucosidase	http://www.genome.jp/dbget-bin/www_bget?ko:K01188	--	--	--	--	--	--	--	--	--	--	--	--	--	--
Cluster-11909.0	--	--	--	--	--	--	--	--	--	--	--	--	--	--	--	--	--	--	--	--	--	--	--	--	--	--	--	--
Cluster-29767.39835	1387818415	PWA82919.1	286	7e-23	phospholipase D gamma 1 [Artemisia annua]	XM_023916338.1	XM_023916338	51	8.8e-16	PREDICTED: Lactuca sativa phospholipase D beta 1-like (LOC111920777), mRNA	--	--	--	--	Q9T051	213	7.8e-16	Phospholipase D gamma 2 OS=Arabidopsis thaliana OX=3702 GN=PLDGAMMA2 PE=1 SV=3	--	--	--	--	--	--	--	--	--	--
Cluster-29767.29567	--	--	--	--	--	--	--	--	--	--	--	--	--	--	--	--	--	--	--	--	--	--	--	--	--	--	--	--
Cluster-29767.60856	1387799020	PWA66194.1	155	4.8e-08	dnaJ domain-containing protein [Artemisia annua]	XM_022169964.1	XM_022169964	42	3.79e-11	PREDICTED: Helianthus annuus dnaJ homolog subfamily B member 3-like (LOC110926210), mRNA	--	--	--	--	--	--	--	--	--	--	--	--	--	--	--	--	--	--
Cluster-29767.60857	1387800151	PWA67132.1	206	1.4e-13	hypothetical protein CTI12_AA320900 [Artemisia annua]	--	--	--	--	--	--	--	--	--	--	--	--	--	--	--	--	--	--	--	--	--	--	--
Cluster-29767.60854	1387774288	PWA47268.1	217	6.2e-15	ribosomal protein L9/RNase H1 [Artemisia annua]	XM_025106901.1	XM_025106901	97	2.08e-41	PREDICTED: Cynara cardunculus var. scolymus uncharacterized LOC112502885 (LOC112502885), mRNA	--	--	--	--	--	--	--	--	--	--	--	--	--	--	--	--	--	--
Cluster-29767.60855	1387764615	PWA41058.1	2807	0	polynucleotide adenylyltransferase family protein [Artemisia annua]	XM_022157268.1	XM_022157268	811	0	PREDICTED: Helianthus annuus putative CCA tRNA nucleotidyltransferase 2 (LOC110912532), transcript variant X3, mRNA	--	--	--	--	Q93XX5	931	1.3e-98	PI-PLC X domain-containing protein At5g67130 OS=Arabidopsis thaliana OX=3702 GN=At5g67130 PE=1 SV=1	PF14528//PF09478//PF01743	LAGLIDADG-like domain//Carbohydrate binding domain CBM49//Poly A polymerase head domain	GO:0006396	RNA processing	GO:0003723//GO:0016779//GO:0030246//GO:0004519	RNA binding//nucleotidyltransferase activity//carbohydrate binding//endonuclease activity	--	--	KOG2159	tRNA nucleotidyltransferase/poly(A) polymerase
Cluster-29767.60852	1387832596	PWA95898.1	1661	2.3e-182	heme peroxidase [Artemisia annua]	XM_010682923.2	XM_010682923	51	8.05e-16	PREDICTED: Beta vulgaris subsp. vulgaris peroxidase 12 (LOC104896205), mRNA	K00430	E1.11.1.7	peroxidase	http://www.genome.jp/dbget-bin/www_bget?ko:K00430	Q96520	936	1e-99	Peroxidase 12 OS=Arabidopsis thaliana OX=3702 GN=PER12 PE=1 SV=1	PF00141	Peroxidase	GO:0006979//GO:0055114//GO:0006804	response to oxidative stress//oxidation-reduction process//obsolete peroxidase reaction	GO:0020037//GO:0004601	heme binding//peroxidase activity	--	--	--	--
Cluster-29767.60853	--	--	--	--	--	--	--	--	--	--	--	--	--	--	--	--	--	--	--	--	--	--	--	--	--	--	--	--
Cluster-29767.60850	--	--	--	--	--	--	--	--	--	--	--	--	--	--	--	--	--	--	--	--	--	--	--	--	--	--	--	--
Cluster-29767.60851	1585748952	XP_028070195.1	219	1.4e-15	40S ribosomal protein S3a-2-like [Camellia sinensis]	XM_025138932.1	XM_025138932	84	1.34e-34	PREDICTED: Cynara cardunculus var. scolymus 40S ribosomal protein S3a (LOC112528043), mRNA	K02984	RP-S3Ae, RPS3A	small subunit ribosomal protein S3Ae	http://www.genome.jp/dbget-bin/www_bget?ko:K02984	A7Q5X9	216	1.2e-16	40S ribosomal protein S3a-2 OS=Vitis vinifera OX=29760 GN=GSVIVT00031140001 PE=3 SV=1	PF01015	Ribosomal S3Ae family	GO:0042254//GO:0006412	ribosome biogenesis//translation	GO:0003735	structural constituent of ribosome	GO:0005840	ribosome	KOG1628	40S ribosomal protein S3A
Cluster-24467.0	--	--	--	--	--	--	--	--	--	--	--	--	--	--	--	--	--	--	--	--	--	--	--	--	--	--	--	--
Cluster-29767.60858	--	--	--	--	--	--	--	--	--	--	--	--	--	--	--	--	--	--	--	--	--	--	--	--	--	--	--	--
Cluster-29767.60859	1389789753	XP_024993606.1	173	2.7e-10	luminal-binding protein [Cynara cardunculus var. scolymus]	XM_021919278.1	XM_021919278	69	2.47e-26	PREDICTED: Chenopodium quinoa luminal-binding protein (LOC110738839), mRNA	K09490	HSPA5, BIP	heat shock 70kDa protein 5	http://www.genome.jp/dbget-bin/www_bget?ko:K09490	Q39043	168	3.8e-11	Heat shock 70 kDa protein BIP2 OS=Arabidopsis thaliana OX=3702 GN=BIP2 PE=1 SV=2	--	--	--	--	--	--	--	--	KOG0100	Molecular chaperones GRP78/BiP/KAR2, HSP70 superfamily
Cluster-29767.97043	--	--	--	--	--	--	--	--	--	--	--	--	--	--	--	--	--	--	--	--	--	--	--	--	--	--	--	--
Cluster-29767.33602	1389765983	XP_024985887.1	1949	2.4e-215	glucan endo-1,3-beta-glucosidase 4 [Cynara cardunculus var. scolymus]	XM_004502150.3	XM_004502150	112	2.54e-49	PREDICTED: Cicer arietinum glucan endo-1,3-beta-glucosidase 4-like (LOC101507827), mRNA	K19892	GN4	glucan endo-1,3-beta-glucosidase 4	http://www.genome.jp/dbget-bin/www_bget?ko:K19892	Q94CD8	1534	1.2e-168	Glucan endo-1,3-beta-glucosidase 4 OS=Arabidopsis thaliana OX=3702 GN=At3g13560 PE=2 SV=1	PF00332	Glycosyl hydrolases family 17	GO:0005975	carbohydrate metabolic process	GO:0004553	hydrolase activity, hydrolyzing O-glycosyl compounds	--	--	--	--
Cluster-29767.97041	1387823146	PWA87177.1	811	5.4e-84	transposase, MuDR, MULE transposase domain protein [Artemisia annua]	KP332248.1	KP332248	98	3.73e-42	Chrysanthemum x morifolium microsatellite JH-407 sequence	--	--	--	--	--	--	--	--	--	--	--	--	--	--	--	--	--	--
Cluster-29767.33600	--	--	--	--	--	--	--	--	--	--	--	--	--	--	--	--	--	--	--	--	--	--	--	--	--	--	--	--
Cluster-24536.0	1387781964	PWA52734.1	462	1.9e-43	reverse transcriptase zinc-binding domain-containing protein [Artemisia annua]	--	--	--	--	--	--	--	--	--	--	--	--	--	--	--	--	--	--	--	--	--	--	--
Cluster-29767.97046	1387799483	PWA66575.1	731	3.5e-74	hypothetical protein CTI12_AA284100 [Artemisia annua]	XM_023879404.1	XM_023879404	283	1.89e-144	PREDICTED: Lactuca sativa uncharacterized membrane protein At3g27390-like (LOC111883045), transcript variant X1, mRNA	--	--	--	--	Q8GUM4	398	5.4e-37	Uncharacterized membrane protein At3g27390 OS=Arabidopsis thaliana OX=3702 GN=At3g27390 PE=1 SV=2	PF02751	Transcription initiation factor IIA, gamma subunit	GO:0006367	transcription initiation from RNA polymerase II promoter	--	--	GO:0005672	transcription factor TFIIA complex	--	--
Cluster-29767.107659	1387834117	PWA97336.1	176	1.5e-10	hypothetical protein CTI12_AA028450 [Artemisia annua]	--	--	--	--	--	--	--	--	--	--	--	--	--	--	--	--	--	--	--	--	--	--	--
Cluster-29767.107658	--	--	--	--	--	--	--	--	--	--	--	--	--	--	--	--	--	--	--	--	--	--	--	--	--	--	--	--
Cluster-29767.107657	--	--	--	--	--	--	--	--	--	--	--	--	--	--	--	--	--	--	--	--	--	--	--	--	--	--	--	--
Cluster-29767.107656	--	--	--	--	--	--	--	--	--	--	--	--	--	--	--	--	--	--	--	--	--	--	--	--	--	--	--	--
Cluster-29767.97049	--	--	--	--	--	KP333089.1	KP333089	49	6.79e-15	Chrysanthemum x morifolium microsatellite JH-1253 sequence	--	--	--	--	--	--	--	--	PF05353	Delta Atracotoxin	GO:0006810//GO:0009405	transport//pathogenesis	GO:0019871	sodium channel inhibitor activity	GO:0005576	extracellular region	--	--
Cluster-29767.33608	1570321867	XP_027912923.1	177	2.9e-10	uncharacterized protein LOC114172948 [Vigna unguiculata]	--	--	--	--	--	K15255	PIF1	ATP-dependent DNA helicase PIF1	http://www.genome.jp/dbget-bin/www_bget?ko:K15255	--	--	--	--	PF12297	Ellis van Creveld protein 2 like protein	GO:0007224	smoothened signaling pathway	--	--	--	--	--	--
Cluster-29767.107653	1387805433	PWA71581.1	212	1.8e-14	hypothetical protein CTI12_AA278270 [Artemisia annua]	--	--	--	--	--	--	--	--	--	--	--	--	--	--	--	--	--	--	--	--	--	--	--
Cluster-29767.107652	--	--	--	--	--	--	--	--	--	--	--	--	--	--	--	--	--	--	--	--	--	--	--	--	--	--	--	--
Cluster-29767.107651	--	--	--	--	--	--	--	--	--	--	--	--	--	--	--	--	--	--	--	--	--	--	--	--	--	--	--	--
Cluster-29767.39347	1387835599	PWA98742.1	187	7.4e-12	substrate carrier protein [Artemisia annua]	--	--	--	--	--	--	--	--	--	O04200	140	7.9e-08	Peroxisomal nicotinamide adenine dinucleotide carrier OS=Arabidopsis thaliana OX=3702 GN=PXN PE=1 SV=1	--	--	--	--	--	--	--	--	--	--
Cluster-29767.112844	1387818952	PWA83399.1	281	5.7e-23	F-box associated interaction domain-containing protein [Artemisia annua]	--	--	--	--	--	--	--	--	--	--	--	--	--	--	--	--	--	--	--	--	--	--	--
Cluster-29767.31604	1389781583	XP_024991054.1	1282	2.3e-138	uncharacterized protein LOC112525246 [Cynara cardunculus var. scolymus]	XM_025135286.1	XM_025135286	429	0	PREDICTED: Cynara cardunculus var. scolymus uncharacterized LOC112525246 (LOC112525246), transcript variant X3, mRNA	--	--	--	--	--	--	--	--	--	--	--	--	--	--	--	--	--	--
Cluster-29767.31607	--	--	--	--	--	--	--	--	--	--	--	--	--	--	--	--	--	--	PF07975	TFIIH C1-like domain	GO:0006281	DNA repair	GO:0008270	zinc ion binding	--	--	--	--
Cluster-29767.112847	1387774387	PWA47337.1	222	7.5e-16	hypothetical protein CTI12_AA433760 [Artemisia annua]	--	--	--	--	--	--	--	--	--	--	--	--	--	--	--	--	--	--	--	--	--	--	--
Cluster-29767.31601	--	--	--	--	--	--	--	--	--	--	--	--	--	--	--	--	--	--	--	--	--	--	--	--	--	--	--	--
Cluster-29767.31600	--	--	--	--	--	XM_022115837.1	XM_022115837	47	6.34e-14	PREDICTED: Helianthus annuus serine/threonine-protein kinase Nek6-like (LOC110866678), transcript variant X3, mRNA	--	--	--	--	--	--	--	--	--	--	--	--	--	--	--	--	--	--
Cluster-29767.112842	1387835187	PWA98349.1	1780	4.6e-196	basic helix-loop-helix (bHLH) DNA-binding superfamily protein [Artemisia annua]	XM_022173937.1	XM_022173937	315	1.76e-162	PREDICTED: Helianthus annuus transcription factor bHLH91-like (LOC110930602), transcript variant X2, mRNA	--	--	--	--	Q8GX46	626	1.1e-63	Transcription factor bHLH91 OS=Arabidopsis thaliana OX=3702 GN=BHLH91 PE=2 SV=1	PF00010	Helix-loop-helix DNA-binding domain	--	--	GO:0046983	protein dimerization activity	--	--	--	--
Cluster-19409.0	--	--	--	--	--	--	--	--	--	--	--	--	--	--	--	--	--	--	--	--	--	--	--	--	--	--	--	--
Cluster-29767.26168	1387821313	PWA85514.1	306	9.4e-26	cysteine/Histidine-rich C1 domain family protein [Artemisia annua]	--	--	--	--	--	--	--	--	--	--	--	--	--	PF00130//PF12678	Phorbol esters/diacylglycerol binding domain (C1 domain)//RING-H2 zinc finger domain	GO:0035556	intracellular signal transduction	GO:0008270	zinc ion binding	--	--	--	--
Cluster-29767.112848	1387830982	PWA94391.1	151	1e-07	hypothetical protein CTI12_AA042300 [Artemisia annua]	--	--	--	--	--	--	--	--	--	--	--	--	--	--	--	--	--	--	--	--	--	--	--
Cluster-29767.31608	--	--	--	--	--	JF940498.1	JF940498	59	2.12e-20	Chrysanthemum oreastrum clone a chrysanthemyl diphosphate synthase (CDS) gene, exons 5 through 10 and partial cds &amp;&amp; JF940499.1 Chrysanthemum oreastrum clone b chrysanthemyl diphosphate synthase (CDS) gene, exons 5 through 10 and partial cds &amp;&amp; JF940500.1 Chrysanthemum oreastrum clone c chrysanthemyl diphosphate synthase (CDS) gene, exons 5 through 10 and partial cds &amp;&amp; JF…	--	--	--	--	--	--	--	--	PF02257	RFX DNA-binding domain	GO:0006355	regulation of transcription, DNA-templated	GO:0003677	DNA binding	--	--	--	--
Cluster-29767.26169	1387798106	PWA65425.1	1135	1.3e-121	DC1, C1-like protein [Artemisia annua]	XM_022127218.1	XM_022127218	257	1.35e-130	PREDICTED: Helianthus annuus uncharacterized LOC110878841 (LOC110878841), mRNA	--	--	--	--	--	--	--	--	PF00130	Phorbol esters/diacylglycerol binding domain (C1 domain)	GO:0035556	intracellular signal transduction	--	--	--	--	--	--
Cluster-29767.48780	--	--	--	--	--	XM_023908111.1	XM_023908111	41	8.4e-11	PREDICTED: Lactuca sativa uncharacterized LOC111912375 (LOC111912375), transcript variant X3, mRNA	--	--	--	--	--	--	--	--	--	--	--	--	--	--	--	--	--	--
Cluster-29767.48781	--	--	--	--	--	--	--	--	--	--	--	--	--	--	--	--	--	--	--	--	--	--	--	--	--	--	--	--
Cluster-29767.48782	1387822932	PWA86983.1	2914	0	Leucine-rich repeat-containing protein [Artemisia annua]	XM_022120459.1	XM_022120459	695	0	PREDICTED: Helianthus annuus inactive leucine-rich repeat receptor-like serine/threonine-protein kinase At1g60630 (LOC110871735), transcript variant X1, mRNA	--	--	--	--	Q84MA9	1768	9.6e-196	Inactive leucine-rich repeat receptor-like serine/threonine-protein kinase At1g60630 OS=Arabidopsis thaliana OX=3702 GN=At1g60630 PE=2 SV=1	PF13855//PF13516//PF05083//PF00560//PF00069//PF07714	Leucine rich repeat//Leucine Rich repeat//LST-1 protein//Leucine Rich Repeat//Protein kinase domain//Protein tyrosine and serine/threonine kinase	GO:0006468//GO:0000902//GO:0006955	protein phosphorylation//cell morphogenesis//immune response	GO:0005515//GO:0005524//GO:0004672	protein binding//ATP binding//protein kinase activity	GO:0016020	membrane	--	--
Cluster-29767.48783	1387817947	PWA82504.1	1925	8.2e-213	ATPase, AAA-type, core [Artemisia annua]	XM_025117139.1	XM_025117139	590	0	PREDICTED: Cynara cardunculus var. scolymus CLP protease regulatory subunit CLPX3, mitochondrial-like (LOC112511499), mRNA	K03544	clpX, CLPX	ATP-dependent Clp protease ATP-binding subunit ClpX	http://www.genome.jp/dbget-bin/www_bget?ko:K03544	Q66GN9	1309	8.3e-143	CLP protease regulatory subunit CLPX3, mitochondrial OS=Arabidopsis thaliana OX=3702 GN=CLPX3 PE=2 SV=1	PF00158//PF00493//PF00910//PF02367//PF00004//PF14532//PF07724//PF00270//PF00005//PF07728//PF07726//PF05496//PF01695	Sigma-54 interaction domain//MCM P-loop domain//RNA helicase//Threonylcarbamoyl adenosine biosynthesis protein TsaE//ATPase family associated with various cellular activities (AAA)//Sigma-54 interaction domain//AAA domain (Cdc48 subfamily)//DEAD/DEAH box helicase//ABC transporter//AAA domain (dynein-related subfamily)//ATPase family associated with various cellular activities (AAA)//Holliday junc…	GO:0006281//GO:0006270//GO:0006355//GO:0002949//GO:0006310	DNA repair//DNA replication initiation//regulation of transcription, DNA-templated//tRNA threonylcarbamoyladenosine modification//DNA recombination	GO:0003676//GO:0003723//GO:0005524//GO:0009378//GO:0008134//GO:0016887//GO:0003677//GO:0003724	nucleic acid binding//RNA binding//ATP binding//four-way junction helicase activity//transcription factor binding//ATPase activity//DNA binding//RNA helicase activity	GO:0005657//GO:0005667//GO:0009379	replication fork//transcription regulator complex//Holliday junction helicase complex	KOG0745	Putative ATP-dependent Clp-type protease (AAA+ ATPase superfamily)
Cluster-28301.0	--	--	--	--	--	--	--	--	--	--	--	--	--	--	--	--	--	--	--	--	--	--	--	--	--	--	--	--
Cluster-29767.48785	1387817947	PWA82504.1	168	1.3e-09	ATPase, AAA-type, core [Artemisia annua]	XM_025117139.1	XM_025117139	114	3.12e-51	PREDICTED: Cynara cardunculus var. scolymus CLP protease regulatory subunit CLPX3, mitochondrial-like (LOC112511499), mRNA	K03544	clpX, CLPX	ATP-dependent Clp protease ATP-binding subunit ClpX	http://www.genome.jp/dbget-bin/www_bget?ko:K03544	Q9FK07	150	6.1e-09	CLP protease regulatory subunit CLPX1, mitochondrial OS=Arabidopsis thaliana OX=3702 GN=CLPX1 PE=2 SV=1	--	--	--	--	--	--	--	--	--	--
Cluster-29767.48786	--	--	--	--	--	--	--	--	--	--	--	--	--	--	--	--	--	--	--	--	--	--	--	--	--	--	--	--
Cluster-21028.0	--	--	--	--	--	--	--	--	--	--	--	--	--	--	--	--	--	--	--	--	--	--	--	--	--	--	--	--
Cluster-29767.48788	1387789153	PWA58207.1	850	2.5e-88	spermidine hydroxycinnamoyl transferase [Artemisia annua]	XM_022133481.1	XM_022133481	99	1.61e-42	PREDICTED: Helianthus annuus omega-amidase, chloroplastic (LOC110885772), mRNA	K13065	E2.3.1.133, HCT	shikimate O-hydroxycinnamoyltransferase	http://www.genome.jp/dbget-bin/www_bget?ko:K13065	O64470	449	3e-43	Spermidine hydroxycinnamoyl transferase OS=Arabidopsis thaliana OX=3702 GN=SHT PE=1 SV=1	PF02458	Transferase family	--	--	GO:0016747	transferase activity, transferring acyl groups other than amino-acyl groups	--	--	--	--
Cluster-29767.48789	1387812868	PWA78007.1	1268	9e-137	peptidase S10, serine carboxypeptidase, Alpha/Beta hydrolase fold protein [Artemisia annua]	XM_023897302.1	XM_023897302	399	0	PREDICTED: Lactuca sativa serine carboxypeptidase-like 51 (LOC111901451), transcript variant X1, mRNA	K09646	SCPEP1	serine carboxypeptidase 1	http://www.genome.jp/dbget-bin/www_bget?ko:K09646	Q67Y83	799	8.3e-84	Serine carboxypeptidase-like 51 OS=Arabidopsis thaliana OX=3702 GN=SCPL51 PE=2 SV=2	PF00450	Serine carboxypeptidase	GO:0006508	proteolysis	GO:0004185	serine-type carboxypeptidase activity	--	--	KOG1283	Serine carboxypeptidases
Cluster-29767.84817	1387784866	PWA54890.1	296	1.5e-24	S-crystallin [Artemisia annua]	--	--	--	--	--	K00799	GST, gst	glutathione S-transferase	http://www.genome.jp/dbget-bin/www_bget?ko:K00799	P46417	130	1e-06	Glutathione S-transferase 3 OS=Glycine max OX=3847 GN=GST3 PE=1 SV=1	--	--	--	--	--	--	--	--	--	--
Cluster-29767.25010	543176410	AGV54228.1	669	3.3e-67	polyubiquitin-like protein [Phaseolus vulgaris]	AF221858.1	AF221858	79	2.88e-31	Euphorbia esula polyubiquitin mRNA, partial cds	K08770	UBC	ubiquitin C	http://www.genome.jp/dbget-bin/www_bget?ko:K08770	P0CG63	660	1.4e-67	Polyubiquitin OS=Saccharomyces cerevisiae (strain ATCC 204508 / S288c) OX=559292 GN=UBI4 PE=1 SV=1	PF00789//PF14560//PF00240	UBX domain//Ubiquitin-like domain//Ubiquitin family	--	--	GO:0005515	protein binding	--	--	KOG0001	Ubiquitin and ubiquitin-like proteins
Cluster-17480.0	--	--	--	--	--	--	--	--	--	--	--	--	--	--	--	--	--	--	--	--	--	--	--	--	--	--	--	--
Cluster-18132.0	--	--	--	--	--	--	--	--	--	--	--	--	--	--	--	--	--	--	--	--	--	--	--	--	--	--	--	--
Cluster-27405.0	--	--	--	--	--	--	--	--	--	--	--	--	--	--	--	--	--	--	--	--	--	--	--	--	--	--	--	--
Cluster-29767.106291	1387781685	PWA52534.1	368	6.7e-33	lysM domain-containing protein [Artemisia annua]	--	--	--	--	--	--	--	--	--	--	--	--	--	PF03059	Nicotianamine synthase protein	GO:0030418	nicotianamine biosynthetic process	GO:0030410	nicotianamine synthase activity	--	--	--	--
Cluster-29767.63868	1387819405	PWA83799.1	871	1.1e-90	zinc finger, RING/FYVE/PHD-type, Zinc finger, RING-H2-type [Artemisia annua]	XM_022113601.1	XM_022113601	234	1.83e-117	PREDICTED: Helianthus annuus probable E3 ubiquitin-protein ligase RHB1A (LOC110864517), transcript variant X1, mRNA	--	--	--	--	Q2HIJ8	443	1.8e-42	Probable E3 ubiquitin-protein ligase RHB1A OS=Arabidopsis thaliana OX=3702 GN=RHB1A PE=2 SV=1	PF00097//PF12861//PF12906//PF11789//PF12678	Zinc finger, C3HC4 type (RING finger)//Anaphase-promoting complex subunit 11 RING-H2 finger//RING-variant domain//Zinc-finger of the MIZ type in Nse subunit//RING-H2 zinc finger domain	GO:0016567	protein ubiquitination	GO:0008270//GO:0004842//GO:0046872	zinc ion binding//ubiquitin-protein transferase activity//metal ion binding	GO:0005680	anaphase-promoting complex	--	--
Cluster-29767.59451	1552144451	RVW15011.1	411	1.5e-37	60S ribosomal protein L37a-2 [Vitis vinifera]	XM_025138794.1	XM_025138794	186	5.23e-91	PREDICTED: Cynara cardunculus var. scolymus 60S ribosomal protein L37a (LOC112527932), mRNA	K02921	RP-L37Ae, RPL37A	large subunit ribosomal protein L37Ae	http://www.genome.jp/dbget-bin/www_bget?ko:K02921	Q9XHE4	402	6.3e-38	60S ribosomal protein L37a OS=Gossypium hirsutum OX=3635 GN=RPL37A PE=3 SV=1	PF06220//PF01780	U1 zinc finger//Ribosomal L37ae protein family	GO:0006412//GO:0042254	translation//ribosome biogenesis	GO:0003735//GO:0008270	structural constituent of ribosome//zinc ion binding	GO:0005840	ribosome	KOG0402	60S ribosomal protein L37
Cluster-5247.0	--	--	--	--	--	--	--	--	--	--	--	--	--	--	--	--	--	--	--	--	--	--	--	--	--	--	--	--
Cluster-94.0	1344016624	XP_023891051.1	249	3.1e-19	inositol-3-phosphate synthase 1-like [Quercus suber]	XM_018383791.1	XM_018383791	320	5.37e-166	Fusarium oxysporum f. sp. lycopersici 4287 myo-inositol-1-phosphate synthase mRNA	K01858	INO1, ISYNA1	myo-inositol-1-phosphate synthase	http://www.genome.jp/dbget-bin/www_bget?ko:K01858	Q54N49	180	1.2e-12	Inositol-3-phosphate synthase OS=Dictyostelium discoideum OX=44689 GN=ino1 PE=3 SV=1	PF07994	Myo-inositol-1-phosphate synthase	GO:0006021//GO:0019872//GO:0008654	inositol biosynthetic process//streptomycin biosynthetic process//phospholipid biosynthetic process	GO:0004512	inositol-3-phosphate synthase activity	--	--	--	--
Cluster-29767.29568	1387794961	PWA62828.1	245	9.3e-19	ethylene induced calmodulin binding protein [Artemisia annua]	--	--	--	--	--	K21596	-	-	http://www.genome.jp/dbget-bin/www_bget?ko:K21596	Q6NPP4	135	2e-07	Calmodulin-binding transcription activator 2 OS=Arabidopsis thaliana OX=3702 GN=CAMTA2 PE=1 SV=1	PF03859	CG-1 domain	--	--	GO:0003677	DNA binding	--	--	--	--
Cluster-21602.1	1387773139	PWA46491.1	885	1.5e-92	nucleic acid-binding, OB-fold protein [Artemisia annua]	--	--	--	--	--	K07466	RFA1, RPA1, rpa	replication factor A1	http://www.genome.jp/dbget-bin/www_bget?ko:K07466	Q9FME0	172	2.6e-11	Replication protein A 70 kDa DNA-binding subunit D OS=Arabidopsis thaliana OX=3702 GN=RPA1D PE=2 SV=1	--	--	--	--	--	--	--	--	--	--
Cluster-17876.0	--	--	--	--	--	--	--	--	--	--	--	--	--	--	--	--	--	--	--	--	--	--	--	--	--	--	--	--
Cluster-28973.0	--	--	--	--	--	--	--	--	--	--	--	--	--	--	--	--	--	--	--	--	--	--	--	--	--	--	--	--
Cluster-14915.0	--	--	--	--	--	--	--	--	--	--	--	--	--	--	--	--	--	--	--	--	--	--	--	--	--	--	--	--
Cluster-7323.0	1387819064	PWA83498.1	404	3.5e-37	hypothetical protein CTI12_AA168350 [Artemisia annua]	--	--	--	--	--	--	--	--	--	--	--	--	--	--	--	--	--	--	--	--	--	--	--
Cluster-18352.0	--	--	--	--	--	--	--	--	--	--	--	--	--	--	--	--	--	--	--	--	--	--	--	--	--	--	--	--
Cluster-23381.0	--	--	--	--	--	--	--	--	--	--	--	--	--	--	--	--	--	--	--	--	--	--	--	--	--	--	--	--
Cluster-29767.63869	1387794554	PWA62500.1	823	5.9e-85	hypothetical protein CTI12_AA363500 [Artemisia annua]	XM_022167601.1	XM_022167601	189	2.7e-92	PREDICTED: Helianthus annuus putative protein TPRXL (LOC110923472), transcript variant X8, mRNA	--	--	--	--	--	--	--	--	--	--	--	--	--	--	--	--	--	--
Cluster-7945.0	--	--	--	--	--	--	--	--	--	--	--	--	--	--	--	--	--	--	--	--	--	--	--	--	--	--	--	--
Cluster-29767.93651	--	--	--	--	--	--	--	--	--	--	--	--	--	--	--	--	--	--	--	--	--	--	--	--	--	--	--	--
Cluster-26067.0	1387832504	PWA95812.1	1236	3e-133	ovate family protein 7 [Artemisia annua]	XM_025125608.1	XM_025125608	141	5.04e-66	PREDICTED: Cynara cardunculus var. scolymus transcription repressor OFP7-like (LOC112518040), mRNA	--	--	--	--	Q9ZU65	260	1.7e-21	Transcription repressor OFP7 OS=Arabidopsis thaliana OX=3702 GN=OFP7 PE=2 SV=1	--	--	--	--	--	--	--	--	--	--
Cluster-29767.6008	1387834249	PWA97461.1	537	5.3e-52	BRCT domain-containing DNA repair protein [Artemisia annua]	XM_025115015.1	XM_025115015	124	2.22e-56	PREDICTED: Cynara cardunculus var. scolymus DNA-repair protein XRCC1 (LOC112509836), mRNA	K10803	XRCC1	DNA-repair protein XRCC1	http://www.genome.jp/dbget-bin/www_bget?ko:K10803	Q24JK4	243	2.5e-19	DNA-repair protein XRCC1 OS=Arabidopsis thaliana OX=3702 GN=XRCC1 PE=1 SV=1	PF05453//PF13922//PF02188//PF15761	BmTXKS1/BmP02 toxin family//PHD domain of transcriptional enhancer, Asx//GoLoco motif//Immortalisation up-regulated protein	GO:0009405//GO:0006810	pathogenesis//transport	GO:0003677//GO:0008200//GO:0030695	DNA binding//ion channel inhibitor activity//GTPase regulator activity	GO:0005634//GO:0005576	nucleus//extracellular region	--	--
Cluster-29767.6009	1387834249	PWA97461.1	529	1.4e-51	BRCT domain-containing DNA repair protein [Artemisia annua]	XM_022160653.1	XM_022160653	158	8.07e-76	PREDICTED: Helianthus annuus DNA-repair protein XRCC1 (LOC110915903), transcript variant X1, mRNA	K10803	XRCC1	DNA-repair protein XRCC1	http://www.genome.jp/dbget-bin/www_bget?ko:K10803	Q24JK4	321	6.8e-29	DNA-repair protein XRCC1 OS=Arabidopsis thaliana OX=3702 GN=XRCC1 PE=1 SV=1	--	--	--	--	--	--	--	--	KOG3226	DNA repair protein
Cluster-30053.0	--	--	--	--	--	--	--	--	--	--	--	--	--	--	--	--	--	--	--	--	--	--	--	--	--	--	--	--
Cluster-29767.6000	1387790620	PWA59356.1	1714	2.5e-188	topoisomerase 3alpha [Artemisia annua]	XM_025128219.1	XM_025128219	534	0	PREDICTED: Cynara cardunculus var. scolymus DNA topoisomerase 3-alpha (LOC112519904), mRNA	K03165	TOP3	DNA topoisomerase III	http://www.genome.jp/dbget-bin/www_bget?ko:K03165	C7J0A2	1343	1e-146	DNA topoisomerase 3-alpha OS=Oryza sativa subsp. japonica OX=39947 GN=TOP3A PE=3 SV=1	PF01131//PF02837	DNA topoisomerase//Glycosyl hydrolases family 2, sugar binding domain	GO:0006265//GO:0005975	DNA topological change//carbohydrate metabolic process	GO:0004553//GO:0003677//GO:0003916	hydrolase activity, hydrolyzing O-glycosyl compounds//DNA binding//DNA topoisomerase activity	--	--	KOG1956	DNA topoisomerase III alpha
Cluster-29767.6001	--	--	--	--	--	--	--	--	--	--	--	--	--	--	--	--	--	--	--	--	--	--	--	--	--	--	--	--
Cluster-11112.0	--	--	--	--	--	--	--	--	--	--	--	--	--	--	--	--	--	--	--	--	--	--	--	--	--	--	--	--
Cluster-19452.0	1387782907	PWA53421.1	448	4e-42	hypothetical protein CTI12_AA444590 [Artemisia annua]	--	--	--	--	--	--	--	--	--	--	--	--	--	--	--	--	--	--	--	--	--	--	--
Cluster-29767.6004	--	--	--	--	--	--	--	--	--	--	--	--	--	--	--	--	--	--	--	--	--	--	--	--	--	--	--	--
Cluster-29767.6005	--	--	--	--	--	--	--	--	--	--	--	--	--	--	--	--	--	--	--	--	--	--	--	--	--	--	--	--
Cluster-20035.0	--	--	--	--	--	--	--	--	--	--	--	--	--	--	--	--	--	--	--	--	--	--	--	--	--	--	--	--
Cluster-29767.6007	--	--	--	--	--	--	--	--	--	--	--	--	--	--	--	--	--	--	--	--	--	--	--	--	--	--	--	--
Cluster-15178.0	--	--	--	--	--	XM_025111332.1	XM_025111332	59	1.07e-20	PREDICTED: Cynara cardunculus var. scolymus E3 ubiquitin-protein ligase XBAT32 (LOC112506973), transcript variant X2, mRNA	--	--	--	--	--	--	--	--	--	--	--	--	--	--	--	--	--	--
Cluster-12843.0	--	--	--	--	--	--	--	--	--	--	--	--	--	--	--	--	--	--	--	--	--	--	--	--	--	--	--	--
Cluster-20196.0	--	--	--	--	--	--	--	--	--	--	--	--	--	--	--	--	--	--	--	--	--	--	--	--	--	--	--	--
Cluster-15881.0	--	--	--	--	--	--	--	--	--	--	--	--	--	--	--	--	--	--	PF00802	Pneumovirus attachment glycoprotein G	--	--	--	--	GO:0055036	virion membrane	--	--
Cluster-29767.34387	1387794449	PWA62414.1	287	2e-23	glucose/ribitol dehydrogenase [Artemisia annua]	--	--	--	--	--	K15095	E1.1.1.208	(+)-neomenthol dehydrogenase	http://www.genome.jp/dbget-bin/www_bget?ko:K15095	--	--	--	--	--	--	--	--	--	--	--	--	--	--
Cluster-29767.34386	1389803993	XP_024966377.1	3357	0	cyclic nucleotide-gated ion channel 17-like isoform X3 [Cynara cardunculus var. scolymus]	XM_025110609.1	XM_025110609	1257	0	PREDICTED: Cynara cardunculus var. scolymus cyclic nucleotide-gated ion channel 17-like (LOC112506503), transcript variant X3, mRNA	K05391	CNGF	cyclic nucleotide gated channel, other eukaryote	http://www.genome.jp/dbget-bin/www_bget?ko:K05391	Q8L7Z0	2517	1.2e-282	Cyclic nucleotide-gated ion channel 17 OS=Arabidopsis thaliana OX=3702 GN=CNGC17 PE=1 SV=1	PF00520//PF00612	Ion transport protein//IQ calmodulin-binding motif	GO:0055085//GO:0006811	transmembrane transport//ion transport	GO:0005515//GO:0005216	protein binding//ion channel activity	GO:0016020	membrane	--	--
Cluster-29767.34385	--	--	--	--	--	--	--	--	--	--	--	--	--	--	--	--	--	--	--	--	--	--	--	--	--	--	--	--
Cluster-29767.34384	1387814728	PWA79646.1	200	5.2e-13	formyltetrahydrofolate deformylase [Artemisia annua]	XM_025131286.1	XM_025131286	89	5.23e-37	PREDICTED: Cynara cardunculus var. scolymus formyltetrahydrofolate deformylase 1, mitochondrial (LOC112522192), transcript variant X2, mRNA	K01433	purU	formyltetrahydrofolate deformylase	http://www.genome.jp/dbget-bin/www_bget?ko:K01433	F4JP46	151	9.6e-09	Formyltetrahydrofolate deformylase 2, mitochondrial OS=Arabidopsis thaliana OX=3702 GN=PURU2 PE=1 SV=1	--	--	--	--	--	--	--	--	--	--
Cluster-29767.34383	1387819956	PWA84291.1	1167	4.7e-125	Late embryogenesis abundant protein, LEA-14 [Artemisia annua]	--	--	--	--	--	--	--	--	--	--	--	--	--	--	--	--	--	--	--	--	--	--	--
Cluster-29767.34382	--	--	--	--	--	--	--	--	--	--	--	--	--	--	--	--	--	--	--	--	--	--	--	--	--	--	--	--
Cluster-29767.34381	--	--	--	--	--	KU744606.1	KU744606	126	3.55e-58	Artemisia annua homeobox protein 1 (HD1) gene, promoter region	--	--	--	--	--	--	--	--	--	--	--	--	--	--	--	--	--	--
Cluster-29767.34380	--	--	--	--	--	KU744606.1	KU744606	131	9.8e-61	Artemisia annua homeobox protein 1 (HD1) gene, promoter region	--	--	--	--	--	--	--	--	--	--	--	--	--	--	--	--	--	--
Cluster-1699.0	--	--	--	--	--	--	--	--	--	--	--	--	--	--	--	--	--	--	--	--	--	--	--	--	--	--	--	--
Cluster-9711.0	--	--	--	--	--	--	--	--	--	--	K07375	TUBB	tubulin beta	http://www.genome.jp/dbget-bin/www_bget?ko:K07375	--	--	--	--	PF05971	RNA methyltransferase	--	--	GO:0008168	methyltransferase activity	--	--	--	--
Cluster-29767.24753	--	--	--	--	--	--	--	--	--	--	--	--	--	--	--	--	--	--	--	--	--	--	--	--	--	--	--	--
Cluster-29767.34389	1387824742	PWA88627.1	180	2.6e-10	Nucleic acid-binding, OB-fold [Artemisia annua]	MH704580.1	MH704580	46	1.01e-12	Helianthus annuus cultivar HA89(MAX1) CMS mitochondrion, complete genome	--	--	--	--	--	--	--	--	PF05745	Chlamydia 15 kDa cysteine-rich outer membrane protein (CRPA)	--	--	--	--	GO:0019867	outer membrane	--	--
Cluster-29767.34388	--	--	--	--	--	--	--	--	--	--	--	--	--	--	--	--	--	--	--	--	--	--	--	--	--	--	--	--
Cluster-811.0	--	--	--	--	--	--	--	--	--	--	--	--	--	--	--	--	--	--	--	--	--	--	--	--	--	--	--	--
Cluster-29767.70353	--	--	--	--	--	--	--	--	--	--	--	--	--	--	--	--	--	--	PF00751//PF01708	DM DNA binding domain//Geminivirus putative movement protein	GO:0046740//GO:0006355	transport of virus in host, cell to cell//regulation of transcription, DNA-templated	GO:0043565	sequence-specific DNA binding	GO:0016021	integral component of membrane	--	--
Cluster-29767.88281	1387811534	PWA76840.1	2392	1.2e-266	hypothetical protein CTI12_AA228040 [Artemisia annua]	XM_023898408.1	XM_023898408	700	0	PREDICTED: Lactuca sativa nitrate regulatory gene2 protein-like (LOC111902580), mRNA	--	--	--	--	A0A178VBJ0	1372	8.5e-150	Protein ALTERED PHOSPHATE STARVATION RESPONSE 1 OS=Arabidopsis thaliana OX=3702 GN=APSR1 PE=2 SV=1	PF00432	Prenyltransferase and squalene oxidase repeat	--	--	GO:0003824	catalytic activity	--	--	--	--
Cluster-12824.0	1387788686	PWA57830.1	297	9.1e-25	hypothetical protein CTI12_AA275630 [Artemisia annua]	--	--	--	--	--	--	--	--	--	--	--	--	--	PF02600	Disulfide bond formation protein DsbB	GO:0006457//GO:0006118	protein folding//obsolete electron transport	GO:0015035	protein disulfide oxidoreductase activity	GO:0016021	integral component of membrane	--	--
Cluster-29767.36381	--	--	--	--	--	--	--	--	--	--	--	--	--	--	--	--	--	--	--	--	--	--	--	--	--	--	--	--
Cluster-29767.23608	--	--	--	--	--	--	--	--	--	--	--	--	--	--	--	--	--	--	--	--	--	--	--	--	--	--	--	--
Cluster-29767.20075	1387801083	PWA67913.1	148	4.2e-07	26S proteasome non-ATPase regulatory subunit 14 [Artemisia annua]	--	--	--	--	--	--	--	--	--	--	--	--	--	--	--	--	--	--	--	--	--	--	--
Cluster-29767.68885	--	--	--	--	--	--	--	--	--	--	--	--	--	--	--	--	--	--	--	--	--	--	--	--	--	--	--	--
Cluster-29767.68884	1387770544	PWA44747.1	1530	5.5e-167	molybdate-anion transporter, Major facilitator superfamily domain protein [Artemisia annua]	XM_022117154.1	XM_022117154	665	0	PREDICTED: Helianthus annuus molybdate-anion transporter-like (LOC110868068), mRNA	--	--	--	--	Q6N075	529	2.5e-52	Molybdate-anion transporter OS=Homo sapiens OX=9606 GN=MFSD5 PE=1 SV=2	PF07690//PF00083//PF05631	Major Facilitator Superfamily//Sugar (and other) transporter//Sugar-tranasporters, 12 TM	GO:0055085//GO:0015689	transmembrane transport//molybdate ion transport	GO:0015098//GO:0022857	molybdate ion transmembrane transporter activity//transmembrane transporter activity	GO:0016021	integral component of membrane	KOG4332	Predicted sugar transporter
Cluster-26164.0	--	--	--	--	--	--	--	--	--	--	--	--	--	--	--	--	--	--	--	--	--	--	--	--	--	--	--	--
Cluster-29767.38414	1387831108	PWA94508.1	919	1.6e-96	branched-chain alpha-keto acid decarboxylase E1 beta subunit [Artemisia annua]	XM_022153614.1	XM_022153614	366	0	PREDICTED: Helianthus annuus 2-oxoisovalerate dehydrogenase subunit beta 1, mitochondrial-like (LOC110908658), mRNA	K00167	BCKDHB, bkdA2	2-oxoisovalerate dehydrogenase E1 component beta subunit	http://www.genome.jp/dbget-bin/www_bget?ko:K00167	Q9LDY2	788	9.2e-83	2-oxoisovalerate dehydrogenase subunit beta 2, mitochondrial OS=Arabidopsis thaliana OX=3702 GN=DIN4 PE=1 SV=1	--	--	--	--	--	--	--	--	KOG0525	Branched chain alpha-keto acid dehydrogenase E1, beta subunit
Cluster-29767.68881	--	--	--	--	--	--	--	--	--	--	--	--	--	--	--	--	--	--	--	--	--	--	--	--	--	--	--	--
Cluster-29767.70356	--	--	--	--	--	--	--	--	--	--	--	--	--	--	--	--	--	--	--	--	--	--	--	--	--	--	--	--
Cluster-29767.68883	--	--	--	--	--	XM_022179354.1	XM_022179354	69	3e-26	PREDICTED: Helianthus annuus molybdate-anion transporter-like (LOC110936947), mRNA	--	--	--	--	--	--	--	--	--	--	--	--	--	--	--	--	--	--
Cluster-29767.68882	--	--	--	--	--	--	--	--	--	--	--	--	--	--	--	--	--	--	--	--	--	--	--	--	--	--	--	--
Cluster-29767.36382	--	--	--	--	--	--	--	--	--	--	--	--	--	--	--	--	--	--	--	--	--	--	--	--	--	--	--	--
Cluster-29767.68889	1387822874	PWA86930.1	633	4.4e-63	phospholipase D P1 [Artemisia annua]	XM_025140584.1	XM_025140584	223	2.31e-111	PREDICTED: Cynara cardunculus var. scolymus phospholipase D zeta 1-like (LOC112529346), transcript variant X2, mRNA	K01115	PLD1_2	phospholipase D1/2	http://www.genome.jp/dbget-bin/www_bget?ko:K01115	Q9LRZ5	426	1.7e-40	Phospholipase D zeta 1 OS=Arabidopsis thaliana OX=3702 GN=PLDZETA1 PE=1 SV=1	--	--	--	--	--	--	--	--	--	--
Cluster-29767.35412	1387820732	PWA84993.1	481	3.2e-45	phosphoglycerate/bisphosphoglycerate mutase family protein [Artemisia annua]	XM_024163491.1	XM_024163491	80	1.26e-31	PREDICTED: Morus notabilis probable 2-carboxy-D-arabinitol-1-phosphatase (LOC21392329), mRNA	K15634	gpmB	probable phosphoglycerate mutase	http://www.genome.jp/dbget-bin/www_bget?ko:K15634	W5EP13	244	3.7e-19	2-carboxy-D-arabinitol-1-phosphatase OS=Triticum aestivum OX=4565 PE=1 SV=1	PF06072	Alphaherpesvirus tegument protein US9	GO:0075733	intracellular transport of virus	--	--	--	--	--	--
Cluster-29767.109493	--	--	--	--	--	--	--	--	--	--	--	--	--	--	--	--	--	--	--	--	--	--	--	--	--	--	--	--
Cluster-29767.109492	--	--	--	--	--	--	--	--	--	--	--	--	--	--	--	--	--	--	--	--	--	--	--	--	--	--	--	--
Cluster-29767.109491	1387810872	PWA76254.1	160	5.9e-08	DNA polymerase epsilon catalytic subunit [Artemisia annua]	--	--	--	--	--	--	--	--	--	--	--	--	--	--	--	--	--	--	--	--	--	--	--
Cluster-29767.109490	--	--	--	--	--	--	--	--	--	--	--	--	--	--	--	--	--	--	--	--	--	--	--	--	--	--	--	--
Cluster-29767.109497	1387825049	PWA88908.1	235	2.8e-17	galactose oxidase/kelch, beta-propeller [Artemisia annua]	XM_023876594.1	XM_023876594	81	8.96e-33	PREDICTED: Lactuca sativa rab9 effector protein with kelch motifs-like (LOC111880188), mRNA	K20285	RABEPK	Rab9 effector protein with kelch motifs	http://www.genome.jp/dbget-bin/www_bget?ko:K20285	--	--	--	--	PF10550//PF08714	Conantokin toxin//Formaldehyde-activating enzyme (Fae)	GO:0016051//GO:0009405	carbohydrate biosynthetic process//pathogenesis	GO:0016840	carbon-nitrogen lyase activity	GO:0035792	host cell postsynaptic membrane	--	--
Cluster-29767.109496	--	--	--	--	--	--	--	--	--	--	--	--	--	--	--	--	--	--	--	--	--	--	--	--	--	--	--	--
Cluster-29767.109495	1387795813	PWA63526.1	1007	1.2e-106	leucine-rich repeat transmembrane protein kinase protein [Artemisia annua]	--	--	--	--	--	--	--	--	--	O65924	591	7.6e-60	Putative leucine-rich repeat receptor-like protein kinase At2g19210 OS=Arabidopsis thaliana OX=3702 GN=At2g19210 PE=1 SV=1	--	--	--	--	--	--	--	--	--	--
Cluster-29767.109494	--	--	--	--	--	--	--	--	--	--	--	--	--	--	--	--	--	--	--	--	--	--	--	--	--	--	--	--
Cluster-29767.109499	1387828717	PWA92284.1	154	1.4e-07	hypothetical protein CTI12_AA082000 [Artemisia annua]	--	--	--	--	--	--	--	--	--	--	--	--	--	PF07647	SAM domain (Sterile alpha motif)	--	--	GO:0005515	protein binding	--	--	--	--
Cluster-29767.109498	--	--	--	--	--	--	--	--	--	--	--	--	--	--	--	--	--	--	--	--	--	--	--	--	--	--	--	--
Cluster-4403.0	1377601076	GBG31529.1	267	2.5e-21	D-2-hydroxyglutarate dehydrogenase, mitochondrial [Hondaea fermentalgiana]	XM_001701259.1	XM_001701259	47	3.02e-14	Chlamydomonas reinhardtii predicted protein (CHLREDRAFT_122423), partial mRNA	K18204	AtD-2HGDH	D-2-hydroxyglutarate dehydrogenase	http://www.genome.jp/dbget-bin/www_bget?ko:K18204	Q1JPD3	246	2.6e-20	D-2-hydroxyglutarate dehydrogenase, mitochondrial OS=Bos taurus OX=9913 GN=D2HGDH PE=2 SV=2	PF01565	FAD binding domain	GO:0055114	oxidation-reduction process	GO:0050660//GO:0016491	flavin adenine dinucleotide binding//oxidoreductase activity	--	--	KOG1232	Proteins containing the FAD binding domain
Cluster-29343.0	--	--	--	--	--	--	--	--	--	--	--	--	--	--	--	--	--	--	--	--	--	--	--	--	--	--	--	--
Cluster-29767.77759	--	--	--	--	--	--	--	--	--	--	--	--	--	--	--	--	--	--	--	--	--	--	--	--	--	--	--	--
Cluster-29767.77758	1387830842	PWA94258.1	1573	7.1e-172	DNA-binding protein [Artemisia annua]	XM_025131825.1	XM_025131825	729	0	PREDICTED: Cynara cardunculus var. scolymus DNA-binding protein SMUBP-2 (LOC112522591), mRNA	--	--	--	--	Q60560	706	9.3e-73	DNA-binding protein SMUBP-2 OS=Mesocricetus auratus OX=10036 GN=IGHMBP2 PE=1 SV=1	PF05970//PF04851//PF00176//PF03796//PF07728//PF05496//PF01443//PF02367//PF03266//PF00004//PF00580//PF02562//PF00005//PF00270//PF04263	PIF1-like helicase//Type III restriction enzyme, res subunit//SNF2 family N-terminal domain//DnaB-like helicase C terminal domain//AAA domain (dynein-related subfamily)//Holliday junction DNA helicase RuvB P-loop domain//Viral (Superfamily 1) RNA helicase//Threonylcarbamoyl adenosine biosynthesis protein TsaE//NTPase//ATPase family associated with various cellular activities (AAA)//UvrD/REP helic…	GO:0002949//GO:0009229//GO:0006310//GO:0000723//GO:0006281//GO:0006260//GO:0006772	tRNA threonylcarbamoyladenosine modification//thiamine diphosphate biosynthetic process//DNA recombination//telomere maintenance//DNA repair//DNA replication//thiamine metabolic process	GO:0004788//GO:0098519//GO:0016787//GO:0003676//GO:0005524//GO:0016887//GO:0009378//GO:0003678//GO:0003677	thiamine diphosphokinase activity//nucleotide phosphatase activity, acting on free nucleotides//hydrolase activity//nucleic acid binding//ATP binding//ATPase activity//four-way junction helicase activity//DNA helicase activity//DNA binding	GO:0009379//GO:0005657	Holliday junction helicase complex//replication fork	KOG1803	DNA helicase
Cluster-29767.68709	--	--	--	--	--	--	--	--	--	--	--	--	--	--	--	--	--	--	--	--	--	--	--	--	--	--	--	--
Cluster-26342.0	976901526	KVH89565.1	142	1.9e-06	hypothetical protein Ccrd_008447 [Cynara cardunculus var. scolymus]	XM_008806451.1	XM_008806451	35	3.64e-07	PREDICTED: Phoenix dactylifera protein MOR1-like (LOC103717893), mRNA	K16803	CKAP5, XMAP215	cytoskeleton-associated protein 5	http://www.genome.jp/dbget-bin/www_bget?ko:K16803	--	--	--	--	--	--	--	--	--	--	--	--	--	--
Cluster-6746.0	--	--	--	--	--	--	--	--	--	--	--	--	--	--	--	--	--	--	--	--	--	--	--	--	--	--	--	--
Cluster-29767.77750	--	--	--	--	--	--	--	--	--	--	--	--	--	--	--	--	--	--	--	--	--	--	--	--	--	--	--	--
Cluster-29767.77753	1387792512	PWA60846.1	1010	1.3e-106	protein WRKY1 [Artemisia annua]	KC615360.1	KC615360	510	0	Chrysanthemum x morifolium WRKY6 mRNA, complete cds	--	--	--	--	Q9SR07	306	2.2e-26	Probable WRKY transcription factor 39 OS=Arabidopsis thaliana OX=3702 GN=WRKY39 PE=2 SV=1	PF03106	WRKY DNA -binding domain	GO:0006355	regulation of transcription, DNA-templated	GO:0003700//GO:0043565	DNA-binding transcription factor activity//sequence-specific DNA binding	GO:0005667	transcription regulator complex	--	--
Cluster-29767.77752	1340518479	XP_023739811.1	655	1.5e-65	VAMP-like protein YKT61 [Lactuca sativa]	XM_025106088.1	XM_025106088	278	7.35e-142	PREDICTED: Cynara cardunculus var. scolymus VAMP-like protein YKT61 (LOC112502232), mRNA	K08516	YKT6	synaptobrevin homolog YKT6	http://www.genome.jp/dbget-bin/www_bget?ko:K08516	Q9ZRD6	596	3.9e-60	VAMP-like protein YKT61 OS=Arabidopsis thaliana OX=3702 GN=YKT61 PE=2 SV=1	PF00957	Synaptobrevin	GO:0016192	vesicle-mediated transport	--	--	GO:0016021	integral component of membrane	KOG0861	SNARE protein YKT6, synaptobrevin/VAMP syperfamily
Cluster-29767.77755	1387808073	PWA73831.1	399	1.3e-36	hypothetical protein CTI12_AA257810 [Artemisia annua]	XM_022116646.1	XM_022116646	150	1.77e-71	PREDICTED: Helianthus annuus CDK5RAP3-like protein (LOC110867639), mRNA	--	--	--	--	Q9FG23	305	3.9e-27	CDK5RAP3-like protein OS=Arabidopsis thaliana OX=3702 GN=At5g06830 PE=2 SV=2	--	--	--	--	--	--	--	--	--	--
Cluster-29767.77754	1387747186	PWA34102.1	1667	6.5e-183	cytochrome P450 93A3 [Artemisia annua]	XM_025125130.1	XM_025125130	309	4.25e-159	PREDICTED: Cynara cardunculus var. scolymus cytochrome P450 93A3-like (LOC112517753), mRNA	--	--	--	--	O81973	1244	2.8e-135	Cytochrome P450 93A3 OS=Glycine max OX=3847 GN=CYP93A3 PE=2 SV=1	PF00067	Cytochrome P450	GO:0055114	oxidation-reduction process	GO:0020037//GO:0016705//GO:0005506	heme binding//oxidoreductase activity, acting on paired donors, with incorporation or reduction of molecular oxygen//iron ion binding	--	--	--	--
Cluster-29767.77757	1387829163	PWA92696.1	176	1.4e-10	hypothetical protein CTI12_AA075180 [Artemisia annua]	--	--	--	--	--	--	--	--	--	--	--	--	--	--	--	--	--	--	--	--	--	--	--
Cluster-29767.77756	1585773504	XP_028081492.1	1050	1.7e-111	histidine--tRNA ligase, chloroplastic/mitochondrial isoform X1 [Camellia sinensis]	XM_025132662.1	XM_025132662	436	0	PREDICTED: Cynara cardunculus var. scolymus histidine--tRNA ligase, chloroplastic/mitochondrial (LOC112523171), mRNA	K01892	HARS, hisS	histidyl-tRNA synthetase	http://www.genome.jp/dbget-bin/www_bget?ko:K01892	O82413	875	1.2e-92	Histidine--tRNA ligase, chloroplastic/mitochondrial OS=Arabidopsis thaliana OX=3702 GN=At3g46100 PE=2 SV=1	PF00587//PF13181//PF01409//PF03979//PF05697	tRNA synthetase class II core domain (G, H, P, S and T)//Tetratricopeptide repeat//tRNA synthetases class II core domain (F)//Sigma-70 factor, region 1.1//Bacterial trigger factor protein (TF)	GO:0043039//GO:0006457//GO:0006418//GO:0015031//GO:0006355	tRNA aminoacylation//protein folding//tRNA aminoacylation for protein translation//protein transport//regulation of transcription, DNA-templated	GO:0005524//GO:0000049//GO:0005515//GO:0000166//GO:0004812//GO:0003677	ATP binding//tRNA binding//protein binding//nucleotide binding//aminoacyl-tRNA ligase activity//DNA binding	--	--	KOG1936	Histidyl-tRNA synthetase
Cluster-29767.34923	1387829405	PWA92921.1	1372	9.4e-149	Glutaredoxin [Artemisia annua]	XM_022146333.1	XM_022146333	213	8.79e-106	PREDICTED: Helianthus annuus uncharacterized protein At3g28850-like (LOC110899442), mRNA	--	--	--	--	Q9FLE8	324	1.2e-28	Uncharacterized protein At5g39865 OS=Arabidopsis thaliana OX=3702 GN=At5g39865 PE=2 SV=1	PF00462	Glutaredoxin	GO:0045454//GO:0006118	cell redox homeostasis//obsolete electron transport	GO:0015035//GO:0009055	protein disulfide oxidoreductase activity//electron transfer activity	--	--	--	--
Cluster-29767.34922	--	--	--	--	--	--	--	--	--	--	--	--	--	--	--	--	--	--	PF02854	MIF4G domain	--	--	GO:0005515//GO:0003723	protein binding//RNA binding	--	--	--	--
Cluster-29767.34921	--	--	--	--	--	--	--	--	--	--	--	--	--	--	--	--	--	--	--	--	--	--	--	--	--	--	--	--
Cluster-29767.34920	1387826039	PWA89813.1	486	2e-46	protein kinase-like domain, Concanavalin A-like lectin/glucanase domain protein [Artemisia annua]	--	--	--	--	--	--	--	--	--	Q3E8W4	145	2.7e-08	Receptor-like protein kinase ANXUR2 OS=Arabidopsis thaliana OX=3702 GN=ANX2 PE=1 SV=1	PF00069//PF07714	Protein kinase domain//Protein tyrosine and serine/threonine kinase	GO:0006468	protein phosphorylation	GO:0005524//GO:0004672	ATP binding//protein kinase activity	--	--	--	--
Cluster-29767.34927	1226815238	XP_021856850.1	136	4.2e-06	heat shock cognate 70 kDa protein 1-like [Spinacia oleracea]	XM_025137838.1	XM_025137838	66	9.08e-25	PREDICTED: Cynara cardunculus var. scolymus luminal-binding protein (LOC112527294), mRNA	K03283	HSPA1_8	heat shock 70kDa protein 1/8	http://www.genome.jp/dbget-bin/www_bget?ko:K03283	Q42434	134	2.7e-07	Luminal-binding protein OS=Spinacia oleracea OX=3562 GN=HSC70 PE=2 SV=1	PF08022	FAD-binding domain	GO:0055114	oxidation-reduction process	GO:0016491	oxidoreductase activity	--	--	--	--
Cluster-29767.34926	--	--	--	--	--	--	--	--	--	--	--	--	--	--	--	--	--	--	--	--	--	--	--	--	--	--	--	--
Cluster-29767.34925	1387815431	PWA80268.1	1102	1.6e-117	hypothetical protein CTI12_AA198310 [Artemisia annua]	XM_025133774.1	XM_025133774	286	1.96e-146	PREDICTED: Cynara cardunculus var. scolymus uncharacterized LOC112524119 (LOC112524119), mRNA	--	--	--	--	--	--	--	--	PF00076	RNA recognition motif. (a.k.a. RRM, RBD, or RNP domain)	--	--	GO:0003676	nucleic acid binding	--	--	--	--
Cluster-29767.34924	802608708	XP_012074101.1	150	2.2e-07	glutamic acid-rich protein [Jatropha curcas]	--	--	--	--	--	--	--	--	--	--	--	--	--	PF06703//PF08184//PF02031	Microsomal signal peptidase 25 kDa subunit (SPC25)//Cuticle protein 7 isoform family//Streptomyces extracellular neutral proteinase (M7) family	GO:0006465//GO:0006508	signal peptide processing//proteolysis	GO:0008233//GO:0008270//GO:0042302//GO:0004222	peptidase activity//zinc ion binding//structural constituent of cuticle//metalloendopeptidase activity	GO:0016021//GO:0005787//GO:0005576	integral component of membrane//signal peptidase complex//extracellular region	--	--
Cluster-29767.42377	1387821216	PWA85428.1	164	4.4e-09	transducin family protein / WD-40 repeat family protein [Artemisia annua]	--	--	--	--	--	--	--	--	--	--	--	--	--	PF06971	Putative DNA-binding protein N-terminus	GO:0045892//GO:0051775	negative regulation of transcription, DNA-templated//response to redox state	--	--	--	--	--	--
Cluster-29767.42376	1387788686	PWA57830.1	688	1.6e-69	hypothetical protein CTI12_AA275630 [Artemisia annua]	--	--	--	--	--	--	--	--	--	--	--	--	--	PF06624	Ribosome associated membrane protein RAMP4	--	--	--	--	GO:0005783	endoplasmic reticulum	--	--
Cluster-29767.34929	--	--	--	--	--	XM_025123570.1	XM_025123570	47	1.56e-13	PREDICTED: Cynara cardunculus var. scolymus dihydrolipoyllysine-residue acetyltransferase component 3 of pyruvate dehydrogenase complex, mitochondrial (LOC112516499), mRNA	--	--	--	--	--	--	--	--	--	--	--	--	--	--	--	--	--	--
Cluster-29767.34928	1387796014	PWA63690.1	294	1.1e-23	protein phosphatase 2C family protein [Artemisia annua]	XM_022134397.1	XM_022134397	44	9.53e-12	PREDICTED: Helianthus annuus eukaryotic translation initiation factor-like (LOC110886582), transcript variant X2, mRNA	--	--	--	--	Q9FX08	188	8.5e-13	Probable protein phosphatase 2C 12 OS=Arabidopsis thaliana OX=3702 GN=At1g47380 PE=2 SV=1	--	--	--	--	--	--	--	--	--	--
Cluster-19626.0	--	--	--	--	--	--	--	--	--	--	--	--	--	--	--	--	--	--	--	--	--	--	--	--	--	--	--	--
Cluster-29767.42372	--	--	--	--	--	KP332621.1	KP332621	87	3.09e-36	Chrysanthemum x morifolium microsatellite JH-781 sequence	--	--	--	--	--	--	--	--	--	--	--	--	--	--	--	--	--	--
Cluster-29767.42371	1387824473	PWA88383.1	667	6e-67	Homeodomain-like protein [Artemisia annua]	XM_022150783.1	XM_022150783	188	7.95e-92	PREDICTED: Helianthus annuus transcription factor DIVARICATA-like (LOC110904917), mRNA	--	--	--	--	Q8S9H7	295	3.1e-25	Transcription factor DIVARICATA OS=Antirrhinum majus OX=4151 GN=DIVARICATA PE=2 SV=1	--	--	--	--	--	--	--	--	--	--
Cluster-29767.42370	--	--	--	--	--	--	--	--	--	--	--	--	--	--	--	--	--	--	--	--	--	--	--	--	--	--	--	--
Cluster-29767.44928	297746181	CBI16237.3	1391	6.5e-151	unnamed protein product, partial [Vitis vinifera]	XM_025109762.1	XM_025109762	637	0	PREDICTED: Cynara cardunculus var. scolymus mitogen-activated protein kinase homolog NTF6-like (LOC112505778), transcript variant X2, mRNA	K04371	MAPK1_3	mitogen-activated protein kinase 1/3	http://www.genome.jp/dbget-bin/www_bget?ko:K04371	Q40531	1326	8.5e-145	Mitogen-activated protein kinase homolog NTF6 OS=Nicotiana tabacum OX=4097 GN=NTF6 PE=2 SV=1	PF00069//PF07714	Protein kinase domain//Protein tyrosine and serine/threonine kinase	GO:0006468	protein phosphorylation	GO:0004672//GO:0005524	protein kinase activity//ATP binding	--	--	--	--
Cluster-29767.44929	1387821110	PWA85335.1	164	2.1e-09	hypothetical protein CTI12_AA151420 [Artemisia annua]	--	--	--	--	--	--	--	--	--	--	--	--	--	--	--	--	--	--	--	--	--	--	--
Cluster-29767.68233	1387835481	PWA98629.1	1216	1.4e-130	cytochrome P450 [Artemisia annua]	XM_022165010.1	XM_022165010	310	1.3e-159	PREDICTED: Helianthus annuus flavonoid 3'-monooxygenase-like (LOC110920810), mRNA	--	--	--	--	P48419	560	6.3e-56	Flavonoid 3',5'-hydroxylase 2 OS=Petunia hybrida OX=4102 GN=CYP75A3 PE=2 SV=1	PF04831//PF00067	Popeye protein conserved region//Cytochrome P450	GO:0055114	oxidation-reduction process	GO:0005506//GO:0016705//GO:0020037	iron ion binding//oxidoreductase activity, acting on paired donors, with incorporation or reduction of molecular oxygen//heme binding	GO:0016020	membrane	--	--
Cluster-29767.66350	1387778384	PWA50133.1	495	3.9e-47	calcium-dependent lipid-binding (CaLB domain) family protein [Artemisia annua]	XM_025122079.1	XM_025122079	128	1.33e-58	PREDICTED: Cynara cardunculus var. scolymus protein C2-DOMAIN ABA-RELATED 4-like (LOC112515328), mRNA	--	--	--	--	Q9LVH4	362	3.9e-33	Protein C2-DOMAIN ABA-RELATED 4 OS=Arabidopsis thaliana OX=3702 GN=CAR4 PE=1 SV=1	--	--	--	--	--	--	--	--	--	--
Cluster-29767.23604	1387767242	PWA42621.1	372	8.9e-33	phospholipase-like protein [Artemisia annua]	XR_002551035.1	XR_002551035	72	2.24e-27	PREDICTED: Helianthus annuus uncharacterized LOC110865864 (LOC110865864), transcript variant X2, ncRNA	--	--	--	--	O04716	151	1.4e-08	DNA mismatch repair protein MSH6 OS=Arabidopsis thaliana OX=3702 GN=MSH6 PE=1 SV=2	--	--	--	--	--	--	--	--	--	--
Cluster-26686.0	--	--	--	--	--	--	--	--	--	--	--	--	--	--	--	--	--	--	--	--	--	--	--	--	--	--	--	--
Cluster-29767.44921	1340473604	XP_023763741.1	3332	0	receptor-like protein kinase THESEUS 1 [Lactuca sativa]	XM_022150569.1	XM_022150569	1001	0	PREDICTED: Helianthus annuus receptor-like protein kinase THESEUS 1 (LOC110904720), mRNA	--	--	--	--	Q9LK35	1936	2.6e-215	Receptor-like protein kinase THESEUS 1 OS=Arabidopsis thaliana OX=3702 GN=THE1 PE=1 SV=1	PF04906//PF07714//PF00069	Tweety//Protein tyrosine and serine/threonine kinase//Protein kinase domain	GO:0006468	protein phosphorylation	GO:0004672//GO:0005524	protein kinase activity//ATP binding	GO:0016021	integral component of membrane	--	--
Cluster-32421.0	--	--	--	--	--	--	--	--	--	--	--	--	--	--	--	--	--	--	--	--	--	--	--	--	--	--	--	--
Cluster-29767.44923	1387835473	PWA98621.1	349	6.4e-30	pleckstrin (PH) domain superfamily protein [Artemisia annua]	XM_023905794.1	XM_023905794	72	3.49e-27	PREDICTED: Lactuca sativa uncharacterized LOC111909993 (LOC111909993), mRNA	--	--	--	--	--	--	--	--	PF00646	F-box domain	--	--	GO:0005515	protein binding	--	--	--	--
Cluster-29767.44924	--	--	--	--	--	--	--	--	--	--	--	--	--	--	--	--	--	--	--	--	--	--	--	--	--	--	--	--
Cluster-29767.44925	1387780306	PWA51524.1	2748	4.6e-308	plant U-box 13 [Artemisia annua]	XM_025112741.1	XM_025112741	889	0	PREDICTED: Cynara cardunculus var. scolymus U-box domain-containing protein 13-like (LOC112507976), transcript variant X3, mRNA	--	--	--	--	Q9SNC6	1901	2.9e-211	U-box domain-containing protein 13 OS=Arabidopsis thaliana OX=3702 GN=PUB13 PE=1 SV=1	PF01561//PF11789//PF04564//PF00514	Hantavirus/Nairovirus glycoprotein G2//Zinc-finger of the MIZ type in Nse subunit//U-box domain//Armadillo/beta-catenin-like repeat	GO:0016567//GO:0030683	protein ubiquitination//mitigation of host immune response by virus	GO:0008270//GO:0005515//GO:0004842	zinc ion binding//protein binding//ubiquitin-protein transferase activity	GO:0019012	virion	--	--
Cluster-29767.44926	1387788989	PWA58078.1	322	2.4e-27	ribonuclease H-like domain-containing protein [Artemisia annua]	--	--	--	--	--	--	--	--	--	Q94HW2	180	2.7e-12	Retrovirus-related Pol polyprotein from transposon RE1 OS=Arabidopsis thaliana OX=3702 GN=RE1 PE=2 SV=1	--	--	--	--	--	--	--	--	--	--
Cluster-29767.44927	1340492272	XP_023772601.1	739	2.6e-75	MDIS1-interacting receptor like kinase 2-like [Lactuca sativa]	XM_022171951.1	XM_022171951	338	3.22e-175	PREDICTED: Helianthus annuus MDIS1-interacting receptor like kinase 2-like (LOC110928899), mRNA	--	--	--	--	Q8VZG8	398	3.5e-37	MDIS1-interacting receptor like kinase 2 OS=Arabidopsis thaliana OX=3702 GN=MIK2 PE=1 SV=3	PF00560//PF06026//PF13855//PF13516	Leucine Rich Repeat//Ribose 5-phosphate isomerase A (phosphoriboisomerase A)//Leucine rich repeat//Leucine Rich repeat	GO:0006098//GO:0015976//GO:0009052	pentose-phosphate shunt//carbon utilization//pentose-phosphate shunt, non-oxidative branch	GO:0004751//GO:0005515	ribose-5-phosphate isomerase activity//protein binding	--	--	--	--
Cluster-29767.35036	1340462595	XP_023758481.1	662	2.6e-66	protein TSS-like [Lactuca sativa]	XM_025111073.1	XM_025111073	298	6.48e-153	PREDICTED: Cynara cardunculus var. scolymus protein TSS-like (LOC112506796), mRNA	K03255	TIF31, CLU1	protein TIF31	http://www.genome.jp/dbget-bin/www_bget?ko:K03255	F4JKH6	603	6.9e-61	Protein TSS OS=Arabidopsis thaliana OX=3702 GN=TSS PE=1 SV=1	--	--	--	--	--	--	--	--	--	--
Cluster-29767.35037	--	--	--	--	--	--	--	--	--	--	--	--	--	--	--	--	--	--	--	--	--	--	--	--	--	--	--	--
Cluster-29767.35034	--	--	--	--	--	--	--	--	--	--	--	--	--	--	--	--	--	--	--	--	--	--	--	--	--	--	--	--
Cluster-29767.35035	--	--	--	--	--	XM_025123404.1	XM_025123404	68	6.75e-26	PREDICTED: Cynara cardunculus var. scolymus TBC1 domain family member 2B-like (LOC112516391), mRNA	--	--	--	--	--	--	--	--	--	--	--	--	--	--	--	--	--	--
Cluster-29767.35032	1009327730	AMR68993.1	711	4.1e-72	DOF transcription factor 18, partial [Chrysanthemum x morifolium]	KT235692.1	KT235692	772	0	Chrysanthemum x morifolium DOF transcription factor 18 mRNA, partial cds	--	--	--	--	Q8LDR0	377	8.3e-35	Dof zinc finger protein DOF5.4 OS=Arabidopsis thaliana OX=3702 GN=DOF5.4 PE=2 SV=2	PF02701//PF05104	Dof domain, zinc finger//Ribosome receptor lysine/proline rich region	GO:0006355//GO:0015031	regulation of transcription, DNA-templated//protein transport	GO:0003677	DNA binding	GO:0030176	integral component of endoplasmic reticulum membrane	--	--
Cluster-29767.35033	--	--	--	--	--	--	--	--	--	--	--	--	--	--	--	--	--	--	--	--	--	--	--	--	--	--	--	--
Cluster-29767.35030	1387775596	PWA48167.1	392	3e-35	hypothetical protein CTI12_AA489280 [Artemisia annua]	--	--	--	--	--	--	--	--	--	--	--	--	--	--	--	--	--	--	--	--	--	--	--
Cluster-29767.35031	1387826268	PWA90021.1	361	1.3e-31	disease resistance protein (TIR-NBS-LRR class) [Artemisia annua]	--	--	--	--	--	--	--	--	--	--	--	--	--	--	--	--	--	--	--	--	--	--	--
Cluster-24688.0	--	--	--	--	--	--	--	--	--	--	--	--	--	--	--	--	--	--	--	--	--	--	--	--	--	--	--	--
Cluster-30013.0	--	--	--	--	--	--	--	--	--	--	--	--	--	--	--	--	--	--	--	--	--	--	--	--	--	--	--	--
Cluster-29767.35038	--	--	--	--	--	--	--	--	--	--	--	--	--	--	--	--	--	--	--	--	--	--	--	--	--	--	--	--
Cluster-29767.68707	1387814224	PWA79202.1	2847	0	ENHANCED DISEASE RESISTANCE 2 [Artemisia annua]	XM_022173330.1	XM_022173330	1142	0	PREDICTED: Helianthus annuus protein ENHANCED DISEASE RESISTANCE 2-like (LOC110930106), mRNA	--	--	--	--	F4JSE7	2222	2.1e-248	Protein ENHANCED DISEASE RESISTANCE 2 OS=Arabidopsis thaliana OX=3702 GN=EDR2 PE=2 SV=1	PF01852	START domain	--	--	GO:0008289	lipid binding	--	--	--	--
Cluster-29767.71973	1387801425	PWA68200.1	2553	2.6e-285	PAP/25A-associated [Artemisia annua]	XM_025140609.1	XM_025140609	708	0	PREDICTED: Cynara cardunculus var. scolymus UTP:RNA uridylyltransferase 1 (LOC112529356), mRNA	--	--	--	--	O64642	1489	2.4e-163	UTP:RNA uridylyltransferase 1 OS=Arabidopsis thaliana OX=3702 GN=URT1 PE=1 SV=2	PF01909//PF00646	Nucleotidyltransferase domain//F-box domain	--	--	GO:0016779//GO:0005515	nucleotidyltransferase activity//protein binding	--	--	KOG2277	S-M checkpoint control protein CID1 and related nucleotidyltransferases
Cluster-29767.71972	--	--	--	--	--	--	--	--	--	--	--	--	--	--	--	--	--	--	--	--	--	--	--	--	--	--	--	--
Cluster-29767.71971	1387781845	PWA52644.1	1092	2.5e-116	hypothetical protein CTI12_AA452510 [Artemisia annua]	XM_025116630.1	XM_025116630	558	0	PREDICTED: Cynara cardunculus var. scolymus coiled-coil domain-containing protein SCD2 (LOC112511151), transcript variant X2, mRNA	--	--	--	--	Q8RWD5	795	2.6e-83	Coiled-coil domain-containing protein SCD2 OS=Arabidopsis thaliana OX=3702 GN=SCD2 PE=1 SV=1	PF08826//PF17078//PF05191//PF04136	DMPK coiled coil domain like//SWI5-dependent HO expression protein 3//Adenylate kinase, active site lid//Sec34-like family	GO:0048309//GO:0046034//GO:0016310//GO:0009069//GO:0051028//GO:0006144//GO:0006468//GO:0006886	endoplasmic reticulum inheritance//ATP metabolic process//phosphorylation//serine family amino acid metabolic process//mRNA transport//purine nucleobase metabolic process//protein phosphorylation//intracellular protein transport	GO:0005524//GO:0004674//GO:0004017	ATP binding//protein serine/threonine kinase activity//adenylate kinase activity	GO:0016020//GO:0005801	membrane//cis-Golgi network	--	--
Cluster-29767.71970	1387781845	PWA52644.1	470	1.2e-44	hypothetical protein CTI12_AA452510 [Artemisia annua]	XM_025116629.1	XM_025116629	212	1.04e-105	PREDICTED: Cynara cardunculus var. scolymus coiled-coil domain-containing protein SCD2 (LOC112511151), transcript variant X1, mRNA	--	--	--	--	Q8RWD5	226	9.3e-18	Coiled-coil domain-containing protein SCD2 OS=Arabidopsis thaliana OX=3702 GN=SCD2 PE=1 SV=1	--	--	--	--	--	--	--	--	--	--
Cluster-29767.71977	1023982054	KZV21704.1	2009	1.1e-222	COBRA-like protein 4-like [Dorcoceras hygrometricum]	XM_023906345.1	XM_023906345	794	0	PREDICTED: Lactuca sativa COBRA-like protein 4 (LOC111910506), mRNA	--	--	--	--	Q9LFW3	1920	9e-214	COBRA-like protein 4 OS=Arabidopsis thaliana OX=3702 GN=COBL4 PE=2 SV=2	PF04833	COBRA-like protein	GO:0010215	cellulose microfibril organization	--	--	GO:0031225	anchored component of membrane	--	--
Cluster-29767.71976	--	--	--	--	--	AB689124.1	AB689124	33	2.27e-06	Chrysanthemum x morifolium DNA, random amplified polymorphic fragment, B02NBS-1, cultivar: Jimba	--	--	--	--	--	--	--	--	--	--	--	--	--	--	--	--	--	--
Cluster-29767.71975	1387812292	PWA77500.1	260	1e-19	ankyrin repeat-containing domain, PGG domain protein [Artemisia annua]	--	--	--	--	--	--	--	--	--	--	--	--	--	--	--	--	--	--	--	--	--	--	--
Cluster-29767.71974	1387812292	PWA77500.1	403	2.6e-36	ankyrin repeat-containing domain, PGG domain protein [Artemisia annua]	--	--	--	--	--	--	--	--	--	--	--	--	--	PF12179//PF13606//PF00023	I-kappa-kinase-beta NEMO binding domain//Ankyrin repeat//Ankyrin repeat	GO:0016310//GO:0009069	phosphorylation//serine family amino acid metabolic process	GO:0005515//GO:0008384	protein binding//IkappaB kinase activity	GO:0008385	IkappaB kinase complex	--	--
Cluster-13862.0	1387830264	PWA93719.1	572	2.2e-56	hypothetical protein CTI12_AA068780 [Artemisia annua]	--	--	--	--	--	--	--	--	--	--	--	--	--	--	--	--	--	--	--	--	--	--	--
Cluster-29767.71979	1130862976	GAV57583.1	270	2.1e-21	hypothetical protein CFOL_v3_01120 [Cephalotus follicularis]	XM_025111601.1	XM_025111601	142	9.33e-67	PREDICTED: Cynara cardunculus var. scolymus splicing factor, arginine/serine-rich 19-like (LOC112507158), mRNA	--	--	--	--	--	--	--	--	PF01538	Hepatitis C virus non-structural protein NS2	GO:0006508	proteolysis	GO:0004197	cysteine-type endopeptidase activity	--	--	--	--
Cluster-29767.71978	1387757531	PWA37417.1	798	3.8e-82	dual specificity protein phosphatase domain-containing protein [Artemisia annua]	XM_023914046.1	XM_023914046	35	8.69e-07	PREDICTED: Lactuca sativa putative dual specificity protein phosphatase DSP8 (LOC111918374), mRNA	K14165	K14165	atypical dual specificity phosphatase	http://www.genome.jp/dbget-bin/www_bget?ko:K14165	Q9ZQP1	541	9e-54	Putative dual specificity protein phosphatase DSP8 OS=Arabidopsis thaliana OX=3702 GN=DSP8 PE=2 SV=2	PF01080	Presenilin	GO:0016485	protein processing	GO:0004190	aspartic-type endopeptidase activity	GO:0016021	integral component of membrane	KOG1719	Dual specificity phosphatase
Cluster-29767.88285	1387813370	PWA78448.1	278	4.4e-22	nitrate reductase [Artemisia annua]	XM_022912504.1	XM_022912504	81	1.36e-32	PREDICTED: Durio zibethinus nitrate reductase [NADH] 2-like (LOC111312332), mRNA	K10534	NR	nitrate reductase (NAD(P)H)	http://www.genome.jp/dbget-bin/www_bget?ko:K10534	P43101	272	8.3e-23	Nitrate reductase [NADH] OS=Cichorium intybus OX=13427 GN=NIA PE=2 SV=1	--	--	--	--	--	--	--	--	--	--
Cluster-29767.72967	--	--	--	--	--	XM_002315806.3	XM_002315806	67	5.21e-25	PREDICTED: Populus trichocarpa probable xyloglucan endotransglucosylase/hydrolase protein 28 (LOC7462652), mRNA	--	--	--	--	--	--	--	--	--	--	--	--	--	--	--	--	--	--
Cluster-26118.0	--	--	--	--	--	--	--	--	--	--	--	--	--	--	--	--	--	--	--	--	--	--	--	--	--	--	--	--
Cluster-29767.66358	1387754518	PWA36205.1	740	2.2e-75	protein DEHYDRATION-INDUCED 19 [Artemisia annua]	XM_022166791.1	XM_022166791	281	1.74e-143	PREDICTED: Helianthus annuus protein DEHYDRATION-INDUCED 19 homolog 4-like (LOC110922489), transcript variant X2, mRNA	--	--	--	--	Q8VXU6	378	8e-35	Protein DEHYDRATION-INDUCED 19 homolog 4 OS=Arabidopsis thaliana OX=3702 GN=DI19-4 PE=1 SV=1	--	--	--	--	--	--	--	--	--	--
Cluster-29767.87389	--	--	--	--	--	--	--	--	--	--	--	--	--	--	--	--	--	--	--	--	--	--	--	--	--	--	--	--
Cluster-29767.87388	--	--	--	--	--	--	--	--	--	--	--	--	--	--	--	--	--	--	--	--	--	--	--	--	--	--	--	--
Cluster-29767.87385	1387812049	PWA77289.1	340	3.4e-29	Concanavalin A-like lectin/glucanase, subgroup [Artemisia annua]	XM_024055517.1	XM_024055517	136	4.39e-63	PREDICTED: Quercus suber BRASSINOSTEROID INSENSITIVE 1-associated receptor kinase 1-like (LOC112022891), transcript variant X2, mRNA	K13416	BAK1	brassinosteroid insensitive 1-associated receptor kinase 1	http://www.genome.jp/dbget-bin/www_bget?ko:K13416	Q9SKG5	302	3.3e-26	Somatic embryogenesis receptor kinase 4 OS=Arabidopsis thaliana OX=3702 GN=SERK4 PE=1 SV=2	--	--	--	--	--	--	--	--	--	--
Cluster-29767.87384	1387812049	PWA77289.1	488	5.4e-46	Concanavalin A-like lectin/glucanase, subgroup [Artemisia annua]	XM_025103487.1	XM_025103487	176	5.97e-85	PREDICTED: Cynara cardunculus var. scolymus BRASSINOSTEROID INSENSITIVE 1-associated receptor kinase 1-like (LOC112500154), transcript variant X2, mRNA	K13416	BAK1	brassinosteroid insensitive 1-associated receptor kinase 1	http://www.genome.jp/dbget-bin/www_bget?ko:K13416	Q9XIC7	379	9e-35	Somatic embryogenesis receptor kinase 2 OS=Arabidopsis thaliana OX=3702 GN=SERK2 PE=1 SV=1	--	--	--	--	--	--	--	--	--	--
Cluster-29767.87387	--	--	--	--	--	--	--	--	--	--	--	--	--	--	--	--	--	--	--	--	--	--	--	--	--	--	--	--
Cluster-29767.87386	1387836335	PWA99445.1	153	3.1e-07	aspartic proteinase-like protein 2 [Artemisia annua]	--	--	--	--	--	--	--	--	--	--	--	--	--	--	--	--	--	--	--	--	--	--	--
Cluster-29767.87381	1387826508	PWA90242.1	582	1.7e-57	non-yellowing 1 [Artemisia annua]	XM_022166156.1	XM_022166156	224	3e-112	PREDICTED: Helianthus annuus protein STAY-GREEN 1, chloroplastic-like (LOC110921816), mRNA	--	--	--	--	Q4JFW8	464	3.2e-45	Protein STAY-GREEN 1, chloroplastic OS=Solanum lycopersicum OX=4081 GN=SGR1 PE=1 SV=1	PF03047	COMC family	GO:0007165	signal transduction	GO:0005186	pheromone activity	--	--	--	--
Cluster-29767.87380	--	--	--	--	--	--	--	--	--	--	--	--	--	--	--	--	--	--	--	--	--	--	--	--	--	--	--	--
Cluster-29767.87383	--	--	--	--	--	--	--	--	--	--	--	--	--	--	--	--	--	--	--	--	--	--	--	--	--	--	--	--
Cluster-29767.87382	1387785173	PWA55123.1	268	1.3e-20	P-loop containing nucleoside triphosphate hydrolases superfamily protein [Artemisia annua]	XM_023085589.1	XM_023085589	66	6.39e-24	PREDICTED: Cucurbita moschata kinesin-like protein KIN-4C (LOC111446675), transcript variant X3, mRNA	K10395	KIF4_21_27	kinesin family member 4/21/27	http://www.genome.jp/dbget-bin/www_bget?ko:K10395	B9F2Y7	207	6.1e-15	Kinesin-like protein KIN-4C OS=Oryza sativa subsp. japonica OX=39947 GN=KIN4C PE=2 SV=1	PF03071	GNT-I family	GO:0006486	protein glycosylation	GO:0008375	acetylglucosaminyltransferase activity	--	--	--	--
Cluster-29767.32565	1387804327	PWA70626.1	192	1.6e-12	hypothetical protein CTI12_AA289660 [Artemisia annua]	--	--	--	--	--	K00058	serA, PHGDH	D-3-phosphoglycerate dehydrogenase	http://www.genome.jp/dbget-bin/www_bget?ko:K00058	O49485	136	1.9e-07	D-3-phosphoglycerate dehydrogenase 1, chloroplastic OS=Arabidopsis thaliana OX=3702 GN=PGDH1 PE=1 SV=1	--	--	--	--	--	--	--	--	--	--
Cluster-29767.32564	1387804327	PWA70626.1	874	4.4e-91	hypothetical protein CTI12_AA289660 [Artemisia annua]	--	--	--	--	--	K00058	serA, PHGDH	D-3-phosphoglycerate dehydrogenase	http://www.genome.jp/dbget-bin/www_bget?ko:K00058	O49485	589	1.9e-59	D-3-phosphoglycerate dehydrogenase 1, chloroplastic OS=Arabidopsis thaliana OX=3702 GN=PGDH1 PE=1 SV=1	PF03854	P-11 zinc finger	--	--	GO:0008270//GO:0003723	zinc ion binding//RNA binding	--	--	--	--
Cluster-29767.32567	--	--	--	--	--	--	--	--	--	--	--	--	--	--	--	--	--	--	--	--	--	--	--	--	--	--	--	--
Cluster-29767.32566	1322358368	PLY66405.1	235	3.3e-17	hypothetical protein LSAT_9X83520 [Lactuca sativa]	--	--	--	--	--	--	--	--	--	Q9SWR3	234	1.6e-18	Methionine S-methyltransferase OS=Wedelia biflora OX=101473 GN=MMT1 PE=1 SV=1	--	--	--	--	--	--	--	--	--	--
Cluster-29767.32561	--	--	--	--	--	--	--	--	--	--	--	--	--	--	--	--	--	--	--	--	--	--	--	--	--	--	--	--
Cluster-29767.32560	1387824292	PWA88217.1	1715	1.3e-188	RAS associated with diabetes protein 51C [Artemisia annua]	XM_025137060.1	XM_025137060	641	0	PREDICTED: Cynara cardunculus var. scolymus DNA repair protein RAD51 homolog 3 (LOC112526680), mRNA	K10870	RAD51L2, RAD51C	RAD51-like protein 2	http://www.genome.jp/dbget-bin/www_bget?ko:K10870	Q8GXF0	1224	4.4e-133	DNA repair protein RAD51 homolog 3 OS=Arabidopsis thaliana OX=3702 GN=RAD51C PE=1 SV=2	PF00154//PF03796	recA bacterial DNA recombination protein//DnaB-like helicase C terminal domain	GO:0006260//GO:0006281	DNA replication//DNA repair	GO:0005524//GO:0003697//GO:0003678	ATP binding//single-stranded DNA binding//DNA helicase activity	GO:0005657	replication fork	KOG1433	DNA repair protein RAD51/RHP55
Cluster-29767.32563	1387830463	PWA93902.1	484	2e-46	hypothetical protein CTI12_AA065600 [Artemisia annua]	XM_006486948.3	XM_006486948	60	2.1e-21	PREDICTED: Citrus sinensis D-3-phosphoglycerate dehydrogenase 1, chloroplastic (LOC102609596), mRNA	K00058	serA, PHGDH	D-3-phosphoglycerate dehydrogenase	http://www.genome.jp/dbget-bin/www_bget?ko:K00058	O49485	317	1.7e-28	D-3-phosphoglycerate dehydrogenase 1, chloroplastic OS=Arabidopsis thaliana OX=3702 GN=PGDH1 PE=1 SV=1	--	--	--	--	--	--	--	--	--	--
Cluster-29767.32562	--	--	--	--	--	KP332134.1	KP332134	143	2.04e-67	Chrysanthemum x morifolium microsatellite JH-293 sequence	--	--	--	--	--	--	--	--	--	--	--	--	--	--	--	--	--	--
Cluster-27306.0	--	--	--	--	--	--	--	--	--	--	--	--	--	--	--	--	--	--	--	--	--	--	--	--	--	--	--	--
Cluster-29767.63860	1387812218	PWA77436.1	1017	1.1e-107	pleiotropic drug resistance protein PDR/CDR [Artemisia annua]	XM_022128733.1	XM_022128733	397	0	PREDICTED: Helianthus annuus ABC transporter G family member 29-like (LOC110880158), mRNA	--	--	--	--	Q94A18	746	1.1e-77	ABC transporter G family member 29 OS=Arabidopsis thaliana OX=3702 GN=ABCG29 PE=2 SV=2	PF01061	ABC-2 type transporter	--	--	--	--	GO:0016020	membrane	--	--
Cluster-29767.32569	--	--	--	--	--	LC371380.1	LC371380	40	4.75e-10	Prunus avium MGST gene, promoter region	--	--	--	--	--	--	--	--	--	--	--	--	--	--	--	--	--	--
Cluster-29767.32568	1387836860	PWA99952.1	238	5.9e-18	ribonuclease H-like domain-containing protein [Artemisia annua]	--	--	--	--	--	--	--	--	--	--	--	--	--	--	--	--	--	--	--	--	--	--	--
[truncated: 148,134 more rows]
