# Supplementary material for: Transcriptome analysis during axillary bud growth in chrysanthemum (chrysanthemum×morifolium)
Source: PeerJ. 2023 Dec 15;11:e16436. doi: 10.7717/peerj.16436 (PMC10726743; doi:10.7717/peerj.16436)
Supplement: Supplemental Information 10 [file peerj-11-16436-s010.xlsx]

## Sheet: Sheet1
Supplementary table 8. The FPKM of DEGs in Flavonoid biosynthesis
GeneID	Kegg Description	CW_0h	CW_24h	CW_48h
Cluster-29767.47851	chalcone isomerase	1.50333	0.0666667	0.276667
Cluster-29767.29703	caffeoyl-CoA O-methyltransferase	22.8733	6.34	3.86
Cluster-29767.50506	caffeoyl-CoA O-methyltransferase	10.4433	21.4467	20.8667
Cluster-29767.65129	caffeoyl-CoA O-methyltransferase	150.06	21.9567	15.2433
Cluster-29767.65128	caffeoyl-CoA O-methyltransferase	15.65	2.51	1.16
Cluster-14851.0	chalcone synthase	5.30667	14.3233	8.79667
Cluster-29767.63406	chalcone isomerase	186.153	312.617	223.937
Cluster-29767.65262	trans-cinnamate 4-monooxygenase	555.113	105.3	119.14
Cluster-29767.43248	caffeoyl-CoA O-methyltransferase	183.897	25.89	27.5367
Cluster-29767.61138	caffeoyl-CoA O-methyltransferase	310.203	91.24	102.99
Cluster-29767.48788	shikimate O-hydroxycinnamoyltransferase	14.7967	31.8333	20.0467
Cluster-29767.43249	caffeoyl-CoA O-methyltransferase	70.6967	6.8	14.5133
Cluster-29767.60841	caffeoyl-CoA O-methyltransferase	26.17	4.24667	2.12333
Cluster-29767.60842	caffeoyl-CoA O-methyltransferase	49.7733	9.01333	5.57667
Cluster-29767.95011	shikimate O-hydroxycinnamoyltransferase	0.64	0.0766667	0.22
Cluster-29767.60403	shikimate O-hydroxycinnamoyltransferase	45.6233	15.1767	33.05
Cluster-29767.67322	caffeoyl-CoA O-methyltransferase	78.31	13.1867	13.29
Cluster-29767.82562	shikimate O-hydroxycinnamoyltransferase	11.36	2.63	2.46
Cluster-29767.75508	shikimate O-hydroxycinnamoyltransferase	9.92667	1.94333	1.44333
Cluster-29767.89178	chalcone synthase	56.22	163.813	132.017
Cluster-29767.6734	chalcone synthase	2.38	6.09667	4.89333
Cluster-29767.9448	shikimate O-hydroxycinnamoyltransferase	0.983333	2.98333	1.57667
Cluster-29767.67323	caffeoyl-CoA O-methyltransferase	149.127	11.7667	7.56667
Cluster-29767.18057	flavonoid 3'-monooxygenase	14.8267	36.7033	30.7633
Cluster-29767.67325	caffeoyl-CoA O-methyltransferase	82.5433	10.64	15.9
Cluster-29767.71734	trans-cinnamate 4-monooxygenase	83.1567	20.9533	29.2633
Cluster-29767.81744	flavonoid 3'-monooxygenase	2.01333	0.693333	2.9
Cluster-29767.38606	coumaroylquinate(coumaroylshikimate) 3'-monooxygenase	4.01333	0.723333	2.11
Cluster-29767.39223	flavonoid 3'-monooxygenase	1.76	5.36333	4.60667
Cluster-29767.32669	chalcone synthase	8.16333	39.1533	8.33
Cluster-28835.0	shikimate O-hydroxycinnamoyltransferase	0.0366667	0.83	0.44
Cluster-29767.4056	chalcone synthase	3.13	9.38	6.00333
Cluster-29767.47851	chalcone isomerase	1.50333	0.0666667	0.276667
Cluster-29767.102277	shikimate O-hydroxycinnamoyltransferase	0.95	3.02667	7.31667
Cluster-29767.30646	shikimate O-hydroxycinnamoyltransferase	4.85667	1.61667	1.77667
Cluster-29767.56972	trans-cinnamate 4-monooxygenase	102.843	40.8133	32.9733
Cluster-29767.92337	caffeoyl-CoA O-methyltransferase	4.94	9.31	26.0733
Cluster-29767.66269	shikimate O-hydroxycinnamoyltransferase	11.53	3.79	2.81333
Cluster-29767.84864	chalcone isomerase	11.66	6.08333	4.23
Cluster-29767.16340	chalcone synthase	2.14	3.45333	13.56
Cluster-29767.62991	caffeoyl-CoA O-methyltransferase	115.153	53.7033	66.8233
Cluster-29767.66274	shikimate O-hydroxycinnamoyltransferase	9.26667	7.95667	2.20667
Cluster-29767.66275	shikimate O-hydroxycinnamoyltransferase	21.7	12.3167	6.30333
Cluster-29767.55814	coumaroylquinate(coumaroylshikimate) 3'-monooxygenase	57.86	26.3467	17.8033
Cluster-29767.72809	coumaroylquinate(coumaroylshikimate) 3'-monooxygenase	87.18	42.45	42.49
