# Supplementary material for: Transcriptome analysis during axillary bud growth in chrysanthemum (chrysanthemum×morifolium)
Source: PeerJ. 2023 Dec 15;11:e16436. doi: 10.7717/peerj.16436 (PMC10726743; doi:10.7717/peerj.16436)
Supplement: Supplemental Information 11 [file peerj-11-16436-s011.xlsx]

## Sheet: 3
Supplementary table 9. The FPKM of DEGs in Phenylpropanoid biosynthesis
GeneID	Kegg Description	CW_0h	CW_24h	CW_48h
Cluster-29767.33676	peroxidase	4.49667	0.433333	0.653333
Cluster-29767.29703	caffeoyl-CoA O-methyltransferase	22.8733	6.34	3.86
Cluster-29767.55025	peroxidase	54.9367	103.61	129.96
Cluster-29767.65129	caffeoyl-CoA O-methyltransferase	150.06	21.9567	15.2433
Cluster-29767.65128	caffeoyl-CoA O-methyltransferase	15.65	2.51	1.16
Cluster-29767.61138	caffeoyl-CoA O-methyltransferase	310.203	91.24	102.99
Cluster-29767.66787	caffeic acid 3-O-methyltransferase	101.713	23.0067	26.52
Cluster-29767.66788	caffeic acid 3-O-methyltransferase	94.2333	14.5933	19.4267
Cluster-29767.66789	caffeic acid 3-O-methyltransferase	123.707	10.48	25.67
Cluster-29767.53394	caffeic acid 3-O-methyltransferase	26.7267	36.88	30.4033
Cluster-29767.60841	caffeoyl-CoA O-methyltransferase	26.17	4.24667	2.12333
Cluster-29767.60842	caffeoyl-CoA O-methyltransferase	49.7733	9.01333	5.57667
Cluster-29767.53760	beta-glucosidase	3.75667	1.16	4.61
Cluster-29767.66300	phenylalanine ammonia-lyase	226.687	30.0433	34.9633
Cluster-29767.9448	shikimate O-hydroxycinnamoyltransferase	0.983333	2.98333	1.57667
Cluster-29767.66034	cinnamoyl-CoA reductase	151.89	42.4467	32.7633
Cluster-29767.53383	phenylalanine ammonia-lyase	118.573	12.67	13.5067
Cluster-29767.40203	peroxidase	2.58333	6.63	4.84
Cluster-29767.43937	cinnamyl-alcohol dehydrogenase	79.35	21.5967	16.46
Cluster-29767.50506	caffeoyl-CoA O-methyltransferase	10.4433	21.4467	20.8667
Cluster-29767.7037	peroxidase	0.0833333	0.556667	0.87
Cluster-29767.62195	peroxidase	115.727	29.02	31.4233
Cluster-29767.35876	4-coumarate--CoA ligase	2.94333	0.566667	2.38
Cluster-29767.48788	shikimate O-hydroxycinnamoyltransferase	14.7967	31.8333	20.0467
Cluster-29767.45073	beta-glucosidase	9.66	2.14667	2.55
Cluster-29767.35135	phenylalanine ammonia-lyase	71.4867	1.44333	4.69
Cluster-29767.15158	cinnamyl-alcohol dehydrogenase	4.04	0.15	0.5
Cluster-29767.61546	cinnamyl-alcohol dehydrogenase	239.973	363.537	304.15
Cluster-29767.67323	caffeoyl-CoA O-methyltransferase	149.127	11.7667	7.56667
Cluster-29767.67322	caffeoyl-CoA O-methyltransferase	78.31	13.1867	13.29
Cluster-29767.67325	caffeoyl-CoA O-methyltransferase	82.5433	10.64	15.9
Cluster-29767.39210	peroxidase	1.61333	0.0233333	0.06
Cluster-29767.66298	phenylalanine ammonia-lyase	248.54	10.45	15.5267
Cluster-29767.55158	caffeic acid 3-O-methyltransferase	55.31	96.8433	106.923
Cluster-29767.50757	beta-glucosidase	10.18	2.86	6.82667
Cluster-29767.79845	beta-glucosidase	9.52333	2.21333	8.75
Cluster-29767.65091	beta-glucosidase	25.5267	99.9833	66.1867
Cluster-29767.26271	peroxidase	4.83	0.0766667	0
Cluster-29767.57009	peroxidase	59.4233	13.2533	15.2667
Cluster-29767.60528	beta-glucosidase	44.55	73.1367	75.0633
Cluster-29767.43038	4-coumarate--CoA ligase	154.153	10.16	26.7967
Cluster-29767.38606	coumaroylquinate(coumaroylshikimate) 3'-monooxygenase	4.01333	0.723333	2.11
Cluster-29767.69566	phenylalanine ammonia-lyase	137.34	22.5433	23.7933
Cluster-29767.48335	4-coumarate--CoA ligase	183.423	18.19	31.5033
Cluster-29767.48336	4-coumarate--CoA ligase	96.26	18.3	15.5433
Cluster-29767.14702	coniferyl-aldehyde dehydrogenase	1.43	0.243333	1.07333
Cluster-29767.46845	cinnamyl-alcohol dehydrogenase	222.427	71.0733	105.003
Cluster-29767.47701	cinnamoyl-CoA reductase	3.41333	0.69	0.993333
Cluster-29767.51338	cinnamyl-alcohol dehydrogenase	149.233	18.8533	14.53
Cluster-29767.49844	caffeic acid 3-O-methyltransferase	2.79333	0.66	3.02
Cluster-29767.71908	caffeoylshikimate esterase	24.3533	8.15333	10.4467
Cluster-29767.88426	beta-glucosidase	21.0633	5.82333	13.9267
Cluster-29767.43248	caffeoyl-CoA O-methyltransferase	183.897	25.89	27.5367
Cluster-29767.43249	caffeoyl-CoA O-methyltransferase	70.6967	6.8	14.5133
Cluster-29767.98088	peroxidase	27.38	5.97	11.7933
Cluster-29767.64022	cinnamyl-alcohol dehydrogenase	67.6867	172.97	93.9133
Cluster-29767.56870	phenylalanine ammonia-lyase	318.79	71.2833	174.347
Cluster-29767.66818	peroxidase	5.52	0.333333	0.526667
Cluster-29767.95011	shikimate O-hydroxycinnamoyltransferase	0.64	0.0766667	0.22
Cluster-29767.60403	shikimate O-hydroxycinnamoyltransferase	45.6233	15.1767	33.05
Cluster-29767.82562	shikimate O-hydroxycinnamoyltransferase	11.36	2.63	2.46
Cluster-29767.99808	peroxidase	13.6467	3.32667	7.50333
Cluster-29767.7846	cinnamoyl-CoA reductase	34.3433	50.2833	56.0467
Cluster-29767.62764	peroxidase	5.05	8.67333	19.8333
Cluster-29767.66826	phenylalanine ammonia-lyase	358.887	26.3	26.0933
Cluster-29767.62084	phenylalanine ammonia-lyase	290.13	36.6667	39.1933
Cluster-29767.36052	peroxidase	13.4233	3.95667	16.3067
Cluster-29767.71734	trans-cinnamate 4-monooxygenase	83.1567	20.9533	29.2633
Cluster-29767.56869	phenylalanine ammonia-lyase	200.507	36.7467	128.637
Cluster-29767.59735	cinnamyl-alcohol dehydrogenase	154.62	342.953	222.513
Cluster-29767.59734	cinnamyl-alcohol dehydrogenase	13.8667	5.23667	4.09
Cluster-29767.56271	cinnamyl-alcohol dehydrogenase	63.3233	186.297	86.7767
Cluster-29767.60074	phenylalanine ammonia-lyase	222.397	38.4133	17.96
Cluster-29767.60075	phenylalanine ammonia-lyase	263.713	55.4567	36.7333
Cluster-29767.42681	caffeic acid 3-O-methyltransferase	7	120.24	69.3467
Cluster-29767.65262	trans-cinnamate 4-monooxygenase	555.113	105.3	119.14
Cluster-29767.44911	beta-glucosidase	5.81	10.2067	8.8
Cluster-29767.45934	4-coumarate--CoA ligase	40.6533	6.38667	7.94
Cluster-22658.0	caffeic acid 3-O-methyltransferase	2.2	0.0966667	0
Cluster-29767.63172	peroxidase	276.227	93.6733	79.8533
Cluster-29767.93628	beta-glucosidase	3.1	1.06333	3.16667
Cluster-29767.5515	peroxidase	2.79667	0.46	1.77667
Cluster-29767.40093	peroxidase	8.57667	1.64333	2.44333
Cluster-29767.75508	shikimate O-hydroxycinnamoyltransferase	9.92667	1.94333	1.44333
Cluster-29767.58459	beta-glucosidase	13.55	3.64	2.63667
Cluster-29767.60282	cinnamyl-alcohol dehydrogenase	8.14	2.59	4.77
Cluster-29767.101866	peroxidase	25.2233	70.5567	47.2867
Cluster-29767.57429	peroxidase	9.12333	18.8067	19.02
Cluster-29767.66790	caffeic acid 3-O-methyltransferase	102.38	11.08	26.5233
Cluster-29767.59828	peroxidase	27.7633	8.43333	5.8
Cluster-29767.27630	cinnamyl-alcohol dehydrogenase	2.17	0.12	0.346667
Cluster-29767.56490	beta-glucosidase	12.18	24.9067	26.6333
Cluster-29767.103532	beta-glucosidase	0.226667	0.0133333	0.496667
Cluster-29767.71597	coniferyl-aldehyde dehydrogenase	3.17667	8.76333	8.24
Cluster-29767.66843	peroxidase	50.1067	9.47	10.99
Cluster-28835.0	shikimate O-hydroxycinnamoyltransferase	0.0366667	0.83	0.44
Cluster-29767.102277	shikimate O-hydroxycinnamoyltransferase	0.95	3.02667	7.31667
Cluster-29767.53392	peroxidase	78.0967	50.5833	17.37
Cluster-29767.63319	peroxidase	247.43	86.9833	99.7067
Cluster-29767.65289	beta-glucosidase	11.6033	3.87333	4.03667
Cluster-29767.37815	peroxidase	6.16333	1.54333	1.43
Cluster-29767.37813	peroxidase	78.8067	21.07	32.0767
Cluster-29767.108765	peroxidase	2.78333	0.52	0.476667
Cluster-29767.66035	cinnamoyl-CoA reductase	70.34	27.1367	25.9667
Cluster-29767.60852	peroxidase	51.8933	37.52	25.8433
Cluster-29767.78001	caffeic acid 3-O-methyltransferase	0.456667	0.693333	1.64333
Cluster-29767.30646	shikimate O-hydroxycinnamoyltransferase	4.85667	1.61667	1.77667
Cluster-29767.32689	caffeic acid 3-O-methyltransferase	0.79	1.93667	2.90667
Cluster-29767.34602	beta-glucosidase	7.97667	5.22	2.86667
Cluster-29767.50858	peroxidase	18.3267	14.8433	4.45333
Cluster-29767.92337	caffeoyl-CoA O-methyltransferase	4.94	9.31	26.0733
Cluster-29767.62511	phenylalanine ammonia-lyase	675.71	290.73	335.09
Cluster-29767.62991	caffeoyl-CoA O-methyltransferase	115.153	53.7033	66.8233
Cluster-29767.55814	coumaroylquinate(coumaroylshikimate) 3'-monooxygenase	57.86	26.3467	17.8033
Cluster-29767.109546	beta-glucosidase	2.19667	0.503333	0.82
Cluster-29767.71908	caffeoylshikimate esterase	24.3533	8.15333	10.4467
Cluster-29767.56972	trans-cinnamate 4-monooxygenase	102.843	40.8133	32.9733
Cluster-29767.66269	shikimate O-hydroxycinnamoyltransferase	11.53	3.79	2.81333
Cluster-29767.58051	peroxidase	9.72	9.94333	2.77333
Cluster-29767.60067	peroxidase	118.753	68.4633	40.3067
Cluster-29767.9702	peroxidase	1.42333	0.453333	0.183333
Cluster-29767.66274	shikimate O-hydroxycinnamoyltransferase	9.26667	7.95667	2.20667
Cluster-29767.66275	shikimate O-hydroxycinnamoyltransferase	21.7	12.3167	6.30333
Cluster-29767.32090	peroxidase	2.86667	3.93333	9.32667
Cluster-29767.41673	peroxidase	20.3233	9.97333	8.46333
Cluster-29767.1854	peroxidase	8.85667	0.52	0.503333
Cluster-29767.13611	peroxidase	1.73667	0.93	5.51
Cluster-29767.72809	coumaroylquinate(coumaroylshikimate) 3'-monooxygenase	87.18	42.45	42.49
Cluster-29767.69566	phenylalanine ammonia-lyase	137.34	22.5433	23.7933
Cluster-29767.12980	caffeic acid 3-O-methyltransferase	2.54667	2.16667	10.2333
Cluster-29767.21193	beta-glucosidase	0.493333	0.08	1.27
Cluster-27271.0	cinnamyl-alcohol dehydrogenase	0.353333	0.84	0
Cluster-29767.29163	beta-glucosidase	0.46	0.02	0.403333
Cluster-29767.104585	coniferyl-aldehyde dehydrogenase	7.19333	2.97667	9.93333
Cluster-29767.52633	cinnamyl-alcohol dehydrogenase	1.60333	0.53	2.79667
Cluster-29767.87440	beta-glucosidase	7.47	10.5267	7.22667
Cluster-29767.56092	caffeic acid 3-O-methyltransferase	4.72	6.29333	5.34
Cluster-29767.28786	peroxidase	2.83	1.29	4.05667
Cluster-29767.37608	beta-glucosidase	11.78	8.27667	20.8667
Cluster-29767.13612	peroxidase	4.22667	0	5.71333
Cluster-29767.79263	peroxidase	0.61	0.08	1.09667
Cluster-29767.27692	beta-glucosidase	2.06333	0.386667	3.45667
Cluster-29767.67989	beta-glucosidase	0.743333	0.293333	1.76
Cluster-29767.4850	peroxidase	0.28	0.11	0.466667
Cluster-29767.62815	peroxidase	12.9267	12.71	11.13
Cluster-29767.23943	peroxidase	1.87667	2.72667	0.346667
Cluster-29767.46790	peroxidase	1.75	0.643333	2.32
Cluster-29767.1958	beta-glucosidase	0.523333	0.186667	0.816667
Cluster-29767.51439	beta-glucosidase	2.94667	1.51	3.46333
Cluster-29767.47302	peroxidase	73.22	118.533	71.9433
Cluster-29767.21802	beta-glucosidase	2.4	0.82	8.78333
Cluster-29767.43059	peroxidase	7.06333	6.98667	4.23
Cluster-29767.99915	beta-glucosidase	7.09	5.28667	16.2067
Cluster-29767.87278	coniferyl-aldehyde dehydrogenase	9.78333	5.02333	19.0833
