# Supplementary material for: Transcriptome analysis during axillary bud growth in chrysanthemum (chrysanthemum×morifolium)
Source: PeerJ. 2023 Dec 15;11:e16436. doi: 10.7717/peerj.16436 (PMC10726743; doi:10.7717/peerj.16436)
Supplement: Supplemental Information 12 [file peerj-11-16436-s012.xlsx]

## Sheet: qRT-PCR
Sample	Cluster-29767.57110-8	Cluster-29767.70205-12	Cluster-29767.76010-16	Cluster-29767.73322-19	Cluster-29767.94549-20	Cluster-29767.56803-23	Cluster-29767.60624-27	Cluster-29767.48641-28	ACTIN
0h WT-1	26.5787	26.5775	26.8334	27.0249	26.5416	27.5438	26.7292	26.2699	27.1656
0h WT-1	26.4814	26.3997	26.7653	27.1687	26.609	27.6201	26.6631	26.3422	27.1168
0h WT-1	26.7119	26.4869	26.7689	27.0419	26.5173	27.5735	26.7371	26.2363	27.4565
0h WT-2	27.0262	26.9122	27.2587	27.2293	26.7904	28.016	26.7293	26.0727	27.1969
0h WT-2	26.6003	26.7821	27.2919	26.9856	26.5066	27.7305	26.607	26.0824	27.1292
0h WT-2	26.7837	26.8854	27.1656	27.0763	26.533	27.7278	26.5901	26.064	27.0172
0h WT-3	26.4814	26.1557	26.2458	26.7346	25.9149	27.2334	26.466	25.9789	26.7707
0h WT-3	26.359	26.1515	26.1857	26.8138	25.9765	27.3591	26.1938	25.9814	26.5568
0h WT-3	26.6081	26.2435	26.3847	26.9969	26.02	27.4522	26.4139	26.0715	26.7954
0h 15-1	26.5679	27.0494	27.0366	27.3284	26.5233	28.0646	26.6897	26.5926	27.353
0h 15-1	26.5522	26.8468	27.092	27.2344	26.5458	28.0553	26.7033	26.5778	27.1095
0h 15-1	26.4254	27.0249	27.1927	27.455	26.7014	28.0643	26.7665	26.7537	27.0432
0h 15-2	26.8394	26.4962	26.6028	27.3243	26.2388	28.5469	26.7708	26.2509	27.4907
0h 15-2	26.9655	26.6039	26.6645	27.1927	26.0834	28.5522	26.7404	26.2194	27.6561
0h 15-2	26.8521	26.7169	26.5916	27.2051	26.1668	28.5318	26.6474	26.2601	27.663
0h 15-3	26.7557	26.5501	26.3177	26.6561	25.8168	27.6373	25.8171	25.7416	27.0617
0h 15-3	26.8348	26.4155	26.3415	26.3285	25.9169	27.7115	25.7836	25.8723	27.0718
0h 15-3	26.8321	26.3443	26.3093	26.4032	25.7226	27.5281	25.6283	25.7872	26.8628
24h WT-1	26.2425	26.834	26.4979	27.2216	26.034	28.2565	26.3265	26.4618	27.5056
24h WT-1	26.2882	26.8987	26.3196	27.0586	26.0535	27.9843	26.1465	26.3422	27.3316
24h WT-1	26.2774	27.0419	26.444	26.9609	26.1559	28.0749	26.2114	26.3092	27.4788
24h WT-2	26.7059	26.724	26.4112	27.541	25.9113	28.4581	26.1858	26.3251	27.176
24h WT-2	26.5212	26.7136	26.4465	27.4377	25.9338	28.5161	26.1302	26.2655	26.9461
24h WT-2	26.6744	26.876	26.3974	27.5633	25.1171	28.4955	26.1126	26.3501	27.1651
24h WT-3	26.193	27.0918	26.6262	28.0041	25.3884	28.912	26.3548	26.6267	27.4231
24h WT-3	26.1209	27.0409	26.6443	27.8408	25.3867	29.2202	26.4428	26.6101	27.2389
24h WT-3	26.3728	27.1105	26.9544	27.9103	25.4314	29.0069	26.3062	27.0095	27.2173
24h 15.24-1	26.6923	26.5297	26.2375	27.3967	25.2814	27.901	25.9712	25.6913	26.8177
24h 15.24-1	26.6302	26.5553	26.1666	27.4447	25.0809	27.9226	26.0848	26.2974	26.9246
24h 15.24-1	26.5756	26.5215	26.2681	27.4229	25.1031	27.8372	26.0717	26.3743	26.9224
24h 15.24-2	26.8001	27.0851	26.4865	27.366	25.6394	28.4326	26.2691	26.2162	27.6227
24h 15.24-2	26.8867	27.067	26.453	27.2762	25.6628	28.4271	26.2139	26.2171	27.6533
24h 15.24-2	26.8636	27.0775	26.3981	27.3499	25.6977	28.4244	26.3046	26.0848	27.3356
24h 15.24-3	26.933	27.226	26.8393	27.5325	25.9453	28.1376	25.9745	27.0807	27.3762
24h 15.24-3	26.965	27.164	26.9232	27.3693	26.0046	28.0317	25.8314	27.0495	27.4187
24h 15.24-3	26.8681	27.2739	26.7754	27.3413	25.8115	28.2506	25.8781	27.0079	27.3168
48h WT-1	27.1193	27.7181	27.0037	27.3964	26.4679	29.1272	27.0459	26.853	28.1421
48h WT-1	27.0826	27.5213	27.0094	27.317	26.4191	28.8314	27.0752	26.8117	27.7769
48h WT-1	27.0902	27.6234	26.8624	27.2771	26.445	28.809	27.0044	26.8482	27.8836
48h WT-2	26.9848	26.5426	26.0795	26.293	25.4333	27.6301	26.3851	26.2702	26.8031
48h WT-2	26.8073	26.5795	25.9796	26.3364	25.4389	27.6007	26.3955	26.2543	26.8561
48h WT-2	26.7837	26.4143	25.9532	26.1794	25.5113	27.4456	26.3832	26.2653	26.7042
48h WT-3	26.6438	27.0207	26.3147	26.8132	26.0006	28.0371	26.4029	26.7235	27.7001
48h WT-3	26.6978	27.1268	26.3393	26.8642	26.0436	27.9507	26.401	26.7982	27.5244
48h WT-3	26.6158	27.1621	26.397	27.0684	26.0217	27.9011	26.394	26.7249	27.5902
48h 15-1	26.2585	27.3948	27.0327	26.8078	26.0077	28.005	26.6717	26.5488	27.6963
48h 15-1	26.3116	27.2381	27.0957	26.8406	26.0307	28.1901	26.5815	26.6442	27.536
48h 15-1	26.2351	27.2257	27.0167	26.0096	25.9731	28.3509	26.8286	26.6713	27.4519
48h 15-2	26.6852	27.1571	27.4696	26.3458	26.2889	27.6876	27.0853	26.7276	27.5617
48h 15-2	26.48	27.1709	27.3788	26.1876	26.0409	27.6476	26.6145	26.7566	27.9121
48h 15-2	26.2912	27.2171	27.2466	26.2301	25.8729	27.3959	26.473	26.7958	27.4773
48h 15-3	26.2514	27.1073	26.5505	25.8727	26.0605	27.7398	26.1428	26.839	27.1422
48h 15-3	26.3353	27.0123	26.5663	25.8511	26.0721	27.771	26.0566	26.7668	27.0191
48h 15-3	26.3814	27.0973	26.5314	25.9602	25.9124	27.7284	26.0785	26.8662	27.1176

## Sheet: phenotype
sample	axillary buds	nodes
C15	3	10
C15	6	14
C15	4	11
C15	4	11
C15	5	11
C15	4	11
CW	1	16
CW	1	15
CW	0	10
CW	1	11
CW	0	17
CW	1	15
